# Supplementary material for: CRISPR screening using an expanded toolkit of autophagy reporters identifies TMEM41B as a novel autophagy factor
Source: PLoS Biol. 2019 Apr 1;17(4):e2007044. doi: 10.1371/journal.pbio.2007044 (PMC6459555; doi:10.1371/journal.pbio.2007044)
Supplement: S2 Data — Normalized read counts from each sequencing experiment. See “read_me” tab for sample identity. (XLSX) [file pbio.2007044.s009.xlsx]

## Sheet: read_me
Sample Key for samples listed in 'Normalized read counts' tab.
Sample name	Reporter	Red:Green Ratio	replicate	Reads
sample1	LC3_rep1	top 30%	1	19961091
sample2	LC3_rep1	bottom 30%	1	21604840
sample3	LC3_rep2	top 30%	2	24624386
sample4	LC3_rep2	bottom 30%	2	23341210
sample5	SQSTM1_rep1	top 30%	1	14998448
sample6	SQSTM1_rep1	bottom 30%	1	16518400
sample7	SQSTM1_rep2	top 30%	2	21503339
sample8	SQSTM1_rep2	bottom 30%	2	21933179
sample9	SQSTM1_rep3	top 30%	3	24161696
sample10	SQSTM1_rep3	bottom 30%	3	22800593
Sample11	NBR1_rep1	top 30%	1	31079388
Sample12	NBR1_rep1	bottom 30%	1	20011798
Sample13	NBR1_rep2	top 30%	2	21455995
Sample14	NBR1_rep2	bottom 30%	2	17954870
Sample15	NBR1_rep3	top 30%	3	66369713
Sample16	NBR1_rep3	bottom 30%	3	51788273
Sample17	NBR1_rep4	top 30%	4	37012358
Sample18	NBR1_rep4	bottom 30%	4	22996047
Sample19	TAX1BP1_rep1	top 30%	1	42813695
Sample20	TAX1BP1_rep1	bottom 30%	1	41030721
Sample21	TAX1BP1_rep2	top 30%	2	51631683
Sample22	TAX1BP1_rep2	bottom 30%	2	30314241
Sample23	NDP52_rep1	top 30%	1	62029965
Sample24	NDP52_rep1	bottom 30%	1	22108666
Sample25	NDP52_rep2	top 30%	2	47752026
Sample26	NDP52_rep2	bottom 30%	2	39255428

## Sheet: Normalized read counts
sgRNA	Gene	sample1	sample2	sample3	sample4	sample5	sample6	sample7	sample8	sample9	sample10	sample11	sample12	sample13	sample14	sample15	sample16	sample17	sample18	sample19	sample20	sample21	sample22	sample23	sample24	sample25	sample26	sample27	sample28	sample29	sample30
RDH11_CTGCATTGTTGATCAAAACG	RDH11	185.077	131.519	154.683	98.6181	146.867	127.408	126.325	144.706	208.359	243.41	171.252	162.244	168.721	166.859	162.241	139.661	193.896	140.298	141.113	79.2938	146.681	103.008	192.837	220.47	155.087	198.216	203.549	151.284	128.894	117.794
SLC25A3_GTATAGCAATATGCTTGGAG	SLC25A3	295.275	243.506	310.519	203.9	312.563	312.574	394.603	374.459	274.156	179.016	245.283	264.998	235.187	171.409	270.96	181.933	290.47	199.561	232.77	146.552	354.57	116.361	246.849	171.616	251.012	156.597	181.786	46.7785	273.9	261.874
STRADA_GATATGGCACGATATTGGGA	STRADA	467.636	595.091	571.402	675.668	514.034	473.958	543.067	572.478	478.86	524.168	543.19	554.333	417.968	624.962	481.288	513.159	461.907	556.353	516.975	705.148	534.889	611.373	494.145	521.111	516.384	502.946	683.616	433.945	463.788	511.092
CCDC92_GAGCATGCCAGCACGCTCAA	CCDC92	180.838	104.174	196.239	158.589	184.525	140.998	154.976	213.251	155.965	146.818	150.738	154.132	195.563	185.061	158.896	157.319	196.142	212.865	114.077	140.888	127.932	105.87	147.306	101.466	143.025	178.465	145.941	180.147	170.324	141.159
MAMSTR_CACGTGCCGCGGATACCCCG	MAMSTR	453.508	468.781	475.591	506.418	576.17	501.138	612.09	592.788	514.196	437.88	573.516	529.996	507.441	556.701	551.118	631.416	536.77	578.123	484.664	656.298	580.106	713.427	375.854	453.467	368.189	507.178	491.589	571.295	453.43	515.959
ATF4_TCTCTTAGATGATTACCTGG	ATF4	16.9536	10.4174	8.08043	10.6614	0	5.09632	2.60464	3.80806	0	0	0.891938	4.0561	0	0	3.76333	10.1669	1.49727	0	0	0	0	0	0	6.26335	0	0	0	0	0	0
EXOC7_TGTGCGACACGACTTCTCCA	EXOC7	487.415	283.873	444.424	381.146	483.908	456.97	477.951	369.382	561.716	386.364	462.916	471.859	478.043	377.707	511.812	503.527	497.841	460.805	610.61	701.608	695.907	609.465	376.747	255.545	461.816	308.257	476.227	301.572	400.492	461.443
FUT8_GTCAGACGCACAGACAAAGT	FUT8	98.8959	108.08	81.9586	79.9607	77.1993	76.4448	117.209	101.548	80.4192	43.788	74.0309	82.4739	127.819	86.4631	142.17	86.1508	105.557	128.203	67.9188	50.2666	94.8462	60.0881	57.5833	56.3701	70.0765	70.5394	96.0135	186.119	92.0671	76.9071
APITD1_CACCAGTGAATTACTCCTCC	APITD1	224.635	260.434	213.554	189.24	273.022	212.347	200.557	176.44	215.67	302.652	253.31	236.606	166.165	216.916	217.018	281.462	182.666	273.339	334.319	177.703	234.358	222.231	261.58	253.039	221.718	256.763	207.389	234.888	163.419	396.218
KLB_CAGGGCCTGTCGGTTCACCG	KLB	702.161	994.857	744.554	927.544	736.217	711.786	738.415	845.389	706.714	801.062	653.791	820.683	812.928	920.757	867.656	768.401	739.65	775.266	762.933	862.32	914.825	862.217	676.269	790.435	641.602	817.552	719.462	767.366	741.14	1008.55
PECR_ACAATGCAACATCCGGAATG	PECR	374.391	355.492	325.526	351.827	273.022	344.851	455.812	406.193	406.97	377.349	440.617	382.625	377.066	405.012	357.934	430.754	405.011	337.44	419.382	349.742	339.682	435.877	370.497	353.253	387.144	423.942	414.779	438.921	346.402	417.635
MLPH_TGGCCTCCCACCATTCCAAG	MLPH	469.049	423.205	387.861	459.774	431.186	380.525	457.114	336.378	383.819	423.713	407.616	434.002	331.051	417.147	335.772	359.051	357.098	339.859	289.479	172.039	192.45	165.004	399.959	389.58	408.397	375.975	460.865	262.756	339.497	406.926
PRELID2_GATTGCAATCTGTCAGAACG	PRELID2	632.933	647.178	626.811	551.729	589.35	625.149	619.904	637.215	573.901	625.91	594.923	512.42	737.515	600.691	689.943	761.444	727.671	725.678	827.555	805.681	720.721	723.919	573.601	675.189	681.81	698.34	617.047	838.031	713.52	652.25
CLTCL1_ACAATGCTGTCTGTACCACC	CLTCL1	340.484	131.519	303.593	290.524	378.465	263.31	282.603	236.1	282.686	176.44	199.794	239.31	308.044	244.22	163.077	206.548	176.677	187.467	214.966	181.243	261.379	251.798	249.974	201.68	246.991	289.917	124.178	150.288	145.006	180.099
NME6_TGTGGGCAAGGATGTAGGCT	NME6	329.182	222.671	279.352	314.512	286.202	285.394	240.929	291.951	224.199	243.41	328.233	388.033	290.149	359.505	337.863	264.874	309.934	289.062	290.798	312.927	352.365	292.81	192.837	214.207	302.708	302.614	344.369	280.671	266.995	223.907
HDAC1_TGAGTCATGCGGATTCGGTG	HDAC1	702.161	576.861	647.589	565.055	702.325	677.811	600.369	547.091	603.144	529.319	542.298	373.161	466.539	365.572	418.984	366.542	381.054	337.44	474.773	402.133	470.922	369.113	585.207	402.107	531.892	478.257	378.933	477.738	410.849	474.098
ZFYVE19_AGTCTGCAAGCAATGCCATG	ZFYVE19	668.253	522.17	527.537	599.705	666.55	555.499	674.602	670.218	588.522	584.698	574.408	593.542	571.351	594.624	634.748	639.977	689.491	753.495	665.341	584.084	532.131	604.696	744.566	645.125	627.817	592.531	652.892	527.502	507.52	587.999
FHDC1_ATATCTTCTACAATGGACCG	FHDC1	254.304	123.706	247.03	227.888	195.823	139.299	190.139	208.174	246.132	207.349	170.36	191.989	196.841	241.187	224.545	196.381	187.158	172.953	123.309	57.3464	114.146	55.3192	235.69	235.502	248.714	140.373	226.592	211.001	227.866	193.728
ABHD8_TCACCGTGTACCGCAATGGG	ABHD8	300.926	186.21	270.117	305.183	263.607	219.142	214.883	228.483	226.636	231.819	208.714	171.708	244.134	183.545	173.531	221.531	185.661	134.25	217.604	208.854	203.478	240.352	245.957	232.997	215.399	167.178	216.351	190.1	229.017	335.86
CXXC4_AAAAAGTCCCCACGCGCTCG	CXXC4	357.438	334.658	274.735	361.156	357.753	358.441	351.626	277.988	208.359	340.001	292.556	323.136	308.044	253.322	344.553	361.726	336.136	322.927	212.329	184.075	239.321	181.218	364.694	409.623	385.995	383.734	321.325	362.284	337.196	372.854
MB_CAAACTTCTCCAGAGTCTCT	MB	233.112	214.858	181.233	98.6181	160.047	147.793	217.487	225.945	289.997	206.061	203.362	167.652	247.969	251.805	225.381	255.242	202.88	257.616	198.481	238.589	198.515	150.697	219.62	201.68	210.804	192.573	171.544	201.048	254.335	167.443
FLT1_AGGTTGAGGGATACCATATG	FLT1	330.595	339.866	342.841	305.183	329.509	399.212	278.696	308.453	380.164	345.152	369.262	342.064	360.449	301.863	367.133	295.909	287.475	272.129	371.246	319.299	405.302	393.911	291.488	359.516	346.936	265.228	377.653	417.025	241.676	335.86
STEAP1B_AGTATAAGAAGTTTCCACAT	STEAP1B	305.164	341.168	319.754	249.211	321.977	355.044	306.045	337.648	327.769	318.107	331.801	369.105	357.893	254.839	360.443	364.937	330.147	279.386	240.024	235.757	325.345	248.936	286.578	303.146	330.853	350.581	323.886	318.492	333.743	300.814
Non-Targeting_GGACTTTAGTTCCAGTGGTT	Non-Targeting	528.386	576.861	602.569	499.754	521.566	558.897	519.626	493.778	522.725	504.849	623.465	442.114	507.441	580.972	597.951	658.171	648.316	643.434	576.321	523.197	628.632	758.255	481.647	509.837	578.993	474.025	610.646	564.328	553.553	591.893
C9orf41_ATGTATGCAATCATTCACAA	C9orf41	148.344	135.426	162.763	194.571	182.642	146.095	255.255	167.555	271.719	140.379	220.309	266.35	177.668	212.366	250.052	130.029	212.612	165.696	271.016	224.43	328.102	233.676	197.747	189.153	246.417	117.801	263.717	235.883	170.324	193.728
SCAND1_GCCTTCCAGTCCCAACGCCG	SCAND1	238.763	294.29	257.419	275.864	224.066	217.443	247.441	225.945	137.687	238.258	244.391	251.478	267.142	277.592	176.04	281.997	209.617	307.204	176.721	399.301	217.264	312.84	218.281	241.765	171.745	277.925	314.924	329.44	124.291	201.516
LGALS1_AGCAACCTGAATCTCAAACC	LGALS1	244.414	291.686	249.339	281.195	387.879	392.417	425.859	369.382	463.02	434.016	452.213	500.252	382.179	403.495	350.408	414.701	358.595	390.656	433.23	375.229	411.368	323.331	379.425	459.73	521.553	431.701	445.503	390.152	393.587	382.589
LRRC3C_TTTGCCACATAACAGCCCCG	LRRC3C	339.072	358.097	353.23	399.803	323.86	341.454	414.138	430.31	313.148	275.607	296.123	320.432	320.826	332.2	285.595	323.199	335.388	336.231	280.907	225.846	255.864	335.73	350.857	373.296	352.68	354.108	318.765	300.577	388.983	326.125
AKNA_TGACAGCCTTGATTCTACCT	AKNA	230.286	188.815	180.078	162.587	222.183	208.949	210.976	170.093	210.796	227.955	176.604	170.356	112.481	130.453	151.369	183.539	172.934	182.629	152.323	354.698	189.141	245.121	141.95	197.922	146.471	111.452	177.945	189.104	195.643	164.523
RDH16_ACACATACTTATCTCTCAGG	RDH16	541.102	552.12	547.161	625.026	485.791	473.958	661.579	557.246	634.824	627.198	730.497	581.374	492.103	646.198	729.667	656.565	613.879	637.387	714.137	679.661	720.169	744.902	536.998	617.566	506.619	602.407	762.988	652.908	704.313	744.734
CUL1_AACCCAATGTCTATTGAGGT	CUL1	433.729	496.127	564.476	433.12	508.385	504.536	493.579	506.472	577.556	647.804	574.408	573.261	521.501	611.31	567.426	637.302	582.437	487.413	505.105	409.213	432.874	423.478	681.18	601.282	668.025	611.577	615.767	655.894	430.414	625.966
C10orf95_GGGTCGTGGCGTAGGCCGGA	C10orf95	353.199	294.29	401.713	425.124	380.348	377.128	373.766	370.651	366.76	321.97	334.477	324.488	377.066	367.089	280.159	333.901	351.858	287.852	463.563	491.338	466.511	511.226	332.109	352	403.227	376.68	339.248	305.553	248.581	319.311
RAB29_AACGTCAAACATAATAACAC	RAB29	110.198	186.21	168.535	131.935	160.047	129.107	139.348	107.895	170.586	137.803	214.957	212.269	167.443	138.038	160.15	118.792	165.448	169.325	216.945	169.207	295.567	171.68	175.428	152.826	163.129	171.411	245.795	169.199	174.927	263.821
KIFC2_AGCAGAGCCTGAGTCTCATG	KIFC2	298.1	328.147	301.285	273.199	331.392	268.406	248.743	253.87	214.451	212.5	240.823	232.549	223.683	254.839	274.305	283.602	285.229	264.872	250.574	244.253	206.787	139.252	253.099	285.609	232.631	242.656	382.774	353.327	238.224	279.397
MTHFD2L_GCTTTCGGAGCAGCGGTGTG	MTHFD2L	316.467	286.477	266.654	421.126	312.563	382.224	359.44	356.688	271.719	414.698	298.799	324.488	412.855	450.518	347.899	306.611	336.885	305.994	309.921	364.61	409.714	352.898	336.572	343.232	299.261	301.203	325.166	304.558	346.402	373.827
FBXO18_CACTGGGAAGACCTCAACGC	FBXO18	470.462	580.768	444.424	533.071	385.996	404.308	453.207	417.617	438.65	426.289	387.101	488.083	392.404	474.789	518.921	470.351	411	476.528	406.854	312.219	407.508	443.508	474.951	427.16	451.477	378.797	290.601	384.181	449.978	438.079
PTCHD1_TAATTACCTAGCATGACGAA	PTCHD1	72.0527	128.915	108.509	107.947	120.506	90.035	87.2554	120.588	135.25	108.182	116.844	113.571	60.0749	159.274	114.154	140.731	144.486	105.223	63.303	41.0628	44.6659	52.4579	96.865	152.826	68.3533	113.568	125.458	160.241	90.9162	91.5098
CPNE4_GTGTGCACTCCATGCCACCA	CPNE4	382.868	397.162	491.752	562.39	346.455	378.827	470.138	410.001	511.759	507.425	578.868	536.757	437.141	521.813	499.268	463.395	486.612	509.184	602.038	640.014	574.592	670.507	480.307	450.961	464.688	414.066	451.904	505.606	527.084	551.006
PRKAG2_TGGCGCTGCTCGGACACCGT	PRKAG2	385.694	322.938	395.941	497.089	423.655	414.501	332.092	291.951	300.963	280.758	265.798	338.008	409.021	417.147	361.697	406.139	348.114	371.305	303.327	366.734	265.79	405.356	283.453	258.05	293.517	309.668	329.006	307.544	285.408	267.715
PRPF38B_GTAAGGCGACGACAGGATGT	PRPF38B	224.635	247.412	240.104	174.581	384.113	329.562	296.929	271.641	112.1	100.455	97.2213	140.611	93.3078	36.4055	69.4125	65.282	62.8852	36.2839	36.9268	5.66384	15.4401	5.72268	74.0995	53.8648	45.9518	26.0996	7.68108	33.8397	161.117	100.271
ZFHX3_GAGCACGTTAGGCATTAAGG	ZFHX3	142.693	244.808	204.319	223.89	167.579	212.347	165.395	284.335	258.316	274.319	159.657	244.718	221.127	313.998	223.291	257.382	245.552	179	149.685	155.048	179.215	144.021	220.513	250.534	264.797	211.618	294.442	189.104	178.38	181.073
BICD1_ACCCCGCCTGGCTAATCGTG	BICD1	866.045	829.482	966.189	900.89	937.689	1037.95	1026.23	898.701	751.798	520.304	716.226	697.648	793.756	621.928	797.825	665.662	810.021	695.441	819.642	824.089	980.445	846.956	854.822	782.919	876.531	727.261	729.703	734.522	802.134	749.601
PADI3_CATCACAGCTCGGATCATCA	PADI3	344.723	355.492	422.491	350.494	267.373	315.972	313.859	313.53	363.105	396.667	399.588	374.513	332.329	300.346	405.603	420.052	426.721	371.305	416.085	320.007	392.068	388.188	290.149	316.925	391.165	249.71	521.034	491.672	399.341	301.788
WDR18_GATGTGGAGCTGCATCGTGT	WDR18	377.217	223.973	383.243	231.886	370.933	366.935	342.51	209.443	287.56	118.485	132.899	144.667	161.052	103.149	135.898	139.125	125.77	125.784	77.1505	20.5314	45.7688	16.2143	101.329	72.6549	95.9244	88.1743	39.6856	52.7502	260.089	211.251
EMC3_AAGAAAGTGATGATAACGAT	EMC3	226.048	191.419	277.043	117.276	418.006	319.37	253.952	265.295	358.231	231.819	335.369	346.12	253.081	254.839	227.054	209.758	235.819	263.663	160.895	90.6215	124.624	105.87	321.395	170.363	276.86	181.286	121.617	180.147	273.9	277.45
MLPH_GTCCACGACTTCGACTTCGA	MLPH	600.439	609.415	672.984	591.709	551.692	694.799	565.207	557.246	559.279	597.577	716.226	682.776	658.268	608.276	674.472	666.197	696.977	648.272	711.499	678.953	704.729	770.654	562.888	474.762	561.187	565.021	523.594	596.177	649.073	759.336
PDGFA_AATCTCGTAAATGACCGTCC	PDGFA	283.972	229.182	362.465	311.847	299.383	324.466	309.952	385.883	255.879	283.334	316.638	327.192	333.607	291.244	375.496	408.28	383.3	331.393	497.852	451.691	448.314	366.251	387.014	434.676	400.355	359.751	257.316	259.77	388.983	395.244
FSTL4_TGTTCGGTATGAAGACACAG	FSTL4	202.03	225.275	206.628	314.512	195.823	197.058	174.511	195.48	209.577	220.228	197.118	200.101	136.766	241.187	168.932	165.88	208.869	198.352	238.046	156.464	137.306	140.206	135.254	194.164	244.693	208.091	172.824	88.5805	201.397	150.894
PPP6R3_TCAAAGGGGAATCGTTTAGG	PPP6R3	228.873	197.93	199.702	250.543	210.886	244.623	240.929	218.329	188.863	224.091	189.983	162.244	274.811	210.849	226.218	167.486	241.809	210.446	191.887	97.7013	137.306	111.592	177.66	186.648	231.482	162.946	161.303	278.68	194.492	246.298
CD8B_GTAGATGCGCATGTTACTGA	CD8B	200.617	169.282	148.911	301.185	212.769	195.359	187.534	180.248	212.014	217.652	239.039	202.805	194.285	250.288	198.62	219.925	244.803	233.426	305.305	466.559	372.216	494.058	203.104	151.573	174.043	204.564	119.057	125.406	237.073	216.119
CHKA_CATAACGCTCTCCAGAACCA	CHKA	151.169	164.073	154.683	111.945	107.326	117.215	128.93	114.242	131.595	181.591	76.7067	150.076	80.5259	84.9462	144.679	77.5892	93.5791	108.852	77.1505	111.861	106.978	107.777	144.182	82.6762	102.817	90.2904	108.815	107.491	80.5587	137.265
GPR55_CAGAAGCCCATGATGCCCAT	GPR55	690.858	546.911	687.991	687.662	553.575	635.341	629.021	794.615	589.741	515.153	692.144	709.817	600.749	555.184	568.262	623.389	623.611	618.035	664.682	673.289	705.832	819.297	658.86	690.221	676.066	658.838	729.703	816.135	582.324	791.462
HSCB_AATAAGCTACCTGAGACCTC	HSCB	262.78	208.347	232.024	182.577	263.607	300.683	237.022	143.437	230.291	122.349	171.252	182.524	143.157	104.666	173.113	122.537	148.229	159.649	81.107	64.4262	53.4889	77.2561	219.62	100.214	227.462	115.685	51.2072	141.331	261.24	213.198
ID4_CGCAGCCCGACGGCGCCTTG	ID4	162.472	115.893	181.233	166.585	152.516	157.986	109.395	114.242	155.965	133.94	163.225	144.667	278.645	213.883	194.439	203.872	187.907	181.419	222.22	158.588	210.647	185.987	142.842	161.594	157.959	160.83	213.79	156.26	166.872	205.41
Non-Targeting_CAATATCGGGTGCTACAGGA	Non-Targeting	986.133	966.21	945.41	920.88	756.929	896.953	915.531	990.095	850.494	1004.55	1113.14	927.494	1132.48	1198.35	1208.45	1213.07	1170.86	1263.89	1268.04	1360.03	1233	1238.01	1025.79	949.524	926.504	958.631	1163.68	1103.77	1015.04	1091.3
DMRTA1_CCCCGGATGCCCGACCACCG	DMRTA1	96.0703	58.5976	111.972	74.6299	80.9651	101.926	95.0694	76.1611	162.057	193.182	129.331	136.555	169.999	183.545	141.752	140.731	165.448	163.277	169.467	154.34	227.19	200.294	154.002	141.552	112.008	100.871	148.501	251.808	192.19	164.523
DRG1_GAGCCTTAAGCAGCCCTAAG	DRG1	490.241	470.083	432.88	474.433	474.493	521.524	454.51	639.754	483.734	549.925	542.298	479.971	681.275	354.954	582.061	526.001	610.136	527.326	553.901	386.557	564.114	381.512	480.307	519.858	481.92	502.946	629.849	440.912	685.9	568.529
FJX1_GTTGATGCCGTAGCGCACGC	FJX1	152.582	119.8	210.091	215.894	197.705	157.986	199.255	149.784	181.552	238.258	264.014	191.989	265.863	226.018	199.456	164.275	146.732	192.305	172.764	329.211	224.984	288.041	213.371	206.691	186.105	208.797	154.902	118.439	186.436	170.364
SAXO2_TGTAGAACGTTTGACCACAG	SAXO2	202.03	208.347	256.265	317.177	271.139	312.574	227.906	256.409	247.35	275.607	261.338	250.126	240.3	268.491	286.849	226.346	293.464	221.332	282.226	348.326	265.239	247.983	328.537	345.737	299.261	267.344	291.881	264.746	303.821	246.298
ZBTB9_GCATCGGCTTCAATGACACT	ZBTB9	305.164	378.931	368.237	334.502	408.591	406.007	309.952	252.601	280.249	369.622	379.074	348.824	397.517	254.839	344.553	338.717	333.89	312.041	371.905	438.24	349.608	386.281	441.919	497.31	395.186	392.904	320.045	402.096	362.514	343.648
MPRIP_CTCTGTGACATCGTAACATG	MPRIP	210.507	179.699	170.843	229.221	203.354	130.806	161.488	125.666	106.007	168.712	151.629	205.509	249.247	191.129	172.277	135.915	147.481	162.068	114.077	130.268	147.784	108.731	102.222	136.541	151.067	203.153	122.897	157.255	157.665	141.159
ANKRD66_TGTGTCTCCAAAGAAGTCAG	ANKRD66	364.502	483.105	469.819	479.764	401.06	436.585	451.905	402.385	392.348	528.031	361.235	342.064	533.005	477.823	474.179	452.693	400.519	373.724	423.339	518.241	411.919	439.692	364.694	463.488	450.902	407.718	533.835	531.483	461.486	413.741
ARCN1_ACCATATACAGTTTCTCCAT	ARCN1	488.828	391.953	384.398	343.831	350.221	387.32	388.091	289.412	342.391	236.97	98.1132	133.851	148.27	145.622	201.965	201.197	244.054	120.946	100.889	72.922	40.2545	61.9957	251.313	174.121	224.59	150.249	55.0478	75.6418	109.33	139.212
TLE3_AGACCCCACATACATGACCA	TLE3	326.356	250.017	334.761	185.242	308.797	331.261	296.929	318.607	272.938	327.122	296.123	315.023	263.307	301.863	303.993	296.444	272.502	291.48	414.767	405.673	460.997	421.571	332.109	358.264	268.818	353.402	366.132	291.619	330.291	257.98
GPR161_TTCCAGAGTCCATAGATCAG	GPR161	170.949	108.08	123.515	98.6181	112.975	139.299	96.3717	87.5853	107.226	149.394	201.578	179.82	86.9169	113.767	150.533	150.363	97.3223	162.068	167.489	126.728	113.043	134.483	154.448	159.089	146.471	174.938	97.2937	104.505	140.402	121.689
NMT2_CGGGATAGACGGGGACAATG	NMT2	138.454	143.239	161.609	171.915	133.687	171.576	140.651	195.48	176.679	208.637	186.415	205.509	161.052	172.926	133.389	160.529	150.475	140.298	212.329	217.35	216.713	156.42	127.219	159.089	156.236	160.124	139.54	149.293	136.95	110.006
PRPH2_AAGTCGAATCAAGAGCAACG	PRPH2	315.054	313.823	268.963	287.858	225.949	246.322	252.65	319.877	270.501	184.167	258.662	289.335	194.285	178.994	232.072	304.471	251.541	243.102	218.263	290.272	166.532	237.491	341.036	265.566	267.095	211.618	297.002	410.058	291.162	229.748
C1QTNF5_ACGGCGAAGTAGTAGACCCC	C1QTNF5	172.361	115.893	249.339	138.598	241.012	231.033	197.953	158.669	194.956	258.864	239.039	252.83	209.623	245.737	156.387	166.415	201.382	212.865	226.176	220.182	212.301	268.012	201.318	265.566	200.465	253.942	234.273	256.784	224.413	219.039
GOLT1A_TGGGAGACTCACGTTTCCAA	GOLT1A	521.322	583.372	550.624	591.709	529.097	531.716	523.533	529.32	375.29	516.44	598.49	617.879	524.058	573.387	510.14	521.721	490.355	509.184	514.996	663.377	577.349	576.083	685.197	552.427	611.159	582.656	496.71	408.068	499.464	542.244
CENPB_TCTCCCTACGACAAGCTCGA	CENPB	0	9.11519	0	0	0	0	0	0	0	0	0	0	0	0	0	0	3.74317	7.25678	0	0	2.20573	0.95378	0	0	0	0	0	0	0	0
C2CD5_TAAATTTATAGGTATCCGTG	C2CD5	288.211	257.83	248.185	171.915	175.111	214.046	190.139	181.517	221.762	269.167	313.07	198.749	173.834	238.153	207.401	169.626	238.065	192.305	262.444	353.99	214.507	330.962	146.413	154.078	202.188	215.851	263.717	267.732	265.844	297.894
WT1_CGCTCTCGTACCCTGTGCTG	WT1	487.415	481.803	391.324	646.349	478.259	399.212	451.905	432.849	469.112	406.971	513.756	498.9	610.975	518.779	468.743	394.902	452.923	495.88	412.129	442.488	499.597	440.646	553.961	457.225	531.892	450.747	435.261	417.025	494.861	553.926
SLC38A11_AAGAACCCACAGTAGCTAAG	SLC38A11	339.072	404.975	470.974	346.496	397.294	378.827	408.928	294.49	516.633	533.183	373.722	356.936	416.69	568.836	605.059	508.878	600.404	639.806	377.84	347.618	357.879	362.436	503.073	626.335	618.052	506.473	509.512	477.738	475.296	510.118
ACTRT1_GGTAACAGGATGGGATGACA	ACTRT1	275.496	251.319	281.661	211.896	192.057	239.527	200.557	270.372	248.568	224.091	318.422	323.136	189.172	286.694	243.362	202.802	237.317	232.217	386.412	425.496	486.363	328.1	379.425	418.392	320.514	349.17	380.214	447.879	232.469	333.913
SLC44A2_TGCGAAAACCTGCAACCCAG	SLC44A2	113.024	156.26	77.3413	106.614	94.1454	98.5289	123.72	107.895	142.561	133.94	86.518	85.178	76.6914	116.801	155.969	88.8263	120.53	143.926	89.0198	102.657	118.006	168.819	207.568	125.267	109.71	107.22	70.4099	95.5475	90.9162	142.132
ZCWPW1_CTCTGGGGAACTGATCCCCG	ZCWPW1	282.56	303.405	259.728	291.856	241.012	265.009	287.813	294.49	309.492	293.637	384.425	338.008	356.615	344.336	376.751	288.953	309.934	304.785	230.133	245.669	250.35	268.012	276.311	320.684	329.704	248.299	435.261	361.289	271.598	272.582
SCAPER_AAGCTGCTGAGCTAAGCAGT	SCAPER	313.641	313.823	234.332	331.837	254.193	186.865	307.348	200.558	227.854	221.516	239.039	259.59	290.149	341.302	293.958	284.672	247.798	232.217	297.392	179.119	332.513	186.941	192.391	181.637	271.69	238.423	222.751	157.255	227.866	337.807
ZNRF3_ATGATGTTGTGCCGACAGTG	ZNRF3	344.723	319.032	338.224	358.49	276.788	339.755	388.091	319.877	268.064	266.591	386.209	339.36	314.435	291.244	365.461	286.813	364.584	320.508	348.826	453.107	276.819	392.957	395.941	413.381	388.293	353.402	225.312	242.85	301.52	449.761
TEP1_CCTACGGGGGAACAAAGCGT	TEP1	132.803	85.9432	111.972	114.61	122.389	161.384	115.906	114.242	160.838	119.773	90.9777	129.795	94.586	122.869	108.718	136.45	111.546	135.46	176.721	97.7013	133.446	31.4747	94.6331	96.4556	93.6268	148.133	121.617	146.307	100.123	114.874
NCR1_GACTTTGTTAATCCGCTCAG	NCR1	282.56	259.132	316.291	239.882	269.256	309.177	276.092	331.301	346.046	224.091	323.774	282.575	356.615	438.383	293.539	328.55	315.175	256.406	303.327	317.175	349.056	333.823	296.398	270.577	361.296	283.568	291.881	330.435	400.492	303.735
PRCC_ACATCTCCCTTATGCAACTC	PRCC	566.532	463.572	529.845	577.049	664.667	523.222	599.067	417.617	509.322	414.698	509.297	459.691	313.156	408.045	402.676	393.832	414.743	403.961	390.369	589.04	371.113	380.558	571.369	368.285	459.518	411.245	359.731	294.605	618	493.569
FAM178A_AAATCAAACATCAAATATGG	FAM178A	368.74	367.212	353.23	205.232	448.132	378.827	210.976	346.533	304.618	414.698	343.396	267.702	302.931	292.761	324.064	303.401	332.393	298.737	227.495	257.705	207.338	247.029	249.528	266.819	261.925	260.996	275.239	262.756	307.274	315.417
DMRTA2_GCCCGGGACGTCGTCCCCAG	DMRTA2	146.931	152.354	168.535	150.593	135.569	171.576	127.627	112.972	121.847	164.849	115.06	150.076	167.443	80.3956	122.517	119.862	123.524	156.021	154.301	146.552	158.261	177.403	131.236	171.616	142.451	196.805	184.346	148.298	109.33	125.583
TLR3_ACTTACCTTCTGCTTGACAA	TLR3	514.258	397.162	473.282	426.457	427.42	400.911	449.3	432.849	461.801	406.971	470.943	448.875	536.84	520.296	641.856	634.626	563.721	521.278	636.327	626.562	523.86	576.083	391.924	483.531	541.083	432.407	427.58	460.818	573.118	524.721
HSPE1-MOB4_TGTCTAGTATAGTCTATAGC	HSPE1-MOB4	189.315	173.189	181.233	194.571	167.579	174.974	153.674	161.208	204.703	209.925	166.792	174.412	163.608	128.936	193.184	163.74	175.929	163.277	70.5565	92.0374	66.7232	33.3823	295.059	174.121	283.178	161.535	102.414	98.5334	220.961	142.132
FAM53A_CTCACACCATGGGTCTTCAG	FAM53A	778.452	608.113	645.28	735.638	683.496	676.112	623.811	761.611	637.261	477.804	678.765	805.811	775.861	690.188	680.744	606.801	652.059	680.927	696.333	686.741	620.912	794.498	623.596	681.452	661.132	695.519	714.341	720.588	810.19	646.409
TNFSF10_CCTGGGAATCATCAAGGAGT	TNFSF10	110.198	209.649	148.911	189.24	193.94	154.588	242.232	195.48	164.494	240.834	241.715	246.07	276.089	156.24	228.308	205.478	212.612	249.149	223.539	199.65	249.798	236.537	216.049	253.039	182.084	181.992	224.032	236.878	117.386	146.026
PARP1_TACCGATCACCGTACCCACA	PARP1	471.875	347.679	438.652	490.425	519.683	456.97	423.254	384.614	539.783	510.001	415.643	596.246	373.231	461.137	426.092	530.282	406.508	458.386	408.172	346.202	347.953	384.373	466.47	507.331	477.899	498.008	376.373	529.493	445.374	401.085
ACKR3_GCACTGCTACATCTTGAACC	ACKR3	378.63	341.168	368.237	543.732	310.68	332.96	321.673	266.564	375.29	346.44	485.214	448.875	434.584	403.495	416.475	409.35	406.508	408.798	416.745	391.513	306.596	351.945	373.622	316.925	368.763	460.622	463.425	444.893	445.374	418.609
SPIB_CCAGCTACCCTGATTCAGAG	SPIB	142.693	147.145	192.776	198.569	169.462	125.709	144.558	152.322	99.9148	191.894	163.225	141.963	221.127	198.714	163.496	168.021	187.907	216.494	118.693	132.392	79.4061	94.4242	207.568	141.552	158.534	220.083	224.032	158.251	176.078	166.47
UHRF1BP1_CTTACGCTCTAGCTGCATGG	UHRF1BP1	655.538	759.165	655.669	954.197	619.477	665.919	630.323	661.333	483.734	493.259	644.871	494.844	543.23	631.029	523.102	566.669	520.3	586.589	671.276	521.073	586.172	474.028	615.115	588.755	607.139	500.83	623.448	485.7	676.693	519.853
TIMM22_GCTGGCATCGATACCAACGT	TIMM22	337.659	380.233	334.761	385.144	327.626	343.152	335.999	371.92	353.357	327.122	205.146	252.83	278.645	244.22	250.052	217.25	181.169	336.231	179.359	155.756	199.067	149.743	237.922	174.121	250.437	150.249	119.057	116.449	279.654	339.754
COMMD4_CCTGGCAGAAATCAGCACGC	COMMD4	401.235	567.746	380.935	562.39	478.259	363.538	406.324	425.233	398.441	440.455	474.511	401.553	360.449	414.113	479.197	407.745	372.071	428.15	252.553	668.333	249.247	831.696	394.602	538.648	374.507	578.423	258.596	525.511	330.291	345.595
FAM216B_TCCAACAGGCCCTCAACCAA	FAM216B	563.706	455.759	507.913	470.435	455.664	455.271	509.207	478.546	381.382	408.258	479.863	554.333	490.825	458.103	532.302	451.623	446.185	578.123	513.677	353.99	489.12	490.243	524.946	569.965	547.401	565.726	532.555	544.422	325.687	484.807
RABAC1_TCCAGGGCCGGATGGTCGCG	RABAC1	94.6575	67.7128	45.0195	69.2992	92.2625	78.1436	88.5578	87.5853	42.6466	72.1214	55.3002	93.2902	47.293	78.8787	87.3928	114.511	85.3442	87.0813	20.4416	14.1596	6.61718	2.86134	47.3165	37.5801	68.9277	51.4938	66.5694	34.835	28.771	61.331
CCND2_ACTCCCATTATAGGTCTGTG	CCND2	457.747	562.537	626.811	511.748	642.072	536.813	463.626	426.502	600.707	678.713	634.168	573.261	490.825	741.763	587.915	491.22	558.48	515.231	602.038	654.882	573.489	523.625	618.24	625.082	685.257	562.904	811.635	827.083	612.246	634.727
ARL6IP1_AAAATTCTAGGCGCTAGAAT	ARL6IP1	169.536	158.865	208.937	109.28	205.237	188.564	161.488	176.44	218.107	197.046	166.792	173.06	189.172	216.916	164.75	153.573	141.492	154.811	199.141	145.136	295.567	148.79	231.226	176.626	229.759	217.967	151.061	156.26	237.073	200.543
SHPK_GCATTCTGGTCGGACATCAG	SHPK	511.433	644.574	586.408	481.097	521.566	682.907	587.346	639.754	545.876	533.183	589.571	577.318	538.118	546.083	596.278	705.794	635.59	574.495	617.204	642.846	588.929	625.679	599.492	546.164	553.145	478.963	600.405	559.351	563.911	641.542
EXOSC1_AAGTACACATCCTGTATGTG	EXOSC1	363.089	348.981	323.217	294.522	335.158	400.911	290.417	304.645	333.862	403.107	333.585	359.64	295.262	244.22	441.982	394.902	440.196	377.352	474.773	429.036	406.405	487.381	224.084	221.723	307.303	315.311	503.111	464.799	395.888	397.191
RPL27_GTTCATGAAACCTGGGAAGG	RPL27	122.913	104.174	106.2	146.595	163.813	105.324	82.0462	107.895	56.0498	38.6364	57.976	77.0658	83.0823	77.3618	36.797	53.5098	60.6393	45.9596	31.6515	19.8234	1.65429	14.3067	64.7254	57.6228	62.6094	72.6556	7.68108	4.97643	35.676	20.4437
ZFP69B_TCACCGGAATCTGTACCGGG	ZFP69B	265.606	196.628	274.735	183.91	293.734	317.671	247.441	277.988	208.359	193.182	210.497	260.942	256.916	266.974	175.622	205.478	180.421	214.075	308.602	184.783	292.81	210.785	209.353	186.648	187.828	207.386	110.096	183.133	182.983	185.94
SNTB1_CCAGACCCAAGCCCTGTACG	SNTB1	339.072	451.853	295.513	469.103	493.322	411.103	351.626	366.843	292.433	395.38	415.643	413.722	512.554	450.518	444.491	431.289	379.557	424.521	389.05	465.851	372.768	437.785	471.38	504.826	441.138	401.369	495.43	572.29	382.078	374.801
LRRC20_AGGCCGTGGCCAGAGTAGCA	LRRC20	774.213	755.258	655.669	800.939	632.657	832.399	837.392	767.958	599.489	772.729	671.629	678.72	521.501	582.489	606.314	710.61	711.95	731.725	639.624	649.218	676.606	544.608	745.905	671.431	632.986	584.772	850.04	863.909	689.352	972.535
BTBD1_TTTGACGCCATGTTCAACGG	BTBD1	161.059	179.699	160.454	178.579	220.3	319.37	229.208	310.991	134.032	170	176.604	189.284	253.081	232.085	189.421	209.758	193.896	204.399	201.119	372.398	146.129	288.995	216.049	205.438	240.098	274.398	121.617	106.496	200.246	246.298
HAUS5_AGCTACAGGCCAAACAGCAG	HAUS5	620.218	761.769	696.071	467.77	736.217	738.967	588.649	472.199	460.583	356.743	371.938	573.261	334.886	388.326	427.765	458.579	389.289	499.508	247.277	127.436	105.875	109.685	520.035	353.253	371.061	271.577	78.091	73.6512	293.464	325.152
Non-Targeting_GGAGTATAAAAAAGTGGTGT	Non-Targeting	313.641	286.477	324.372	171.915	374.699	321.068	273.487	275.449	300.963	364.47	322.882	275.814	384.735	242.704	311.938	372.428	294.961	246.73	167.489	174.871	181.972	159.281	268.276	357.011	251.012	315.311	416.059	471.766	417.754	429.317
LOXL1_ACAGACTGTGCGAGTAGCGG	LOXL1	289.624	161.469	320.909	307.849	433.069	324.466	380.277	284.335	272.938	282.046	350.532	327.192	301.653	347.369	364.625	386.876	335.388	353.163	415.426	391.513	309.904	345.268	366.034	410.876	342.916	272.282	478.788	476.742	272.749	289.132
EMC9_CAAAAACAGCCCGTTGACTG	EMC9	211.92	263.038	206.628	165.252	231.598	288.792	207.069	196.75	215.67	225.379	216.741	221.733	281.202	323.099	216.182	210.829	229.83	171.744	158.258	111.861	151.644	184.079	195.962	266.819	219.42	313.9	212.51	235.883	246.279	183.02
EPB41L2_CTAAGAGGGTCACTTTACAC	EPB41L2	230.286	350.284	401.713	330.504	220.3	248.021	270.883	279.258	255.879	271.743	271.149	262.294	461.426	414.113	290.612	390.086	369.076	354.373	474.773	365.318	432.874	482.612	265.151	328.2	284.327	318.133	339.248	304.558	290.011	375.774
MKL1_GAGCAGTGAGCGCTCCGAGG	MKL1	456.334	421.903	474.437	513.081	523.449	468.862	423.254	364.304	428.902	488.107	520	538.109	503.607	403.495	362.116	603.055	455.918	486.204	564.452	672.581	605.472	619.003	449.507	483.531	477.899	499.419	398.136	761.394	426.961	499.41
VAX1_AGAACGCGCACAAGGAGAGT	VAX1	145.518	210.951	195.085	195.904	188.291	174.974	151.069	124.397	141.343	256.288	153.413	202.805	140.601	174.443	169.768	207.083	176.677	212.865	211.01	223.722	211.75	282.319	154.448	135.288	140.153	165.768	235.553	260.765	197.944	227.801
TAOK1_GAAATAGCAGCAATTACACA	TAOK1	625.87	605.509	558.704	422.459	562.99	535.114	492.277	563.592	610.455	642.653	619.005	574.614	616.087	658.333	590.842	670.478	570.458	685.765	702.268	773.114	652.343	792.591	667.342	682.705	595.651	640.498	798.833	810.163	683.598	613.31
GALNT3_GTATAATATCCTTGCAAACA	GALNT3	169.536	192.721	152.374	94.6201	146.867	151.191	108.093	167.555	231.51	251.137	247.959	225.789	233.909	207.815	235.835	190.495	249.295	212.865	228.155	309.387	240.424	317.609	195.515	142.804	175.191	180.581	257.316	271.713	189.888	185.94
GRIK1_AATGACTTTCTCCCGCACGT	GRIK1	254.304	149.749	189.313	211.896	199.588	186.865	205.767	189.133	221.762	177.728	305.043	243.366	210.901	192.646	200.293	186.214	199.885	238.264	183.974	232.925	220.021	250.844	207.568	275.587	187.254	221.494	224.032	186.119	203.698	185.94
OR11H12_TGGGCATCTCTGTGCCAAAC	OR11H12	395.583	442.738	458.276	410.465	434.952	392.417	556.091	421.425	618.984	522.88	633.276	589.486	423.081	473.272	439.055	469.281	467.896	541.839	426.636	466.559	378.282	485.474	392.37	417.139	457.221	612.282	503.111	513.568	467.24	409.847
FTO_GTCTAATATAAAACACACCG	FTO	83.3551	101.569	107.354	50.6418	152.516	166.48	89.8601	148.514	131.595	124.924	96.3293	97.3463	108.646	75.8449	144.679	127.888	162.453	90.7097	94.2951	170.623	137.858	118.269	81.688	105.224	140.153	126.266	80.6514	177.161	119.687	183.02
WDR53_TGTAAATTTGTAATCCAGAG	WDR53	103.134	127.613	125.824	105.282	120.506	76.4448	82.0462	143.437	88.9485	121.061	206.038	224.437	138.044	156.24	196.529	138.055	184.912	170.534	161.555	81.4177	126.829	85.8402	122.755	112.74	126.942	119.212	122.897	148.298	127.743	143.106
CSF3R_CGGGACCTCTCGTCCCACTC	CSF3R	200.617	136.728	153.528	145.262	237.247	125.709	104.186	192.942	183.989	227.955	205.146	163.596	216.014	191.129	209.074	266.479	218.601	193.514	198.481	153.632	221.675	170.727	226.762	238.007	182.659	152.365	222.751	242.85	238.224	224.88
STX12_AGCATCATCCAGACGTGCAG	STX12	590.55	457.061	656.824	510.416	555.458	555.499	544.37	571.209	505.666	493.259	561.921	559.741	626.313	603.725	547.355	408.815	562.972	474.109	383.774	470.807	521.654	372.928	529.856	400.854	462.965	524.108	440.382	453.851	594.983	573.396
TRIM27_GAGCCCATGATGCTCGACTG	TRIM27	211.92	179.699	181.233	265.203	171.345	193.66	196.65	167.555	180.334	217.652	206.038	196.045	186.616	239.67	183.567	202.267	158.71	223.751	172.105	222.306	244.284	367.205	140.164	189.153	160.257	187.635	180.505	232.897	180.682	242.404
C11orf68_GCCACTTGCCCGAGAGCACG	C11orf68	426.665	371.118	339.378	385.144	463.196	385.622	464.928	423.964	464.238	459.774	491.458	470.507	428.193	496.025	441.982	412.025	443.939	466.853	408.832	317.175	411.368	350.037	373.176	397.096	507.193	359.046	440.382	415.035	460.335	458.522
RWDD1_CCTTTATGAAATATTCTCCC	RWDD1	339.072	382.838	312.828	241.215	436.835	400.911	315.161	331.301	406.97	444.319	420.995	350.176	332.329	335.234	365.879	401.859	432.71	358.001	453.672	396.469	462.1	344.314	364.694	408.37	405.525	413.361	404.537	457.832	437.319	430.291
CLUH_CCCATCCGATGCCTTCAACG	CLUH	412.537	273.456	376.317	375.815	344.572	338.056	341.208	360.496	349.702	479.092	396.021	310.967	467.817	312.481	319.883	329.085	345.869	269.71	349.485	311.511	298.324	268.012	352.642	404.612	407.248	346.348	282.92	497.643	478.749	423.476
MPZL2_TGGGTTGGAAGGGATCTATG	MPZL2	240.176	175.793	227.406	251.876	248.544	315.972	269.58	233.561	229.073	278.182	268.473	242.014	219.849	177.477	181.058	222.066	213.36	145.136	169.467	107.613	231.05	229.861	227.655	212.954	200.465	256.058	168.984	187.114	179.531	124.609
BST1_CTGAACCATTCAGCATGACG	BST1	500.13	487.011	414.411	473.101	487.673	496.042	438.882	444.273	492.263	507.425	479.863	447.523	460.148	468.721	424.838	532.423	513.562	443.873	480.048	607.447	579.003	525.533	462.899	400.854	395.186	364.689	596.564	377.214	490.257	515.959
C9orf84_TTGATTATGTACAACTACAC	C9orf84	117.262	109.382	110.817	114.61	120.506	113.818	115.906	157.4	115.755	177.728	165.9	181.172	143.157	169.892	167.677	138.59	142.24	163.277	92.9763	186.199	101.463	214.6	125.88	120.256	132.686	112.158	84.4919	161.236	156.514	121.689
IBTK_TTCAGTCCTTCCACAAGCCG	IBTK	74.8783	117.195	116.589	133.268	143.101	78.1436	63.8137	78.6998	134.032	167.425	90.0858	97.3463	86.9169	54.6083	112.482	140.196	113.792	128.203	88.3604	86.3736	115.801	195.525	106.685	86.4342	104.54	86.7635	134.419	156.26	88.6146	80.8012
UBALD1_CAGCCACCATCACCACCAGA	UBALD1	408.299	390.651	473.282	478.431	530.98	514.729	553.486	373.19	470.331	306.516	299.691	269.054	350.224	247.254	357.098	496.036	370.573	384.609	336.297	143.72	267.996	103.008	400.851	266.819	462.39	244.772	121.617	157.255	368.268	258.953
LCE3D_CACTGTACTGGGCTCTTTGG	LCE3D	255.716	227.88	317.445	291.856	233.481	198.757	268.278	270.372	258.316	184.167	191.767	239.31	158.495	142.588	154.715	191.03	167.694	188.676	131.222	127.436	138.409	82.9788	146.86	166.605	194.146	180.581	121.617	94.5522	161.117	159.655
MBLAC2_GTAGGGGATGTGATCAACCT	MBLAC2	124.326	119.8	146.602	121.274	71.5505	103.625	112	123.127	70.6714	135.228	99.8971	110.867	106.09	83.4293	102.864	139.125	126.519	122.156	70.5565	137.348	146.681	80.1175	115.167	154.078	178.638	164.357	130.578	173.18	110.48	123.636
ZNF569_GGGAAAAAATCAGAGTTCAG	ZNF569	381.455	497.429	479.054	287.858	374.699	326.165	296.929	484.893	421.592	520.304	588.679	486.731	432.028	505.127	427.347	445.737	467.896	489.832	396.303	334.167	393.722	348.13	433.437	345.737	392.314	408.423	353.33	415.035	470.693	531.535
MCU_ACAGTGTGGTGTATAGTTGC	MCU	233.112	207.045	274.735	325.173	180.759	254.816	252.65	239.908	227.854	315.531	249.743	221.733	241.578	268.491	232.072	198.521	200.634	237.055	272.335	320.715	247.041	307.117	235.244	249.281	295.24	243.361	245.795	199.057	311.877	291.079
TNC_ATAGTGAAAAACAATACCCG	TNC	226.048	194.023	173.152	159.921	265.49	181.769	136.744	206.904	191.3	230.531	171.252	154.132	186.616	177.477	145.933	166.951	224.59	233.426	119.353	218.766	159.915	201.247	242.832	132.783	208.506	224.315	142.1	166.213	214.056	190.808
BTN3A2_GCATCTGTGATCATGAGAGG	BTN3A2	265.606	188.815	251.648	285.193	269.256	239.527	298.231	323.685	275.375	302.652	283.636	342.064	338.72	310.964	271.796	329.085	290.47	296.318	356.739	390.805	270.201	428.247	233.012	353.253	251.586	354.108	273.959	325.459	313.028	296.92
LOC728485_CTGAGGGCGAGTTAGCATCT	LOC728485	199.205	225.275	202.011	221.224	152.516	193.66	208.371	176.44	140.124	119.773	239.039	251.478	163.608	168.376	184.821	242.399	169.191	198.352	189.25	190.447	173.701	187.895	212.478	200.427	150.492	151.66	147.221	134.364	184.134	227.801
MAST2_CTCAGAGCGATACCACCACA	MAST2	500.13	410.183	482.517	567.721	427.42	450.175	493.579	393.499	579.993	604.016	423.671	512.42	508.719	661.367	501.359	464.465	531.53	516.441	497.852	569.216	499.597	671.461	475.397	605.04	452.626	535.394	574.801	508.592	482.201	569.502
SNRPD2_ACCCAGCACTCACCTATCGA	SNRPD2	582.073	369.816	548.315	522.41	771.993	698.196	632.927	538.205	359.45	358.031	235.472	258.238	185.337	185.061	199.874	196.916	205.874	146.345	139.794	87.7895	124.624	101.101	180.338	150.32	195.295	207.386	26.8838	14.9293	51.7877	136.291
IFNG_TGCAGGTCATTCAGATGTAG	IFNG	148.344	109.382	163.917	123.939	161.93	168.179	148.464	129.474	191.3	186.743	176.604	148.723	204.51	191.129	151.369	238.119	156.464	201.98	183.974	188.323	150.541	227	158.019	137.794	99.3708	177.759	174.105	160.241	174.927	142.132
BPIFB6_GGCATGGACATCATGAACCG	BPIFB6	132.803	188.815	232.024	217.226	184.525	137.601	197.953	275.449	171.805	233.107	166.792	189.284	227.518	247.254	117.918	185.144	171.437	209.237	183.315	133.1	111.389	207.924	147.306	200.427	130.388	198.921	218.911	253.798	150.76	230.721
PADI6_TTGCAGAAAAAATGGATCTG	PADI6	221.809	281.269	298.976	226.555	233.481	237.828	220.092	253.87	257.098	310.379	224.768	217.677	240.3	242.704	255.07	226.882	218.601	203.19	214.966	220.182	296.119	228.907	188.373	231.744	246.991	263.112	267.558	256.784	188.738	180.099
IFT57_CTAATCGTGACTTTCAGTTG	IFT57	230.286	272.153	264.346	287.858	346.455	283.695	337.301	307.183	410.625	330.986	322.882	258.238	313.156	266.974	275.977	374.034	301.699	293.899	254.531	353.282	306.044	454.953	356.213	341.979	371.635	405.602	247.075	321.478	280.805	350.463
SH2D3A_ACCAGCTCGCAGTACGTCGG	SH2D3A	697.922	701.869	606.032	888.896	736.217	631.944	734.508	680.373	648.228	665.835	554.786	604.358	692.779	626.479	631.403	611.082	614.628	680.927	644.24	743.379	709.141	775.423	640.112	641.367	651.942	624.979	497.99	574.28	635.263	574.37
LCN6_GAAGGACATGAAGAACGTCG	LCN6	748.783	752.654	741.091	831.591	760.695	810.315	824.369	851.735	788.352	685.153	646.655	747.674	811.65	659.85	802.425	789.27	859.431	783.732	821.62	761.787	735.61	562.73	812.862	680.2	722.592	793.568	687.457	850.97	672.09	675.615
NPFF_GCTGCTGCTGTTAATAGACG	NPFF	161.059	167.98	174.306	106.614	169.462	164.781	178.418	162.477	136.469	87.5759	148.062	206.861	120.15	110.733	139.661	158.389	154.218	154.811	127.925	71.506	82.1633	153.559	125.433	197.922	145.323	186.929	93.4532	181.142	154.212	127.53
PPHLN1_TTCATTCTGCCGTTTGTAGG	PPHLN1	173.774	191.419	180.078	195.904	175.111	156.287	270.883	177.709	254.661	181.591	157.873	150.076	182.781	135.004	175.204	192.635	137	216.494	178.699	267.617	233.807	229.861	188.82	243.018	207.358	246.183	179.225	165.218	211.754	232.668
ARFGAP1_GCTCTGTTACTATGGACAAG	ARFGAP1	394.171	337.262	392.478	353.16	318.212	366.935	368.557	324.954	371.634	377.349	264.014	421.834	363.006	362.538	335.354	338.182	350.36	312.041	360.036	421.956	370.011	422.524	464.238	398.349	415.29	417.593	481.348	437.926	369.419	346.569
ACY1_AGGCACAAAGGTCATGTGGA	ACY1	398.409	442.738	481.363	459.774	485.791	395.814	470.138	478.546	419.155	343.864	500.377	542.165	503.607	576.421	519.757	560.783	629.6	538.211	469.497	491.338	404.199	404.403	432.098	463.488	447.456	430.29	558.159	403.091	428.112	507.198
GPRC6A_TCTTACCTGGAGTCAAACTG	GPRC6A	396.996	395.859	331.298	379.813	301.265	256.515	326.882	380.806	354.576	336.137	278.285	316.375	332.329	250.288	326.155	319.454	297.956	312.041	324.428	498.418	446.108	567.499	257.116	364.527	344.639	356.224	247.075	310.529	273.9	257.98
GRPR_GAGTGCTTACAATCTTCCCG	GRPR	543.927	559.933	526.382	390.475	453.781	490.946	425.859	517.896	515.414	482.956	478.971	492.14	535.561	435.349	656.91	521.721	564.469	522.488	501.808	637.182	577.9	535.07	509.769	541.153	638.73	438.05	546.637	517.549	581.173	471.178
S100A7L2_GCAAAGATGAATATCCCTCT	S100A7L2	209.094	222.671	264.346	141.264	146.867	163.082	201.86	220.867	191.3	177.728	157.873	128.443	187.894	183.545	131.298	161.064	154.967	180.21	140.454	156.464	180.87	152.605	193.73	135.288	160.831	176.349	162.583	91.5664	165.721	131.424
UBA1_CCAGGCAGGTAACCACACCG	UBA1	159.646	82.0367	130.441	83.9587	276.788	304.081	151.069	145.976	60.9236	24.4697	37.4614	37.8569	47.293	66.7435	56.0318	44.9482	74.1147	56.8447	49.4555	41.0628	102.566	27.6596	50.8876	43.8434	40.2078	52.9046	5.12072	22.8916	33.3743	36.9933
C5orf15_GCCAAAGACACTCTAGACAA	C5orf15	320.705	313.823	282.815	277.197	284.319	285.394	313.859	314.799	325.332	280.758	349.64	263.646	231.352	370.123	256.324	264.874	304.694	238.264	416.745	533.109	430.668	561.776	318.271	320.684	326.832	380.207	286.76	294.605	250.883	269.662
LAMA3_TGTGGTCGAGTATTCCACGG	LAMA3	175.187	126.31	173.152	110.612	148.75	137.601	166.697	118.05	151.091	167.425	165.9	183.876	173.834	185.061	206.983	155.714	232.825	180.21	151.663	149.384	152.747	122.084	238.815	215.459	206.209	162.241	93.4532	192.09	262.391	157.708
FAM110C_GATCGCGCCAAGTATGTGCG	FAM110C	186.489	186.21	146.602	239.882	128.038	166.48	182.325	168.824	135.25	158.409	117.736	154.132	129.097	166.859	131.298	133.239	126.519	160.859	99.5703	126.728	133.998	83.9326	84.3663	106.477	116.028	101.577	106.255	128.392	78.257	100.271
FUCA2_TTGGCCTGGTCAAACCACGC	FUCA2	558.055	658.898	639.508	674.335	623.243	698.196	778.787	840.311	560.498	597.577	668.062	700.352	617.365	688.671	584.152	597.704	598.158	619.245	812.389	513.994	723.478	616.142	577.172	667.673	473.304	762.531	678.496	523.521	562.76	741.813
TPPP_AGGCTGTCGCTGGAATCGGA	TPPP	521.322	488.314	498.678	525.075	487.673	536.813	579.532	510.28	314.366	406.971	413.859	411.018	561.125	503.61	471.67	474.632	418.486	418.474	340.254	457.355	450.52	538.885	487.896	564.954	581.291	600.29	368.692	359.299	386.682	364.092
NECAP2_TGAAGTCAAAGGCATCACCT	NECAP2	245.827	256.527	315.137	295.854	327.626	249.72	373.766	379.536	266.846	340.001	273.825	287.983	167.443	209.332	223.291	215.644	271.005	241.893	307.943	334.167	282.884	408.218	363.802	415.886	338.32	322.365	224.032	247.826	255.486	257.98
OR2A7_ACAGAAAGGTCTGCATCATG	OR2A7	731.829	666.711	683.374	570.386	630.774	579.282	640.741	581.363	570.245	546.062	536.947	580.022	580.298	535.465	408.948	499.246	403.513	405.17	474.773	424.788	521.103	382.466	465.13	572.47	639.305	545.27	317.485	273.704	390.134	514.012
UTP3_GGCTGGAATGAAGTACAGAG	UTP3	247.24	212.254	281.661	274.532	316.329	254.816	229.208	270.372	170.586	144.243	136.467	151.428	154.661	128.936	142.588	122.537	129.514	166.906	238.046	215.226	270.201	288.995	135.7	150.32	110.284	103.693	112.656	117.444	248.581	178.152
MAGED4_CAGGCACAGTACGTGCCTTG	MAGED4	206.269	247.412	165.072	194.571	195.823	248.021	216.185	225.945	225.417	257.576	223.876	246.07	355.337	317.032	238.762	218.855	291.218	284.224	223.539	263.369	312.662	314.747	191.498	215.459	234.354	219.378	282.92	211.996	180.682	268.688
WNT6_GCTGGTAGGGTCCATAACCA	WNT6	566.532	429.716	383.243	410.465	547.927	560.595	523.533	437.927	608.018	528.031	468.268	519.18	635.26	500.576	489.232	380.99	468.644	501.927	507.743	732.051	661.166	722.965	536.105	630.093	547.976	680.705	568.4	598.167	528.235	509.145
FFAR2_GGGAGAGCTTGTACTGCACG	FFAR2	101.721	130.217	111.972	137.266	97.9113	76.4448	101.581	74.8918	88.9485	100.455	96.3293	133.851	109.924	78.8787	132.135	69.5627	80.8524	142.717	66.6	106.905	25.9173	70.5797	80.3488	66.3915	93.6268	71.9502	32.0045	105.5	63.2961	87.6157
STK32A_TCTGTTGCAGGTGATAACGC	STK32A	144.105	111.987	145.448	203.9	75.3164	151.191	82.0462	82.5079	108.444	101.743	148.954	143.315	81.8041	125.902	132.971	123.608	107.803	112.48	76.4911	34.691	76.0975	34.3361	144.182	130.278	160.257	159.419	177.945	166.213	145.006	109.033
OR6K2_CAGTTGGGTACATAGCTTGG	OR6K2	371.566	444.04	398.25	457.108	337.041	314.273	378.975	406.193	257.098	284.622	378.182	459.691	352.78	455.069	401.422	445.737	419.235	483.785	319.812	395.053	475.334	406.31	458.435	499.815	384.847	428.88	439.102	484.705	455.732	350.463
ASB1_GCGAGAGGCGTGGTAGACAG	ASB1	666.841	483.105	584.1	539.734	632.657	698.196	698.043	682.912	681.126	598.865	657.358	688.184	636.538	732.661	626.803	610.547	616.125	628.921	818.323	735.591	759.873	919.444	773.134	921.965	721.444	900.083	646.491	725.564	571.967	598.708
CRHBP_AGGGGAAAGCCGGTACCTAG	CRHBP	334.833	502.637	357.848	362.488	355.87	365.236	343.812	349.072	374.071	435.304	284.528	306.911	368.119	332.2	418.147	337.647	332.393	351.954	252.553	251.333	254.21	328.1	350.41	360.769	319.365	380.207	396.856	475.747	339.497	341.701
NME3_AGATTGTGCGGCGCTTCGAG	NME3	210.507	174.491	170.843	166.585	184.525	174.974	170.604	177.709	179.116	130.076	142.71	150.076	113.759	178.994	153.042	107.02	128.016	125.784	198.481	125.312	115.249	109.685	158.019	170.363	233.78	130.498	158.742	188.109	176.078	167.443
DSCAML1_GGTTGCACCACAAATCGAGG	DSCAML1	553.817	582.07	540.234	631.689	559.224	563.993	549.579	572.478	458.146	511.289	403.156	452.931	476.765	559.735	433.201	490.15	458.912	434.197	522.25	763.911	645.175	884.154	536.998	497.31	493.408	519.875	527.434	509.587	470.693	528.615
IL1R1_ATTACAGATCAATTGTATCT	IL1R1	261.368	355.492	266.654	141.264	252.31	253.117	246.138	290.682	268.064	311.667	323.774	282.575	502.328	344.336	312.356	372.963	348.863	305.994	222.879	305.847	210.095	331.915	270.508	279.345	257.905	249.004	422.46	377.214	246.279	255.059
HIC1_CTGTACGTGTGCATTCCGTG	HIC1	512.846	371.118	454.813	645.016	478.259	443.38	479.254	346.533	472.767	576.971	430.806	484.027	522.779	465.687	654.401	582.722	503.081	569.657	383.774	238.589	287.296	204.109	442.365	424.655	444.584	416.888	606.806	600.158	405.095	461.443
RTCA_CGGGTGCAGAAGATCCGAGC	RTCA	560.881	471.385	410.948	507.75	342.689	436.585	444.091	495.047	404.533	439.168	463.808	532.701	470.374	368.606	448.672	407.21	336.136	463.224	441.802	383.725	460.445	465.444	376.747	418.392	438.84	400.664	358.451	410.058	439.62	497.463
GABRG3_CCGCAATTCTAAAACCGCAG	GABRG3	81.9423	55.9933	103.891	99.9508	96.0284	120.613	88.5578	68.545	125.503	144.243	100.789	98.6983	123.984	86.4631	123.353	90.9667	107.803	133.041	73.1941	82.1257	130.689	55.3192	91.9548	85.1816	121.198	78.2987	88.3325	162.232	142.704	144.079
RBMXL3_GGCTGCTACGAGGAGTACCG	RBMXL3	365.915	354.19	248.185	341.165	361.519	368.634	451.905	387.152	391.13	473.94	374.614	277.167	276.089	433.833	321.555	416.306	346.617	399.123	564.452	259.121	397.582	219.369	418.26	309.409	285.476	392.904	381.494	341.383	314.179	335.86
NDUFV3_AGGGGGGCTTCGAAAACCAG	NDUFV3	132.803	144.541	156.991	135.933	216.535	140.998	167.999	200.558	174.242	185.455	145.386	127.091	181.503	183.545	177.294	121.467	168.442	142.717	155.62	186.907	178.664	155.466	159.805	227.986	203.337	178.465	213.79	160.241	177.229	160.629
NDRG4_CTGGTGAACATCGACCCCAA	NDRG4	449.27	299.499	394.787	425.124	440.601	516.427	347.719	489.97	396.004	412.122	445.969	448.875	425.637	406.528	406.857	489.615	512.065	424.521	514.996	615.235	665.578	523.625	434.776	449.709	437.117	396.431	527.434	440.912	407.397	446.84
TAAR1_TTTCTGGAGCTAAACTTCAA	TAAR1	416.775	480.501	365.928	342.498	374.699	387.32	362.045	482.354	447.18	369.622	340.72	421.834	470.374	438.383	505.958	567.204	557.732	449.92	516.315	403.549	518.897	450.184	339.251	392.086	317.068	376.68	572.241	558.356	458.034	426.397
PRPF40B_GTGTCAACTTCCAAACCACG	PRPF40B	282.56	248.714	333.606	302.518	429.303	368.634	338.603	280.527	280.249	343.864	303.259	360.992	339.998	452.035	383.859	342.998	363.087	322.927	245.299	273.988	265.239	301.394	363.802	523.616	342.916	510.705	369.972	451.86	347.553	282.317
CCDC150_CTGCGAGGCAATCTTCAGAG	CCDC150	245.827	243.506	238.95	195.904	233.481	236.13	152.371	149.784	271.719	261.44	199.794	332.6	254.36	254.839	206.983	279.856	255.284	209.237	203.097	210.978	216.713	202.201	267.383	176.626	229.185	247.593	256.036	236.878	299.218	337.807
OR4S2_GTTGTTGTGACAGCCAACAG	OR4S2	166.71	174.491	160.454	175.913	165.696	146.095	179.72	246.254	164.494	218.94	169.468	152.78	155.939	119.835	206.565	215.644	171.437	208.028	222.22	142.304	197.964	143.067	199.979	180.384	168.299	140.373	129.298	139.34	210.603	174.258
ZNF32_TACACATCAACGGATACACA	ZNF32	421.014	402.37	345.15	351.827	308.797	366.935	299.534	359.227	420.373	333.561	453.105	381.273	433.306	474.789	417.729	415.236	364.584	385.819	456.969	469.391	396.479	354.806	417.814	399.602	463.539	478.257	432.701	438.921	365.967	358.251
TOM1L2_GTGCTTGCTCTGATCCAGGT	TOM1L2	490.241	533.889	557.55	646.349	521.566	580.981	484.463	455.697	528.817	522.88	539.623	535.405	456.314	415.63	498.014	458.044	456.666	540.63	445.759	344.078	598.855	349.083	439.687	425.908	479.048	407.012	435.261	403.091	429.263	440.999
IFI27L2_CTGTCTAGGACACTTACCCA	IFI27L2	257.129	269.549	307.056	238.549	291.851	317.671	299.534	258.948	304.618	343.864	280.069	201.453	363.006	310.964	234.163	282.532	303.945	243.102	252.553	383.725	377.731	443.508	215.156	246.776	168.299	229.958	322.606	259.77	295.765	193.728
HPSE_TGGCAATCTCAAGTCAACCA	HPSE	196.379	130.217	171.998	182.577	178.876	156.287	171.906	171.363	180.334	117.197	141.818	183.876	189.172	245.737	161.823	192.1	172.934	183.838	122.65	193.987	236.564	178.357	182.57	210.449	246.991	205.27	222.751	176.166	178.38	259.927
YTHDF2_GAATACTATAGACCAAGGGA	YTHDF2	363.089	445.342	454.813	290.524	489.556	434.886	377.673	396.038	436.213	485.531	288.988	392.089	305.487	394.393	262.178	408.815	335.388	454.758	487.301	357.53	469.82	347.176	368.265	283.103	361.296	354.108	234.273	276.69	272.749	352.41
PRODH_CACCTACTTCTACGCCAATG	PRODH	597.614	363.305	539.08	519.744	434.952	453.573	450.603	531.859	460.583	573.107	454.888	516.476	439.697	461.137	624.712	455.368	585.431	527.326	630.392	596.119	632.492	603.742	447.722	453.467	443.435	416.183	553.038	458.827	590.38	432.238
ESYT1_ACAGTGGGGAGAGACTTATG	ESYT1	593.375	513.055	517.148	566.388	497.088	558.897	561.3	561.054	495.918	506.137	477.187	569.205	430.75	532.431	590.424	619.108	572.704	532.164	488.62	402.841	497.943	551.285	619.132	732.812	630.114	666.597	665.694	628.026	552.402	666.853
UNC45A_GGGTCCTTGAGAGACTTCCG	UNC45A	286.798	157.562	211.246	158.589	233.481	259.912	208.371	210.712	198.611	140.379	164.117	217.677	199.398	229.051	130.88	161.6	105.557	194.723	76.4911	129.56	131.241	105.87	180.785	180.384	152.215	177.054	112.656	78.6277	138.101	207.357
ICOSLG_TCAGCGTGCTGAGGATCGCA	ICOSLG	180.838	122.404	180.078	243.88	114.857	98.5289	171.906	162.477	73.1084	171.288	134.683	193.341	163.608	94.0476	160.15	146.082	106.306	171.744	149.685	169.207	108.081	250.844	140.164	97.7083	106.264	134.73	139.54	160.241	118.536	156.735
DLL1_TGACGAACACTACTACGGAG	DLL1	217.571	183.606	248.185	229.221	220.3	183.468	205.767	250.062	164.494	207.349	145.386	178.468	249.247	171.409	191.093	218.855	184.912	183.838	230.792	208.146	183.075	137.344	230.333	240.513	222.866	311.079	249.635	215.977	218.659	227.801
RAD9A_GTATTGCTGGAAGAAGAGCG	RAD9A	146.931	156.26	145.448	71.9646	216.535	208.949	170.604	166.285	147.435	79.8486	74.9228	133.851	60.0749	60.6759	54.3592	84.5455	92.8305	52.0069	44.1802	17.6995	72.2375	13.3529	85.7054	73.9075	165.427	38.0913	19.2027	11.9434	104.726	88.5892
EPS8_AATAAAAAGATTATCCACAG	EPS8	170.949	140.634	146.602	74.6299	163.813	151.191	101.581	128.205	182.771	191.894	158.765	151.428	130.375	138.038	138.407	202.267	154.218	247.94	352.782	444.612	333.065	514.087	228.994	156.584	159.683	134.025	235.553	255.789	214.056	281.344
FAM184B_AGTGAAGCGACTAGAAGACT	FAM184B	227.46	157.562	217.017	190.573	244.778	293.888	234.418	224.675	190.082	252.425	190.875	147.371	198.119	280.626	235.835	253.636	239.563	268.501	180.677	321.423	193.001	269.92	241.939	248.029	207.932	235.602	279.079	378.209	324.536	193.728
SLC44A2_CCTTGTAGGCGTGGATAGCG	SLC44A2	223.222	239.599	189.313	283.86	212.769	156.287	216.185	194.211	201.048	194.47	233.688	266.35	228.796	265.457	194.02	209.758	233.574	229.798	203.097	194.695	296.67	262.289	180.785	144.057	175.191	251.826	272.678	210.005	242.827	223.907
OR4K15_CGAGCACAACACATACACGA	OR4K15	203.443	220.067	168.535	198.569	163.813	171.576	175.813	130.743	179.116	119.773	103.465	156.836	141.879	107.7	127.117	152.503	113.792	154.811	107.483	41.7708	89.8833	44.8276	211.585	184.142	122.347	177.759	117.777	142.326	151.911	180.099
LMO7_TTTAGGACAAGCACTGACGA	LMO7	217.571	166.678	200.856	230.553	158.164	180.07	187.534	215.79	154.746	202.197	140.034	236.606	253.081	324.616	160.569	193.17	184.912	177.791	154.301	225.138	218.367	232.722	184.356	211.701	143.025	162.946	268.838	217.968	66.7486	181.073
MDK_TCCGCGGTCGCCAAAAAGAA	MDK	269.844	225.275	242.413	173.248	306.914	195.359	299.534	274.18	281.467	425.001	343.396	347.472	355.337	386.809	296.885	253.101	357.847	358.001	205.075	123.897	288.399	184.079	211.139	219.217	210.23	158.008	216.351	305.553	302.671	241.43
CC2D1B_ACGGATTCACAACTACCGAG	CC2D1B	428.078	454.457	500.987	485.095	585.585	479.054	576.928	492.509	534.91	448.183	535.163	411.018	434.584	324.616	418.147	325.875	388.541	349.535	407.513	412.752	559.152	450.184	376.747	394.591	403.227	405.602	396.856	391.148	460.335	428.344
OR52E2_ATCTTCTGGATCAACCTCAG	OR52E2	278.321	372.42	292.05	319.843	316.329	270.105	300.836	340.186	282.686	330.986	395.129	365.049	323.382	306.413	337.027	336.042	299.453	359.21	377.84	367.442	426.257	374.835	341.929	354.506	338.895	383.029	380.214	312.52	391.285	329.046
SCAPER_AATTGCTAGATCAACGACGC	SCAPER	105.96	82.0367	92.3478	162.587	156.281	78.1436	87.2554	77.4305	123.066	113.334	190.875	132.499	122.706	130.453	163.077	103.274	158.71	124.575	144.41	104.073	108.632	110.638	112.488	151.573	87.8829	133.319	78.091	106.496	124.291	147.973
SLC35B4_TCACTATACAGGAAGCATCC	SLC35B4	429.491	457.061	379.78	433.12	406.708	361.839	485.765	418.886	477.641	513.865	347.856	438.058	394.961	543.049	409.784	484.264	480.622	587.799	351.464	627.978	390.965	755.393	454.417	453.467	368.189	445.104	375.093	543.427	536.291	604.549
ANLN_ATTGGCACAAACAGTTGGTG	ANLN	442.206	501.335	466.356	446.447	423.655	372.032	544.37	580.094	437.432	440.455	518.216	519.18	447.366	465.687	597.951	629.81	502.333	683.346	470.816	412.752	503.457	442.554	490.574	468.499	454.923	471.203	522.314	852.961	583.475	579.237
USP31_GACGGCCCTATGGACTCGGG	USP31	161.059	106.778	118.898	103.949	167.579	147.793	147.162	112.972	134.032	117.197	99.8971	110.867	163.608	124.386	130.044	124.678	113.044	118.527	147.707	100.533	108.632	165.004	135.7	107.73	203.911	135.436	103.695	146.307	108.179	96.3773
HACD4_TGTGGTGATCACCAGTCAAG	HACD4	105.96	175.793	173.152	82.626	107.326	132.504	122.418	130.743	98.6963	148.106	155.197	181.172	86.9169	110.733	158.06	167.486	210.366	158.44	143.091	184.783	138.409	152.605	139.271	161.594	155.662	133.319	153.622	226.925	222.112	246.298
PSMB5_CCGCTACCGGTGAACCAGCG	PSMB5	435.142	375.025	415.565	414.463	468.844	436.585	423.254	360.496	287.56	195.758	291.664	275.814	262.029	248.771	169.768	174.977	245.552	211.656	145.069	151.508	214.507	107.777	217.388	264.313	249.289	193.278	75.5307	100.524	187.587	130.45
MYOT_GTGATGGTAATATGGAGCTG	MYOT	525.561	415.392	424.8	417.128	389.762	485.849	395.905	432.849	389.911	390.228	544.082	498.9	361.728	408.045	342.463	431.289	412.497	417.265	432.571	431.16	325.345	437.785	368.265	417.139	377.379	368.921	418.619	372.237	435.017	426.397
TMEM225_CATTAAGACTACGGCCCAGG	TMEM225	313.641	195.325	187.004	255.874	222.183	203.853	291.72	310.991	242.476	206.061	295.232	206.861	262.029	286.694	325.319	243.47	279.989	176.582	391.028	378.061	298.876	230.815	298.183	251.787	273.413	328.008	206.109	202.043	284.257	301.788
KRTAP12-2_GCAGCCCACAGGCACACAGC	KRTAP12-2	486.003	587.278	515.993	625.026	427.42	497.741	467.533	448.081	419.155	463.637	573.516	578.67	400.073	488.441	531.047	505.133	550.994	520.069	338.935	269.74	391.516	401.541	543.247	464.741	492.259	493.07	496.71	619.068	637.565	568.529
MRPL54_GTTGACGCCCATGGCATATG	MRPL54	358.851	317.729	360.156	346.496	367.167	334.658	333.394	316.069	358.231	330.986	324.665	348.824	325.938	250.288	305.248	232.768	226.087	193.514	170.786	46.7267	188.038	61.9957	320.056	344.484	354.403	270.871	104.975	85.5947	363.665	290.105
PARN_GCTACGATGCCTACATCACA	PARN	189.315	196.628	243.567	189.24	235.364	188.564	174.511	120.588	221.762	144.243	205.146	141.963	169.999	119.835	206.147	207.618	175.929	169.325	184.634	193.987	244.284	146.882	163.822	137.794	160.257	155.892	128.018	130.383	161.117	215.145
DOPEY2_CAACCCTAAGGAATTCATCG	DOPEY2	267.019	194.023	264.346	307.849	250.427	219.142	295.627	363.035	247.35	239.546	315.746	312.319	274.811	241.187	302.739	226.882	246.3	235.845	245.299	219.474	234.91	225.092	393.709	345.737	385.421	335.768	256.036	260.765	290.011	220.013
C9orf47_CAGGCTTGGAACCAGGTCCG	C9orf47	299.513	334.658	287.432	354.492	318.212	411.103	325.58	340.186	341.172	361.895	412.075	296.095	448.644	415.63	319.046	371.893	460.409	449.92	335.638	606.739	453.277	568.453	424.51	348.242	371.635	378.797	305.963	362.284	346.402	436.132
SERPINA9_AAGTGCCCTCTTCGTCAAGA	SERPINA9	788.341	760.467	821.895	787.612	847.309	720.28	744.927	764.15	749.361	817.805	1080.14	1142.47	954.807	957.162	906.125	1065.92	1054.08	1078.84	1077.47	1038.61	1258.37	1121.64	980.256	934.492	967.286	782.282	910.208	906.706	965.553	979.349
FFAR3_GGCCGGGTCTTGTACCACAG	FFAR3	298.1	213.556	267.809	286.526	291.851	232.732	277.394	262.756	343.609	292.349	246.175	269.054	235.187	221.467	258.415	270.224	253.787	302.366	240.024	400.717	362.29	480.705	252.652	197.922	229.759	258.88	343.088	354.322	253.184	285.238
PSMC3_GTTGGAGACAAGGTACGGCA	PSMC3	162.472	123.706	163.917	223.89	207.12	261.611	174.511	187.864	77.9823	64.3941	49.0566	47.3211	19.1728	18.2028	30.1066	25.1496	54.6502	25.3987	26.3763	0.70798	24.263	0	55.7978	33.8221	68.9277	66.307	7.68108	18.9104	31.0726	28.2317
EDN3_CACTGCAGCCAGATCTGAGG	EDN3	727.591	596.394	537.926	714.315	664.667	676.112	694.137	665.141	694.53	685.153	567.273	692.24	659.546	717.492	610.077	719.707	543.508	593.846	597.422	730.636	586.723	739.179	597.706	647.63	508.916	617.22	649.052	722.578	585.777	555.873
NAT8_CCTTGCCAAAAAACCCTGGA	NAT8	158.233	195.325	165.072	183.91	148.75	156.287	144.558	173.901	138.906	114.621	255.094	170.356	138.044	185.061	228.308	215.109	184.912	175.372	127.265	132.392	102.566	126.853	184.802	151.573	142.451	217.967	253.476	116.449	194.492	177.178
CT83_TTCTGCCTGGCTATTGAGTG	CT83	378.63	457.061	399.404	485.095	387.879	451.874	403.719	482.354	375.29	570.531	528.919	574.614	438.419	587.039	496.759	527.607	496.344	528.535	588.19	898.427	625.875	1032.94	444.15	521.111	473.878	536.805	565.84	693.715	451.129	419.582
NNMT_ACTAATCCAGACGGTGTGAA	NNMT	245.827	233.088	226.252	207.898	244.778	219.142	243.534	275.449	246.132	211.213	294.34	338.008	230.074	250.288	238.344	240.794	249.295	280.595	198.481	200.358	218.367	174.542	237.922	259.303	322.812	286.39	323.886	277.685	265.844	296.92
ATP6V1B1_CCTCTGACACCGGAGTTCGT	ATP6V1B1	132.803	184.908	213.554	158.589	141.218	154.588	181.022	224.675	180.334	190.606	123.087	163.596	149.548	116.801	135.898	188.89	154.967	142.717	242.662	236.465	268.547	247.983	150.877	189.153	223.441	198.921	133.139	168.203	131.196	156.735
C17orf59_CAAAGTGGGTAAGGTCGCCG	C17orf59	166.71	164.073	106.2	142.597	112.975	96.8301	66.4183	119.319	95.0409	155.834	109.708	127.091	54.9621	168.376	127.117	114.511	101.814	194.723	85.7228	118.233	50.7317	156.42	135.254	187.9	117.177	176.349	87.0523	206.024	123.14	118.768
DENND6B_ACGTAGCCGAAGTAGTGTGC	DENND6B	449.27	304.708	462.893	370.484	316.329	309.177	364.65	417.617	396.004	458.486	276.501	356.936	460.148	356.471	378.842	379.384	422.978	332.602	226.176	289.564	302.736	305.209	375.854	326.947	295.24	344.232	322.606	321.478	418.905	476.046
ZAK_GTGACAATGCCATAGTTGGG	ZAK	466.223	417.996	408.639	607.701	431.186	482.452	613.393	555.976	449.616	356.743	504.837	521.884	590.523	452.035	553.627	534.028	631.846	559.981	524.228	487.798	436.182	367.205	489.681	601.282	538.785	512.116	629.849	531.483	539.743	446.84
PAM_ACAGACTAGTATCTACCTTG	PAM	641.41	588.581	589.871	602.37	551.692	557.198	566.509	614.367	610.455	655.532	621.681	657.087	570.072	561.252	500.941	538.309	488.857	423.312	490.598	537.357	590.032	495.012	549.497	643.872	518.681	672.946	518.473	540.441	407.397	417.635
DEFB121_AACTGAGGCTAAGTGCTGTG	DEFB121	416.775	563.839	413.256	453.11	303.148	406.007	467.533	408.731	397.222	414.698	409.4	356.936	375.788	411.079	629.73	539.914	412.497	457.177	374.543	334.875	265.79	382.466	369.158	394.591	447.456	491.66	433.981	450.865	397.039	440.999
PAPPA2_GTGAGAATGTGTCACCACCA	PAPPA2	357.438	356.794	368.237	243.88	310.68	288.792	369.859	365.573	287.56	309.092	357.667	400.201	430.75	455.069	320.301	341.393	369.076	297.528	338.935	477.179	413.022	401.541	382.103	397.096	448.03	390.083	263.717	284.652	385.531	344.622
AP4S1_TTCTAAGTACTATGAACATG	AP4S1	295.275	319.032	238.95	269.201	288.085	275.201	251.348	232.291	257.098	296.213	275.609	210.917	247.969	235.119	344.972	232.768	288.972	320.508	205.735	294.52	172.598	318.562	354.874	299.388	265.946	328.714	263.717	231.902	256.637	285.238
FABP2_ACAGCACTTGGAAGGTAGAC	FABP2	165.297	167.98	169.689	243.88	173.228	188.564	197.953	157.4	231.51	269.167	153.413	196.045	227.518	251.805	177.294	248.285	211.115	210.446	214.966	300.892	234.358	227.953	233.904	187.9	253.884	219.378	245.795	255.789	189.888	148.947
RIT2_ATGCGGGAGCAGTACATGCG	RIT2	243.001	153.656	258.574	230.553	242.895	210.648	199.255	209.443	280.249	190.606	200.686	208.213	180.225	300.346	277.65	281.997	256.781	269.71	295.414	355.406	259.724	361.482	300.415	279.345	241.247	328.008	235.553	199.057	247.43	194.702
TRAF6_TGAGCGTTATACCCGACTCT	TRAF6	162.472	190.117	205.474	235.884	133.687	154.588	220.092	211.982	197.393	133.94	154.305	135.203	116.315	197.197	159.732	140.196	190.153	135.46	119.353	60.8863	76.0975	53.4117	203.55	159.089	144.174	180.581	153.622	177.161	185.285	154.788
CERS2_TCTGATGTCAAGCGAAAGGT	CERS2	79.1167	140.634	90.0391	105.282	114.857	110.42	88.5578	60.9289	101.133	68.2577	99.0051	124.387	76.6914	128.936	79.8662	72.2382	100.317	79.8245	34.2891	89.9135	33.0859	62.9495	90.6156	48.8541	118.9	47.9668	47.3667	59.7172	81.7095	81.7747
MAFF_TCTCCGCCGAGGAGGTGACA	MAFF	8.47679	0	0	0	1.88291	3.39755	0	0	0	0	1.78388	1.35203	0	0	0	2.67549	2.2459	0	0	0	0	0	0.892765	0	8.04157	0	0	0	4.60335	3.89403
TM6SF1_GATGGTGGCAGCCATAGCAT	TM6SF1	14.128	19.5325	2.30869	23.9882	0	1.69877	1.30232	0	9.74778	6.43941	0	1.35203	5.11276	7.58449	4.59962	3.21059	2.2459	13.3041	0	0	0	0	0	0	0	0	0	6.96701	0	4.86754
ANGPT1_AGATATAACCGGATTCAACA	ANGPT1	709.225	645.876	616.421	462.439	745.632	674.413	506.602	698.144	816.377	855.153	796.501	663.848	633.982	652.266	755.174	759.304	753.874	788.57	1074.17	1173.12	921.993	1011.01	654.843	701.495	661.132	694.813	810.354	997.277	814.794	783.674
C1orf229_CGAAAATCCTCCACATCCTG	C1orf229	258.542	225.275	275.889	286.526	286.202	281.996	330.789	234.83	311.929	249.849	238.147	283.927	232.63	301.863	253.397	257.382	238.065	211.656	278.269	204.606	252.556	279.457	259.795	329.452	302.133	277.22	245.795	188.109	197.944	234.615
EHD3_GAAGATCGTGAACACCCCAG	EHD3	217.571	235.693	221.635	163.919	133.687	181.769	165.395	139.629	177.897	186.743	201.578	173.06	93.3078	165.342	231.654	153.038	157.213	152.392	181.337	394.345	135.101	274.689	141.95	164.1	174.043	126.266	158.742	222.944	159.967	169.39
CASK_GCTGCTATGACCATTAGCTG	CASK	288.211	291.686	289.741	329.171	303.148	321.068	229.208	351.611	331.425	372.198	278.285	302.855	297.818	342.819	360.861	322.129	369.825	275.757	391.028	303.723	494.083	261.336	369.605	378.306	382.549	342.116	528.715	525.511	360.212	485.781
FRG2B_CTCTGACATAGCTCGCACAG	FRG2B	142.693	75.5258	116.589	122.606	122.389	113.818	121.116	153.592	86.5116	132.652	132.899	160.892	117.593	115.284	92.4106	69.5627	93.5791	89.5002	56.7089	48.8506	35.843	42.9201	76.7778	115.246	101.094	109.336	130.578	71.6606	105.877	92.4833
ZNF346_GAAAAGGTCATGTTACAGAT	ZNF346	416.775	510.45	427.108	389.142	421.772	524.921	488.37	492.509	483.734	363.183	490.566	501.604	424.359	464.171	492.578	447.877	497.092	497.089	540.713	550.101	520.551	640.94	465.13	448.456	506.045	477.552	476.227	488.686	555.855	361.172
ADAMTSL3_CCTTGCACAGCAACATGCGT	ADAMTSL3	207.681	191.419	259.728	201.234	205.237	225.937	252.65	210.712	151.091	222.803	239.931	228.493	139.323	195.68	193.184	162.67	197.639	233.426	265.741	225.138	264.136	276.596	144.182	219.217	167.15	210.207	147.221	361.289	277.352	186.914
KIT_TCTAGTGCATTCAAGCACAA	KIT	329.182	378.931	333.606	295.854	306.914	395.814	286.51	398.577	422.81	499.698	391.561	504.308	369.397	441.417	402.676	330.691	398.273	389.447	325.087	361.778	345.748	385.327	395.941	419.644	425.629	419.709	367.412	399.11	374.022	297.894
TMEM248_CTGATCATGAAGACCACCAG	TMEM248	481.764	410.183	415.565	411.797	433.069	370.333	477.951	404.923	414.281	381.213	526.243	511.068	391.126	453.552	393.059	384.735	434.956	380.981	323.768	334.167	377.179	363.39	345.5	328.2	380.251	326.597	414.779	430.959	313.028	415.688
EARS2_GGACGGCGCGAGGCCAACCT	EARS2	97.4831	204.441	129.287	154.591	256.076	227.636	252.65	171.363	386.256	117.197	159.657	95.9943	167.443	103.149	169.35	150.898	172.186	133.041	168.808	90.6215	140.615	110.638	141.503	97.7083	169.447	75.4772	64.009	81.6135	200.246	207.357
L1TD1_TCACGAAGTTACGAAGTCAT	L1TD1	227.46	252.621	309.365	293.189	288.085	263.31	238.325	184.056	294.87	349.016	289.88	225.789	207.067	174.443	295.212	291.628	333.89	298.737	348.826	256.997	356.225	260.382	293.273	200.427	237.226	255.353	340.528	393.138	309.576	319.311
NRTN_GTCCATCTGGATGTGTCGAG	NRTN	292.449	261.736	304.748	331.837	267.373	321.068	346.417	279.258	188.863	222.803	279.177	294.743	361.728	294.278	308.175	258.987	295.71	264.872	178.04	298.768	309.904	361.482	216.942	246.776	274.562	241.245	203.549	316.501	226.715	221.96
FAM131B_GCCATCGCTGAGGTCGGAGT	FAM131B	66.4015	63.8063	65.7978	58.6378	111.092	100.228	130.232	149.784	102.352	121.061	110.6	89.2341	81.8041	106.183	83.2113	75.9839	92.8305	62.8921	87.0416	181.243	145.026	252.752	47.7629	83.9289	85.0109	80.4149	121.617	64.6936	105.877	111.953
PIK3R4_ACTGGCAAATTCGTAAACAT	PIK3R4	293.862	343.773	382.089	251.876	321.977	383.923	312.557	432.849	307.055	611.744	274.717	488.083	213.458	317.032	211.164	544.195	251.541	530.954	244.64	618.067	114.146	489.289	349.517	459.73	340.618	507.178	179.225	246.831	199.095	898.548
LUZP6_AGCTTCAGACTGTTATCTAT	LUZP6	891.476	983.138	856.526	555.727	743.749	822.207	739.718	903.779	895.578	918.259	934.751	980.223	887.063	940.476	1051.64	983.51	1006.91	1011.11	793.266	809.929	754.91	746.809	879.373	895.659	885.721	863.402	955.015	1134.63	882.693	1139.98
CD48_TCACTTGGTACATATGACCG	CD48	418.188	347.679	499.832	397.138	510.268	492.644	553.486	454.428	353.357	372.198	435.266	452.931	472.93	526.363	485.051	501.922	504.579	442.663	472.135	337.707	498.494	418.709	562.888	538.648	657.686	541.037	515.913	526.507	508.671	488.701
VPS36_CCAGTTACCAGAGAAACCTA	VPS36	227.46	352.888	245.876	257.207	431.186	271.804	303.441	399.846	285.123	265.304	340.72	490.788	233.909	420.181	160.987	392.762	184.912	403.961	121.99	178.411	100.361	160.235	196.855	310.662	210.23	299.792	177.945	145.312	294.615	428.344
KRT33A_CTTGGTCCTGAAGTCATCTG	KRT33A	302.339	279.966	257.419	357.158	222.183	287.093	272.185	251.332	196.174	225.379	399.588	355.584	290.149	265.457	335.354	338.182	309.934	281.805	371.246	352.574	465.408	426.339	184.356	225.481	215.399	210.913	232.993	218.963	338.347	309.576
HP_TAGCCATGTGCAATCTCGGG	HP	162.472	117.195	140.83	137.266	171.345	120.613	205.767	176.44	158.401	207.349	128.439	201.453	129.097	165.342	192.348	219.39	190.153	164.487	203.757	126.728	231.05	96.3317	106.239	115.246	130.963	81.1203	153.622	91.5664	78.257	124.609
KCNK4_ATATAGCAGAACACGAACGT	KCNK4	278.321	492.22	154.683	278.53	267.373	239.527	156.278	204.366	186.426	168.712	151.629	202.805	164.886	189.612	199.456	210.294	151.973	174.163	303.986	285.316	331.41	357.667	254.438	241.765	264.223	203.153	153.622	182.137	304.972	231.695
AQP11_CCCAGTATCACGTCAGCGAG	AQP11	498.718	403.673	520.611	653.012	632.657	603.065	591.253	581.363	610.455	481.668	572.624	592.19	549.621	435.349	646.456	695.627	616.874	705.117	540.054	545.853	603.817	551.285	574.048	587.502	561.761	525.519	599.125	384.181	461.486	607.469
PHF21A_ACGTGGAGTGAGTCTAGGAG	PHF21A	185.077	203.138	212.4	122.606	173.228	173.275	175.813	142.167	213.233	193.182	186.415	144.667	135.488	160.791	110.391	116.116	96.5737	94.3381	157.598	152.924	150.541	178.357	129.451	101.466	145.323	147.427	179.225	164.222	151.911	145.053
CHRM4_CGTCAAGAAGCCCCCGCCCG	CHRM4	298.1	382.838	492.906	395.805	410.474	395.814	350.324	338.917	403.315	403.107	356.775	417.778	313.156	365.572	382.605	341.393	324.907	389.447	314.537	305.847	271.856	416.802	312.914	414.634	344.064	381.618	386.615	531.483	360.212	328.072
METTL17_AAAAAATTCCTGGAAAACCC	METTL17	129.977	126.31	116.589	54.6398	195.823	107.023	106.79	134.551	134.032	124.924	150.738	98.6983	134.21	75.8449	151.369	134.31	121.279	146.345	46.8178	19.8234	54.0403	36.2436	121.416	92.6976	89.0317	62.7801	79.3712	20.901	107.028	116.821
TEF_CATCCACTTCCACACAATTG	TEF	122.913	165.376	158.146	150.593	195.823	207.25	257.859	190.403	226.636	94.0153	152.521	123.035	214.736	153.207	110.391	133.775	135.503	128.203	132.541	94.8693	142.269	98.2393	202.658	220.47	233.206	149.544	113.936	163.227	123.14	200.543
ACTN4_ACTCCCACAATGTCAACACC	ACTN4	395.583	565.142	383.243	501.087	476.376	439.982	537.858	357.957	422.81	486.819	465.592	400.201	476.765	394.393	405.603	545.8	437.202	527.326	522.25	496.294	534.889	578.944	444.597	499.815	445.158	493.776	524.874	476.742	431.564	461.443
TMEFF1_AGCGGCGGGGACTGTCCCGG	TMEFF1	148.344	88.5475	95.8108	99.9508	105.443	115.517	127.627	126.935	109.663	100.455	108.816	93.2902	108.646	168.376	79.0299	75.9839	116.038	93.1286	84.404	92.7454	125.726	118.269	45.9774	83.9289	80.9901	72.6556	130.578	88.5805	123.14	90.5363
SPAG17_ACACCTGAAGGAAATCGGAT	SPAG17	543.927	553.422	656.824	570.386	611.945	618.354	587.346	639.754	633.606	546.062	711.767	575.966	828.267	773.618	659.837	568.274	598.158	544.258	730.622	509.038	704.178	571.314	776.259	579.986	642.177	655.311	600.405	683.762	612.246	569.502
GALNT8_CAGGAGACACAATCACAGTG	GALNT8	692.271	811.252	633.737	683.664	694.793	808.616	655.067	808.577	848.057	907.956	758.147	692.24	828.267	706.874	749.32	711.68	686.497	699.069	809.092	870.108	914.825	931.843	662.878	904.428	716.274	919.128	816.755	708.644	790.626	870.316
Non-Targeting_GAATCGACCGACACTAATGT	Non-Targeting	786.928	807.345	796.5	918.215	817.182	808.616	820.462	811.116	1058.85	955.608	859.828	762.546	1137.59	990.534	979.719	1102.3	1014.4	1249.37	1177.04	1060.55	1171.24	1220.84	723.586	916.954	884.573	886.68	1205.93	1190.36	890.749	1019.26
C3orf52_GAGCTCCTGTAATAAGAATG	C3orf52	296.688	389.349	253.956	201.234	350.221	338.056	226.604	327.493	303.4	316.819	343.396	290.687	239.021	238.153	372.987	393.832	363.087	384.609	365.97	513.994	387.656	441.6	331.662	299.388	334.3	344.232	321.325	324.463	340.648	340.728
CACNA2D4_CCACGACATCATCTGGACAG	CACNA2D4	630.108	865.943	798.808	772.953	743.749	772.942	862.136	778.113	827.343	824.244	783.122	751.73	934.356	875.25	916.579	962.641	889.376	822.435	939.654	760.371	913.722	784.961	727.603	836.784	817.368	847.884	1013.9	935.57	896.503	686.323
TEX43_CTTAGCAAGCAGAAGTGTGT	TEX43	137.041	108.08	77.3413	86.624	139.335	103.625	91.1624	90.124	93.8224	137.803	129.331	124.387	117.593	125.902	116.663	136.45	109.3	112.48	174.743	121.065	167.084	135.437	117.399	70.1495	84.4365	112.863	166.423	125.406	115.084	110.98
CLEC2A_GATGGCTTCATACATCGGAT	CLEC2A	507.194	533.889	594.489	533.071	538.512	540.21	578.23	575.017	406.97	604.016	517.324	479.971	540.674	577.938	565.753	645.328	524.792	656.738	398.941	375.937	443.351	420.617	525.392	628.84	525	477.552	473.667	576.271	524.782	610.39
KLHL30_ACTTCCCCGACTATCACAAG	KLHL30	262.78	236.995	211.246	199.902	220.3	237.828	225.301	190.403	263.19	177.728	289.88	312.319	325.938	276.075	180.222	252.566	232.076	263.663	219.582	222.306	249.798	256.567	268.722	294.377	203.337	282.863	211.23	140.335	241.676	166.47
LYZ_AGCCGCTACTGGTGTAATGA	LYZ	155.408	261.736	245.876	242.547	338.924	249.72	225.301	187.864	248.568	211.213	246.175	183.876	232.63	297.312	254.234	257.917	247.798	255.197	320.471	256.997	222.227	176.449	228.101	214.207	198.167	259.585	305.963	326.454	276.201	255.059
NPIPB5_AGATTATCATCCGCTCAGGG	NPIPB5	296.688	307.312	234.332	166.585	318.212	314.273	319.068	304.645	325.332	265.304	247.067	197.397	281.202	239.67	276.814	281.462	296.459	291.48	133.859	203.19	157.158	139.252	320.949	182.89	299.261	184.108	295.722	364.275	355.609	279.397
NR2F6_GCGGCGGAGACCTCTTCCCG	NR2F6	278.321	292.988	237.796	226.555	335.158	312.574	234.418	200.558	224.199	222.803	204.254	183.876	204.51	207.815	204.474	188.89	232.076	209.237	121.331	125.312	114.146	150.697	259.348	224.228	214.25	292.739	198.428	181.142	212.905	234.615
SYTL2_TGACAACTCTCTTACCAGCA	SYTL2	300.926	276.06	230.869	146.595	241.012	241.226	238.325	224.675	259.535	285.91	186.415	178.468	240.3	212.366	224.963	224.741	260.524	247.94	181.996	220.182	153.849	169.773	215.603	305.651	227.462	243.361	216.351	255.789	356.76	214.172
PBK_TGTCTTGCTATGGAATATGG	PBK	244.414	186.21	193.93	258.539	256.076	208.949	179.72	321.146	274.156	276.894	217.633	224.437	250.525	301.863	272.632	221.531	272.502	309.622	176.061	91.3294	124.072	82.9788	241.939	185.395	211.953	263.817	289.321	207.02	225.564	254.086
ZNF106_CTGGGCTCAAGCCAACCCTA	ZNF106	206.269	170.584	132.75	131.935	150.633	132.504	175.813	135.821	153.528	167.425	129.331	154.132	219.849	236.636	155.133	162.135	158.71	137.879	202.438	360.362	249.798	335.73	181.231	212.954	225.738	234.191	131.859	100.524	151.911	149.92
ZNF568_GTAACAATGTCTGAACTCAG	ZNF568	258.542	174.491	213.554	145.262	207.12	169.877	191.441	191.672	174.242	185.455	255.094	189.284	189.172	194.163	224.127	171.231	168.442	185.048	255.85	199.65	140.064	143.067	226.762	211.701	201.614	210.207	294.442	239.864	184.134	188.861
TLK1_GATTTACTGGAGTTGCAAGT	TLK1	433.729	347.679	402.867	313.179	453.781	422.995	319.068	393.499	388.693	345.152	464.7	402.905	483.156	518.779	453.272	364.937	478.377	410.008	400.919	481.427	370.562	360.529	462.452	369.538	468.709	471.203	431.421	396.124	440.771	457.549
PRTG_GCTTACAACAACATAGACGA	PRTG	243.001	342.471	271.272	227.888	293.734	355.044	405.022	324.954	288.778	303.94	235.472	271.758	339.998	389.843	265.105	275.04	478.377	304.785	400.919	465.851	507.868	466.398	370.497	280.598	318.216	333.651	256.036	313.515	315.33	467.284
CNTN2_GCACTACCGGAGAACTAATG	CNTN2	110.198	66.4106	166.226	142.597	171.345	140.998	153.674	185.325	158.401	128.788	141.818	152.78	169.999	212.366	203.22	183.004	163.951	163.277	366.63	345.494	332.513	382.466	113.828	81.4235	113.156	130.498	88.3325	125.406	145.006	183.993
HTATIP2_CCTTGCCTAGAATCAAGAAG	HTATIP2	300.926	253.923	331.298	337.167	355.87	358.441	312.557	284.335	359.45	406.971	391.561	286.631	522.779	470.238	476.688	414.701	455.918	459.596	482.685	372.398	440.594	495.012	382.55	402.107	399.207	422.531	343.088	320.482	352.157	319.311
NAA60_AGCTACTATCATTCCCACAA	NAA60	210.507	204.441	162.763	139.931	186.408	152.89	188.836	177.709	215.67	181.591	218.525	139.259	210.901	206.298	202.801	184.609	181.918	146.345	154.96	72.214	166.532	80.1175	300.862	210.449	210.804	212.324	115.216	160.241	174.927	174.258
UCP1_GGGCGGATGAAACTCTACAG	UCP1	141.28	136.728	160.454	79.9607	137.452	115.517	177.116	143.437	134.032	142.955	152.521	124.387	145.714	177.477	145.933	142.336	162.453	192.305	137.157	191.863	158.812	165.958	144.182	129.025	126.942	197.51	192.027	204.034	161.117	138.238
HUWE1_ATTCTATGCCACATCCTCCG	HUWE1	384.281	255.225	296.667	201.234	410.474	355.044	299.534	262.756	252.224	164.849	225.66	239.31	132.932	317.032	262.178	215.644	256.033	146.345	162.214	92.7454	188.038	92.5166	353.535	270.577	308.452	299.792	152.341	37.8209	261.24	169.39
NPPB_CCTCGGACTTGGAAACGTCC	NPPB	118.675	149.749	114.28	174.581	146.867	139.299	138.046	215.79	138.906	115.909	132.899	173.06	159.774	113.767	77.7754	85.0806	74.1147	82.2435	103.527	127.436	109.735	116.361	164.269	145.31	107.412	157.303	166.423	148.298	130.045	76.9071
HARBI1_GGTGGTTGACTGTATCCATG	HARBI1	313.641	335.96	292.05	279.862	306.914	288.792	238.325	286.874	319.24	319.395	264.014	383.977	336.164	204.781	311.102	290.023	261.273	301.156	250.574	245.669	201.824	185.987	333.448	352	375.082	222.905	349.489	275.694	333.743	276.476
TUBGCP3_GATACAAAGTCGTAGCTGGA	TUBGCP3	265.606	299.499	342.841	285.193	338.924	339.755	270.883	297.028	265.627	197.046	142.71	187.932	282.48	230.568	157.642	189.96	168.442	172.953	106.164	96.2853	130.138	100.147	287.917	146.562	144.748	167.884	66.5694	32.8445	103.575	95.4038
USP36_CAGGTTGGATCGTCAAACGC	USP36	74.8783	78.1302	101.583	59.9705	122.389	84.9387	91.1624	129.474	88.9485	25.7576	65.1115	87.8821	92.0296	63.7097	66.4854	36.9218	62.8852	38.7028	24.398	12.0357	41.3574	36.2436	34.3714	10.0214	35.6127	20.4564	17.9225	45.7832	135.799	64.2515
Non-Targeting_TTGCAATGCTGCTATAGAAG	Non-Targeting	724.765	713.589	621.039	688.994	546.044	519.825	533.951	676.565	679.908	651.668	846.449	815.275	621.2	638.614	833.368	699.373	831.731	880.489	628.414	521.073	692.598	593.251	793.222	860.584	776.586	771.701	844.919	803.196	700.861	696.058
ZNF646_GGCAAGACCTATCGCCATGG	ZNF646	226.048	157.562	160.454	177.246	214.652	169.877	141.953	175.171	226.636	146.818	201.578	173.06	148.27	177.477	191.93	214.039	185.661	220.122	240.024	216.642	272.407	234.63	169.179	167.858	137.281	144.606	229.152	208.015	196.793	170.364
LHX1_TCTCCGCACCAGGTCGCTAG	LHX1	1.4128	3.90651	0	0	0	8.49387	0	0	0	0	0	0	0	0	0	0	0	0	0	0	0	0	0	0	0	0	0	0	3.45252	0
RASL10A_GATGTCGTAGACGAGCACGA	RASL10A	245.827	273.456	267.809	278.53	291.851	246.322	317.766	304.645	302.181	332.273	219.417	308.263	237.743	162.308	272.214	245.61	217.852	229.798	293.436	254.165	240.976	231.768	241.046	251.787	392.314	265.228	280.36	172.185	232.469	248.245
UTRN_AATAGCATACCTCTAGCGTG	UTRN	570.77	765.676	618.73	719.646	647.721	698.196	698.043	715.915	720.117	726.365	647.547	685.48	699.17	676.536	754.756	689.206	699.972	693.022	672.594	611.695	668.335	490.243	675.377	886.89	695.596	708.216	821.876	911.683	736.537	643.489
RCOR3_TAATGCCCGTTGGACCACAG	RCOR3	446.444	407.579	491.752	433.12	546.044	465.464	523.533	383.344	477.641	363.183	463.808	574.614	451.201	508.161	419.402	465.535	464.901	435.407	434.549	424.08	430.668	349.083	500.841	548.669	531.318	493.776	451.904	496.648	508.671	339.754
STX2_ACTCACGTCGGAAGTGAAGA	STX2	423.839	488.314	300.13	366.486	337.041	304.081	378.975	356.688	380.164	381.213	443.293	630.047	364.284	394.393	498.432	382.06	434.207	420.893	344.869	284.608	397.582	299.487	374.068	423.402	384.272	372.448	440.382	578.262	306.123	415.688
KCNU1_TCTCTCCTGACTTGTCGCGG	KCNU1	0	0	1.15435	0	11.2975	3.39755	0	5.07741	10.9663	15.4546	7.1355	1.35203	0	0	0	6.42118	2.99453	2.41893	0	0	0	0	0	0	0	4.93776	0	0	0	0
VPS45_AGCTATCTAGAACAACTCAA	VPS45	278.321	192.721	225.098	142.597	280.553	224.238	256.557	280.527	244.913	302.652	370.154	191.989	308.044	183.545	415.22	207.083	371.322	201.98	187.271	201.066	224.433	172.634	384.335	156.584	327.981	149.544	253.476	289.628	327.989	234.615
CTTNBP2_GGTGAATGTAAACTGTGCAT	CTTNBP2	166.71	223.973	140.83	162.587	199.588	176.672	160.185	228.483	171.805	154.546	122.196	146.019	104.812	195.68	135.48	200.662	179.672	199.561	216.945	94.8693	181.972	173.588	140.164	159.089	105.689	138.963	175.385	200.053	182.983	190.808
GPR19_GTAGGCAGTGCCTTCCCAAG	GPR19	124.326	96.3605	122.361	91.9548	118.623	161.384	117.209	111.703	93.8224	240.834	129.331	166.3	166.165	178.994	130.88	137.52	110.049	105.223	147.707	106.197	188.59	92.5166	93.7403	72.6549	113.156	105.104	172.824	160.241	140.402	176.205
ZXDB_TGCGGGGCGATCAGACACCC	ZXDB	500.13	459.666	480.208	558.392	459.43	441.681	481.858	509.01	514.196	448.183	517.324	505.66	416.69	520.296	468.325	515.299	502.333	437.825	655.45	462.311	615.398	534.117	470.933	498.563	468.709	535.394	529.995	510.582	546.648	415.688
HES2_AGAGCCTGAGCCAGCTTAAG	HES2	777.039	700.567	825.358	720.979	771.993	694.799	734.508	694.336	677.471	925.987	844.665	776.066	742.628	621.928	643.111	771.076	722.431	682.137	877.01	914.002	960.594	1249.45	663.324	729.054	752.461	752.655	742.505	807.178	841.263	871.29
DEFB4B_GAGGCATCAGAAATATGAAG	DEFB4B	148.344	205.743	128.133	101.284	135.569	124.011	108.093	123.127	177.897	131.364	189.983	196.045	118.872	142.588	214.928	188.354	214.109	214.075	207.713	122.481	125.726	172.634	208.461	126.52	170.596	179.875	117.777	122.42	94.3688	92.4833
VPS41_AACTGGATCTCACGAAATGT	VPS41	292.449	277.362	245.876	254.541	335.158	326.165	274.79	214.521	194.956	333.561	202.47	421.834	204.51	421.697	227.89	434.5	183.415	439.035	187.271	441.072	126.829	481.659	248.635	387.075	241.247	320.954	102.414	272.709	140.402	277.45
INHBC_AAGACGAGTCTGGTTGATGG	INHBC	351.787	472.687	393.632	347.829	401.06	465.464	441.486	450.62	463.02	495.834	322.882	346.12	364.284	427.765	405.603	424.868	396.776	397.913	388.39	412.752	368.356	375.789	395.495	412.128	449.179	351.286	395.576	653.903	499.464	512.065
CTAGE9_GGAGGAAAATTACCGAATAG	CTAGE9	56.5119	54.6911	88.8847	9.32874	118.623	62.8546	45.5812	62.1983	56.0498	33.4849	58.8679	85.178	37.0675	31.8548	30.1066	42.8078	55.3989	43.5407	17.804	3.5399	11.0286	9.5378	33.9251	37.5801	52.8446	42.3236	61.4487	102.515	35.676	44.7814
CPA4_CCGGCCGATGTATGTACTGA	CPA4	381.455	425.809	442.115	386.477	502.737	448.476	397.208	364.304	464.238	413.41	459.348	415.074	359.171	394.393	445.327	503.527	420.732	529.745	558.517	845.328	554.189	856.494	466.023	407.118	437.117	450.041	448.063	406.077	342.95	428.344
IRF8_ATGGCTCGGAAATGTCCAGT	IRF8	437.967	570.35	437.498	522.41	438.718	436.585	484.463	507.741	594.615	538.334	492.35	609.766	545.787	558.218	607.15	560.248	470.89	527.326	478.729	401.425	491.325	412.987	530.302	537.395	565.782	500.83	510.792	682.767	542.045	567.555
COBL_CCAACATCATGGCACCAACG	COBL	326.356	368.514	345.15	446.447	425.537	385.622	401.115	430.31	436.213	427.577	352.316	379.921	313.156	471.755	411.457	375.639	428.967	458.386	545.329	600.367	633.043	668.6	347.732	488.541	406.674	383.029	521.034	544.422	439.62	415.688
MTHFSD_TGGAGAAAATCCCCATACTG	MTHFSD	145.518	145.843	152.374	109.28	156.281	135.902	151.069	121.858	183.989	177.728	118.628	197.397	90.7514	94.0476	142.17	161.064	117.535	130.622	216.945	171.331	247.041	162.143	137.039	126.52	153.939	208.091	147.221	111.472	81.7095	101.245
ZNF280C_TACAAGATGAAATCTAGGCG	ZNF280C	168.123	160.167	118.898	174.581	186.408	219.142	160.185	129.474	183.989	186.743	181.063	133.851	149.548	138.038	151.369	139.125	156.464	164.487	118.693	160.711	107.529	105.87	220.959	221.723	227.462	253.236	156.182	254.793	196.793	178.152
SLC39A13_CCCGTGGGTGAAGTTATCGA	SLC39A13	141.28	256.527	161.609	131.935	133.687	198.757	112	163.746	147.435	101.743	115.952	154.132	131.654	165.342	163.496	159.994	176.677	177.791	174.083	178.411	188.59	119.222	151.324	164.1	111.433	199.627	126.738	100.524	148.458	121.689
LMNA_TCTCACTCATCCCAGACACA	LMNA	0	0	0	0	1.88291	0	0	0	0	0	0	0	6.39095	4.55069	0	0	0	0	3.29703	0	36.3945	10.4916	0	0	0	0	2.56036	0	0	0
LOC728392_GCGAATCTGCTCGAGACCCC	LOC728392	146.931	154.958	151.219	174.581	199.588	166.48	190.139	184.056	160.838	163.561	129.331	83.826	251.803	285.177	159.314	151.433	148.978	124.575	114.077	130.976	101.463	151.651	184.356	129.025	133.835	132.614	110.096	142.326	147.307	178.152
SPATA3_CCGCTTGCTGGCGTCGTCTG	SPATA3	348.961	320.334	370.545	409.132	372.816	287.093	230.511	318.607	286.341	378.637	371.938	309.615	420.524	350.403	427.765	442.526	398.273	440.244	290.139	237.173	288.95	306.163	329.43	353.253	345.788	395.726	418.619	413.044	339.497	494.542
LMX1B_CGCCCGCATCACGAACTCGG	LMX1B	153.995	127.613	189.313	127.937	192.057	157.986	130.232	163.746	129.158	213.788	164.117	179.82	138.044	122.869	116.663	150.363	157.962	163.277	165.511	115.401	181.421	132.575	171.411	122.762	137.281	155.892	125.458	123.416	140.402	213.198
FAM114A2_ATTCATTGGAAAAAAGACAA	FAM114A2	442.206	420.601	343.995	225.223	344.572	339.755	322.975	366.843	436.213	495.834	290.772	360.992	429.472	429.282	462.471	387.411	473.136	400.332	311.899	316.467	274.613	371.02	532.981	494.805	472.155	440.871	421.179	593.191	515.576	439.052
DDX43_GGTCCTGAGGGATATAGTGT	DDX43	131.39	123.706	107.354	79.9607	141.218	152.89	135.441	115.511	110.881	74.6971	68.6792	94.6422	92.0296	92.5307	97.4283	111.3	110.049	100.385	180.018	96.2853	190.795	114.454	129.897	101.466	60.8862	118.506	121.617	59.7172	92.0671	126.556
STARD9_ACAGTGTGGACATCAACAGG	STARD9	875.935	612.02	723.776	998.176	723.037	752.557	866.043	1058.64	745.705	712.198	716.226	761.194	729.846	703.84	722.141	831.007	765.852	757.124	828.874	567.8	961.145	687.675	819.558	984.599	715.7	751.95	797.553	708.644	906.861	742.787
RBP5_TGTTCTTCTGCGAGACAAAG	RBP5	111.611	201.836	139.676	173.248	111.092	107.023	101.581	167.555	169.368	130.076	115.952	152.78	121.428	175.96	112.482	88.8263	111.546	84.6624	180.018	145.844	175.907	77.2561	144.628	127.772	82.7133	107.925	185.626	117.444	138.101	132.397
TMCC3_TAACGGAAACCAGTCGTTTG	TMCC3	283.972	324.24	363.619	298.52	427.42	414.501	385.487	445.543	439.869	430.152	449.537	494.844	383.457	505.127	534.811	570.414	531.53	526.116	619.842	499.126	571.834	487.381	396.388	308.157	411.269	311.784	459.585	382.19	445.374	464.363
PLXDC1_CCCCTACTCACTCGGCAATG	PLXDC1	272.67	333.355	350.922	257.207	224.066	273.503	276.092	237.369	269.283	252.425	243.499	227.141	350.224	321.582	258.833	295.374	292.716	245.521	261.784	280.36	372.768	320.47	209.353	276.84	216.548	243.361	352.05	245.836	301.52	278.423
DICER1_GCAGTTAGTCCCAAAATGCG	DICER1	156.821	92.454	155.837	138.598	126.155	156.287	125.023	81.2385	175.46	96.5911	130.223	158.188	100.977	103.149	117.918	130.029	89.0873	120.946	112.099	96.9933	85.4719	75.3486	228.994	103.972	168.873	74.7718	38.4054	40.8068	89.7654	113.9
HACD1_ACGACATCGCCATGACCGCG	HACD1	840.615	901.101	842.673	1270.04	828.48	783.135	853.02	760.342	1024.74	882.199	941.887	1014.02	943.304	872.216	1015.26	892.008	941.032	983.293	1088.02	991.88	1119.41	978.578	955.705	964.556	981.646	948.755	816.755	889.786	714.671	957.932
RAB23_ATTACAAAGGCCTACTATCG	RAB23	203.443	231.786	146.602	191.906	220.3	242.925	283.906	267.833	229.073	194.47	336.261	250.126	267.142	178.994	258.415	227.417	219.35	241.893	424.658	325.671	392.619	337.638	200.872	271.829	208.506	193.983	250.915	227.921	245.129	219.039
FABP3_GATGACTACATGAAGTCACT	FABP3	149.757	205.743	163.917	169.25	180.759	166.48	197.953	204.366	164.494	131.364	165.9	148.723	171.277	191.129	176.04	175.512	166.197	133.041	164.192	242.837	204.03	152.605	157.127	137.794	197.018	158.714	151.061	133.368	217.508	120.715
DOCK11_GCAGGTGAAGTAAAGCCACA	DOCK11	73.4655	92.454	113.126	107.947	158.164	101.926	122.418	140.898	114.536	159.697	126.655	114.923	196.841	128.936	109.555	135.38	96.5737	114.899	156.279	118.233	156.055	227.953	123.202	134.036	143.599	102.282	153.622	151.284	181.832	181.073
OR52I1_ATCAGAGCCCACCATAAGAG	OR52I1	187.902	149.749	203.165	149.26	222.183	214.046	218.79	302.106	331.425	247.273	222.093	258.238	223.683	236.636	187.748	194.241	167.694	175.372	174.083	206.022	191.898	223.184	232.565	248.029	275.711	258.174	302.123	261.76	197.944	174.258
PBLD_CTCACGTTTGTCACTCTGAG	PBLD	317.88	390.651	313.982	334.502	244.778	300.683	321.673	308.453	279.03	311.667	451.321	362.345	336.164	317.032	362.116	340.322	424.475	296.318	505.105	628.686	476.437	756.347	319.163	293.125	260.202	281.452	384.054	345.364	255.486	334.887
CPNE5_GGCAGTCAGCGCCAGCGCGT	CPNE5	94.6575	101.569	124.669	70.6319	99.7942	113.818	101.581	85.0466	119.41	42.5001	90.9777	97.3463	95.8642	97.0814	58.5406	40.1324	73.366	65.311	72.5347	37.5229	52.9374	42.9201	83.4735	71.4022	66.0558	79.7095	115.216	135.359	36.8268	68.1456
TMEM132E_GAGCATTGAGGACGTCGTAG	TMEM132E	207.681	246.11	221.635	181.244	269.256	231.033	304.743	261.487	218.107	312.955	145.386	209.565	159.774	292.761	213.673	232.233	221.595	267.291	275.632	337.707	339.13	194.571	278.543	310.662	291.794	294.149	256.036	140.335	250.883	250.192
ZBTB8A_AGATAACTGTAAAAGTGTCA	ZBTB8A	367.327	294.29	319.754	126.604	331.392	353.345	293.022	323.685	394.785	276.894	342.504	378.569	310.6	318.548	322.392	277.181	300.951	353.163	427.955	327.795	301.082	316.655	317.378	293.125	287.199	287.801	291.881	286.643	339.497	341.701
ARHGEF16_GCGGAACCAATCCTACCGGG	ARHGEF16	163.885	111.987	136.213	77.2953	101.677	101.926	104.186	97.7401	119.41	86.2881	96.3293	90.5861	80.5259	116.801	120.008	113.976	91.3332	83.4529	48.1367	77.8778	45.2174	106.823	124.987	195.417	141.876	136.141	74.2505	95.5475	100.123	97.3508
JAK2_TCTTCAGGAGAGAATACCAT	JAK2	173.774	122.404	181.233	151.925	154.399	197.058	158.883	130.743	149.872	220.228	160.549	246.07	76.6914	121.352	115.827	159.994	189.404	134.25	198.481	148.676	173.149	196.479	163.822	179.132	198.167	196.805	160.023	162.232	156.514	154.788
MKX_AGGACGGAGGCGCCTCGGAG	MKX	153.995	197.93	184.696	173.248	129.921	163.082	161.488	167.555	144.998	198.334	195.334	158.188	228.796	274.558	176.876	195.846	236.568	142.717	252.553	128.144	146.681	244.168	192.837	202.933	133.26	193.278	94.7334	170.194	132.346	155.761
GRPEL2_GAGGCGAACCCAGAGATGTG	GRPEL2	94.6575	92.454	111.972	147.927	176.993	140.998	108.093	162.477	118.192	90.1517	118.628	93.2902	104.812	87.98	98.2646	78.6594	109.3	87.0813	102.867	92.0374	158.261	101.101	174.089	145.31	111.433	155.892	48.6469	78.6277	143.855	80.8012
UST_CAGACATTCACAACAAAACC	UST	166.71	190.117	151.219	82.626	111.092	147.793	152.371	144.706	160.838	160.985	140.034	127.091	182.781	87.98	142.588	152.503	203.628	220.122	162.214	101.241	157.158	104.916	108.025	108.982	161.98	112.863	156.182	192.09	127.743	137.265
AP1M1_GTCCTGCGCAGCGAGATCGT	AP1M1	406.886	315.125	497.524	465.105	608.18	473.958	506.602	379.536	394.785	345.152	482.539	319.08	371.953	374.674	467.071	369.218	466.398	345.906	367.289	252.041	448.865	305.209	431.205	239.26	414.715	278.631	254.756	470.771	422.358	309.576
KCNA2_GATGAGAATGAAGACATGCA	KCNA2	315.054	365.91	266.654	266.536	273.022	288.792	270.883	223.406	302.181	289.773	278.285	259.59	308.044	266.974	265.105	264.874	286.726	273.339	222.22	262.661	218.918	222.231	226.762	256.797	261.925	177.759	303.403	294.605	181.832	271.609
KRT13_TCAACTCGGTTTGTGTCCGG	KRT13	495.892	559.933	370.545	531.738	483.908	412.802	434.975	422.694	439.869	485.531	478.079	562.445	488.268	561.252	461.635	502.457	494.847	500.718	331.681	512.578	369.459	505.503	456.649	404.612	428.501	421.12	670.815	745.47	529.386	613.31
EFTUD2_GCAGACGTTACCCAGGAGTG	EFTUD2	134.216	100.267	117.743	130.602	137.452	142.697	153.674	195.48	110.881	130.076	59.7599	62.1935	130.375	98.5983	70.2488	46.5535	88.3387	52.0069	60.6654	64.4262	38.0488	12.3991	22.7655	62.6335	57.4398	47.2614	17.9225	60.7125	41.4302	103.192
SIX4_CGAGAGCCACAGCTTCGAGT	SIX4	127.152	162.771	117.743	137.266	146.867	171.576	234.418	163.746	129.158	133.94	238.147	205.509	173.834	151.69	122.935	85.0806	149.727	135.46	112.099	174.163	139.512	173.588	142.396	146.562	164.852	110.747	115.216	66.6842	116.235	175.231
CTAGE15_GGTTAGGAGTCGGCTTTACG	CTAGE15	275.496	231.786	226.252	233.219	212.769	297.285	315.161	309.722	152.309	206.061	202.47	198.749	218.57	201.747	159.732	148.222	223.841	149.973	215.626	152.216	156.607	170.727	177.66	176.626	175.191	225.726	142.1	183.133	135.799	168.417
TMEM176A_GCCTTCATTTACGAGAAACG	TMEM176A	166.71	151.052	187.004	239.882	139.335	154.588	175.813	194.211	192.519	176.44	243.499	201.453	269.698	203.264	191.512	174.977	231.328	171.744	189.25	151.508	166.532	148.79	218.727	147.815	185.531	160.83	270.118	229.911	207.151	260.9
MMP27_AAGGGACCATCAAAATAGCG	MMP27	332.008	377.629	272.426	303.851	312.563	290.49	320.371	293.22	326.551	391.516	421.887	461.043	337.442	421.697	378.005	392.227	384.797	297.528	484.004	463.727	490.774	703.889	311.575	374.548	373.933	335.062	531.275	486.695	413.151	431.264
CCR8_TGGGACTGTAATGTGCAAAG	CCR8	504.369	563.839	586.408	507.75	542.278	531.716	546.974	701.952	573.901	537.047	602.95	638.159	608.418	606.759	610.913	641.047	718.688	540.63	511.699	568.508	506.766	508.365	578.958	650.136	564.059	688.465	821.876	772.342	570.816	665.88
ZNF557_GAATTCTCAAGTGCGGTCTG	ZNF557	230.286	355.492	253.956	333.169	265.49	261.611	274.79	237.369	359.45	275.607	382.641	313.671	347.668	433.833	358.77	315.173	365.333	298.737	435.208	510.454	408.059	482.612	274.972	279.345	329.13	325.187	307.243	333.421	332.592	293.999
STRIP1_GTGATGCAGTGCACGCTAGG	STRIP1	275.496	319.032	275.889	262.537	344.572	383.923	333.394	321.146	363.105	292.349	274.717	255.534	419.246	174.443	239.18	263.803	273.251	257.616	206.394	125.312	275.716	148.79	333.894	180.384	290.071	126.266	172.824	246.831	390.134	311.523
POLR1C_GGATATCATCATGCACTGGT	POLR1C	165.297	110.684	146.602	141.264	214.652	207.25	194.046	176.44	192.519	73.4092	129.331	94.6422	231.352	139.555	96.1739	67.9574	83.8469	60.4731	50.7743	48.1427	10.4772	8.58402	31.6932	33.8221	48.2494	71.9502	16.6423	0	120.838	18.4967
FAXC_GAAAACCCTTTACTTGACCG	FAXC	259.955	276.06	234.332	221.224	271.139	231.033	273.487	173.901	243.695	176.44	250.635	190.636	216.014	265.457	255.488	277.716	206.623	203.19	276.291	329.919	333.616	239.399	279.882	244.271	214.825	246.888	263.717	216.973	218.659	264.794
VSX2_AGCCATTGGGCAGAGCATCG	VSX2	443.619	488.314	386.706	359.823	391.645	416.2	350.324	393.499	388.693	565.38	454.888	502.956	346.389	480.856	461.217	430.754	351.858	417.265	396.303	411.336	370.562	460.676	361.57	365.78	478.473	377.386	497.99	529.493	447.676	555.873
SLC2A4_AGCACGACCGCAATGATCAG	SLC2A4	593.375	440.133	542.543	599.705	461.313	536.813	536.556	420.156	471.549	641.365	520.892	492.14	582.854	514.228	546.519	485.869	525.54	464.434	607.313	497.71	639.109	534.117	438.348	477.267	444.01	448.631	655.452	647.932	514.425	477.019
TMEM140_GACCTGCCCAACCTGAGAAT	TMEM140	204.856	220.067	168.535	170.583	214.652	198.757	153.674	239.908	129.158	159.697	156.089	178.468	177.668	226.018	155.551	125.748	146.732	180.21	120.012	103.365	173.149	153.559	177.66	239.26	189.551	193.278	185.626	186.119	166.872	141.159
P2RX7_TGAGTGACAAGCTGTACCAG	P2RX7	172.361	234.39	153.528	322.508	254.193	217.443	184.929	210.712	203.485	199.622	118.628	150.076	161.052	153.207	151.369	246.68	168.442	209.237	212.988	157.172	205.133	118.269	175.428	205.438	138.43	219.378	93.4532	66.6842	174.927	180.099
PACRG_CAAAGCCCATCAAAAAACAG	PACRG	105.96	136.728	103.891	77.2953	122.389	91.7338	160.185	95.2014	148.654	118.485	111.492	132.499	122.706	172.926	137.152	166.951	164.699	143.926	161.555	109.029	200.17	129.714	162.93	151.573	148.195	136.141	117.777	154.269	97.8213	153.814
CCR8_AAGGTGAGGACGATCAGGAT	CCR8	615.98	546.911	678.756	755.628	704.208	755.954	767.066	755.265	888.267	811.365	644.871	709.817	780.974	814.574	804.516	823.516	732.912	842.995	643.581	591.871	558.6	556.054	807.059	697.737	739.824	814.73	718.181	705.658	703.162	698.979
GNAT2_GCACCATATCATAGGCACTG	GNAT2	211.92	217.462	243.567	262.537	195.823	234.431	212.278	194.211	129.158	179.016	214.065	227.141	134.21	127.419	221.618	211.899	186.41	191.095	201.778	267.617	276.819	261.336	203.104	194.164	205.06	223.61	151.061	138.345	169.173	177.178
WAS_ATGTGCAGGACTGCCAAGCG	WAS	327.769	277.362	331.298	301.185	269.256	355.044	300.836	279.258	349.702	287.198	360.343	386.681	283.758	361.022	311.52	353.165	363.836	298.737	279.588	332.751	280.679	394.865	301.308	293.125	269.967	326.597	396.856	393.138	313.028	384.536
CACHD1_TGGGTGTTGCTATGTAACGG	CACHD1	115.849	135.426	121.206	183.91	129.921	154.588	138.046	112.972	188.863	137.803	158.765	146.019	171.277	136.521	86.5565	111.835	125.77	123.365	30.3327	32.5671	47.9745	47.689	115.613	157.836	141.302	143.195	106.255	85.5947	107.028	111.953
FAM227B_AAAAGTGCTTCAAATATTCG	FAM227B	452.095	466.177	412.102	221.224	380.348	363.538	363.347	403.654	318.021	436.592	430.806	389.385	439.697	427.765	502.613	463.93	468.644	501.927	597.422	400.009	553.086	393.911	431.652	457.225	407.248	444.398	515.913	427.973	468.391	459.496
TBRG1_TGATGAAATTGCTCGTCTTG	TBRG1	614.567	662.804	631.428	653.012	651.486	541.909	797.02	833.964	677.471	575.683	970.429	754.434	750.297	746.313	733.431	696.163	580.939	683.346	838.105	906.215	849.204	893.691	651.272	622.577	687.554	634.855	800.113	842.013	739.989	676.588
FKTN_GAGTCTATCCCGTCTAGCCG	FKTN	839.202	731.819	686.837	732.973	745.632	793.327	716.276	875.853	772.512	938.866	1003.43	945.07	878.116	858.564	825.005	896.289	869.163	775.266	863.163	875.063	871.813	657.154	827.593	769.139	766.821	868.34	980.618	1025.15	985.118	906.336
CCDC134_TGCAGAAACTGATACCCCAG	CCDC134	300.926	289.082	266.654	162.587	261.724	280.298	319.068	231.022	261.972	309.092	261.338	224.437	414.133	336.751	258.415	217.25	273.251	220.122	298.711	249.917	236.013	235.584	340.143	288.114	300.984	237.718	273.959	260.765	222.112	285.238
EPM2A_GTACAATATCCCATTCAGTC	EPM2A	142.693	151.052	83.113	93.2874	107.326	105.324	113.302	129.474	135.25	86.2881	150.738	178.468	182.781	160.791	87.3928	138.055	123.524	129.412	101.549	65.1342	109.183	112.546	140.164	171.616	126.368	215.145	140.82	119.434	155.363	245.324
TRO_GGCCATAGCTAGTGCCACCG	TRO	168.123	209.649	244.722	190.573	227.832	188.564	239.627	178.979	216.888	157.122	186.415	159.54	181.503	235.119	178.549	160.529	122.776	192.305	178.04	290.272	244.284	266.105	186.141	157.836	156.811	152.365	232.993	265.742	241.676	228.774
RPS25_TAAACTTATAACCCCAGCTG	RPS25	158.233	92.454	171.998	97.2855	256.076	225.937	165.395	138.359	99.9148	54.091	68.6792	56.7853	76.6914	103.149	38.0514	78.6594	26.9508	82.2435	29.6733	7.78778	9.37433	1.90756	59.3689	47.6015	68.9277	72.6556	7.68108	19.9057	43.7319	17.5231
PROSER2_TGGCGCAGAAGATTTCCGAG	PROSER2	385.694	522.17	468.665	549.063	382.231	348.249	369.859	394.769	406.97	513.865	311.286	301.503	331.051	445.968	326.155	335.506	385.546	397.913	290.139	275.404	255.313	382.466	428.527	403.36	435.968	427.469	597.844	522.526	380.928	463.39
ZRANB2_TTCTAAATATAAGTTAGATG	ZRANB2	134.216	104.174	151.219	17.3248	235.364	140.998	46.8835	139.629	177.897	216.364	160.549	139.259	198.119	165.342	140.916	142.871	171.437	146.345	128.584	151.508	106.426	128.76	124.094	164.1	117.177	158.008	88.3325	98.5334	177.229	148.947
CAPZA1_ATTACAGAGCACGGTGACCT	CAPZA1	662.602	501.335	645.28	647.681	465.079	635.341	570.416	510.28	516.633	413.41	848.233	604.358	618.644	502.093	598.369	638.372	637.835	615.616	484.664	494.17	537.646	434.924	542.801	640.114	541.657	620.041	623.448	545.417	499.464	582.158
COX15_TCTCAACTGTAGGAGTTGGT	COX15	2.8256	0	3.46304	0	1.88291	5.09632	0	0	2.43695	14.1667	3.56775	10.8163	6.39095	16.6859	0	0	0	0	3.95644	0	1.10286	1.90756	3.57106	3.75801	5.16958	10.5809	6.4009	1.99057	0	0
NUP210_TATGACGTCTACCTGATGGT	NUP210	132.803	108.08	128.133	177.246	94.1454	113.818	101.581	125.666	104.789	151.97	137.358	156.836	113.759	160.791	162.659	143.406	157.213	149.973	180.677	120.357	136.204	89.6553	167.84	154.078	141.302	153.776	56.3279	75.6418	173.777	203.463
PCDHGA9_CACCAGTAGAACCATCAGTG	PCDHGA9	421.014	397.162	337.069	357.158	429.303	365.236	290.417	365.573	338.735	383.789	397.804	396.145	302.931	327.65	326.155	348.884	323.41	347.116	393.666	300.892	423.499	388.188	405.315	423.402	319.365	399.253	354.61	230.907	280.805	288.158
RNF214_TGGCTACTTACACTCAACAG	RNF214	330.595	347.679	485.98	362.488	431.186	511.331	402.417	512.818	388.693	519.016	506.621	465.099	417.968	417.147	399.331	424.333	522.546	417.265	514.996	709.396	486.914	596.112	533.427	582.492	474.453	539.626	666.974	561.342	443.073	427.37
GNMT_CTGCATACCCCACTTGTCGA	GNMT	206.269	316.427	240.104	207.898	325.743	220.841	217.487	192.942	214.451	260.152	173.928	214.973	269.698	250.288	294.376	195.846	291.967	228.588	144.41	198.942	130.138	208.878	217.835	279.345	228.61	219.378	264.997	161.236	262.391	200.543
HIST1H3I_GGGCTTCTTGACGCCACCGG	HIST1H3I	176.6	239.599	140.83	167.917	192.057	191.961	209.674	165.016	212.014	301.364	130.223	156.836	217.292	276.075	138.407	185.144	153.47	145.136	173.424	233.633	181.972	160.235	162.483	199.175	153.364	202.448	172.824	202.043	191.039	99.2978
CACTIN_GCGAAACCGACGGCGCCGGG	CACTIN	289.624	252.621	288.587	331.837	280.553	300.683	298.231	266.564	281.467	314.243	242.607	206.861	295.262	216.916	209.91	310.357	300.202	238.264	251.234	249.917	351.262	315.701	269.169	250.534	236.078	280.747	299.562	403.091	229.017	318.337
KIF22_GCCAGTCGAAATCGGACTGT	KIF22	101.721	115.893	103.891	81.2933	124.272	120.613	110.697	162.477	136.469	176.44	101.681	120.331	148.27	153.207	139.661	138.59	99.5682	119.737	121.331	133.1	131.241	88.7015	98.2041	96.4556	165.427	110.747	125.458	85.5947	138.101	154.788
ASXL3_TCCCATTTCAGCCACTACAG	ASXL3	224.635	190.117	203.165	155.923	225.949	208.949	205.767	252.601	192.519	144.243	202.47	160.892	228.796	238.153	191.93	194.241	229.082	222.541	201.778	77.1698	188.038	98.2393	209.353	175.374	148.769	202.448	138.26	219.958	191.039	196.649
IRF3_GGGGAGTGATGAGCTACGTG	IRF3	391.345	622.437	531	491.758	512.151	586.077	532.649	531.859	370.416	452.046	593.139	531.349	533.005	599.174	567.008	541.519	598.907	503.136	581.596	641.43	609.883	629.495	484.325	465.993	495.131	436.639	574.801	734.522	565.062	607.469
DNAJA1_TAGGACTGATCCGCTCCCCA	DNAJA1	409.711	523.472	380.935	433.12	455.664	455.271	457.114	453.159	300.963	257.576	304.151	302.855	331.051	229.051	337.027	332.831	382.552	284.224	395.644	255.581	480.848	301.394	361.123	325.694	388.867	254.647	243.234	375.223	261.24	464.363
FAM160A2_ACTGGACCATGCCGCAACAG	FAM160A2	295.275	252.621	308.211	327.839	224.066	217.443	252.65	260.217	199.83	234.394	275.609	508.364	260.751	297.312	270.96	279.856	266.513	214.075	183.315	248.501	162.672	183.126	232.565	280.598	263.649	295.56	188.187	218.963	258.939	236.562
C1orf122_CGGGCTCAGACTGGTCACGG	C1orf122	74.8783	89.8497	91.1934	71.9646	137.452	107.023	98.9763	129.474	137.687	94.0153	83.8422	116.275	146.992	81.9124	84.8839	89.8965	111.546	110.061	175.402	159.296	167.084	138.298	89.2765	119.004	78.1181	121.328	76.8108	70.6654	107.028	114.874
EZH1_ACCATTCTCAGGGAACATTG	EZH1	343.31	315.125	315.137	450.445	389.762	334.658	324.278	354.149	309.492	285.91	297.015	333.952	336.164	335.234	205.729	301.26	283.732	320.508	313.218	330.627	303.287	362.436	347.732	360.769	263.649	272.988	358.451	357.308	314.179	283.291
LZTS2_AGCAGGGCCTCATCCGAAGG	LZTS2	548.166	688.848	599.106	704.986	617.594	730.473	717.578	654.986	638.48	784.32	795.609	694.944	526.614	620.411	615.095	652.82	583.185	616.826	552.582	533.817	532.683	474.982	674.484	707.759	671.471	680.705	634.97	805.187	599.587	620.125
ZNF623_GGATCTGATAATGGCGAATG	ZNF623	279.734	282.571	248.185	229.221	220.3	225.937	237.022	295.759	169.368	292.349	319.314	248.774	297.818	315.515	237.508	221.531	235.819	286.643	236.067	207.438	284.539	207.924	283.899	200.427	309.6	226.431	390.455	355.317	242.827	264.794
SMO_CAAGAACTACCGATACCGTG	SMO	144.105	139.332	196.239	111.945	124.272	144.396	147.162	99.0095	147.435	144.243	130.223	131.147	222.405	174.443	122.935	142.871	99.5682	120.946	114.077	194.695	119.109	107.777	160.698	244.271	140.727	224.315	221.471	137.35	134.648	132.397
P2RX1_AAGGGCTACCAGACCTCGAG	P2RX1	202.03	205.743	113.126	167.917	180.759	120.613	175.813	157.4	109.663	198.334	153.413	147.371	158.495	118.318	154.296	161.064	219.35	123.365	193.206	272.572	226.087	264.197	144.182	149.068	201.039	134.025	230.433	168.203	133.497	257.98
DHDH_AGTTCGCGAGATGGTCGCGG	DHDH	347.548	351.586	375.163	341.165	333.275	297.285	293.022	342.725	254.661	262.728	272.933	416.426	345.111	388.326	321.555	290.558	349.612	255.197	331.022	426.912	283.987	357.667	357.999	295.63	327.407	380.913	316.205	318.492	318.782	430.291
F12_CTCGGCAGTCACGTTCCGGT	F12	339.072	388.046	352.076	359.823	329.509	436.585	381.58	369.382	367.979	414.698	288.988	343.416	458.87	382.258	279.322	284.137	290.47	279.386	221.561	286.024	255.313	326.193	368.265	378.306	283.753	493.07	270.118	253.798	387.833	354.357
TAAR9_ACGGCGTAGAGGATAGATCG	TAAR9	583.486	727.913	682.219	815.599	679.73	640.438	727.997	686.72	622.64	759.85	785.797	763.898	809.094	858.564	689.525	606.801	761.36	717.211	747.767	715.768	753.255	796.406	632.97	730.307	645.623	725.145	719.462	764.38	685.9	797.303
TMPRSS11E_AGAGTCTCAGGATCGTTGGT	TMPRSS11E	378.63	399.766	318.6	394.473	359.636	281.996	416.742	389.691	332.643	365.758	463.808	394.793	291.427	461.137	343.717	405.069	320.415	331.393	433.889	233.633	381.591	231.768	380.318	357.011	330.853	447.925	366.132	381.195	432.715	388.43
ZNF768_GGAGCCCCGGGTATGAACCC	ZNF768	139.867	125.008	84.2673	85.2914	60.2531	117.215	106.79	86.316	141.343	153.258	128.439	101.402	95.8642	97.0814	120.426	93.1071	131.011	160.859	96.2733	145.136	132.895	122.084	80.3488	88.9396	149.918	97.3444	115.216	172.185	154.212	162.576
OR13C2_AGGAAGCTCACTAGCGTGGA	OR13C2	641.41	628.948	627.965	703.654	730.569	730.473	727.997	742.571	693.311	698.032	736.741	600.302	659.546	694.739	770.228	675.294	668.529	731.725	693.036	729.22	658.961	642.847	618.686	735.317	658.834	743.485	884.605	929.598	700.861	697.032
COMT_CACAGCTGAGTAGCCACAGT	COMT	125.739	209.649	137.367	99.9508	169.462	178.371	119.813	142.167	119.41	25.7576	69.5712	81.1219	31.9547	45.5069	99.5191	72.2382	89.0873	73.7772	67.2594	31.8591	60.6575	23.8445	59.8152	35.0748	106.838	38.0913	8.96126	27.868	29.9218	59.384
ZNF687_CAAACACCACTGAACAGCTG	ZNF687	453.508	296.895	434.035	326.506	378.465	428.091	425.859	364.304	385.037	310.379	430.806	455.635	451.201	357.988	346.644	398.648	314.426	478.947	347.507	187.615	355.673	325.239	415.582	209.196	426.203	311.079	277.799	282.661	383.229	356.304
TFB1M_TCAAGCCACTTGATAATCAG	TFB1M	336.246	309.916	330.143	326.506	350.221	283.695	329.487	316.069	346.046	392.804	288.988	312.319	368.119	345.853	397.24	361.726	454.42	500.718	393.666	281.068	308.25	303.302	402.191	365.78	396.335	318.838	376.373	336.407	424.659	430.291
GPKOW_AGAGGAGGCTAATTATGAGG	GPKOW	94.6575	104.174	99.2739	90.6221	112.975	120.613	130.232	60.9289	65.7975	90.1517	50.8405	63.5455	74.135	75.8449	107.464	79.1945	107.803	82.2435	92.3169	73.6299	85.4719	115.407	77.6705	47.6015	51.1214	54.3153	64.009	64.6936	54.0894	73.0131
ZNF645_AAAATTCCTGGTTACCGTTG	ZNF645	469.049	466.177	510.221	502.419	557.341	489.247	558.695	530.589	452.053	515.153	569.057	570.557	609.696	693.222	514.739	513.694	580.939	499.508	529.503	557.18	607.126	566.545	574.494	538.648	498.577	517.759	586.323	567.313	712.369	650.303
SLC13A2_CTCGGTCTGGATGACGCAGT	SLC13A2	245.827	372.42	297.822	377.148	344.572	392.417	376.37	324.954	346.046	220.228	267.581	251.478	244.134	289.727	214.51	217.785	238.065	208.028	172.105	160.711	183.075	171.68	205.336	234.249	214.25	225.726	250.915	212.991	347.553	259.927
GLIPR2_TGAAGGCCCACAATGAGTAC	GLIPR2	121.501	97.6627	131.596	77.2953	148.75	156.287	101.581	96.4708	96.2594	72.1214	80.2744	105.458	130.375	128.936	123.353	122.002	131.759	85.8718	147.707	136.64	150.541	88.7015	123.202	135.288	128.665	168.589	142.1	114.458	105.877	81.7747
SLC46A1_AGAGCTGGACAATGGATCGG	SLC46A1	217.571	165.376	210.091	205.232	225.949	217.443	265.673	252.601	146.217	122.349	250.635	235.254	255.638	262.423	196.947	264.874	220.098	256.406	265.081	211.686	224.433	188.848	225.869	226.733	171.745	219.378	188.187	130.383	344.101	250.192
PDE4B_AAACGCTGGAGGAATTAGAC	PDE4B	760.085	734.424	661.441	671.67	657.135	640.438	828.275	847.927	902.888	980.078	865.18	851.78	911.349	908.621	953.794	843.314	926.808	809.13	842.062	999.668	1010.22	965.225	788.758	879.374	678.938	656.016	1054.87	1110.74	1081.79	1011.48
SEMA5A_CTAGACCAGGAATCTCACCG	SEMA5A	152.582	158.865	171.998	95.9528	154.399	147.793	157.581	139.629	170.586	198.334	247.067	125.739	166.165	177.477	212.419	200.127	228.333	218.913	172.764	131.684	160.467	132.575	199.533	167.858	149.343	244.066	177.945	201.048	195.643	219.039
RGS22_TTGTTGTAGGGTACACAACA	RGS22	337.659	335.96	402.867	358.49	308.797	329.562	304.743	407.462	425.247	396.667	375.506	370.457	405.186	433.833	440.309	366.542	450.677	424.521	299.37	368.15	325.345	268.012	422.278	438.434	318.216	453.568	401.977	439.917	310.726	355.33
RGS19_CTGCCACTAGGAACCAAGAG	RGS19	129.977	177.095	128.133	117.276	128.038	112.119	126.325	99.0095	162.057	207.349	137.358	170.356	184.059	188.095	186.076	164.81	119.033	114.899	73.8535	104.073	152.195	100.147	91.5084	113.993	90.7549	124.855	87.0523	94.5522	94.3688	117.794
SRSF10_TTCTACACTCGCCGTCCAAG	SRSF10	575.009	358.097	458.276	386.477	478.259	424.694	567.811	380.806	444.743	257.576	296.123	356.936	304.209	268.491	249.634	325.875	268.011	301.156	316.515	102.657	253.658	190.756	370.944	328.2	420.459	313.195	151.061	127.397	277.352	210.278
FGGY_GAACGTCTTCTTGTCACATG	FGGY	179.425	259.132	161.609	246.545	210.886	254.816	315.161	252.601	204.703	238.258	253.31	232.549	161.052	197.197	249.634	254.707	239.563	199.561	236.727	203.898	285.09	148.79	210.692	219.217	248.714	234.191	184.346	252.803	220.961	222.933
TRANK1_GGACTTCGATAACATGACCT	TRANK1	341.897	429.716	292.05	333.169	325.743	390.718	401.115	434.118	415.499	408.258	354.991	312.319	386.013	420.181	338.281	384.735	519.551	391.866	313.218	253.457	270.201	246.075	387.014	320.684	384.847	363.983	450.624	435.936	310.726	358.251
FAM102B_TGATGTTCTAGAATGTCCAC	FAM102B	144.105	151.052	168.535	169.25	180.759	110.42	213.58	157.4	140.124	127.5	148.954	136.555	260.751	151.69	149.697	103.809	137.748	165.696	219.582	176.995	239.873	195.525	152.216	151.573	105.689	203.153	142.1	198.062	154.212	220.986
FAM219B_TCTATTACCGATCTGCCCGG	FAM219B	223.222	138.03	138.522	238.549	233.481	181.769	191.441	191.672	151.091	177.728	191.767	173.06	262.029	262.423	153.46	185.679	226.087	181.419	187.931	154.34	149.438	126.853	180.785	240.513	178.638	189.751	119.057	142.326	197.944	146.026
GHRHR_GTGAAGATTATCTACACCGT	GHRHR	214.745	227.88	253.956	194.571	254.193	208.949	247.441	246.254	177.897	160.985	235.472	256.886	195.563	206.298	170.186	206.548	229.082	189.886	149.685	165.667	129.035	148.79	247.742	278.093	249.289	289.917	281.64	256.784	98.9721	280.37
SDR9C7_GGTGGTCTGCAGCCGATAGG	SDR9C7	80.5295	93.7562	128.133	93.2874	90.3796	125.709	92.4647	66.0063	164.494	77.2729	73.1389	102.754	80.5259	84.9462	97.4283	139.661	115.29	111.271	66.6	108.321	59.0032	108.731	74.0995	96.4556	102.817	107.22	126.738	122.42	143.855	98.3243
ZNF367_GCCGCACGTTGGCTTGATCG	ZNF367	282.56	354.19	333.606	331.837	306.914	300.683	367.254	291.951	364.323	350.304	252.418	277.167	209.623	239.67	305.666	293.769	271.754	331.393	296.073	228.678	281.781	213.647	289.702	199.175	300.984	213.734	285.48	285.647	321.084	290.105
ADCK4_GGAGTGTGACTACCGTCGTG	ADCK4	416.775	593.789	389.015	485.095	455.664	487.548	446.696	449.351	436.213	459.774	442.401	515.124	449.923	468.721	395.986	366.542	385.546	436.616	605.994	465.143	542.609	487.381	603.509	566.207	469.283	524.813	439.102	362.284	440.771	398.165
GREB1L_AGCTTGAGTCAATTAACCGG	GREB1L	435.142	480.501	415.565	255.874	515.917	365.236	365.952	436.657	361.886	291.061	354.099	352.88	346.389	326.133	393.059	376.174	414.743	499.508	465.541	317.883	462.1	412.033	476.29	467.246	496.854	512.116	423.74	420.011	492.559	358.251
OR2AT4_GGAGGAAAATAAAAAACACA	OR2AT4	73.4655	49.4824	84.2673	15.9921	71.5505	64.5534	36.465	63.4676	67.016	109.47	100.789	73.0097	53.684	81.9124	102.864	130.564	104.809	124.575	70.5565	51.6826	79.9576	49.5965	52.6731	66.3915	53.419	70.5394	110.096	139.34	74.8045	123.636
MICB_ATTTGTGACGTTCATAGCCA	MICB	669.666	622.437	611.804	665.006	482.025	579.282	556.091	615.636	579.993	573.107	663.602	559.741	564.96	723.56	878.528	757.164	767.349	751.076	709.521	650.634	765.938	677.184	660.2	661.41	615.754	592.531	806.514	788.267	716.972	714.555
SSU72_GGGTGGAGCCCAACTACCTG	SSU72	89.0063	93.7562	99.2739	78.628	101.677	95.1313	78.1392	71.0837	57.2682	34.7728	40.1372	36.5049	54.9621	30.3379	28.434	26.7549	41.1748	49.588	39.5644	4.95586	12.1315	6.67646	29.4612	8.76869	44.803	11.2863	16.6423	13.934	103.575	39.9138
CD1E_CCTGCCCTCGATTTCTAGCG	CD1E	151.169	145.843	162.763	195.904	144.984	190.263	144.558	201.827	168.149	191.894	138.25	114.923	209.623	171.409	155.133	189.96	195.393	148.764	253.212	400.717	277.37	330.008	168.733	150.32	128.091	133.319	236.833	224.935	136.95	147
PCGF5_ACGAAATAATGGGCAATCAG	PCGF5	567.945	522.17	447.887	366.486	472.61	424.694	425.859	465.852	533.691	576.971	513.756	580.022	392.404	442.934	518.921	542.054	478.377	598.684	547.967	562.844	372.216	469.26	549.943	544.911	456.072	500.124	565.84	625.04	614.548	547.112
ATP6V1A_AGTGGTTACAGCCTGTGACA	ATP6V1A	323.531	308.614	337.069	343.831	440.601	453.573	333.394	293.22	251.005	345.152	125.763	236.606	177.668	157.757	148.024	214.574	168.442	188.676	96.9327	240.005	78.8547	183.126	163.376	146.562	195.295	130.498	97.2937	142.326	140.402	272.582
IDH3B_TTGTGCCGAGTCATATACCC	IDH3B	220.396	274.758	227.406	254.541	193.94	169.877	238.325	185.325	237.602	251.137	149.846	177.116	195.563	310.964	169.768	205.478	166.197	166.906	219.582	248.501	215.61	381.512	285.685	314.42	226.887	252.531	229.152	201.048	140.402	176.205
FAM179A_GCACCGGGTCTCAACTCGTG	FAM179A	333.42	315.125	359.002	487.76	248.544	324.466	365.952	385.883	289.997	352.879	311.286	402.905	235.187	353.437	261.342	319.989	223.841	280.595	218.923	249.209	194.104	187.895	290.149	263.061	362.445	263.112	272.678	231.902	307.274	269.662
ICMT_CAAACCCCAGGAAACAAGCT	ICMT	166.71	102.871	163.917	110.612	143.101	110.42	132.837	151.053	131.595	145.531	85.6261	135.203	164.886	84.9462	110.391	150.363	111.546	101.595	135.178	347.618	102.015	287.088	141.057	126.52	86.7341	150.954	116.496	130.383	126.592	72.0396
PTBP3_ACTCGCTTAGACCTTCCTAC	PTBP3	617.393	470.083	594.489	658.343	544.161	547.005	617.3	498.855	570.245	428.864	509.297	617.879	488.268	505.127	704.997	721.312	547.251	674.88	790.628	693.113	560.806	612.327	579.404	473.509	556.592	442.987	455.744	451.86	538.592	454.628
SMEK2_AAAAATACATCAGACTTACA	SMEK2	439.38	441.435	443.269	243.88	286.202	356.743	242.232	366.843	380.164	387.652	374.614	315.023	319.547	333.717	379.678	267.014	363.836	308.413	294.095	273.28	360.636	272.781	453.525	395.844	387.719	347.054	490.309	359.299	384.38	330.993
KRT24_GGGAGTTCTAGATTCAGCAG	KRT24	243.001	256.527	213.554	191.906	286.202	239.527	199.255	256.409	297.307	245.985	239.039	212.269	227.518	313.998	277.65	246.145	304.694	292.69	418.723	378.061	478.643	420.617	235.69	255.545	145.323	288.506	208.669	321.478	165.721	269.662
WBSCR27_GGGCGCACGGTACAGCAGGG	WBSCR27	276.908	283.873	302.439	274.532	237.247	266.708	304.743	321.146	242.476	177.728	190.875	243.366	265.863	332.2	247.543	241.864	217.104	228.588	242.662	250.625	375.525	291.857	227.655	278.093	263.649	325.892	305.963	226.925	216.358	234.615
COMMD9_TACTTGGAGAACCGAAGCCC	COMMD9	90.4191	143.239	121.206	91.9548	118.623	101.926	85.9531	133.282	142.561	118.485	160.549	102.754	67.744	103.149	117.081	104.879	151.224	87.0813	65.2812	123.897	76.0975	88.7015	123.648	146.562	136.707	143.195	90.8928	88.5805	134.648	212.225
Non-Targeting_AAAATAGCAGTAAACTCAAC	Non-Targeting	378.63	619.833	482.517	417.128	455.664	441.681	350.324	453.159	497.137	578.259	594.923	619.231	549.621	492.992	640.602	572.555	533.027	593.846	593.466	453.815	703.627	662.877	405.762	513.595	432.522	505.768	683.616	788.267	605.341	594.814
NIPAL4_GCTACCTGAAAGATGCAATG	NIPAL4	173.774	184.908	180.078	198.569	120.506	197.058	179.72	142.167	142.561	231.819	135.575	116.275	166.165	145.622	163.914	185.679	194.645	193.514	168.149	126.728	110.286	171.68	212.478	156.584	117.177	173.527	222.751	214.982	216.358	181.073
ZNF782_ACTCACAAAACTCTCACAGG	ZNF782	641.41	576.861	664.904	557.059	627.009	579.282	544.37	614.367	723.773	633.638	561.029	509.716	446.088	470.238	632.657	522.791	548.748	609.569	492.576	448.859	519.448	383.419	500.841	583.744	481.92	624.274	423.74	436.931	524.782	506.224
LHX2_GGTGTCGCCGCGGTCGATGG	LHX2	218.984	192.721	232.024	221.224	337.041	266.708	289.115	191.672	166.931	244.697	275.609	178.468	153.383	222.984	217.437	194.241	199.885	135.46	199.141	181.951	214.507	147.836	181.678	179.132	244.693	201.037	147.221	127.397	171.475	171.337
RHEBL1_GGAAGGCTACGATCCTACAG	RHEBL1	553.817	451.853	332.452	350.494	423.655	349.947	380.277	331.301	343.609	262.728	342.504	325.84	319.547	362.538	200.711	305.541	209.617	267.291	287.501	339.83	275.716	306.163	282.114	283.103	297.538	305.436	197.148	214.982	367.117	288.158
MAATS1_GTTTCTTTGAAGGAAGCGAG	MAATS1	327.769	431.018	356.693	339.833	342.689	406.007	380.277	364.304	322.895	347.728	330.909	301.503	291.427	382.258	388.459	391.157	446.185	396.704	382.456	438.948	350.159	371.02	487.003	348.242	411.269	380.207	348.209	478.733	398.19	465.337
DCAF13_CCTATATGTTCAATGACCTG	DCAF13	199.205	230.484	211.246	187.908	274.905	197.058	167.999	172.632	180.334	82.4244	89.1938	104.106	126.541	133.487	128.789	80.7998	117.535	105.223	59.3466	21.2394	76.0975	17.168	131.236	92.6976	119.475	104.398	101.134	47.7738	206	92.4833
BCL7A_TCGTAGGGATGTGTCACCAA	BCL7A	291.036	317.729	293.204	351.827	280.553	259.912	355.533	305.914	210.796	175.152	338.045	244.718	318.269	288.21	322.392	345.673	300.951	318.089	504.446	501.25	451.622	573.222	237.922	355.758	317.068	388.672	339.248	287.638	322.235	379.668
MS4A10_GTCTTGGTATCCATTCTGGG	MS4A10	192.141	187.512	171.998	138.598	212.769	159.685	218.79	148.514	141.343	127.5	123.979	109.515	187.894	200.23	117.499	103.809	113.792	102.804	128.584	84.9576	161.018	137.344	161.144	160.342	99.9452	117.095	126.738	122.42	135.799	107.086
FILIP1L_ATAGATGTCCTCCTGCCAAG	FILIP1L	508.607	531.285	616.421	602.37	534.746	550.403	432.37	611.828	618.984	587.274	503.053	552.981	456.314	594.624	601.714	480.518	598.158	576.914	423.998	528.153	526.617	436.831	658.414	628.84	565.782	518.465	533.835	442.903	616.849	582.158
CPNE5_ATGTCTGGCAACGTACCCGT	CPNE5	590.55	533.889	642.971	850.248	478.259	451.874	492.277	495.047	492.263	553.789	435.266	435.354	512.554	462.654	426.928	498.711	452.923	395.494	529.503	450.983	420.742	396.772	460.667	596.271	453.2	519.875	535.116	539.445	502.916	440.026
RPS27A_GGATACGATAGAAAATGTAA	RPS27A	350.374	282.571	320.909	79.9607	367.167	315.972	213.58	281.796	249.787	227.955	150.738	131.147	135.488	139.555	121.263	172.302	164.699	140.298	93.6357	101.949	74.4432	49.5965	113.828	225.481	145.323	168.589	67.8496	107.491	81.7095	111.953
PUF60_TTTCTATTGACCGATTGCAA	PUF60	310.816	302.103	333.606	271.866	325.743	293.888	278.696	366.843	404.533	385.077	302.367	346.12	332.329	294.278	360.025	427.008	398.273	387.028	290.798	196.818	235.461	182.172	271.847	254.292	284.901	387.967	236.833	306.548	322.235	336.834
AEBP2_GAGGAGCCCAAGGGACCGCG	AEBP2	149.757	105.476	110.817	207.898	122.389	93.4326	167.999	105.356	109.663	59.2425	78.4906	86.53	84.3605	116.801	106.209	100.063	88.3387	124.575	235.408	285.316	217.264	244.168	71.4212	53.8648	97.6476	96.639	65.2892	74.6465	104.726	110.98
NXPE2_GCCTCAACATATGCCCTGTG	NXPE2	628.695	764.373	632.582	702.321	647.721	604.764	651.16	516.626	590.959	813.941	624.357	577.318	631.426	627.995	684.507	617.503	687.245	754.705	460.266	504.082	458.791	531.255	657.075	730.307	588.758	629.212	794.992	566.318	581.173	638.621
42620_CTGGAGAATACAAATCTGTG	42985	169.536	145.843	147.756	123.939	184.525	234.431	153.674	115.511	109.663	130.076	76.7067	112.219	88.1951	81.9124	84.8839	82.9402	101.065	95.5475	88.3604	46.0187	54.0403	36.2436	137.932	113.993	174.617	175.643	33.2847	40.8068	26.4693	41.8609
FGF16_GCGCTCGTTCAGGAAACCTG	FGF16	155.408	108.08	122.361	62.6359	146.867	169.877	154.976	134.551	134.032	189.319	171.252	144.667	83.0823	100.115	74.8484	96.3176	103.311	133.041	87.0416	25.4873	135.652	71.5335	108.025	155.331	140.153	167.178	143.38	160.241	97.8213	102.218
CBX8_GGGGACAGCTCGAAGAAGCG	CBX8	389.932	471.385	397.095	289.191	329.509	315.972	286.51	297.028	364.323	408.258	395.129	258.238	410.299	364.055	323.646	412.025	399.77	482.576	428.614	292.396	350.71	232.722	265.598	249.281	319.94	299.792	358.451	422.002	416.604	361.172
NDUFV1_GCTGCCTATATCTACATCCG	NDUFV1	272.67	328.147	371.7	303.851	329.509	287.093	227.906	224.675	255.879	218.94	241.715	169.004	359.171	185.061	259.67	204.943	216.355	229.798	420.042	259.829	370.011	206.97	193.73	229.239	185.531	150.249	136.979	164.222	248.581	204.437
KRTAP19-2_TGTGGCAGCTTCTGCAGACT	KRTAP19-2	128.565	138.03	143.139	129.27	165.696	151.191	183.627	185.325	183.989	166.137	202.47	186.58	149.548	150.173	134.225	162.135	151.973	158.44	70.5565	88.4975	52.386	75.3486	192.837	199.175	207.932	195.394	179.225	136.354	197.944	217.092
SRM_ACTGACTCCTCAGACCCCAT	SRM	178.013	167.98	232.024	158.589	201.471	231.033	227.906	144.706	158.401	132.652	236.364	202.805	207.067	238.153	114.991	128.424	115.29	200.771	94.9545	89.2055	113.043	68.6721	166.501	195.417	146.471	141.079	142.1	96.5428	113.933	107.086
PSMA8_AGTAATAAACAGAGCCCGTG	PSMA8	404.06	552.12	520.611	443.782	395.411	366.935	424.556	420.156	488.608	592.425	607.41	429.946	522.779	556.701	511.394	379.384	463.404	470.481	399.6	505.498	440.594	532.209	392.817	414.634	385.421	456.39	462.145	601.153	562.76	581.184
TIE1_AGACCCACTGTGGATAGACG	TIE1	129.977	152.354	128.133	114.61	143.101	134.203	144.558	214.521	119.41	160.985	220.309	148.723	200.676	166.859	180.222	148.222	196.891	148.764	196.503	253.457	286.193	255.613	122.755	115.246	117.177	106.515	194.587	214.982	111.631	129.477
XYLB_CCGTATGTGAGTAGGCCTCG	XYLB	303.752	390.651	325.526	453.11	367.167	400.911	458.417	318.607	396.004	422.425	416.535	398.849	391.126	336.751	417.729	449.482	396.027	368.886	571.046	678.953	550.88	767.793	448.168	364.527	438.84	400.664	349.489	453.851	456.883	458.522
DEFA1_CCAAGCTTTCGTCCCATGCA	DEFA1	572.183	476.594	446.732	601.038	446.249	484.151	500.091	384.614	424.029	413.41	619.897	559.741	492.103	527.88	572.444	603.591	463.404	477.738	535.438	623.731	422.948	491.197	450.4	483.531	495.131	414.772	517.193	568.309	474.145	502.33
TPD52_AGCATCTAGCAGAGATCAAG	TPD52	679.556	752.654	661.441	531.738	643.955	679.51	602.974	665.141	751.798	676.138	782.23	831.5	562.403	631.029	744.721	723.452	765.852	768.009	738.535	867.276	914.273	758.255	650.379	688.968	670.322	722.324	655.452	893.767	653.676	746.681
ABL1_CTTAGGCTATAATCACAATG	ABL1	275.496	324.24	288.587	222.557	399.177	343.152	342.51	271.641	132.814	127.5	140.926	77.0658	123.984	53.0914	85.7202	68.4925	84.5955	70.1488	86.3822	43.8948	135.652	47.689	116.506	83.9289	107.987	72.6556	25.6036	8.95758	42.581	25.3112
ARHGEF37_TGCAGCCTCCAAGTACACCA	ARHGEF37	214.745	220.067	286.278	230.553	340.807	343.152	334.696	324.954	240.039	285.91	245.283	336.656	286.314	229.051	314.447	306.076	236.568	368.886	309.921	238.589	362.29	313.793	277.203	273.082	288.922	298.382	459.585	360.294	345.252	356.304
HNRNPA2B1_GAAGTTCAGAGTTCTAGGAG	HNRNPA2B1	128.565	117.195	148.911	199.902	188.291	181.769	194.046	166.285	185.208	186.743	240.823	179.82	207.067	188.095	277.65	208.688	247.049	283.014	187.271	185.491	151.092	192.663	176.767	226.733	163.129	189.751	288.041	215.977	165.721	211.251
ADNP_TTGCACATCACTTACGAGAG	ADNP	467.636	391.953	453.658	371.817	380.348	565.692	450.603	445.543	465.457	422.425	448.645	523.236	406.464	488.441	401.422	546.335	422.229	460.805	419.382	235.757	307.147	277.55	466.023	404.612	496.28	466.971	303.403	440.912	528.235	382.589
TPBG_CAGGTTGCGGAAGGACACGT	TPBG	298.1	291.686	222.789	333.169	355.87	287.093	438.882	332.57	313.148	328.41	291.664	319.08	361.728	320.065	360.861	337.112	348.863	385.819	254.531	137.348	161.569	244.168	278.543	284.356	342.916	313.195	313.644	419.016	383.229	338.781
VDR_ACAGCTCTAGGGTCACAGAA	VDR	244.414	217.462	229.715	198.569	214.652	186.865	205.767	248.793	242.476	256.288	313.962	273.11	268.42	227.535	223.291	249.891	253.038	337.44	183.974	278.236	177.009	212.693	269.615	270.577	296.389	303.319	340.528	346.36	275.05	277.45
LNP1_TCGATGCCGTAGCCACGTAC	LNP1	295.275	282.571	272.426	369.152	224.066	234.431	239.627	238.638	221.762	175.152	176.604	236.606	218.57	215.399	260.924	214.574	280.737	217.703	174.083	129.56	114.698	103.008	131.683	189.153	186.105	251.12	281.64	214.982	216.358	188.861
RGPD3_GTAAGTCAGTGGAAAGAAAG	RGPD3	238.763	190.117	192.776	221.224	271.139	227.636	300.836	277.988	79.2007	95.3032	126.655	139.259	115.037	144.105	126.281	140.196	98.0709	131.831	63.9624	63.0102	17.0944	55.3192	151.77	141.552	141.876	154.481	44.8063	42.7973	102.425	51.5959
PRSS21_CAGGCTCACTCCGCATACGT	PRSS21	435.142	341.168	406.33	450.445	438.718	509.632	373.766	336.378	449.616	500.986	418.319	409.666	389.848	439.9	439.891	522.791	541.262	492.251	567.749	463.019	431.219	511.226	516.018	523.616	469.857	468.382	465.986	443.898	428.112	551.006
GSTM2_AGAGTTTGGCCAGCTGCATA	GSTM2	348.961	385.442	436.343	371.817	434.952	431.489	382.882	333.84	309.492	385.077	467.376	354.232	405.186	477.823	506.795	498.176	420.732	478.947	394.325	303.723	411.919	370.066	487.003	387.075	416.438	410.539	501.831	497.643	374.022	378.695
VANGL1_AAATGATTCTACTCGGACAG	VANGL1	717.701	662.804	671.83	550.396	694.793	686.305	517.021	698.144	902.888	664.547	699.279	650.327	681.275	788.787	758.519	695.627	722.431	753.495	625.777	574.172	618.155	604.696	736.085	688.968	759.928	802.033	830.837	817.13	761.855	865.449
PRR20C_GGGGCCCAGCCCTTCTGCCA	PRR20C	541.102	580.768	457.121	503.752	500.854	434.886	455.812	530.589	588.522	643.941	373.722	485.379	549.621	476.306	584.152	505.133	547.251	530.954	484.004	550.101	547.02	590.39	546.372	499.815	526.723	577.012	570.961	584.233	475.296	421.529
MROH7_AGTGGGGTCCTCGATAAAGA	MROH7	223.222	226.577	227.406	97.2855	210.886	229.334	237.022	302.106	220.544	184.167	249.743	206.861	278.645	338.268	162.659	122.537	165.448	118.527	203.757	218.766	209.544	147.836	251.313	236.755	286.625	170	194.587	276.69	125.441	146.026
EVI5_ACTATTGCTCTAAAGTGATG	EVI5	203.443	225.275	193.93	230.553	216.535	214.046	183.627	196.75	279.03	220.228	202.47	171.708	161.052	130.453	212.001	187.284	220.098	205.609	150.345	186.907	182.524	224.138	210.246	159.089	156.811	143.9	208.669	204.034	166.872	145.053
ECE2_TGTGGACTACTCATCAGTCG	ECE2	498.718	307.312	356.693	345.164	372.816	380.525	355.533	423.964	357.013	476.516	377.29	366.401	319.547	368.606	427.765	411.49	428.967	439.035	339.594	508.33	400.339	428.247	391.477	417.139	344.639	442.987	317.485	290.624	383.229	319.311
SRFBP1_TCACTCTCTGGTAACAGTGA	SRFBP1	353.199	264.34	303.593	401.136	282.436	285.394	352.929	303.375	257.098	266.591	261.338	333.952	448.644	386.809	232.908	289.488	306.94	285.433	206.394	221.598	257.518	140.206	261.134	291.872	361.871	313.195	286.76	412.049	407.397	291.079
HNRNPD_CCATGGTGGCGGCGACACAG	HNRNPD	213.332	174.491	200.856	198.569	111.092	127.408	199.255	145.976	141.343	148.106	198.902	181.172	195.563	191.129	186.076	144.476	201.382	129.412	295.414	213.81	313.765	210.785	166.501	124.014	200.465	153.071	213.79	210.005	148.458	162.576
RASAL3_GAGCTAGCACTTCCCACCCG	RASAL3	166.71	154.958	115.435	174.581	188.291	202.154	183.627	211.982	86.5116	127.5	172.144	141.963	144.435	212.366	114.991	128.959	171.437	148.764	154.301	88.4975	76.0975	89.6553	102.222	90.1922	141.876	117.095	147.221	138.345	89.7654	114.874
SHPRH_GTTGAGACCCTACCAAAGAG	SHPRH	387.107	408.881	399.404	381.146	353.987	438.284	362.045	407.462	319.24	490.683	426.346	374.513	392.404	373.157	353.753	364.402	405.011	448.711	489.279	492.754	374.422	474.982	440.579	504.826	469.283	379.502	527.434	472.761	353.307	370.907
GUCY2F_TGCAGTGTTGACCATTACAG	GUCY2F	176.6	144.541	199.702	203.9	205.237	161.384	170.604	233.561	169.368	202.197	206.93	187.932	198.119	257.873	238.344	255.777	249.295	247.94	207.054	354.698	237.116	334.777	212.924	207.943	241.247	237.012	197.148	242.85	103.575	197.622
MAD2L2_TATACTGATTCAGCTCCGGG	MAD2L2	218.984	117.195	191.622	147.927	299.383	242.925	240.929	157.4	112.1	96.5911	93.6535	205.509	98.4206	154.724	50.1777	82.4051	67.377	78.6151	132.541	32.5671	126.278	22.8907	108.471	93.9502	101.668	84.6473	19.2027	12.9387	87.4637	62.3045
TIGD4_ATGGATGCGAAAGCTTGATG	TIGD4	258.542	235.693	259.728	269.201	246.661	249.72	335.999	274.18	316.803	276.894	338.936	355.584	212.179	204.781	296.467	329.62	307.688	267.291	396.963	289.564	340.233	344.314	365.587	338.221	283.178	311.784	275.239	309.534	365.967	187.887
TFAP4_AGGCTCCCCGGACATCTGGG	TFAP4	641.41	556.026	683.374	710.317	702.325	580.981	643.346	685.45	588.522	436.592	643.087	411.018	743.906	444.451	733.012	426.473	696.229	552.724	556.539	390.097	615.398	394.865	700.374	455.972	727.762	451.452	453.184	535.464	563.911	592.866
OR5H15_TGTGGTTACGCCAATTGCAA	OR5H15	501.543	489.616	404.022	503.752	365.284	412.802	378.975	346.533	403.315	472.652	488.782	500.252	388.57	394.393	494.668	399.718	442.442	492.251	348.167	431.868	345.748	334.777	430.313	414.634	412.418	375.975	362.291	355.317	324.536	462.416
PFDN4_AAAAGATAAACAAATTTGCA	PFDN4	293.862	266.945	238.95	178.579	288.085	259.912	227.906	303.375	346.046	352.879	338.045	305.559	259.472	263.94	343.717	364.402	367.579	313.251	290.139	181.951	225.535	240.352	345.054	358.264	395.76	297.676	419.899	469.775	287.71	380.642
HELZ2_GGGGCCATAGATGAGTAGCG	HELZ2	189.315	317.729	236.641	334.502	333.275	307.478	295.627	341.456	381.382	383.789	383.533	321.784	384.735	449.002	365.879	323.199	278.492	314.46	265.081	366.026	260.827	357.667	330.769	305.651	279.157	323.07	321.325	266.737	313.028	328.072
PCF11_TGGCTTATCCTGTTCAGACG	PCF11	80.5295	115.893	111.972	114.61	131.804	178.371	126.325	64.737	115.755	39.9243	95.4374	73.0097	75.4132	59.159	92.4106	107.555	91.3332	111.271	63.303	48.1427	49.0774	41.0125	123.202	98.9609	47.675	120.622	26.8838	68.6748	57.5419	95.4038
TRPC5_AAAAACGGGTCACTATCCCA	TRPC5	531.212	658.898	547.161	573.051	523.449	504.536	492.277	496.317	522.725	597.577	584.219	497.548	522.779	497.542	526.866	502.992	616.125	500.718	478.729	491.338	546.469	392.957	524.946	576.228	541.083	515.643	631.129	798.22	576.57	555.873
ST3GAL3_AAGGAGTCATCCAGGAACAT	ST3GAL3	231.699	287.779	262.037	239.882	195.823	246.322	251.348	266.564	190.082	215.076	205.146	163.596	233.909	195.68	211.583	220.46	244.803	197.142	238.046	395.761	229.947	285.18	233.904	170.363	209.655	255.353	241.954	167.208	202.548	173.284
RPS6KA4_CTTGCTACGGATGATTTCGG	RPS6KA4	221.809	101.569	105.046	126.604	139.335	163.082	161.488	173.901	93.8224	95.3032	124.871	118.979	135.488	104.666	168.513	151.968	156.464	145.136	186.612	239.297	187.487	200.294	163.376	157.836	205.634	186.224	87.0523	127.397	170.324	111.953
NAP1L5_TCTTGGATCTTGGCGAGTAG	NAP1L5	200.617	169.282	195.085	270.534	131.804	181.769	175.813	167.555	154.746	194.47	223.876	286.631	256.916	188.095	221.618	231.697	161.705	226.17	212.988	325.671	163.224	315.701	174.982	189.153	145.323	160.83	140.82	204.034	207.151	145.053
LAPTM4A_AACATTCAGTATGAAGTCAT	LAPTM4A	228.873	227.88	198.548	193.238	207.12	174.974	226.604	213.251	333.862	282.046	265.798	267.702	251.803	159.274	235.417	237.584	235.819	239.474	268.378	241.421	320.382	317.609	339.697	328.2	225.738	268.755	282.92	359.299	258.939	321.258
SEC24D_GATGCCACATTGTTGACAGG	SEC24D	276.908	294.29	283.969	375.815	353.987	263.31	339.906	289.412	318.021	305.228	370.154	354.232	370.675	303.379	313.611	399.183	296.459	368.886	426.636	378.769	499.597	412.987	369.605	385.822	326.258	347.054	377.653	366.266	382.078	276.476
SLC25A12_TCTGATACCACAACTTATAG	SLC25A12	117.262	78.1302	79.65	71.9646	124.272	117.215	53.3951	81.2385	71.8899	94.0153	74.9228	54.0813	72.8568	62.1928	85.7202	109.695	107.803	70.1488	114.077	116.109	136.204	63.9032	134.807	78.9182	137.281	55.7261	35.8451	45.7832	170.324	86.6422
ZNF132_GCATCAGAAAGTTCACACAC	ZNF132	536.863	518.263	517.148	471.768	608.18	533.415	418.045	351.611	458.146	556.365	453.997	497.548	446.088	405.012	436.964	478.378	491.852	477.738	437.186	532.401	477.54	462.583	509.769	600.029	448.03	543.859	573.521	583.238	528.235	529.588
IKBKAP_TGGACGACTGACCGGAGCGT	IKBKAP	226.048	234.39	181.233	230.553	218.417	232.732	220.092	201.827	177.897	307.804	165.9	183.876	136.766	150.173	126.699	189.96	145.983	194.723	94.9545	91.3294	74.9947	123.038	142.396	226.733	143.599	162.241	142.1	150.288	163.419	182.046
HK1_GCAGACGCACAACAATGCCG	HK1	152.582	136.728	122.361	154.591	118.623	139.299	113.302	142.167	110.881	128.788	75.8147	129.795	112.481	172.926	110.809	109.695	113.792	117.318	115.396	122.481	86.0233	98.2393	99.0969	137.794	137.281	134.025	64.009	116.449	126.592	184.967
MEF2BNB-MEF2B_GAGTCACTTACATACAGCCG	MEF2BNB-MEF2B	562.294	434.925	521.765	517.079	497.088	460.368	503.998	548.36	472.767	421.137	484.322	467.803	492.103	415.63	470.834	476.772	539.764	510.393	356.739	421.248	438.939	397.726	506.198	442.192	520.404	439.461	465.986	453.851	445.374	501.357
ARMC1_CTGCTGCTAGATCCCGTAAC	ARMC1	251.478	261.736	313.982	318.51	265.49	242.925	332.092	270.372	275.375	340.001	360.343	358.288	437.141	429.282	426.51	401.859	422.229	387.028	446.418	405.673	458.791	448.276	325.413	328.2	296.964	314.606	400.697	359.299	359.062	301.788
LRRC4B_GGGCGTCAGCCAGTTGACGG	LRRC4B	228.873	255.225	197.393	210.563	184.525	254.816	186.232	171.363	253.442	181.591	231.904	247.422	161.052	210.849	223.291	244.005	232.825	244.311	304.646	303.723	352.916	317.609	291.934	211.701	326.258	328.008	180.505	169.199	234.771	193.728
SMIM5_GGCTGCCACCGACTTCGTGC	SMIM5	300.926	319.032	279.352	343.831	259.841	275.201	300.836	304.645	305.837	376.061	418.319	370.457	392.404	412.596	410.203	350.489	319.666	321.717	417.404	506.206	521.103	524.579	405.762	373.296	469.857	419.004	268.838	311.525	359.062	359.225
PCDHB16_CGTGAATGACAATCCCCCAC	PCDHB16	161.059	111.987	129.287	201.234	154.399	159.685	153.674	93.9321	171.805	179.016	181.063	239.31	180.225	109.217	99.5191	118.257	98.8196	79.8245	85.7228	103.365	49.6288	143.067	156.234	134.036	183.233	121.328	116.496	176.166	149.609	95.4038
ZC3H15_TTTGGTAACATTTGGACCTA	ZC3H15	121.501	165.376	102.737	74.6299	118.623	142.697	169.302	119.319	160.838	119.773	115.952	152.78	118.872	94.0476	189.839	133.775	178.923	124.575	201.119	176.287	265.79	136.39	110.703	181.637	101.094	125.56	151.061	149.293	164.57	112.927
PRAMEF10_GTTCTTGACCATCTTCACCC	PRAMEF10	637.172	634.157	706.46	661.008	645.838	631.944	670.695	609.289	675.034	495.834	447.753	458.339	549.621	546.083	517.248	452.158	461.158	453.548	559.836	509.746	528.271	449.23	470.933	463.488	496.28	391.494	371.252	423.992	544.347	427.37
TRAPPC2_GCCACATGTTCTCATCTACG	TRAPPC2	168.123	201.836	158.146	171.915	220.3	244.623	167.999	138.359	153.528	65.6819	68.6792	90.5861	83.0823	71.2942	99.5191	92.572	94.3278	82.2435	75.1723	47.4347	88.7805	82.9788	92.4012	57.6228	119.475	72.6556	51.2072	64.6936	63.2961	184.967
CAND2_TTGGCATAGTCCACACACGG	CAND2	173.774	203.138	175.461	191.906	271.139	215.744	257.859	247.524	165.712	203.485	159.657	255.534	196.841	221.467	160.987	122.002	156.464	180.21	211.01	185.491	211.75	213.647	188.82	268.071	217.122	239.834	325.166	212.991	201.397	179.126
FITM1_TGGCTGGCGAAGATAGTCCG	FITM1	125.739	162.771	114.28	138.598	118.623	181.769	209.674	138.359	118.192	110.758	125.763	113.571	90.7514	122.869	145.515	115.046	146.732	110.061	189.909	145.136	167.084	82.025	137.932	149.068	126.942	160.124	129.298	120.43	143.855	133.371
KRT6C_CCACATCTCAGACACATCCG	KRT6C	406.886	273.456	323.217	207.898	348.338	344.851	388.091	357.957	421.592	426.289	365.695	415.074	274.811	327.65	297.303	343.533	316.672	385.819	335.638	332.043	372.768	308.071	286.578	459.73	391.165	399.958	345.649	336.407	342.95	368.96
HNRNPF_GATAGGGCACAGGTACATTG	HNRNPF	874.522	757.863	749.171	772.953	775.758	745.762	686.323	700.682	538.565	727.653	857.153	586.782	617.365	623.445	669.454	603.055	771.841	517.65	527.525	925.33	490.223	768.746	582.975	717.78	601.395	818.963	741.225	607.125	802.134	498.436
Non-Targeting_CACGCCAACTAAAACTGCAG	Non-Targeting	404.06	488.314	413.256	510.416	515.917	372.032	425.859	531.859	415.499	520.304	500.377	640.863	541.952	573.387	659	641.583	610.885	591.427	535.438	686.033	533.234	622.818	543.694	607.545	578.993	553.734	629.849	623.049	437.319	515.959
OPN1SW_ACCACGTATAGGACTCGCTG	OPN1SW	531.212	429.716	467.511	471.768	414.24	479.054	591.253	476.007	420.373	495.834	559.245	512.42	538.118	497.542	603.387	486.404	528.535	480.157	521.59	509.038	515.037	472.121	561.995	592.513	565.207	536.805	432.701	554.375	470.693	496.489
MPST_CAAGCAGTGACACGGCGTGG	MPST	391.345	424.507	393.632	589.044	389.762	499.44	539.16	472.199	447.18	526.743	318.422	404.258	402.63	391.359	410.621	508.343	346.617	541.839	505.105	676.121	560.806	559.869	487.45	463.488	553.145	400.664	446.783	435.936	413.151	544.191
THBS3_GAGTGAGTGTCCATTCCAAG	THBS3	227.46	286.477	294.359	289.191	314.446	251.419	268.278	283.066	151.091	191.894	221.201	219.029	201.954	229.051	221.2	267.014	209.617	211.656	184.634	351.866	204.03	318.562	293.273	269.324	327.407	265.934	166.423	175.17	195.643	217.092
MOB1B_ATGCAGATATGAGTATCATT	MOB1B	264.193	138.03	203.165	91.9548	205.237	151.191	123.72	192.942	185.208	117.197	206.93	128.443	157.217	180.511	179.803	130.029	147.481	176.582	139.135	106.905	136.204	216.508	202.211	166.605	199.89	196.805	198.428	179.152	219.81	188.861
TTN_AGAACCTGCAACAATCACCG	TTN	288.211	306.01	248.185	198.569	329.509	220.841	278.696	356.688	300.963	229.243	270.257	273.11	371.953	286.694	213.255	241.329	266.513	201.98	251.234	286.732	264.136	332.869	247.742	207.943	279.157	181.286	322.606	285.647	363.665	331.966
FOXF1_AAGGCCAAGAAGACCAACGC	FOXF1	218.984	207.045	174.306	227.888	158.164	193.66	153.674	161.208	212.014	216.364	182.847	227.141	150.826	188.095	170.186	201.197	141.492	203.19	232.111	278.236	266.341	330.008	149.984	177.879	149.343	114.274	192.027	143.321	165.721	173.284
MRPL14_GATGACGCGGGTACGAGTGG	MRPL14	210.507	315.125	171.998	265.203	321.977	275.201	278.696	206.904	222.981	167.425	191.767	227.141	219.849	177.477	191.512	148.757	161.705	206.818	100.889	50.2666	107.529	75.3486	122.755	127.772	163.703	142.49	49.927	49.7643	192.19	108.059
LRRC74A_GAGTCGGAGGACTTCCCCTA	LRRC74A	348.961	263.038	365.928	362.488	397.294	480.753	393.301	467.122	489.826	454.622	448.645	394.793	379.622	408.045	468.743	388.481	388.541	422.102	334.319	321.423	275.164	331.915	406.654	359.516	411.269	376.68	430.141	352.331	383.229	481.887
FAM160A1_GGAGTCGCCATCATACAGGG	FAM160A1	161.059	148.447	139.676	151.925	156.281	151.191	114.604	163.746	147.435	106.894	110.6	143.315	180.225	192.646	162.659	168.021	139.246	117.318	149.026	113.277	181.972	130.668	159.359	152.826	188.977	123.444	101.134	107.491	108.179	148.947
RAB17_AGAACCAGCTTGAACACACG	RAB17	409.711	489.616	415.565	449.112	532.863	433.187	405.022	463.314	537.347	497.122	372.83	389.385	530.449	570.353	403.094	418.982	490.355	478.947	521.59	407.797	368.908	450.184	442.365	473.509	478.473	564.315	515.913	432.95	451.129	453.655
Non-Targeting_CCTAGTTCATAAGCTACGCC	Non-Targeting	644.236	584.674	689.145	645.016	625.126	582.679	686.323	656.255	519.069	691.592	703.739	792.291	618.644	731.144	904.035	777.497	812.267	846.624	709.521	1035.77	817.221	910.86	721.354	612.556	726.613	768.88	963.976	811.159	674.391	805.091
CLCN5_GAGCTCAAAGAGATGCCATG	CLCN5	279.734	339.866	250.493	323.841	335.158	227.636	263.069	283.066	292.433	234.394	329.125	293.391	339.998	426.248	309.429	280.926	318.918	264.872	400.919	275.404	340.233	283.273	269.615	335.716	286.05	334.357	336.688	318.492	354.458	302.761
RAD50_CTAGGAACGTGAGTTAAGCA	RAD50	76.2911	79.4323	124.669	161.254	163.813	137.601	134.139	118.05	107.226	184.167	90.9777	94.6422	115.037	127.419	96.1739	124.143	68.1256	123.365	242.662	235.757	250.35	153.559	105.793	81.4235	104.54	76.888	49.927	53.7455	128.894	137.265
EEF1A1_CATCTGATCTATAAATGCGG	EEF1A1	114.437	100.267	111.972	53.3071	150.633	146.095	109.395	147.245	71.8899	37.3486	36.5695	48.6731	43.4584	39.4393	41.8147	39.5973	35.9344	32.6555	28.3545	7.0798	8.8229	17.168	23.6583	12.5267	29.8687	23.9834	2.56036	5.97172	35.676	14.6026
ACOT1_GGGGGAACCTTACGCTACAA	ACOT1	83.3551	46.8781	87.7304	119.941	107.326	122.312	83.3485	71.0837	79.2007	99.1669	100.789	155.484	90.7514	138.038	65.6491	125.213	92.8305	85.8718	56.7089	32.5671	41.3574	53.4117	89.2765	126.52	86.7341	106.515	119.057	126.401	112.782	55.49
OR2Y1_GATCCAGACAGGTCTCGCAA	OR2Y1	452.095	463.572	573.711	529.073	555.458	633.643	544.37	552.168	526.38	508.713	528.027	620.583	540.674	553.667	644.783	581.116	614.628	633.758	469.497	412.044	566.872	515.995	559.764	569.965	476.176	584.772	573.521	578.262	514.425	519.853
PRRX1_CCGCCGGGTGAACCTCACCG	PRRX1	508.607	487.011	480.208	367.819	508.385	485.849	454.51	534.397	444.743	459.774	411.183	444.818	572.629	597.657	553.209	488.544	531.53	522.488	459.606	528.861	433.425	461.629	588.778	539.901	543.38	367.51	542.797	581.247	589.229	608.443
ZDHHC17_TATTGATGGCAGCCCAATGG	ZDHHC17	211.92	117.195	108.509	141.264	141.218	132.504	175.813	112.972	119.41	167.425	156.089	178.468	120.15	135.004	144.679	112.371	136.251	107.642	187.271	169.207	153.298	229.861	149.984	130.278	93.0525	131.203	108.815	67.6795	182.983	107.086
PHF23_AGTTAAAAAAGGCAGAACGG	PHF23	90.4191	78.1302	123.515	259.872	69.6676	96.8301	128.93	110.434	110.881	160.985	68.6792	102.754	58.7967	72.8111	111.645	93.1071	58.3934	136.669	85.0634	96.9933	87.6776	90.6091	86.1518	119.004	97.0732	81.1203	60.1685	129.387	84.0112	108.059
MAP6_CCTCAACCGGCAAATCCGCG	MAP6	330.595	260.434	252.802	391.807	384.113	327.863	388.091	379.536	398.441	413.41	447.753	367.753	368.119	356.471	418.984	388.481	379.557	419.684	484.004	375.937	486.914	366.251	300.415	343.232	414.715	310.373	332.847	387.167	295.765	340.728
CTRB1_TGGCACACAGTGTCCCCGCG	CTRB1	252.891	227.88	341.687	299.852	323.86	394.116	350.324	394.769	335.08	388.94	249.743	331.248	324.66	368.606	265.942	258.987	284.481	241.893	230.792	376.645	216.713	200.294	291.934	278.093	367.04	362.573	321.325	298.586	374.022	440.999
ZNF324_AAAAGCCTGCAGAGACAACG	ZNF324	664.015	700.567	669.521	614.364	685.379	708.389	781.392	779.382	828.562	799.774	737.633	665.2	646.764	597.657	730.085	685.461	671.524	707.536	767.549	717.892	749.947	823.112	829.825	819.246	777.16	763.236	797.553	961.447	789.475	918.992
RPL41_TTGTGATCGGTTGCTAGTGG	RPL41	302.339	368.514	298.976	395.805	340.807	348.249	334.696	225.945	281.467	229.243	201.578	278.519	139.323	235.119	209.492	267.014	199.136	217.703	185.293	155.048	223.881	69.6259	328.984	354.506	295.24	294.149	144.66	208.015	166.872	219.039
MAP3K10_AGAACGTGAGATGGACATCG	MAP3K10	740.306	783.906	820.741	723.644	636.423	757.653	703.253	662.602	802.974	763.714	542.298	686.832	713.23	719.009	777.754	770.006	758.365	896.212	551.923	619.483	738.918	667.646	776.259	686.463	670.322	738.548	751.466	728.55	850.47	826.508
FAM222A_AGCCACCCAAGCCTTGACGT	FAM222A	156.821	126.31	116.589	98.6181	152.516	157.986	162.79	119.319	181.552	163.561	152.521	196.045	196.841	138.038	129.626	160.529	135.503	143.926	104.846	118.233	122.418	132.575	163.376	171.616	149.918	153.776	143.38	166.213	181.832	203.463
ZNF57_CAAATGCGAGCAGTGTCGGA	ZNF57	378.63	378.931	442.115	430.455	468.844	421.296	414.138	437.927	465.457	423.713	472.727	419.13	384.735	415.63	408.112	454.833	417.737	403.961	507.743	580.544	592.237	629.495	394.156	434.676	380.826	416.183	311.084	277.685	399.341	377.721
TRMT61B_TTTACTTAAGTTGGATCACA	TRMT61B	267.019	313.823	270.117	273.199	259.841	225.937	304.743	274.18	346.046	265.304	297.015	354.232	325.938	216.916	289.776	337.112	300.202	316.879	305.305	331.335	342.439	270.873	331.216	382.064	303.282	349.17	366.132	381.195	371.721	328.072
CNTRL_CAAACAAACAAGGTTCCTTG	CNTRL	480.351	434.925	447.887	321.175	419.889	406.007	386.789	451.889	514.196	486.819	401.372	462.395	460.148	474.789	483.797	432.359	509.071	544.258	495.214	587.624	402.545	534.117	389.245	331.958	388.867	368.216	337.968	450.865	453.43	376.748
GJA1_TGAGCCAGGTACAAGAGTGT	GJA1	673.905	660.2	609.495	559.725	578.053	565.692	562.602	455.697	522.725	569.244	705.523	682.776	656.989	570.353	628.894	622.319	571.207	558.772	523.569	529.569	685.429	473.075	645.915	680.2	628.391	557.261	622.168	488.686	606.492	575.343
CLEC12B_GGAGCAAGGAATAACCGAGA	CLEC12B	165.297	296.895	265.5	181.244	291.851	225.937	263.069	261.487	282.686	360.607	301.475	319.08	357.893	344.336	263.851	292.164	315.175	353.163	307.283	235.049	190.795	358.621	333.448	246.776	307.303	289.212	323.886	468.78	303.821	273.556
ARMC12_GTCATCCGTAGTACAAGCAG	ARMC12	310.816	276.06	385.552	517.079	453.781	395.814	462.324	429.041	247.35	314.243	272.041	362.345	224.961	339.785	334.1	290.558	285.978	268.501	271.675	251.333	334.167	240.352	345.5	395.844	329.13	438.755	267.558	280.671	359.062	324.178
DCDC2_AGGAGTAAGACTTACCCAAA	DCDC2	234.524	218.764	235.487	169.25	224.066	263.31	255.255	246.254	331.425	350.304	298.799	255.534	291.427	297.312	263.851	296.444	299.453	302.366	287.501	297.352	292.259	326.193	204.443	268.071	313.621	275.809	245.795	235.883	399.341	294.973
IL24_GGTTGTTCCCCAGAAACTGT	IL24	168.123	178.397	220.48	131.935	193.94	219.142	151.069	115.511	95.0409	104.318	142.71	170.356	186.616	195.68	142.17	147.687	104.809	152.392	214.966	223.722	213.404	265.151	201.765	167.858	184.382	153.776	112.656	112.467	74.8045	123.636
TMEM95_CTGACAAGTCGTGGGCTGGG	TMEM95	203.443	125.008	170.843	142.597	169.462	190.263	184.929	194.211	130.377	149.394	188.199	187.932	182.781	224.501	145.933	120.932	148.229	145.136	135.178	146.552	263.584	142.113	122.309	165.352	120.624	172.116	236.833	168.203	125.441	117.794
KLF9_CTTTCCCACAGCCACTGTAG	KLF9	333.42	391.953	425.954	519.744	259.841	295.587	381.58	330.032	314.366	387.652	383.533	344.768	379.622	436.866	426.928	353.7	356.349	390.656	410.81	426.204	560.806	490.243	394.602	432.171	441.138	420.415	522.314	465.794	294.615	336.834
GRB14_TCTCGAGCCGTTATGTCACT	GRB14	1.4128	9.11519	10.3891	5.33071	7.53164	0	10.4186	2.5387	0	7.72729	24.0823	16.2244	0	0	0	0	0	0	0	3.5399	0	3.81512	1.33915	5.01068	0	7.05394	40.9658	45.7832	3.45252	2.92052
LENG8_GGGGCTCACACGCTGAACAG	LENG8	87.5935	115.893	72.7239	85.2914	124.272	149.492	148.464	123.127	70.6714	64.3941	59.7599	79.7699	108.646	95.5645	95.7558	60.4661	103.311	61.6826	60.006	82.1257	115.801	81.0713	79.4561	95.2029	90.7549	111.452	46.0865	81.6135	94.3688	106.112
ITGB5_ATGTGCCTGGTGCTCCAAAG	ITGB5	724.765	794.323	866.915	871.571	679.73	721.979	696.741	684.181	732.302	864.168	1061.41	931.55	842.327	1004.19	843.821	817.095	790.557	925.239	909.321	935.242	953.976	918.49	849.019	947.018	905.251	958.631	809.074	778.314	891.9	773.939
FHOD1_TTCACTGCACGGATGAACAG	FHOD1	275.496	285.175	237.796	389.142	269.256	242.925	356.836	297.028	257.098	233.107	274.717	350.176	279.923	330.684	211.164	207.083	240.311	226.17	306.624	309.387	323.139	313.793	365.587	338.221	295.815	368.216	297.002	237.874	247.43	304.708
GPIHBP1_CCACTTACCGGTGTTCCCGT	GPIHBP1	139.867	117.195	116.589	170.583	107.326	130.806	98.9763	76.1611	106.007	126.212	145.386	136.555	103.533	112.25	116.245	148.757	108.552	142.717	104.186	128.852	173.701	130.668	96.4186	101.466	94.7756	95.9336	87.0523	60.7125	85.162	127.53
SKI_AGTGCTTCGGCAAGTGTAAG	SKI	240.176	276.06	211.246	190.573	235.364	207.25	261.766	196.75	257.098	193.182	307.719	281.223	379.622	229.051	229.145	274.505	235.071	223.751	219.582	208.854	242.078	152.605	277.203	254.292	296.964	258.174	189.467	228.916	290.011	258.953
ISX_GCAGCTGAGTGAAGCCAGTG	ISX	250.065	221.369	174.306	233.219	233.481	207.25	268.278	200.558	242.476	319.395	184.631	231.197	293.984	157.757	195.693	195.846	180.421	174.163	234.749	209.562	188.038	137.344	196.408	206.691	180.935	236.307	125.458	189.104	257.788	214.172
LHCGR_TAGCCCATAATATCTTCACA	LHCGR	234.524	194.023	212.4	218.559	176.993	266.708	223.999	279.258	315.584	360.607	278.285	266.35	343.833	230.568	247.125	260.058	288.972	314.46	292.117	264.785	325.345	225.092	260.241	251.787	246.991	322.365	297.002	316.501	243.978	326.125
FKBP2_CAAAAGGAAGCTGCAGATCG	FKBP2	310.816	330.751	347.458	277.197	259.841	292.189	311.254	275.449	304.618	255.001	303.259	269.054	233.909	175.96	283.086	273.435	270.257	264.872	188.59	321.423	194.104	226.046	273.632	358.264	317.068	378.797	267.558	269.723	235.922	223.907
MTMR14_TTTGAAGCATATTACCTCCG	MTMR14	230.286	230.484	248.185	262.537	201.471	236.13	197.953	189.133	192.519	198.334	160.549	193.341	205.788	218.433	235.417	225.276	211.863	251.568	174.743	138.764	163.775	100.147	223.638	245.523	269.393	253.236	203.549	319.487	255.486	257.006
LAMA2_AAGCTGTTTGGAGAGTCCCG	LAMA2	556.642	556.026	645.28	494.423	709.857	616.655	726.695	606.75	549.531	457.198	536.947	611.118	509.998	682.604	639.347	619.108	655.803	568.447	583.575	464.435	596.097	389.142	682.519	573.723	655.962	613.693	590.163	542.431	551.252	603.575
BLVRB_AACATCTCCCACTACCACGT	BLVRB	223.222	156.26	228.561	195.904	216.535	258.214	277.394	294.49	258.316	218.94	271.149	252.83	276.089	294.278	270.96	266.479	283.732	238.264	261.784	149.384	350.159	230.815	225.869	254.292	182.084	178.465	252.196	121.425	253.184	159.655
GUCA2B_GGACCACGGCCACTCCTGGC	GUCA2B	703.573	688.848	692.608	800.939	694.793	677.811	670.695	729.878	686	755.986	617.221	676.016	593.08	758.449	739.285	686.531	676.764	660.367	809.092	714.352	855.27	642.847	628.506	691.474	669.173	833.07	805.234	911.683	696.257	743.76
HIRA_ATGTCTGAAACGGCCGCTGG	HIRA	678.143	587.278	578.328	433.12	826.597	788.231	700.648	634.676	455.709	381.213	438.834	370.457	444.81	351.92	279.741	264.874	247.798	302.366	172.105	179.119	243.733	160.235	431.652	409.623	484.792	433.112	71.6901	126.401	408.548	334.887
POU2F3_ATCACAGTGTTACCTGACAT	POU2F3	365.915	354.19	413.256	367.819	357.753	394.116	446.696	382.075	297.307	302.652	283.636	379.921	345.111	408.045	400.167	421.657	425.972	419.684	493.236	558.596	519.448	517.902	390.138	393.338	344.639	330.83	352.05	288.633	339.497	295.946
Non-Targeting_CGGTGTGCCCCCAAATATTG	Non-Targeting	857.568	671.919	689.145	557.059	638.306	575.884	666.788	769.228	681.126	661.971	834.854	724.689	671.049	925.307	810.37	952.474	799.54	927.658	985.153	944.446	947.911	838.372	894.104	774.15	774.863	715.27	962.696	889.786	720.425	773.939
ADAP1_CAGGTGCTCGATCTTCATCA	ADAP1	134.216	136.728	174.306	170.583	150.633	122.312	126.325	124.397	140.124	122.349	166.792	223.085	118.872	121.352	129.626	169.091	119.781	130.622	152.982	89.2055	211.75	89.6553	209.8	164.1	122.921	133.319	160.023	205.029	130.045	156.735
TAB1_GTTGAGAAGGACCGCCACAA	TAB1	307.99	341.168	273.58	321.175	278.671	295.587	233.115	248.793	219.325	288.485	251.527	254.182	255.638	307.93	292.703	317.313	262.022	309.622	343.551	483.55	303.839	413.94	324.52	300.641	237.226	329.419	323.886	264.746	288.86	240.457
NAP1L1_CTTGCTCAGTGATATGGTTC	NAP1L1	310.816	261.736	238.95	309.181	192.057	232.732	240.929	223.406	246.132	239.546	188.199	229.845	348.946	304.896	275.559	246.68	288.972	246.73	323.109	232.217	259.173	323.331	289.256	270.577	305.005	244.772	273.959	199.057	296.916	218.066
HMGN3_CCTCTGCTAATCTTTGCTCC	HMGN3	639.997	699.265	742.245	677	642.072	704.991	666.788	575.017	682.345	719.926	712.659	631.399	734.959	720.526	738.866	764.12	781.573	795.826	852.612	923.206	902.693	1004.33	609.758	621.324	601.395	605.228	884.605	808.173	810.19	709.687
CLPX_GGCCAACAACATACTTGTCG	CLPX	292.449	274.758	234.332	321.175	257.959	355.044	253.952	275.449	263.19	155.834	162.333	260.942	194.285	353.437	201.547	294.304	172.934	297.528	209.691	109.029	172.047	158.327	240.6	249.281	267.669	213.029	144.66	180.147	268.145	260.9
CHMP3_GCCCTTACCAGTTCTTTGGG	CHMP3	336.246	442.738	432.88	429.122	540.395	750.858	429.766	443.004	386.256	399.243	234.58	331.248	223.683	175.96	225.381	230.092	214.858	220.122	381.137	375.229	416.331	354.806	320.949	350.748	300.41	261.701	135.699	118.439	116.235	136.291
FBXO34_ATGTTCTGTGCAGTATGAGT	FBXO34	281.147	345.075	293.204	342.498	280.553	309.177	316.464	286.874	333.862	378.637	275.609	246.07	331.051	357.988	405.185	252.031	458.163	301.156	271.675	294.52	341.336	218.416	253.099	211.701	197.018	210.207	409.658	348.35	322.235	249.218
H1F0_GGTCTGCTTGAGGACACCGG	H1F0	104.547	95.0584	102.737	171.915	120.506	147.793	154.976	126.935	118.192	115.909	154.305	160.892	108.646	71.2942	117.918	77.0541	151.973	106.433	235.408	167.791	195.758	213.647	132.129	111.488	130.963	129.793	88.3325	91.5664	109.33	161.602
ACLY_CGGTCACCTGTACACGACAG	ACLY	125.739	102.871	117.743	177.246	180.759	154.588	105.488	100.279	162.057	136.515	97.2213	117.627	145.714	142.588	124.19	120.397	134.754	117.318	130.562	106.905	202.375	85.8402	74.9922	126.52	92.4781	70.5394	72.9703	100.524	104.726	124.609
ERMP1_AAGATGTTGACAAGACGCGA	ERMP1	541.102	544.307	514.839	566.388	440.601	385.622	432.37	456.967	400.878	652.956	627.924	552.981	631.426	549.117	536.483	450.553	628.852	486.204	726.666	690.989	687.084	692.444	527.624	516.1	510.64	544.564	636.25	573.285	618	708.714
RAB40C_ATGACGTTGAAGTTGCACAG	RAB40C	665.428	763.071	622.193	710.317	711.74	732.172	711.067	660.063	789.57	732.804	776.878	712.521	858.943	819.124	891.49	706.329	822.748	841.786	885.583	604.615	925.853	854.587	887.855	724.043	953.5	826.016	747.625	586.224	799.833	760.31
CACYBP_TGCAGGTGCATTTCACAGAG	CACYBP	519.91	489.616	574.865	501.087	482.025	541.909	384.184	481.085	509.322	479.092	442.401	374.513	462.705	676.536	435.291	491.755	420.732	541.839	433.23	398.593	399.788	416.802	542.355	440.94	591.055	428.174	385.334	416.03	448.827	436.132
AUP1_GTGTCCCCAGATTCGTAGTG	AUP1	577.834	623.739	677.602	585.045	753.164	596.27	741.02	571.209	732.302	593.713	611.87	681.424	602.027	737.212	638.093	842.779	555.486	772.847	696.992	529.569	682.121	588.482	725.818	764.129	670.322	725.85	561.999	705.658	606.492	791.462
Non-Targeting_GCCGTGTTGCTGGATACGCC	Non-Targeting	562.294	627.646	714.541	879.567	689.145	541.909	617.3	502.664	534.91	656.819	549.434	561.093	832.101	755.415	652.728	599.845	658.797	562.4	613.907	591.871	643.521	474.982	746.798	732.812	690.426	691.992	649.052	701.677	710.067	599.681
ZDHHC3_GCCGTCACGGATAAACCACA	ZDHHC3	166.71	123.706	193.93	155.923	171.345	186.865	162.79	171.363	209.577	197.046	169.468	144.667	240.3	207.815	216.182	232.768	224.59	189.886	200.46	198.942	188.038	185.987	175.428	207.943	138.43	222.199	197.148	248.822	159.967	200.543
C7orf25_GCTCTTCATAACATCTGGCT	C7orf25	145.518	238.297	167.38	171.915	199.588	183.468	195.348	171.363	181.552	252.425	189.091	214.973	221.127	280.626	218.273	195.311	179.672	175.372	369.927	498.418	360.085	385.327	219.62	253.039	210.804	213.029	174.105	234.888	220.961	281.344
TMEM38B_ATAGCTATTGGATGGGCCCG	TMEM38B	138.454	161.469	155.837	134.6	154.399	110.42	149.767	153.592	170.586	136.515	119.52	91.9382	169.999	166.859	154.296	191.03	160.956	170.534	172.105	166.375	88.229	111.592	168.286	161.594	164.852	135.436	209.95	117.444	184.134	106.112
C1orf123_GACAGTGTGGCACTGAAGGG	C1orf123	268.432	264.34	308.211	355.825	331.392	275.201	311.254	396.038	277.812	221.516	372.83	283.927	272.254	233.602	259.67	187.284	240.311	238.264	160.236	106.197	102.015	121.13	240.6	220.47	250.437	261.701	226.592	158.251	232.469	281.344
PGD_TTCGTGAAGATGGTGCACAA	PGD	237.35	272.153	230.869	241.215	282.436	244.623	326.882	211.982	339.954	105.606	156.981	213.621	290.149	166.859	168.932	131.634	138.497	133.041	89.6793	31.8591	95.3976	33.3823	162.483	127.772	170.022	106.515	79.3712	26.8727	255.486	183.993
GTF3C2_TTGGATTGATCTAAGAGACC	GTF3C2	180.838	100.267	125.824	138.598	112.975	107.023	102.883	109.164	154.746	86.2881	57.976	89.2341	104.812	109.217	67.7399	94.1772	95.0764	114.899	148.366	97.7013	152.747	154.512	65.1718	56.3701	43.0798	77.5933	29.4442	44.7879	96.6704	94.4303
SIX1_GCTGAAGGCGCATTACGTGG	SIX1	432.316	316.427	412.102	599.705	451.898	411.103	520.928	524.243	403.315	397.955	467.376	436.706	373.231	429.282	405.603	403.464	328.65	474.109	456.309	329.919	397.031	307.117	390.138	341.979	434.245	412.656	512.072	478.733	529.386	402.059
KIF6_CAGTAGATTAGAGGTTGGCG	KIF6	72.0527	136.728	116.589	151.925	150.633	105.324	97.674	181.517	132.814	149.394	120.412	98.6983	106.09	159.274	167.259	165.345	154.967	125.784	168.808	201.066	146.129	119.222	143.289	120.256	133.26	112.863	143.38	198.062	158.816	134.344
PLCH1_GAAGTTGCCTTATCACCTTG	PLCH1	145.518	122.404	234.332	191.906	248.544	210.648	212.278	140.898	157.183	122.349	204.254	158.188	127.819	135.004	191.093	210.829	214.858	172.953	124.628	83.5417	118.006	122.084	137.039	151.573	150.492	153.776	158.742	117.444	196.793	218.066
AKIRIN1_GCGGCCCATGGAGTTCGAGG	AKIRIN1	163.885	123.706	176.615	110.612	160.047	127.408	169.302	139.629	119.41	105.606	140.034	131.147	97.1424	98.5983	111.227	104.344	94.3278	101.595	107.483	53.8065	44.1145	33.3823	75.4386	22.5481	67.7789	52.1992	75.5307	81.6135	92.0671	102.218
SERPINA7_GGAACAATACTATCACCTAG	SERPINA7	279.734	322.938	307.056	302.518	303.148	356.743	293.022	291.951	282.686	367.046	305.043	302.855	375.788	341.302	287.267	269.689	305.442	263.663	315.196	276.112	292.259	262.289	352.642	353.253	348.659	326.597	259.877	376.218	286.559	366.039
BSND_CTTGAAAGTCAGAGTCAGCA	BSND	96.0703	117.195	161.609	123.939	131.804	127.408	135.441	148.514	140.124	150.682	113.276	117.627	159.774	147.139	133.389	145.547	99.5682	123.365	112.099	115.401	82.7147	93.4704	124.987	113.993	140.727	83.9419	93.4532	146.307	107.028	92.4833
ARL14EPL_GGATTAAAGTCTGCTACCTG	ARL14EPL	381.455	407.579	368.237	367.819	401.06	365.236	393.301	304.645	366.76	406.971	316.638	312.319	384.735	405.012	340.79	345.138	343.623	297.528	396.303	400.009	436.734	359.575	368.265	508.584	413.566	397.842	391.735	399.11	290.011	309.576
PRADC1_CGGGTGGTCCAGGAGCACGG	PRADC1	353.199	372.42	422.491	525.075	436.835	511.331	390.696	335.109	318.021	374.773	415.643	425.89	337.442	427.765	313.611	357.445	346.617	332.602	256.509	370.274	190.795	223.184	358.891	278.093	329.13	350.581	421.179	264.746	397.039	280.37
NEFH_TTTATGTGAGTGGACACAGA	NEFH	456.334	367.212	369.391	389.142	416.123	385.622	406.324	569.939	556.842	435.304	428.13	392.089	495.937	477.823	352.916	479.448	312.929	430.569	451.693	669.041	516.14	526.486	500.841	489.794	429.075	430.996	407.097	417.025	435.017	551.979
SHF_CCTGCGCATTATCAGACTCA	SHF	213.332	156.26	174.306	146.595	188.291	205.552	161.488	166.285	219.325	212.5	196.226	156.836	169.999	156.24	229.563	201.197	253.038	192.305	155.62	114.693	126.278	187.895	182.124	166.605	125.219	140.373	345.649	253.798	161.117	208.331
ADGB_AAAAGCGACAAAGTTCCAAA	ADGB	237.35	250.017	283.969	213.228	291.851	309.177	238.325	331.301	371.634	309.092	308.611	312.319	363.006	307.93	270.96	329.62	335.388	274.548	439.824	426.912	523.308	493.104	320.056	259.303	389.442	349.875	282.92	350.341	242.827	399.138
GFI1B_GAAGCTAGGCTTGTAGAATG	GFI1B	149.757	88.5475	175.461	139.931	201.471	219.142	256.557	208.174	192.519	171.288	112.384	143.315	175.112	125.902	160.987	98.458	129.514	134.25	238.046	139.472	263.033	146.882	208.461	119.004	195.87	103.693	79.3712	50.7596	126.592	90.5363
ATXN7L3_GCAGCCGAATCGCCAACCGC	ATXN7L3	67.8143	151.052	139.676	245.213	80.9651	139.299	108.093	178.979	82.8562	114.621	125.763	91.9382	83.0823	77.3618	139.661	87.221	145.983	124.575	90.3387	21.9474	42.4602	105.87	98.2041	67.6442	69.5021	70.5394	126.738	234.888	148.458	170.364
NIPSNAP3A_CTGAGGCGCCAGCGTCCGTG	NIPSNAP3A	483.177	428.414	443.269	487.76	412.357	419.597	427.161	540.744	409.407	399.243	482.539	409.666	375.788	511.194	467.071	404.534	458.912	435.407	518.953	416.292	542.057	639.986	495.484	524.869	504.321	529.751	588.883	521.53	380.928	399.138
COX6A2_TTCAACTCCTATCTCCACTC	COX6A2	341.897	320.334	320.909	310.514	278.671	278.599	386.789	328.762	316.803	191.894	396.912	246.07	373.231	201.747	301.484	232.233	313.677	257.616	225.517	252.749	376.628	277.55	269.169	245.523	343.49	313.9	318.765	207.02	334.894	270.635
KCNC2_CACTCCTTCTACATACGTCA	KCNC2	723.353	843.806	644.126	654.345	719.271	788.231	799.624	902.51	834.654	811.365	856.261	965.351	825.71	817.608	720.886	786.059	699.972	799.455	790.628	967.101	714.655	955.687	674.484	695.232	743.845	592.531	762.988	920.64	702.011	791.462
HTRA3_ATGAAGTTGAACTTGTAGCG	HTRA3	428.078	572.955	450.195	539.734	463.196	455.271	462.324	505.202	588.522	484.243	555.677	473.211	538.118	512.711	474.597	534.028	527.038	527.326	547.967	595.411	472.025	529.348	499.948	423.402	495.705	469.087	538.956	499.634	1008.13	613.31
ZBTB11_CAGGACTTACGAGTACAGAA	ZBTB11	412.537	442.738	365.928	273.199	504.62	402.609	432.37	332.57	402.096	190.606	242.607	254.182	262.029	163.825	250.888	204.407	226.836	231.007	150.345	50.9746	62.8632	64.857	216.049	219.217	292.369	182.697	97.2937	92.5617	412	217.092
ARL4A_GTAAATACCGTACCTACCAA	ARL4A	250.065	298.197	148.911	226.555	222.183	229.334	182.325	227.214	232.728	218.94	248.851	212.269	148.27	151.69	154.296	219.39	132.508	193.514	182.656	130.268	163.224	136.39	178.553	152.826	178.638	175.643	181.786	112.467	188.738	171.337
ACAP1_TGCCGGAACACTGAATGCAG	ACAP1	490.241	467.479	467.511	513.081	408.591	490.946	407.626	379.536	471.549	352.879	346.964	489.436	415.412	400.461	512.649	426.473	406.508	405.17	319.812	415.584	295.567	356.714	415.136	414.634	385.421	408.423	432.701	439.917	519.028	420.556
VAMP2_CACACTCACCTCATCCACCT	VAMP2	367.327	425.809	420.182	401.136	353.987	419.597	360.743	368.112	350.92	324.546	383.533	420.482	334.886	524.846	413.548	403.464	356.349	484.995	367.289	559.304	319.279	473.075	455.31	357.011	395.76	414.066	371.252	378.209	401.643	338.781
HSPA12A_GGATGTGGTCCCAAAGTCGA	HSPA12A	316.467	342.471	335.915	350.494	397.294	370.333	295.627	340.186	305.837	276.894	304.151	242.014	403.908	374.674	428.183	330.155	387.792	366.467	201.778	228.678	175.355	318.562	379.871	408.37	380.826	471.203	354.61	265.742	336.045	420.556
GNAQ_TTGCAGAATGGTCGATGTAG	GNAQ	589.137	569.048	593.334	653.012	497.088	473.958	540.463	473.468	439.869	573.107	583.328	539.461	591.802	511.194	524.357	483.193	576.448	465.643	323.109	530.985	409.714	410.125	574.494	567.459	607.139	586.182	368.692	469.775	553.553	567.555
B3GNT7_ACTGCGTTGGAACACCGTCA	B3GNT7	1092.09	1010.48	1115.1	1060.81	1167.4	1026.06	1014.51	924.088	863.897	968.487	1065.87	1099.2	1081.35	1096.72	1159.1	1011.34	1051.83	955.475	1076.15	1122.15	1119.96	1023.41	979.809	1162.48	1026.45	1207.63	1001.1	917.654	1035.75	1090.33
ARAP2_AGCTCAAAGAAAATGGACAG	ARAP2	324.944	274.758	249.339	209.23	233.481	263.31	295.627	298.298	291.215	350.304	300.583	269.054	300.374	251.805	340.372	352.094	348.114	351.954	313.218	310.803	264.136	302.348	321.842	314.42	283.753	320.249	446.783	428.969	276.201	237.536
FAM110C_TGGCGCGCAGGGCTATTGCG	FAM110C	186.489	182.304	182.387	134.6	120.506	161.384	195.348	194.211	138.906	198.334	230.12	178.468	204.51	115.284	157.223	180.863	131.759	152.392	166.17	241.421	265.239	140.206	138.379	121.509	108.561	191.867	149.781	181.142	179.531	164.523
DAPL1_AGGATGTCCCCCTTTCCGAG	DAPL1	552.404	475.292	457.121	587.711	514.034	506.235	441.486	422.694	509.322	400.531	511.972	584.078	351.502	529.397	414.802	479.448	493.349	446.292	653.472	816.301	681.018	791.637	558.424	499.815	594.502	543.153	427.58	414.039	591.531	530.562
BAX_AGTAGAAAAGGGCGACAACC	BAX	500.13	420.601	450.195	439.784	363.401	375.429	450.603	415.078	678.689	774.017	661.818	669.256	642.929	550.634	551.955	586.467	624.36	678.509	763.592	809.929	784.136	808.805	585.654	514.847	483.069	541.743	796.272	832.06	797.531	646.409
OR51A4_GTATCTCAGAGGGTTGTGGA	OR51A4	413.95	381.536	375.163	325.173	402.943	343.152	349.022	519.165	383.819	468.789	520	439.41	426.915	432.316	388.041	514.764	457.415	505.555	536.097	554.348	548.123	531.255	464.238	388.328	427.352	421.12	518.473	555.37	422.358	452.681
HIST1H3I_CAAACAGCTCGCAAGTCCAC	HIST1H3I	221.809	178.397	169.689	222.557	176.993	195.359	256.557	189.133	221.762	220.228	171.252	179.82	235.187	232.085	230.399	206.548	207.371	188.676	164.852	150.092	165.429	121.13	253.545	174.121	192.998	177.054	194.587	222.944	225.564	303.735
ST7L_TGGTGGTACTTCCATAAGCA	ST7L	286.798	251.319	331.298	237.217	310.68	285.394	257.859	312.261	357.013	333.561	310.394	217.677	411.577	298.829	306.084	271.295	303.945	341.068	268.378	179.827	257.518	209.832	296.844	310.662	244.693	247.593	427.58	368.256	319.933	302.761
PSMD14_AAACACATCAATCACTCTGA	PSMD14	512.846	554.724	577.174	423.791	668.433	601.366	511.812	571.209	405.751	403.107	252.418	355.584	276.089	216.916	285.177	280.926	306.94	262.453	162.214	104.781	98.1548	72.4873	369.158	290.619	366.466	274.398	78.091	82.6088	127.743	185.94
HCN3_CAACTTCCGAACGGGCATCG	HCN3	330.595	299.499	300.13	409.132	310.68	278.599	341.208	318.607	367.979	347.728	370.154	325.84	251.803	282.143	287.685	368.147	224.59	318.089	206.394	208.146	241.527	206.97	345.946	325.694	345.213	352.697	323.886	326.454	375.173	365.066
CEACAM18_GGGAAACTACACTGTTCGGG	CEACAM18	560.881	466.177	469.819	531.738	476.376	448.476	425.859	417.617	417.936	463.637	380.858	393.441	465.261	512.711	463.725	479.448	474.633	514.022	456.969	540.897	495.737	585.621	410.225	445.95	417.013	510	422.46	367.261	544.347	358.251
MRPL30_GAAGATCATGAAAAATACGG	MRPL30	281.147	210.951	237.796	166.585	310.68	332.96	209.674	252.601	264.409	257.576	233.688	212.269	300.374	192.646	179.803	146.082	183.415	183.838	174.743	169.207	179.215	170.727	198.64	101.466	273.413	144.606	197.148	187.114	287.71	181.073
SLN_GAAAATGGGGATAAACACCC	SLN	156.821	196.628	169.689	131.935	231.598	159.685	220.092	242.446	264.409	218.94	153.413	174.412	187.894	215.399	168.513	227.417	226.087	284.224	189.25	328.503	271.304	210.785	181.678	172.868	190.7	162.241	362.291	250.812	177.229	174.258
CD36_TGCGACATGATTAATGGTAC	CD36	360.263	403.673	357.848	458.441	325.743	382.224	324.278	283.066	458.146	370.91	312.178	342.064	299.096	351.92	404.767	395.437	397.524	402.751	435.208	619.483	533.786	494.058	398.173	385.822	343.49	360.456	322.606	369.251	377.475	374.801
TBC1D10B_ACCATCTACCGGCCTGACGA	TBC1D10B	690.858	777.395	791.882	680.998	743.749	772.942	754.043	775.574	706.714	539.622	774.202	636.807	737.515	593.107	700.815	565.599	723.18	656.738	600.719	390.805	598.303	523.625	774.92	652.641	734.08	543.153	551.758	709.639	752.648	781.727
KLHL41_TGTGGTAGGAGGACTATATG	KLHL41	199.205	108.08	117.743	213.228	212.769	164.781	199.255	224.675	136.469	127.5	181.063	178.468	92.0296	112.25	143.006	151.968	120.53	135.46	73.8535	115.401	103.118	114.454	194.623	179.132	168.873	186.929	121.617	177.161	194.492	218.066
MAP2K5_TATCGGGACACTCTTGGTCA	MAP2K5	395.583	335.96	370.545	294.522	393.528	353.345	444.091	383.344	297.307	310.379	470.943	415.074	389.848	444.451	487.978	372.428	419.983	440.244	534.778	485.674	636.903	612.327	403.976	501.068	365.317	414.772	487.749	367.261	476.447	369.933
FBXO39_GATCTCAGAGCTCAACATCG	FBXO39	779.864	597.696	702.997	810.268	670.316	711.786	660.276	623.252	653.101	583.41	610.978	608.414	651.877	606.759	643.111	620.714	695.48	618.035	576.981	402.841	662.821	463.537	661.985	645.125	601.969	531.867	732.263	635.988	614.548	614.284
ATOH7_CAGAGCCATGATGTAGCTCA	ATOH7	216.158	242.204	156.991	289.191	280.553	305.779	210.976	182.787	235.165	202.197	145.386	148.723	187.894	259.389	238.762	268.084	195.393	169.325	245.299	160.004	260.276	246.075	216.495	145.31	243.545	134.025	194.587	240.859	135.799	268.688
DYNLT3_CCAGTGGACTGCAAGCATAG	DYNLT3	666.841	483.105	656.824	771.62	653.369	621.751	636.834	774.305	595.833	650.38	747.444	845.02	715.786	640.131	675.726	725.593	696.229	663.995	612.588	603.199	560.254	513.133	624.489	740.328	695.021	713.153	796.272	705.658	677.844	664.906
TPCN1_TTCAAACACTACCACCATCA	TPCN1	409.711	515.659	520.611	381.146	504.62	456.97	474.044	436.657	465.457	580.834	402.264	501.604	417.968	403.495	448.672	506.738	528.535	559.981	564.452	680.369	655.652	679.091	511.108	522.363	491.11	513.527	425.02	502.62	493.71	451.708
C20orf194_CTGGGCACTTATCTAACAGG	C20orf194	395.583	363.305	413.256	406.467	395.411	395.814	402.417	382.075	338.735	385.077	452.213	336.656	393.682	438.383	324.064	435.57	357.098	351.954	480.048	514.702	445.005	443.508	366.926	382.064	399.207	478.257	449.343	265.742	247.43	347.542
TTC29_CCTGTACCATTACCTGACCA	TTC29	269.844	299.499	285.124	317.177	327.626	295.587	306.045	316.069	232.728	239.546	29.434	44.617	31.9547	42.4731	15.8896	17.1231	14.224	20.5609	8.57228	7.0798	9.37433	14.3067	10.7132	8.76869	13.2112	18.3402	43.5261	31.8492	231.319	217.092
EFCAB11_CAGAGCCAGGTCGCGGACGT	EFCAB11	357.438	377.629	376.317	470.435	461.313	400.911	445.393	444.273	350.92	309.092	407.616	440.762	393.682	532.431	479.197	431.824	444.688	380.981	381.137	340.538	266.341	341.453	434.776	407.118	361.296	362.573	304.683	354.322	376.324	433.211
REL_TTCCTTCTCCAATTGAACCG	REL	323.531	223.973	290.895	273.199	274.905	263.31	335.999	324.954	222.981	274.319	218.525	216.325	341.277	271.525	361.697	256.312	279.989	307.204	326.406	288.856	226.638	286.134	254.438	206.691	272.265	244.772	234.273	236.878	375.173	297.894
CD274_GGTTCCCAAGGACCTATATG	CD274	307.99	248.714	220.48	186.575	286.202	341.454	256.557	298.298	298.526	229.243	347.856	286.631	253.081	244.22	340.79	279.321	330.147	276.967	362.673	381.601	329.205	405.356	284.346	284.356	257.33	287.095	345.649	342.379	208.302	309.576
PRR34_CCCCCCCCAACCCCGCAACG	PRR34	307.99	273.456	271.272	259.872	293.734	266.708	223.999	261.487	315.584	350.304	367.479	382.625	323.382	324.616	371.315	415.236	416.989	391.866	453.672	564.968	452.725	378.651	384.335	336.968	381.975	366.1	458.305	321.478	347.553	328.072
GINS1_TCGGATCAGAGCACTCAGAT	GINS1	216.158	194.023	228.561	142.597	246.661	242.925	210.976	170.093	213.233	149.394	128.439	156.836	155.939	121.352	86.1384	80.7998	101.814	71.3583	69.8971	65.1342	44.6659	61.0419	82.5807	80.1709	150.492	79.0041	26.8838	6.96701	111.631	116.821
RGMA_GCACTTGAGGATCTTGCACG	RGMA	471.875	432.32	457.121	589.044	457.547	431.489	454.51	583.902	504.448	443.031	440.617	446.17	415.412	476.306	408.948	419.517	436.453	439.035	439.165	348.326	476.988	505.503	425.402	439.687	399.207	456.39	416.059	344.369	393.587	371.88
RAX_CGGCAAGGTCAACCTACCAG	RAX	623.044	395.859	517.148	398.471	566.756	594.571	687.625	522.973	545.876	677.426	544.974	555.685	531.727	585.522	658.164	599.845	610.136	596.265	491.258	652.05	576.246	660.969	523.607	554.933	490.536	507.178	604.245	697.696	574.268	443.92
MAP3K2_TCTACATTATACCAATAACG	MAP3K2	90.4191	117.195	101.583	85.2914	94.1454	159.685	117.209	99.0095	125.503	184.167	88.3019	89.2341	95.8642	95.5645	118.336	122.002	158.71	137.879	128.584	179.827	109.183	109.685	236.583	165.352	184.956	145.311	140.82	248.822	166.872	123.636
LSM14B_AGTCGGCAAGAGCCCCATGG	LSM14B	526.974	464.874	556.395	617.03	559.224	433.187	444.091	427.772	520.288	551.213	570.84	594.894	435.863	415.63	513.485	512.089	574.95	614.407	451.693	463.727	483.605	647.616	551.729	519.858	500.875	565.726	619.607	483.709	509.821	477.019
ZNF451_TCCTATAATGCACTGTAACA	ZNF451	207.681	273.456	313.982	287.858	323.86	290.49	304.743	269.103	325.332	292.349	290.772	346.12	316.991	341.302	234.581	299.12	257.53	337.44	210.351	176.995	217.815	215.554	279.435	268.071	226.313	323.07	355.89	382.19	280.805	272.582
RRNAD1_GGGACACACTCCCTTGCTCA	RRNAD1	292.449	368.514	375.163	353.16	320.095	343.152	337.301	309.722	298.526	262.728	300.583	312.319	195.563	259.389	262.597	245.075	241.06	280.595	226.836	288.148	283.436	340.499	294.166	314.42	277.434	259.585	280.36	389.157	243.978	274.529
INSL6_GTAGGCTTCGACCTTCTCCG	INSL6	170.949	162.771	178.924	249.211	167.579	205.552	122.418	125.666	157.183	92.7275	203.362	212.269	122.706	162.308	204.892	173.907	176.677	192.305	95.6139	75.0459	65.6203	66.7646	145.521	155.331	154.513	207.386	189.467	151.284	224.413	300.814
MAP3K5_ACTTATGGGATAGTCTACGC	MAP3K5	316.467	302.103	250.493	330.504	303.148	290.49	330.789	317.338	272.938	287.198	393.345	328.544	398.795	307.93	288.522	346.744	263.519	308.413	310.58	196.818	262.481	324.285	285.685	278.093	236.078	253.942	273.959	286.643	237.073	261.874
EFNA1_CGGACTTGGTCCTTGGACTG	EFNA1	211.92	312.521	187.004	331.837	201.471	185.166	252.65	161.208	235.165	189.319	234.58	185.228	145.714	175.96	203.638	176.047	199.136	199.561	319.153	426.912	389.862	395.819	136.147	151.573	172.319	242.656	186.906	260.765	224.413	171.337
PLEKHD1_AGCCATGATCAAAAGCCTGG	PLEKHD1	149.757	154.958	227.406	185.242	171.345	113.818	151.069	234.83	137.687	162.273	159.657	155.484	169.999	221.467	195.275	164.275	161.705	169.325	211.01	186.199	269.65	210.785	177.214	167.858	178.638	184.108	305.963	231.902	109.33	256.033
SNX19_GATAGCGACGATTCACAGTG	SNX19	237.35	192.721	154.683	163.919	139.335	149.492	145.86	167.555	158.401	130.076	203.362	205.509	177.668	159.274	175.622	223.671	190.901	210.446	115.396	131.684	142.821	160.235	166.054	157.836	201.614	131.909	197.148	181.142	159.967	149.92
SH3YL1_TTCACGTACTGCAAGTCAAG	SH3YL1	329.182	415.392	408.639	502.419	267.373	305.779	376.37	331.301	315.584	342.576	316.638	373.161	304.209	310.964	526.029	368.147	732.912	476.528	437.186	772.406	350.159	548.423	339.251	430.918	356.701	362.573	288.041	411.053	443.073	427.37
GRAMD4_GGTTAACTGAAAATATGAGA	GRAMD4	66.4015	126.31	96.9652	45.311	86.6138	100.228	82.0462	92.6627	116.973	113.334	115.06	71.6577	108.646	109.217	114.154	90.9667	118.284	88.2908	184.634	104.781	110.838	119.222	76.3314	145.31	98.7964	86.0581	101.134	50.7596	107.028	159.655
MTRNR2L5_GAGACAGCTAAACCCTGGTG	MTRNR2L5	178.013	154.958	196.239	247.878	220.3	174.974	212.278	153.592	254.661	284.622	179.28	159.54	277.367	244.22	227.89	175.512	233.574	197.142	278.929	419.832	299.979	211.739	175.875	207.943	228.61	162.241	149.781	180.147	204.849	210.278
LSM14A_AGAAGTCGATGAGCCTAGTG	LSM14A	399.822	421.903	402.867	438.451	427.42	361.839	352.929	355.419	404.533	430.152	363.911	371.809	389.848	324.616	389.713	398.648	411.748	412.427	465.541	406.381	424.051	468.306	391.477	345.737	399.781	379.502	407.097	456.837	378.626	432.238
PI3_GGTCCAGTCTCCACTAAGCC	PI3	337.659	300.801	340.532	302.518	348.338	295.587	386.789	387.152	308.274	321.97	379.074	398.849	384.735	338.268	430.274	412.561	411	435.407	432.571	379.477	402.545	371.02	356.66	374.548	272.839	396.431	535.116	454.846	392.436	333.913
UNG_TCCAACTGCTCGGCACTCAG	UNG	121.501	201.836	207.782	161.254	154.399	169.877	165.395	177.709	158.401	181.591	169.468	136.555	189.172	178.994	177.294	202.802	196.142	175.372	187.931	213.102	313.765	220.323	157.127	194.164	154.513	141.784	264.997	300.577	237.073	164.523
AZIN1_TGCTCGATGTGTGTTTGACA	AZIN1	173.774	126.31	146.602	145.262	150.633	171.576	156.278	194.211	155.965	150.682	124.871	129.795	117.593	98.5983	132.971	134.845	119.781	128.203	139.135	167.791	133.446	190.756	143.735	157.836	110.284	118.506	89.6126	109.482	142.704	120.715
C2orf50_GGTACCGATTGCCCCCCACC	C2orf50	218.984	263.038	213.554	238.549	265.49	244.623	199.255	187.864	265.627	262.728	274.717	305.559	226.24	289.727	288.94	348.349	263.519	326.555	439.824	408.505	453.277	433.016	242.386	232.997	291.22	254.647	398.136	439.917	317.631	229.748
PRTFDC1_AGTCTCCATAATAGTGCTGT	PRTFDC1	401.235	276.06	398.25	319.843	340.807	276.9	326.882	303.375	386.256	401.819	393.345	369.105	377.066	461.137	373.824	372.428	370.573	368.886	543.351	567.8	575.694	582.759	305.326	455.972	350.957	366.805	389.175	386.171	340.648	487.728
RPS2_ACAGCCGGGTACCTTGAACC	RPS2	67.8143	61.202	73.8782	26.6536	141.218	151.191	108.093	90.124	62.1421	15.4546	44.5969	40.561	37.0675	45.5069	27.1796	24.0794	20.2131	22.9798	22.4198	27.6112	18.1972	20.9832	28.1221	22.5481	62.035	24.6888	1.28018	29.8586	10.3575	8.76157
DPP7_TGGGAACGAGGGCGACGTGT	DPP7	115.849	136.728	86.576	114.61	163.813	120.613	113.302	153.592	113.318	176.44	123.979	95.9943	138.044	166.859	158.06	155.714	79.3551	157.23	188.59	148.676	194.104	144.975	154.448	110.235	132.112	114.979	76.8108	96.5428	95.5196	129.477
HSD17B13_TGAGGTAAGGAATCCCTTCG	HSD17B13	307.99	300.801	345.15	311.847	303.148	248.021	286.51	346.533	289.997	278.182	267.581	275.814	255.638	270.008	369.642	315.173	316.672	365.258	330.363	412.044	336.925	383.419	333.894	275.587	322.237	318.133	307.243	314.511	298.067	245.324
SLFN14_TGAAAGACAATTCTGTCACA	SLFN14	176.6	222.671	193.93	166.585	192.057	180.07	190.139	205.635	248.568	226.667	193.551	183.876	184.059	133.487	235.835	217.785	171.437	241.893	173.424	100.533	127.932	133.529	161.144	162.847	195.87	131.909	181.786	144.317	265.844	150.894
SOX7_ACTACAAGTACCGGCCGCGC	SOX7	292.449	299.499	274.735	354.492	233.481	346.55	304.743	308.453	246.132	319.395	346.964	366.401	328.495	336.751	383.023	341.928	340.628	355.582	229.473	341.246	179.767	396.772	310.236	324.442	295.24	436.639	357.17	402.096	323.386	345.595
BAALC_GTCCAGCTCTCGTAGTAGCG	BAALC	183.664	246.11	192.776	235.884	182.642	225.937	208.371	309.722	207.14	215.076	167.684	212.269	380.9	298.829	178.549	212.969	207.371	137.879	201.119	249.209	186.935	194.571	231.672	184.142	158.534	247.593	309.804	246.831	222.112	212.225
OR2K2_TCGATGAGATTCCCACAGAG	OR2K2	199.205	160.167	240.104	271.866	176.993	188.564	184.929	234.83	218.107	176.44	209.605	213.621	194.285	145.622	151.788	154.643	175.929	147.554	201.778	126.02	170.392	168.819	241.046	269.324	194.721	271.577	183.066	172.185	215.207	237.536
ZC3H11A_AAGGAAAAATCTAAGAAGCA	ZC3H11A	255.716	200.534	203.165	87.9567	242.895	263.31	184.929	220.867	220.544	247.273	296.123	205.509	233.909	298.829	308.175	296.979	363.836	289.062	269.038	372.398	417.985	228.907	238.815	179.132	237.801	216.556	244.515	374.228	268.145	350.463
NUP155_ACTGCTCAACAAGTTCAGGT	NUP155	288.211	407.579	404.022	449.112	491.439	356.743	355.533	375.728	222.981	168.712	247.959	310.967	228.796	215.399	242.107	295.374	241.06	268.501	202.438	193.987	145.578	182.172	159.805	217.965	230.908	175.643	135.699	147.302	212.905	209.304
KRTAP5-10_GGAGCCACAACCCCCACAGC	KRTAP5-10	259.955	259.132	318.6	283.86	261.724	292.189	300.836	244.985	308.274	312.955	177.496	189.284	221.127	124.386	212.001	239.189	214.109	204.399	214.966	108.321	135.101	135.437	136.147	135.288	195.87	179.17	209.95	169.199	165.721	215.145
TCEA2_GGCCTCTGAGGCATCCCTCG	TCEA2	604.678	567.746	622.193	732.973	625.126	550.403	632.927	516.626	487.389	701.895	562.813	693.592	683.831	629.512	693.707	676.364	637.835	642.225	674.573	630.102	616.5	766.839	580.744	568.712	507.193	533.278	728.423	718.597	645.62	624.992
LOC401052_TTTCAAGTGTCTACCTGGGC	LOC401052	382.868	358.097	328.989	385.144	350.221	392.417	281.301	351.611	294.87	345.152	277.393	359.64	370.675	424.731	330.336	336.577	312.18	305.994	334.978	528.861	336.373	359.575	331.216	418.392	342.916	436.639	485.188	387.167	302.671	334.887
YBX1_GGCGGGGACAAGAAGGTCAT	YBX1	360.263	368.514	361.311	330.504	312.563	390.718	356.836	338.917	313.148	324.546	277.393	289.335	301.653	238.153	220.364	239.189	217.104	214.075	274.972	250.625	339.682	279.457	305.326	318.178	233.78	344.232	239.394	96.5428	215.207	161.602
SLCO4C1_CACCAAGCTCCCAACCATCG	SLCO4C1	203.443	111.987	218.172	218.559	173.228	244.623	225.301	176.44	168.149	144.243	177.496	146.019	163.608	268.491	143.006	196.916	155.716	122.156	118.034	113.985	113.595	143.067	218.727	240.513	190.7	179.875	161.303	201.048	179.531	178.152
CDC25C_TGCTAAGATTCGAAAGATCG	CDC25C	346.136	414.09	369.391	487.76	399.177	383.923	408.928	487.431	533.691	543.486	516.432	400.201	403.908	452.035	468.743	395.437	502.333	463.224	500.489	451.691	591.686	478.797	482.986	698.99	583.588	533.983	663.134	423.992	378.626	466.31
DHX35_ATCTCAGGAACCGTAGACTG	DHX35	286.798	229.182	258.574	313.179	303.148	254.816	272.185	192.942	280.249	296.213	304.151	251.478	231.352	236.636	168.932	248.285	268.011	253.987	226.836	234.341	158.261	158.327	239.707	318.178	267.669	328.008	177.945	182.137	322.235	321.258
ANXA5_AATCTCCACGCAATACCTGA	ANXA5	380.043	319.032	374.008	373.15	346.455	404.308	389.394	382.075	426.466	343.864	361.235	397.497	379.622	477.823	487.978	431.824	410.251	359.21	464.881	572.756	606.023	483.566	404.869	354.506	357.275	410.539	354.61	546.412	417.754	499.41
DMRTA2_TGAACCGAAGACCTCGTAGG	DMRTA2	128.565	166.678	167.38	151.925	176.993	152.89	154.976	128.205	164.494	181.591	126.655	151.428	135.488	130.453	146.77	148.757	144.486	194.723	170.127	81.4177	164.327	117.315	144.628	129.025	149.343	192.573	180.505	206.024	112.782	174.258
ZNF679_GAGATGGTAACCAAACACCC	ZNF679	392.758	356.794	374.008	313.179	480.142	479.054	360.743	393.499	406.97	260.152	236.364	262.294	282.48	329.167	281.413	246.68	233.574	320.508	173.424	96.2853	113.043	70.5797	317.824	410.876	292.369	330.83	218.911	304.558	158.816	236.562
RAB13_GCCAGCGGGCTCACCGATGG	RAB13	194.966	167.98	222.789	157.256	199.588	237.828	233.115	192.942	163.275	184.167	209.605	193.341	273.533	218.433	166.423	168.021	185.661	204.399	234.089	332.751	269.65	272.781	235.244	212.954	234.929	191.162	197.148	103.51	235.922	189.834
BZRAP1_TTGAGGACCACCAGACGGCG	BZRAP1	104.547	177.095	163.917	126.604	120.506	100.228	154.976	149.784	180.334	226.667	158.765	125.739	86.9169	133.487	178.131	132.169	93.5791	160.859	153.642	99.1172	114.698	100.147	134.361	130.278	122.921	144.606	142.1	146.307	204.849	140.185
KIF23_AGAACCATTGGTTACTGACG	KIF23	295.275	244.808	220.48	257.207	318.212	351.646	274.79	295.759	114.536	190.606	221.201	216.325	134.21	195.68	196.947	136.985	160.956	137.879	123.968	135.224	108.632	109.685	132.129	157.836	140.727	201.037	62.7289	39.8115	148.458	111.953
BNC1_TGCATTGGTCACACTGACGG	BNC1	380.043	359.399	287.432	402.469	387.879	375.429	419.347	407.462	315.584	378.637	418.319	396.145	278.645	335.234	257.997	346.744	318.918	321.717	399.6	530.277	338.027	495.965	315.592	261.808	337.746	256.763	350.769	403.091	421.207	258.953
SLC1A4_AGCAAATGCTGTCGCAAATG	SLC1A4	675.317	717.495	608.341	609.034	551.692	530.017	511.812	591.518	629.95	629.774	636.844	592.19	627.591	667.435	698.306	610.012	707.458	645.853	818.323	801.434	1127.13	1057.74	598.152	593.766	581.291	503.651	718.181	621.059	691.654	645.436
USP40_TCGAGCTAATCCAAGATATG	USP40	358.851	274.758	265.5	243.88	291.851	249.72	209.674	271.641	221.762	323.258	392.453	300.151	287.593	317.032	241.271	213.504	246.3	297.528	306.624	350.45	301.082	366.251	251.76	370.79	322.812	337.178	318.765	257.779	248.581	296.92
GPRC5C_CACCACCCATATGGCAACGG	GPRC5C	469.049	348.981	507.913	566.388	495.205	445.079	573.021	497.586	471.549	480.38	412.075	471.859	397.517	485.407	380.096	459.649	416.989	368.886	408.172	344.078	467.614	363.39	453.078	519.858	429.075	442.282	317.485	405.082	386.682	424.45
TBCCD1_TTGGATCTAAAAGCAGCTCG	TBCCD1	423.839	449.248	453.658	457.108	468.844	453.573	475.347	526.781	452.053	479.092	482.539	412.37	476.765	432.316	439.891	527.607	412.497	460.805	592.147	543.729	475.334	509.318	424.51	491.047	583.588	554.44	464.706	484.705	463.788	516.933
HMGCL_CACACCAATGGTGTCCCCCA	HMGCL	834.964	849.014	781.493	802.272	901.913	832.399	959.81	726.07	636.043	779.168	945.454	744.97	892.176	715.975	804.934	668.337	885.633	688.184	862.503	749.043	823.839	917.536	860.179	657.652	857.002	705.394	631.129	699.687	657.129	720.396
ARHGEF40_CACGGGGCTACCGACGACGG	ARHGEF40	466.223	380.233	364.774	513.081	423.655	451.874	445.393	420.156	348.483	405.683	345.18	386.681	311.878	288.21	292.703	325.34	303.196	331.393	451.693	520.365	388.759	399.634	412.904	440.94	362.445	451.452	455.744	363.28	355.609	306.655
Non-Targeting_GCCCCTTATGATTGTTATAG	Non-Targeting	387.107	505.242	425.954	150.593	438.718	470.56	326.882	439.196	452.053	549.925	483.43	538.109	425.637	394.393	572.862	513.159	570.458	618.035	538.735	569.924	489.12	485.474	397.727	360.769	479.048	438.755	570.961	542.431	569.665	687.297
SLC9A9_TATATCCATTTACAGTCCCA	SLC9A9	289.624	291.686	289.741	213.228	265.49	236.13	253.952	330.032	344.828	360.607	276.501	237.958	278.645	270.008	312.356	316.778	381.054	365.258	386.412	343.37	352.365	367.205	252.652	359.516	287.773	290.622	307.243	259.77	260.089	285.238
PRR16_ACGCTGAATAGTAGCTCAAG	PRR16	240.176	240.901	288.587	221.224	203.354	178.371	161.488	170.093	260.753	255.001	268.473	255.534	286.314	259.389	288.522	217.25	257.53	330.183	268.378	308.679	298.876	341.453	247.296	276.84	152.79	225.726	257.316	302.567	177.229	215.145
OR1A1_ATAGCTGTCTGTGTTACCCA	OR1A1	405.473	404.975	442.115	494.423	442.484	470.56	468.835	529.32	403.315	462.349	470.051	419.13	388.57	462.654	499.268	454.833	455.169	443.873	605.994	708.688	661.166	788.776	404.869	418.392	344.064	402.78	512.072	426.978	430.414	400.112
FAM131A_GAGTGGATCGAACTTCCTCG	FAM131A	252.891	292.988	256.265	257.207	197.705	242.925	240.929	251.332	210.796	225.379	317.53	275.814	263.307	209.332	303.157	321.594	285.229	296.318	294.095	266.909	306.044	219.369	308.004	281.851	269.967	286.39	302.123	329.44	200.246	192.755
DPY30_GATGCTGGAGGGACAAACGC	DPY30	234.524	194.023	236.641	211.896	257.959	256.515	209.674	180.248	221.762	139.091	133.791	118.979	129.097	86.4631	163.496	156.249	108.552	182.629	139.135	113.985	158.261	109.685	188.373	164.1	179.212	117.095	56.3279	115.453	165.721	153.814
GPR162_ACTCTCGTTCCAGTCATAGT	GPR162	350.374	381.536	379.78	477.099	320.095	237.828	264.371	267.833	297.307	310.379	389.777	436.706	369.397	342.819	398.494	349.419	395.278	435.407	306.624	203.898	178.664	218.416	258.902	398.349	305.58	348.465	471.106	414.039	288.86	312.496
AEN_CGGGTACGGTAGTCAGCGAT	AEN	368.74	321.636	404.022	377.148	433.069	416.2	471.44	404.923	442.306	499.698	589.571	567.853	476.765	496.025	542.337	515.299	545.754	501.927	432.571	456.647	406.405	522.671	316.039	365.78	407.822	368.216	395.576	498.639	399.341	437.105
HOXA7_CTCACAGAGAAGCGGCTACG	HOXA7	235.937	377.629	311.674	410.465	271.139	278.599	235.72	274.18	230.291	287.198	317.53	281.223	328.495	323.099	349.153	323.199	330.147	314.46	410.81	480.011	493.531	527.44	316.932	249.281	301.559	333.651	284.2	275.694	322.235	297.894
TBX2_CTTATAGCGGCAATCGTCAG	TBX2	142.693	139.332	146.602	141.264	169.462	132.504	161.488	189.133	138.906	186.743	140.034	124.387	115.037	110.733	184.821	186.749	178.175	179	119.353	76.4619	99.8091	86.7939	141.503	117.751	121.772	136.141	162.583	150.288	162.268	109.033
KIR2DS4_ATTTCACCAGGTGACCTGGG	KIR2DS4	340.484	363.305	333.606	385.144	363.401	407.706	438.882	333.84	409.407	432.728	293.448	306.911	411.577	444.451	357.934	329.62	366.83	360.42	272.335	449.567	331.41	412.987	318.717	210.449	334.3	296.266	350.769	315.506	339.497	391.35
Non-Targeting_TGCAACCTTCCTTTTCAGGA	Non-Targeting	891.476	964.908	943.102	1078.14	980.996	908.844	819.159	971.055	921.166	1029.02	1099.76	953.182	972.702	1072.45	987.664	970.133	917.824	999.016	1059.01	1083.21	1192.75	1063.46	784.74	915.702	785.776	761.12	1044.63	1038.08	855.073	1084.49
RAB3B_GTAGTCAAAATTCTGGTCAG	RAB3B	286.798	278.664	289.741	243.88	224.066	259.912	240.929	262.756	305.837	222.803	255.986	221.733	210.901	263.94	251.307	225.811	273.251	234.636	300.03	223.722	324.242	234.63	277.203	255.545	276.86	258.88	192.027	227.921	189.888	329.046
KIAA1328_CACTCTCCAGTGTTCATCTG	KIAA1328	234.524	277.362	213.554	245.213	222.183	198.757	238.325	211.982	214.451	199.622	278.285	219.029	227.518	257.873	344.553	292.164	252.289	267.291	392.347	477.887	436.734	418.709	196.855	202.933	251.586	242.656	259.877	259.77	273.9	255.059
C5orf51_AGTAACTGATTCCATCAAGA	C5orf51	238.763	239.599	277.043	165.252	246.661	222.539	226.604	229.753	285.123	275.607	287.204	250.126	209.623	265.457	290.194	308.216	285.229	410.008	271.675	402.841	271.856	401.541	260.687	293.125	314.77	223.61	235.553	348.35	226.715	264.794
RPS15A_CCTCACAGGCAGGCTAAACA	RPS15A	172.361	72.9215	123.515	114.61	171.345	134.203	182.325	120.588	123.066	77.2729	38.3533	73.0097	109.924	87.98	102.864	114.511	89.0873	84.6624	29.0139	7.78778	10.4772	6.67646	66.511	48.8541	99.3708	48.6722	6.4009	10.9482	102.425	71.0661
ALX4_CCTCGCTGCAAGTAAAGATG	ALX4	132.803	147.145	188.159	103.949	190.174	174.974	160.185	215.79	186.426	239.546	236.364	223.085	185.337	200.23	227.054	189.96	195.393	211.656	172.764	111.861	177.561	103.962	220.513	219.217	167.15	171.411	130.578	204.034	189.888	138.238
SPOCK3_TAAGAATGAACAGTGTACCA	SPOCK3	365.915	454.457	481.363	269.201	384.113	431.489	362.045	404.923	445.961	432.728	377.29	424.538	401.351	392.876	546.937	431.824	489.606	549.096	389.709	486.382	517.243	433.97	411.565	362.022	356.127	350.581	499.27	572.29	375.173	467.284
UBXN1_ACTCCCCTTGGACATATCCT	UBXN1	350.374	348.981	355.539	453.11	369.05	341.454	272.185	252.601	302.181	369.622	270.257	297.447	240.3	245.737	355.843	258.987	294.213	344.697	352.782	290.272	316.522	364.344	333.448	437.182	307.303	407.012	538.956	478.733	241.676	307.629
TMEM237_CAGTTATTCAAAAACCTCGG	TMEM237	131.39	101.569	138.522	106.614	137.452	142.697	91.1624	154.861	103.57	121.061	90.0858	135.203	106.09	130.453	86.5565	108.625	98.8196	77.4056	77.8099	124.605	87.6776	120.176	154.448	98.9609	152.215	112.158	136.979	129.387	166.872	113.9
RFX4_GTGGTCCTGTTTCGGCACAA	RFX4	464.811	473.99	446.732	607.701	436.835	479.054	509.207	469.66	527.599	595.001	559.245	712.521	570.072	570.353	597.951	591.818	526.289	607.15	679.848	741.255	740.572	829.788	594.581	608.798	538.785	660.954	490.309	578.262	390.134	564.635
NAGS_ATCTTCCTCAATAACACAGG	NAGS	363.089	346.377	382.089	323.841	380.348	355.044	347.719	280.527	369.197	217.652	315.746	331.248	254.36	348.886	363.37	306.076	337.634	321.717	340.254	305.847	398.134	211.739	334.787	360.769	354.403	337.884	297.002	341.383	334.894	410.82
PCDHGA8_TTAATATTTATCAGACACCG	PCDHGA8	245.827	222.671	228.561	94.6201	193.94	210.648	162.79	214.521	201.048	309.092	214.957	185.228	194.285	189.612	232.49	239.724	276.994	281.805	245.299	131.684	207.89	149.743	256.223	263.061	198.167	232.78	203.549	215.977	268.145	366.039
VWC2_TACGTGTACCCGGACTACCG	VWC2	415.363	481.803	460.585	341.165	395.411	346.55	474.044	519.165	409.407	421.137	409.4	347.472	435.863	418.664	482.124	498.711	497.092	514.022	356.079	356.114	240.976	367.205	338.804	333.21	340.618	380.913	437.822	438.921	386.682	635.701
OR4S2_TGCAGGCAAGTTTCAACACA	OR4S2	220.396	236.995	212.4	201.234	250.427	183.468	251.348	215.79	231.51	261.44	210.497	201.453	309.322	329.167	245.034	253.636	272.502	270.92	148.366	184.783	114.146	158.327	244.171	225.481	200.465	226.431	261.157	265.742	327.989	202.49
ATP5SL_GAGAAGCAACATGGTCCATA	ATP5SL	206.269	218.764	218.172	157.256	201.471	186.865	209.674	211.982	173.023	209.925	187.307	210.917	227.518	160.791	203.22	202.267	175.929	279.386	216.285	135.932	216.713	194.571	179.892	160.342	177.489	147.427	133.139	181.142	243.978	224.88
SLC1A7_TGAGTCGGTCATGAAGATCG	SLC1A7	194.966	235.693	232.024	283.86	237.247	241.226	294.324	250.062	270.501	342.576	175.712	190.636	221.127	238.153	223.291	269.689	275.497	222.541	200.46	178.411	109.735	181.218	264.258	225.481	329.13	170.705	218.911	205.029	218.659	220.986
AQP6_GAGGAAGGCCAGCGTCACGG	AQP6	81.9423	91.1519	115.435	117.276	99.7942	88.3362	114.604	114.242	102.352	94.0153	114.168	124.387	76.6914	54.6083	91.1561	103.274	93.5791	120.946	81.107	70.798	118.006	104.916	81.2416	62.6335	98.7964	91.7012	92.173	76.6371	94.3688	123.636
RPS14_GACTGGTGGGATGAAGGTAA	RPS14	135.629	200.534	251.648	154.591	297.5	276.9	217.487	186.595	95.0409	83.7123	44.5969	48.6731	46.0148	56.1252	52.2684	50.2992	89.836	56.8447	54.0713	0	40.8059	0	60.708	50.1068	49.9726	57.8423	2.56036	0	34.5252	5.84105
CLRN2_CTGGTGAAGGAGCTCAACGC	CLRN2	196.379	119.8	132.75	219.892	112.975	168.179	139.348	123.127	119.41	109.47	156.981	170.356	185.337	268.491	155.133	181.398	113.044	199.561	218.263	321.423	172.598	233.676	124.094	167.858	123.496	202.448	158.742	212.991	168.022	127.53
SCGB1D1_GTGCCTTAAATTTGGCAAGT	SCGB1D1	162.472	130.217	125.824	203.9	120.506	149.492	213.58	201.827	248.568	176.44	182.847	139.259	191.728	212.366	211.583	155.714	190.901	166.906	285.523	263.369	324.242	321.424	195.515	185.395	175.191	178.465	253.476	326.454	196.793	199.569
CRYBB1_AGGACATGAGCCGATCACTG	CRYBB1	398.409	464.874	469.819	459.774	466.961	480.753	565.207	467.122	393.567	439.168	417.427	488.083	387.291	383.775	446.581	414.166	437.95	358.001	565.111	500.542	567.974	466.398	514.679	447.203	411.843	420.415	441.662	445.888	553.553	467.284
KRTAP4-6_GGTTCCGTCTGCTCTGACCA	KRTAP4-6	281.147	257.83	227.406	221.224	244.778	241.226	188.836	115.511	209.577	144.243	162.333	196.045	208.345	238.153	198.202	210.294	186.41	252.778	164.192	173.455	176.458	160.235	124.987	235.502	202.762	225.726	122.897	150.288	196.793	166.47
DUSP5_TGTCTCCCGACGGACCTCCG	DUSP5	706.399	898.497	751.48	912.884	662.784	686.305	625.114	737.494	521.506	701.895	646.655	693.592	779.696	749.347	674.89	618.573	670.027	771.637	776.781	538.773	799.024	611.373	750.815	762.876	710.53	816.846	702.819	543.427	563.911	605.522
VTI1B_CATGGGGTTTCGGAAAGACA	VTI1B	615.98	479.198	557.55	453.11	519.683	509.632	563.905	577.555	559.279	578.259	523.568	481.323	524.058	535.465	600.46	525.466	607.141	671.252	536.097	561.428	646.278	569.406	528.517	527.374	591.055	557.967	495.43	453.851	565.062	535.43
EIF2B5_TCCCGGCACAACATCTACCG	EIF2B5	129.977	139.332	115.435	150.593	150.633	191.961	122.418	109.164	60.9236	28.3334	60.6518	40.561	47.293	22.7535	24.6707	45.4833	20.9617	35.0744	21.7604	14.8676	9.92577	42.9201	42.4063	20.0427	63.7582	36.6805	2.56036	10.9482	44.8827	4.86754
FSCN3_GGAGAACAGCCGGTCTACAT	FSCN3	233.112	328.147	301.285	275.864	237.247	253.117	299.534	297.028	269.283	276.894	309.503	329.896	216.014	297.312	306.92	203.337	262.022	298.737	180.018	182.659	178.664	221.277	278.096	280.598	217.697	233.485	189.467	299.581	271.598	213.198
NPPC_GCCCTCCGAAGCCAAGCCCG	NPPC	125.739	101.569	120.052	141.264	137.452	176.672	105.488	175.171	157.183	230.531	146.278	159.54	88.1951	197.197	193.184	159.459	140.743	129.412	93.6357	143.72	89.3319	103.008	208.014	150.32	132.686	193.278	180.505	119.434	134.648	151.867
TLK2_AGAGCTGGAGAGACTAGAAA	TLK2	541.102	487.011	485.98	331.837	551.692	477.355	419.347	489.97	511.759	387.652	498.593	470.507	411.577	414.113	328.664	315.173	314.426	360.42	433.889	308.679	459.894	371.02	433.437	412.128	487.089	420.415	500.551	296.595	477.598	367.986
ORC5_GTTTACCTATGCTGTAATCA	ORC5	241.588	242.204	308.211	183.91	306.914	207.25	216.185	218.329	213.233	314.243	274.717	283.927	258.194	227.535	264.687	369.753	291.967	304.785	204.416	189.031	154.952	254.659	288.809	184.142	225.164	198.216	104.975	136.354	217.508	262.847
TRIB1_GTTTCCCATTAAACACTACC	TRIB1	423.839	394.557	376.317	367.819	410.474	339.755	351.626	326.224	470.331	535.759	421.887	429.946	442.254	486.924	447	422.192	421.48	385.819	502.468	346.202	577.9	443.508	362.463	492.299	385.421	395.726	486.469	541.436	433.866	514.012
ZNF800_AAAGAATTCAATTCTAGACG	ZNF800	461.985	394.557	339.378	258.539	410.474	276.9	287.813	376.998	406.97	413.41	346.964	371.809	456.314	320.065	411.875	469.816	464.901	425.731	561.155	434.7	494.083	440.646	362.016	512.342	437.117	419.004	341.808	402.096	383.229	476.046
GLE1_GTTCAGATGCCATCTCCGAG	GLE1	132.803	148.447	102.737	118.608	160.047	171.576	144.558	102.818	152.309	113.334	96.3293	101.402	70.3004	113.767	94.9195	85.0806	80.8524	81.034	81.7664	82.1257	51.8346	75.3486	120.523	156.584	132.686	174.232	66.5694	80.6182	94.3688	47.7019
ARL17B_GCCAATAAAATGTAGTCACG	ARL17B	206.269	196.628	230.869	241.215	303.148	229.334	269.58	231.022	266.846	253.713	203.362	191.989	177.668	229.051	225.8	220.46	142.989	209.237	237.386	145.136	232.704	189.802	224.53	147.815	156.811	202.448	79.3712	59.7172	163.419	171.337
WDR61_GAATATTCTTTGGACACGAG	WDR61	394.171	335.96	364.774	322.508	344.572	336.357	329.487	363.035	548.313	434.016	395.129	466.451	375.788	380.741	362.116	369.218	416.24	328.974	460.266	222.306	431.219	130.668	297.291	399.602	408.971	356.929	199.708	347.355	562.76	426.397
TSHR_CATTACACATCAAGGACTCA	TSHR	241.588	307.312	303.593	251.876	256.076	256.515	251.348	283.066	378.945	396.667	344.288	392.089	296.54	286.694	248.38	239.189	271.005	312.041	290.798	322.131	404.751	399.634	276.757	254.292	301.559	311.079	336.688	288.633	279.654	267.715
BBOX1_ATAAAGCAAACAGTCACAGG	BBOX1	508.607	485.709	612.958	530.406	562.99	485.849	535.254	524.243	587.304	553.789	468.268	451.579	586.689	492.992	480.451	440.386	473.885	487.413	516.975	514.702	532.131	599.927	463.345	641.367	470.432	450.041	348.209	441.907	528.235	496.489
TMEM249_CTGGAAGCGCCAGCCGATGG	TMEM249	295.275	263.038	290.895	321.175	278.671	326.165	299.534	250.062	311.929	417.274	212.281	227.141	337.442	365.572	271.378	286.813	253.038	304.785	234.089	216.642	182.524	242.26	319.61	285.609	288.348	332.946	364.851	372.237	264.693	319.311
BAP1_GAACCGTCAGACAGTACTAG	BAP1	144.105	201.836	146.602	211.896	139.335	159.685	153.674	186.595	143.78	141.667	117.736	231.197	108.646	221.467	141.752	212.434	102.563	235.845	126.606	106.905	67.2746	202.201	102.668	220.47	89.6061	299.792	62.7289	86.5899	110.48	230.721
CHST10_GGAACCGGACAGAGACCCGG	CHST10	79.1167	54.6911	58.8717	49.3091	94.1454	91.7338	57.3021	57.1209	67.016	52.8031	63.3276	27.0406	33.2329	45.5069	53.1047	75.4488	53.9016	74.9867	99.5703	124.605	90.4348	120.176	69.6357	47.6015	61.4606	87.4689	32.0045	45.7832	56.3911	86.6422
SH3TC1_AAATGGAATCAAAGGCTCCG	SH3TC1	163.885	257.83	242.413	175.913	161.93	174.974	175.813	209.443	144.998	211.213	214.065	166.3	168.721	150.173	240.017	247.75	233.574	234.636	234.749	222.306	162.121	213.647	239.261	165.352	266.521	232.78	261.157	235.883	214.056	255.059
OR10H2_TGGAAATAATGTACCAGCTG	OR10H2	289.624	308.614	249.339	309.181	314.446	244.623	244.836	274.18	398.441	324.546	270.257	250.126	378.344	367.089	235.835	197.451	315.923	228.588	214.966	133.1	205.684	129.714	310.682	195.417	256.181	284.274	357.17	393.138	231.319	236.562
MED7_TATTCCTTGATATATTGCAT	MED7	275.496	195.325	237.796	77.2953	323.86	229.334	192.743	201.827	174.242	148.106	123.087	112.219	97.1424	83.4293	132.553	148.757	172.186	143.926	61.9842	82.1257	41.9088	60.0881	112.488	65.1388	129.814	88.1743	37.1252	32.8445	102.425	45.7549
FRAS1_TTCCATGACTATATTCTACG	FRAS1	180.838	207.045	152.374	146.595	180.759	186.865	117.209	161.208	230.291	285.91	239.039	216.325	304.209	239.67	232.072	191.565	173.683	249.149	181.996	180.535	186.384	244.168	230.78	205.438	191.849	227.842	281.64	224.935	269.296	284.264
SF3A2_GAGGCCGCTTCACCCCAGGG	SF3A2	151.169	96.3605	174.306	145.262	143.101	127.408	125.023	123.127	144.998	109.47	165.009	118.979	121.428	110.733	101.192	123.073	104.06	151.183	94.9545	64.4262	35.843	28.6134	138.379	100.214	138.43	90.2904	166.423	143.321	103.575	86.6422
CENPC_ATCAACTTCGTATCATCGGG	CENPC	445.031	381.536	415.565	429.122	414.24	416.2	459.719	439.196	394.785	461.062	355.883	309.615	345.111	307.93	362.952	375.104	411.748	339.859	480.048	361.778	387.105	362.436	391.477	324.442	262.5	352.697	314.924	281.666	317.631	325.152
TOX4_TCTATTACTATGTCTCAAGG	TOX4	440.793	326.845	449.041	279.862	380.348	360.14	313.859	297.028	382.6	346.44	295.232	390.737	300.374	239.67	316.538	355.305	268.011	353.163	330.363	169.207	272.959	138.298	295.952	384.57	373.933	359.046	229.152	257.779	347.553	254.086
EFCAB3_AGATAAGAATCTCTTCCTCA	EFCAB3	211.92	231.786	252.802	238.549	271.139	219.142	184.929	214.521	308.274	341.289	256.878	263.646	240.3	280.626	349.989	372.428	294.213	279.386	491.258	432.576	521.103	454.953	238.815	231.744	242.97	186.224	281.64	278.68	322.235	405.953
NOP14_CGGAAGACGCGCCACGACGT	NOP14	310.816	235.693	320.909	350.494	342.689	365.236	268.278	267.833	283.904	267.879	218.525	269.054	193.007	279.109	317.792	246.145	225.339	291.48	218.263	232.217	277.37	311.886	208.907	241.765	224.015	287.095	179.225	246.831	356.76	270.635
OR1E2_GAAACAAATACACAGGCGTG	OR1E2	385.694	437.529	341.687	243.88	344.572	358.441	390.696	335.109	411.844	415.986	299.691	356.936	425.637	486.924	427.347	475.167	429.715	426.94	387.731	407.089	475.334	335.73	458.881	419.644	477.899	433.112	508.232	600.158	394.738	425.423
SLC8B1_TGGCTGTCACTCTCTACGTG	SLC8B1	274.083	276.06	328.989	307.849	280.553	329.562	273.487	303.375	265.627	381.213	284.528	260.942	278.645	327.65	254.234	329.085	268.011	285.433	242.662	262.661	273.51	283.273	342.375	353.253	394.611	362.573	271.398	218.963	238.224	237.536
ABCC11_CAAAGACCAGAGCTTTGCTG	ABCC11	330.595	369.816	356.693	327.839	274.905	331.261	309.952	324.954	292.433	346.44	259.554	202.805	337.442	306.413	254.234	297.514	289.721	290.271	261.784	283.192	234.358	254.659	237.475	243.018	287.199	302.614	270.118	300.577	276.201	309.576
ST3GAL6_CATACCCTGTAAAAAGTGTG	ST3GAL6	234.524	222.671	248.185	303.851	176.993	166.48	186.232	210.712	194.956	222.803	229.228	205.509	210.901	239.67	250.888	284.137	303.945	307.204	141.772	179.119	161.018	159.281	191.498	187.9	136.132	217.967	225.312	268.727	254.335	336.834
TSC22D1_ACTCCTAGATCCATCGCCAC	TSC22D1	291.036	256.527	247.03	329.171	197.705	212.347	299.534	199.288	196.174	207.349	201.578	152.78	375.788	385.292	218.273	254.707	290.47	266.082	396.303	266.201	303.287	287.088	253.992	256.797	199.316	186.224	298.282	228.916	182.983	234.615
TERF2IP_AGCCATCCTTACCTACGTGA	TERF2IP	298.1	246.11	272.426	342.498	301.265	315.972	283.906	274.18	296.089	350.304	272.041	263.646	249.247	213.883	303.575	303.936	282.235	290.271	241.343	357.53	314.316	324.285	291.041	278.093	289.497	343.527	311.084	363.28	293.464	307.629
PGA4_GATCTGCCAGTAACCCTCGA	PGA4	145.518	119.8	197.393	193.238	152.516	190.263	151.069	181.517	174.242	144.243	185.523	150.076	153.383	156.24	163.496	169.091	160.956	135.46	228.814	179.827	179.215	241.306	62.4935	116.498	115.454	152.365	124.178	147.302	157.665	114.874
APOC4_GTGGTGAACAGGACCAGAGA	APOC4	300.926	222.671	232.024	218.559	344.572	276.9	286.51	252.601	266.846	225.379	196.226	313.671	281.202	289.727	242.525	202.267	239.563	217.703	265.081	337.707	274.061	590.39	253.099	275.587	235.503	289.917	335.407	397.119	294.615	324.178
ACSL4_ACCTGGTCAGAGAGTGTAAG	ACSL4	721.94	565.142	746.863	630.357	758.812	689.702	772.276	629.599	900.451	911.82	686.792	753.082	787.365	722.043	813.715	686.531	765.852	720.84	661.385	844.62	797.37	877.477	957.044	656.399	848.96	677.178	802.673	343.374	761.855	711.634
EDRF1_GTAAGAGAGTCCTTCCTATG	EDRF1	339.072	269.549	313.982	251.876	201.471	244.623	223.999	285.604	216.888	369.622	247.067	300.151	231.352	192.646	202.801	193.17	159.459	185.048	323.768	308.679	449.417	290.903	218.727	251.787	246.417	227.842	225.312	252.803	276.201	197.622
MAN1B1_GTGCTGTCGGAGGTCCACCG	MAN1B1	127.152	104.174	117.743	182.577	141.218	139.299	131.534	139.629	98.6963	145.531	122.196	117.627	144.435	194.163	185.239	142.336	118.284	122.156	73.8535	65.1342	50.7317	64.857	152.216	207.943	227.462	167.884	113.936	137.35	101.274	229.748
C6orf89_AGACAGACCGGCCATCAGTG	C6orf89	396.996	351.586	408.639	279.862	444.367	473.958	418.045	321.146	302.181	360.607	423.671	378.569	333.607	350.403	385.114	357.445	312.929	366.467	409.491	546.561	460.997	485.474	450.846	329.452	407.822	387.967	462.145	462.808	388.983	412.767
C1orf146_GTATTCGTAAGTTACAACCC	C1orf146	231.699	276.06	264.346	245.213	301.265	300.683	244.836	298.298	297.307	216.364	256.878	333.952	392.404	323.099	329.082	278.251	342.125	295.109	298.052	241.421	296.119	247.983	247.742	319.431	279.732	312.49	385.334	408.068	222.112	225.854
RARS2_ATTGTGGTTGAATTCAGGTG	RARS2	190.728	197.93	234.332	209.23	293.734	231.033	223.999	208.174	193.737	177.728	173.036	181.172	175.112	109.217	109.973	142.871	94.3278	158.44	93.6357	76.4619	74.9947	70.5797	153.556	136.541	241.821	112.863	35.8451	28.8633	209.453	145.053
WIPF2_TGGTGGTATTAGGCCGAGAG	WIPF2	144.105	192.721	129.287	125.272	96.0284	120.613	114.604	156.13	164.494	96.5911	207.822	197.397	121.428	138.038	155.969	156.249	124.273	131.831	148.366	145.136	183.627	123.038	150.877	131.53	122.921	116.39	103.695	125.406	181.832	215.145
CAPRIN1_CAATAAAGAAGACAGCACGT	CAPRIN1	148.344	158.865	94.6565	242.547	94.1454	151.191	140.651	120.588	106.007	153.258	121.304	135.203	127.819	106.183	130.88	130.029	98.8196	146.345	90.3387	43.1868	20.9544	41.0125	99.5433	103.972	91.3293	102.988	79.3712	142.326	93.2179	139.212
TUBB2B_GAGCATGGGATTGACCCCAC	TUBB2B	425.252	434.925	424.8	419.793	438.718	509.632	494.882	464.583	383.819	311.667	274.717	354.232	308.044	344.336	324.901	268.619	309.185	325.345	236.727	203.19	297.222	200.294	315.146	329.452	350.957	361.867	426.3	350.341	372.872	287.185
OXT_GACTCACCTTGCGCACGTCG	OXT	737.481	759.165	810.352	1094.13	685.379	684.606	726.695	681.642	774.949	820.38	730.497	754.434	849.996	770.584	745.975	728.803	717.191	672.461	642.921	639.306	718.515	647.616	636.541	717.78	679.513	754.772	783.471	753.432	742.291	841.111
LARP1_TGTGAATAATCCACTATTGG	LARP1	199.205	144.541	148.911	86.624	173.228	156.287	104.186	130.743	193.737	160.985	145.386	108.163	168.721	95.5645	171.44	210.829	153.47	235.845	212.329	164.251	209.544	144.021	218.727	206.691	174.617	163.651	44.8063	75.6418	124.291	122.662
MFSD12_TCGGCCTCGTAGCCCACGAG	MFSD12	218.984	177.095	244.722	241.215	193.94	232.732	230.511	239.908	254.661	239.546	123.979	164.948	213.458	165.342	232.072	229.557	208.12	261.244	248.596	283.192	331.962	333.823	193.73	205.438	215.974	173.527	193.307	257.779	172.626	180.099
MUC16_ACACAGTTGAAACTAGTCGG	MUC16	361.676	329.449	386.706	319.843	387.879	370.333	378.975	342.725	293.652	423.713	408.508	440.762	366.84	389.843	329.082	324.804	364.584	393.075	255.19	237.881	333.616	264.197	352.642	285.609	382.549	345.643	290.601	249.817	382.078	430.291
TAF10_TGCATCAAGAAGTCCACCAA	TAF10	238.763	145.843	223.943	151.925	261.724	258.214	166.697	165.016	174.242	163.561	221.201	174.412	139.323	150.173	211.164	184.074	188.656	182.629	173.424	142.304	99.8091	260.382	181.231	140.299	140.153	170	193.307	113.463	140.402	132.397
TSFM_TAAAATGTGTGCCTTGGCTG	TSFM	118.675	135.426	152.374	62.6359	167.579	178.371	181.022	124.397	134.032	99.1669	128.439	147.371	77.9696	97.0814	116.663	112.371	98.8196	171.744	127.265	136.64	168.187	84.8864	136.147	126.52	124.644	132.614	87.0523	136.354	120.838	130.45
SYT7_CCCACGATGAGTCCGACCGC	SYT7	168.123	102.871	141.985	130.602	141.218	161.384	167.999	176.44	186.426	154.546	129.331	154.132	149.548	145.622	222.873	194.776	176.677	194.723	137.816	244.961	125.726	181.218	149.092	199.175	149.918	183.402	180.505	199.057	102.425	115.847
CCDC117_TATCAGAAAGGAGTTCAGGG	CCDC117	381.455	279.966	364.774	302.518	329.509	344.851	377.673	267.833	297.307	303.94	257.77	310.967	346.389	333.717	426.092	450.553	416.24	413.636	516.975	568.508	529.374	569.406	395.495	283.103	401.504	286.39	387.895	391.148	296.916	340.728
SLC25A4_TGGTAACCTGGCGTCCGGTG	SLC25A4	142.693	167.98	132.75	158.589	171.345	168.179	71.6276	111.703	179.116	155.834	181.063	120.331	199.398	285.177	112.064	144.476	110.049	122.156	216.945	100.533	197.412	118.269	147.306	181.637	94.2012	138.963	143.38	91.5664	155.363	145.053
SKI_TGCAACGCGCTGCTCTACGG	SKI	220.396	127.613	253.956	123.939	192.057	163.082	173.209	153.592	158.401	185.455	219.417	221.733	140.601	148.656	157.223	117.186	178.175	158.44	71.8753	82.8337	131.241	72.4873	203.104	202.933	182.659	174.232	217.631	262.756	239.374	209.304
KRTAP26-1_GTATGGTCTTGAGAGCTAGT	KRTAP26-1	155.408	205.743	178.924	223.89	143.101	178.371	192.743	220.867	174.242	225.379	237.256	227.141	226.24	257.873	206.983	157.319	183.415	195.933	224.858	184.783	280.127	231.768	205.336	171.616	145.323	184.813	343.088	227.921	214.056	177.178
OR9A4_TACTTACTGCAAATCAAATG	OR9A4	374.391	350.284	437.498	318.51	436.835	433.187	393.301	295.759	456.927	457.198	453.997	492.14	488.268	477.823	447.418	424.868	483.617	448.711	258.487	382.309	304.39	222.231	505.305	571.217	369.338	445.104	439.102	353.327	452.28	439.052
VPS54_CTCCTAAAGATACCTTCGAA	VPS54	115.849	136.728	148.911	79.9607	133.687	81.5412	121.116	112.972	135.25	131.364	123.979	152.78	113.759	92.5307	182.73	134.845	125.022	101.595	79.7882	62.3023	70.5832	78.2099	109.81	129.025	132.686	140.373	174.105	57.7266	159.967	144.079
PRKCH_TATTCGATGTCAAGCGAACG	PRKCH	353.199	372.42	282.815	346.496	370.933	409.405	405.022	463.314	391.13	359.319	408.508	404.258	332.329	394.393	426.092	339.787	434.956	339.859	378.499	392.929	313.213	455.907	403.083	294.377	332.002	359.751	326.446	402.096	361.363	433.211
GNE_ACATGAGCATCATTCGCATG	GNE	251.478	223.973	226.252	277.197	160.047	214.046	205.767	192.942	226.636	255.001	253.31	231.197	190.45	268.491	171.022	149.827	211.863	191.095	145.729	127.436	100.912	78.2099	216.495	162.847	199.89	205.975	124.178	93.557	222.112	164.523
GNRH2_GAGCCTCTGAGGGTCCAAGG	GNRH2	175.187	200.534	182.387	170.583	118.623	115.517	169.302	139.629	146.217	168.712	140.034	197.397	152.105	116.801	137.989	101.669	103.311	160.859	153.642	141.596	106.978	138.298	98.6505	127.772	106.264	105.809	98.5739	71.6606	73.6537	141.159
FAM175A_GCCGAGCAGTACAAACACAC	FAM175A	552.404	557.329	603.724	463.772	491.439	531.716	461.021	421.425	601.926	484.243	490.566	511.068	599.471	500.576	512.231	581.652	513.562	545.468	505.105	679.661	601.06	488.335	384.782	528.627	545.104	515.643	592.724	629.021	568.514	473.125
LRP2BP_TAGGAGTGATGTACTATGAT	LRP2BP	121.501	181.002	140.83	131.935	163.813	202.154	136.744	162.477	164.494	176.44	213.173	198.749	227.518	162.308	142.588	142.871	160.956	142.717	263.763	234.341	233.807	270.873	183.463	235.502	220.569	237.012	206.109	244.841	158.816	148.947
CARD18_AGAGGATGAAGTTATTAGCC	CARD18	223.222	171.886	273.58	254.541	209.003	256.515	195.348	251.332	280.249	318.107	309.503	242.014	290.149	251.805	209.492	252.031	326.404	342.278	313.877	438.948	318.176	417.755	285.238	245.523	243.545	292.739	437.822	349.346	255.486	261.874
GRIK4_GCATCAACCGCGCTCCTGAG	GRIK4	415.363	291.686	312.828	423.791	337.041	360.14	338.603	396.038	331.425	415.986	219.417	301.503	338.72	257.873	256.324	294.304	287.475	253.987	201.119	221.598	201.824	177.403	319.61	320.684	306.728	339.295	418.619	352.331	300.369	301.788
LRRC75A_AAGTCCGGCCGTTCGCGTCG	LRRC75A	418.188	244.808	220.48	279.862	263.607	248.021	240.929	253.87	198.611	365.758	251.527	219.029	246.691	260.906	353.753	263.268	316.672	331.393	379.159	383.725	326.999	246.075	330.769	313.167	302.133	282.158	314.924	258.775	261.24	279.397
AQP5_GGTGCGGCGGGAGTCAGTGG	AQP5	128.565	126.31	135.059	99.9508	161.93	108.722	143.255	158.669	58.4867	92.7275	55.3002	95.9943	93.3078	98.5983	40.1422	77.5892	61.3879	81.034	58.6872	24.0713	16.5429	29.5672	125.433	76.4129	74.0973	111.452	42.246	2.98586	64.447	63.278
PHKG1_TCCGAGTAATCATCCCACTC	PHKG1	327.769	272.153	242.413	298.52	248.544	297.285	311.254	349.072	199.83	294.925	278.285	358.288	329.773	332.2	238.762	289.488	278.492	275.757	367.949	303.016	320.382	248.936	268.722	291.872	276.285	364.689	369.972	493.662	293.464	454.628
VTI1B_AAGCTGCACGAGATCTTCCG	VTI1B	973.418	1076.89	873.841	923.546	1101.5	864.676	886.88	905.048	838.309	828.108	692.144	800.403	958.642	882.834	852.603	791.945	831.731	754.705	938.335	1001.79	1001.95	995.746	855.715	899.417	785.202	884.564	903.808	1150.55	825.151	997.846
MRPS12_CTCAACACGTCCCTAACTTG	MRPS12	288.211	255.225	267.809	238.549	359.636	305.779	263.069	215.79	141.343	91.4396	130.223	164.948	247.969	124.386	212.419	211.899	201.382	136.669	168.808	107.613	100.912	110.638	180.785	165.352	144.748	125.56	98.5739	69.6701	157.665	179.126
OR13G1_TAGCCCTGTAAGAATCAATG	OR13G1	217.571	272.153	287.432	229.221	306.914	246.322	279.999	309.722	205.922	209.925	205.146	198.749	231.352	219.95	217.437	211.899	227.584	209.237	258.487	283.192	268.547	185.033	296.844	298.135	275.137	241.245	300.842	242.85	311.877	340.728
COL3A1_CCAGGACTACCATTAATCCC	COL3A1	336.246	334.658	325.526	266.536	288.085	236.13	289.115	270.372	252.224	306.516	270.257	231.197	231.352	253.322	319.046	316.243	360.841	351.954	252.553	305.847	292.81	272.781	357.106	349.495	336.597	279.336	339.248	256.784	317.631	328.072
TNNI2_CAGAAGCTATTTGATCTGCG	TNNI2	176.6	210.951	148.911	117.276	158.164	122.312	192.743	140.898	292.433	262.728	240.823	198.749	132.932	224.501	165.586	184.074	170.688	174.163	166.83	151.508	200.17	124.945	131.236	139.046	129.814	121.328	226.592	217.968	209.453	233.642
OR4C16_ACTCCTGGTTTCCAATAGTG	OR4C16	323.531	326.845	310.519	343.831	325.743	293.888	250.045	305.914	377.727	279.47	298.799	263.646	227.518	242.704	313.192	245.075	331.644	318.089	240.024	383.017	248.696	262.289	441.919	478.52	361.296	268.05	285.48	351.336	246.279	257.006
SERPINC1_CAGTTCCCAGACACGCCGGT	SERPINC1	204.856	166.678	122.361	131.935	190.174	195.359	205.767	134.551	249.787	177.728	117.736	129.795	162.33	150.173	130.462	179.793	159.459	139.088	115.396	66.5501	60.106	41.0125	279.435	166.605	242.97	205.27	176.665	195.076	139.251	140.185
CENPQ_AGACCACAGAGTTAATGACT	CENPQ	477.526	515.659	549.469	403.801	510.268	395.814	424.556	379.536	542.22	587.274	654.683	547.573	494.659	452.035	526.029	499.246	575.699	610.779	682.486	581.252	759.873	564.638	472.719	499.815	457.795	477.552	852.6	696.701	664.034	557.82
SART1_GAAGATAAAGACCCTAGGAG	SART1	209.094	190.117	173.152	186.575	205.237	231.033	157.581	149.784	107.226	150.682	74.0309	68.9536	107.368	124.386	93.665	103.274	112.295	77.4056	28.3545	71.506	69.4804	75.3486	84.3663	135.288	94.2012	98.7552	88.3325	85.5947	102.425	84.6952
SULF1_ACTGCCCAATATGGTAACCA	SULF1	240.176	278.664	227.406	246.545	291.851	288.792	326.882	247.524	321.677	274.319	259.554	269.054	296.54	254.839	296.048	267.549	192.399	240.683	476.751	593.287	440.042	393.911	235.244	304.399	252.735	270.871	322.606	252.803	351.006	254.086
FGL1_TCATTGATCTTGGAAGCAAG	FGL1	203.443	243.506	264.346	315.845	235.364	231.033	210.976	248.793	232.728	280.758	264.906	205.509	240.3	327.65	307.756	286.813	332.393	278.176	193.206	249.209	231.601	275.642	250.421	365.78	285.476	369.626	226.592	284.652	357.911	252.139
COPS6_TGGGTTGGTATACCACAGGG	COPS6	115.849	108.08	137.367	61.3032	169.462	147.793	152.371	124.397	149.872	83.7123	67.7873	64.8975	100.977	69.7773	73.5939	54.0449	65.1311	47.169	29.6733	14.1596	12.6829	19.0756	94.6331	73.9075	78.1181	59.2531	28.164	15.9246	100.123	42.8344
BEND4_ATTTCTTGCGTAAAGCAGGA	BEND4	895.714	847.712	812.66	787.612	743.749	827.303	668.09	869.506	793.226	816.517	842.882	866.652	815.485	869.182	922.015	858.832	899.108	927.658	869.757	1018.08	873.467	1082.54	836.074	726.549	790.371	904.315	779.63	888.791	940.235	855.714
ATP2B4_TAGACTGAAAACCTCCCCTG	ATP2B4	445.031	410.183	335.915	377.148	301.265	422.995	339.906	330.032	292.433	303.94	351.424	327.192	265.863	251.805	265.942	294.839	298.705	321.717	323.109	349.034	207.338	245.121	349.964	387.075	292.943	381.618	372.533	400.105	295.765	225.854
RNASET2_TTAGTGTGCTTCTAAAATTG	RNASET2	268.432	420.601	324.372	259.872	282.436	281.996	220.092	324.954	305.837	248.561	239.039	231.197	388.57	361.022	365.461	333.366	357.847	276.967	350.804	564.968	269.099	468.306	284.792	251.787	236.652	247.593	318.765	402.096	313.028	266.741
ZSWIM6_CCAACAGCGCGATGCCCCGG	ZSWIM6	110.198	169.282	146.602	143.929	160.047	144.396	130.232	165.016	104.789	39.9243	107.925	110.867	145.714	127.419	113.318	159.994	113.792	146.345	133.2	140.18	166.532	123.038	109.364	205.438	93.6268	169.295	177.945	109.482	113.933	118.768
ZNF330_AGGAATGTGACAAGTGTCAG	ZNF330	577.834	609.415	607.187	493.091	627.009	548.704	573.021	588.979	508.103	524.168	577.084	507.012	625.035	553.667	647.292	487.474	631.846	550.305	705.565	824.089	794.061	776.377	546.818	544.911	624.945	462.739	737.384	846.989	483.352	580.211
FOXI2_CCCCCCGGGCTATGAGCCAG	FOXI2	250.065	230.484	227.406	211.896	305.031	241.226	210.976	217.059	247.35	367.046	295.232	321.784	269.698	276.075	308.593	307.681	309.934	373.724	350.145	465.143	305.493	349.083	217.388	294.377	256.181	262.407	353.33	328.445	362.514	320.284
TAP1_GGCTCCAAGAGCGAAAACGC	TAP1	511.433	496.127	466.356	533.071	355.87	366.935	415.44	443.004	413.062	522.88	432.59	404.258	419.246	520.296	421.911	430.219	436.453	437.825	360.695	442.488	333.616	508.365	478.522	557.438	423.331	496.597	409.658	479.728	455.732	525.694
C4orf48_CGGCGGCGGCGGTGACATCG	C4orf48	128.565	143.239	75.0326	141.264	128.038	100.228	65.116	85.0466	79.2007	101.743	115.952	117.627	122.706	106.183	97.8465	122.002	142.989	93.1286	120.671	197.526	153.298	182.172	105.793	102.719	101.094	95.2282	119.057	133.368	69.0503	156.735
NCALD_CCATTGACAAATGTCCACTG	NCALD	512.846	441.435	474.437	370.484	551.692	552.102	520.928	520.434	434.995	435.304	454.888	439.41	461.426	427.765	344.135	435.57	429.715	449.92	369.268	310.803	322.036	432.062	516.464	521.111	453.774	516.348	361.011	308.539	398.19	378.695
FBXL22_GTTCGCCGACTTGCGCTCGG	FBXL22	378.63	341.168	361.311	445.114	367.167	326.165	401.115	417.617	272.938	332.273	304.151	355.584	458.87	359.505	384.277	368.683	315.923	374.933	435.208	282.484	329.756	322.378	324.966	266.819	317.068	380.913	321.325	298.586	293.464	344.622
SCGB2A2_TATTCAGTCTTAGACACTTG	SCGB2A2	170.949	216.16	264.346	223.89	248.544	283.695	237.022	186.595	175.46	190.606	193.551	198.749	161.052	197.197	194.439	139.661	158.71	209.237	177.38	60.8863	205.133	82.9788	178.999	209.196	192.998	218.672	200.988	195.076	159.967	128.503
TEX35_AAGCAGTTAAACAAGAAGGG	TEX35	268.432	220.067	272.426	178.579	229.715	249.72	264.371	257.679	171.805	227.955	258.662	243.366	221.127	274.558	205.31	235.443	226.836	198.352	271.016	327.087	233.256	271.827	237.922	349.495	270.541	388.672	221.471	250.812	197.944	202.49
SCAND1_CTGCACCAGCGAAGCGCCTG	SCAND1	241.588	246.11	217.017	470.435	237.247	275.201	266.976	341.456	205.922	217.652	252.418	301.503	173.834	300.346	222.036	287.348	274	312.041	248.596	344.078	216.713	339.546	157.127	202.933	229.759	294.149	322.606	365.27	188.738	254.086
NUPL2_CGGTGCTGGAACGAACATCC	NUPL2	91.8319	97.6627	87.7304	106.614	146.867	93.4326	102.883	105.356	113.318	109.47	156.981	116.275	102.255	113.767	143.425	118.792	153.47	122.156	110.78	144.428	115.249	152.605	114.274	110.235	83.2877	141.784	111.376	90.5711	77.1062	143.106
ARHGEF33_AGTGTGAGATAAATACTCGG	ARHGEF33	124.326	114.591	81.9586	107.947	64.0189	42.4694	88.5578	106.626	68.2345	100.455	79.3825	100.05	77.9696	104.666	94.0832	107.02	131.759	126.994	90.3387	109.737	145.026	118.269	103.561	112.74	139.579	136.846	88.3325	58.7219	49.4861	33.0993
DSTYK_TCTGGATGATGCTACTAACA	DSTYK	237.35	197.93	215.863	318.51	233.481	217.443	246.138	272.911	182.771	160.985	223.876	225.789	158.495	266.974	220.364	262.198	268.759	289.062	213.648	170.623	255.864	178.357	261.58	241.765	221.718	294.149	231.713	140.335	219.81	186.914
STXBP4_AGAAAAAAGACTTAATGTTG	STXBP4	606.09	647.178	621.039	287.858	707.974	766.147	509.207	741.302	665.286	891.214	695.712	653.031	593.08	517.262	799.916	676.899	685.748	701.488	609.951	608.155	691.495	567.499	812.416	577.481	817.943	726.556	728.423	884.81	736.537	955.985
RIPPLY3_TACAGGATGCTGAAACCCAA	RIPPLY3	214.745	177.095	220.48	162.587	205.237	144.396	134.139	195.48	160.838	194.47	198.902	183.876	164.886	148.656	170.604	158.389	100.317	143.926	226.836	236.465	230.498	228.907	193.284	204.185	130.963	158.008	175.385	136.354	227.866	219.039
RIPPLY1_AAGATGGGCTTAACAGGCCA	RIPPLY1	370.153	319.032	279.352	183.91	273.022	312.574	286.51	333.84	339.954	409.546	297.015	356.936	350.224	401.978	284.758	362.261	319.666	428.15	398.941	506.914	387.105	405.356	383.442	334.463	269.967	277.22	430.141	490.676	428.112	433.211
HAGH_GAAGTTCTATGAAGGGACTG	HAGH	190.728	256.527	190.467	177.246	186.408	200.455	217.487	255.14	268.064	247.273	181.955	179.82	217.292	177.477	255.07	273.435	244.054	208.028	280.248	317.175	293.362	366.251	196.855	122.762	159.108	136.846	200.988	179.152	231.319	196.649
PIGB_TTTAACGTGCTGCAGAACTG	PIGB	214.745	134.123	271.272	206.565	190.174	195.359	234.418	168.824	208.359	195.758	194.443	233.902	214.736	212.366	254.234	226.346	262.022	268.501	301.349	213.102	381.591	253.705	176.321	171.616	172.319	185.519	181.786	205.029	170.324	198.596
MAPT_ACGAAGATCGCCACACCGCG	MAPT	337.659	394.557	345.15	405.134	374.699	378.827	364.65	350.341	375.29	307.804	377.29	287.983	333.607	382.258	367.133	296.444	350.36	335.021	309.262	278.236	290.604	242.26	302.647	328.2	292.943	303.319	459.585	301.572	392.436	439.052
MDM1_TTTATAGGAAGCGAGTTCAG	MDM1	98.8959	49.4824	92.3478	141.264	105.443	110.42	164.092	107.895	65.7975	148.106	85.6261	85.178	67.744	77.3618	103.282	136.45	102.563	101.595	137.157	89.2055	157.158	119.222	78.5633	60.1282	137.281	143.195	120.337	77.6324	101.274	84.6952
MADCAM1_GGGAGAAGGAGAGCGCGTTG	MADCAM1	128.565	122.404	136.213	183.91	103.56	146.095	114.604	67.2757	134.032	172.576	110.6	137.907	93.3078	95.5645	108.718	88.8263	71.1201	88.2908	140.454	70.09	118.006	51.5041	108.917	103.972	129.24	129.087	42.246	74.6465	89.7654	94.4303
CD22_GCTGCACCGTGTCATTGGAG	CD22	350.374	251.319	446.732	378.48	299.383	355.044	371.161	310.991	297.307	238.258	298.799	339.36	191.728	265.457	198.62	233.838	202.131	250.359	275.632	341.954	361.739	379.604	313.807	274.335	308.452	324.481	299.562	282.661	229.017	261.874
ALOX12B_CAAGACGTGGGTACGCTATG	ALOX12B	405.473	470.083	437.498	559.725	457.547	399.212	464.928	374.459	439.869	453.334	410.292	473.211	506.163	497.542	464.144	620.714	509.071	575.704	576.321	522.489	453.277	527.44	413.35	444.698	487.664	352.697	358.451	473.756	527.084	522.774
ZNF791_CATCCCTTACTAGACACATG	ZNF791	685.207	575.559	742.245	621.028	510.268	552.102	608.183	476.007	482.515	569.244	594.923	515.124	570.072	711.425	513.485	702.584	655.803	563.61	530.163	773.114	533.786	681.952	481.647	559.943	520.404	534.689	491.589	480.723	532.838	509.145
TRAPPC1_ACATCTTGCTGACAAACGAG	TRAPPC1	158.233	165.376	135.059	237.217	273.022	229.334	170.604	132.013	120.629	96.5911	186.415	143.315	145.714	104.666	76.521	81.3349	92.0819	78.6151	48.1367	75.7539	57.9003	58.1806	95.5258	119.004	84.4365	143.9	26.8838	29.8586	50.6369	275.503
HMGCL_AGTCAGCCAATATTTCTGTG	HMGCL	666.841	617.228	647.589	389.142	698.559	613.257	604.276	634.676	668.942	753.411	652.007	509.716	697.891	729.628	633.493	572.02	606.393	596.265	805.135	988.34	740.572	811.666	652.611	667.673	794.392	716.68	672.095	665.847	734.235	674.641
PCDH17_CACCGTACAGATCAACGTGA	PCDH17	371.566	265.643	304.748	275.864	359.636	254.816	285.208	280.527	282.686	297.501	260.446	323.136	324.66	374.674	425.674	389.016	404.262	452.339	449.715	387.265	457.688	417.755	386.121	372.043	329.704	450.041	258.596	436.931	329.14	377.721
CHPF_CTGCATTCTCGATGCCACCG	CHPF	467.636	381.536	376.317	573.051	523.449	394.116	391.998	376.998	408.188	394.092	450.429	471.859	456.314	482.373	435.291	488.009	487.36	417.265	564.452	352.574	505.111	428.247	498.609	430.918	371.061	564.315	403.257	395.129	455.732	387.456
PNPLA3_GGCATTTGCAGAGACCCTGT	PNPLA3	286.798	226.577	235.487	305.183	342.689	363.538	238.325	243.716	382.6	358.031	288.988	324.488	259.472	242.704	218.691	232.768	259.776	229.798	323.109	310.803	326.447	335.73	269.169	266.819	191.849	261.701	165.143	248.822	193.341	202.49
TRAM1L1_GTAAAACAGGCCGCACATGT	TRAM1L1	169.536	230.484	184.696	153.258	209.003	163.082	144.558	170.093	221.762	264.016	165.009	182.524	239.021	262.423	195.275	183.004	116.787	168.115	178.699	187.615	174.804	150.697	119.63	174.121	159.108	203.859	126.738	284.652	128.894	164.523
BAGE2_ACTGAAATCCTGAAAGGTGT	BAGE2	330.595	444.04	386.706	434.453	401.06	450.175	368.557	407.462	341.172	412.122	446.861	462.395	452.479	512.711	468.325	355.84	461.158	432.988	478.07	435.408	476.437	414.894	463.791	412.128	542.806	486.017	444.223	411.053	440.771	526.668
TMEM170A_TCTGTAAGCATCCTGTTGAT	TMEM170A	399.822	464.874	477.9	414.463	425.537	494.343	368.557	357.957	525.162	538.334	443.293	427.242	488.268	527.88	570.771	546.87	440.945	445.082	619.842	863.736	575.694	715.335	391.031	468.499	427.926	462.739	450.624	633.002	346.402	455.602
CDT1_GCCCCGGCCTCCGCTACCAG	CDT1	300.926	380.233	390.169	315.845	493.322	506.235	459.719	326.224	226.636	200.909	181.063	162.244	205.788	236.636	199.874	246.68	201.382	191.095	95.6139	43.1868	57.9003	72.4873	245.51	288.114	246.417	301.203	189.467	119.434	162.268	107.086
DEFB125_GACGATGTTTAGATACTGAA	DEFB125	152.582	148.447	181.233	149.26	175.111	147.793	177.116	159.938	162.057	133.94	249.743	212.269	178.947	198.714	199.456	176.047	201.382	240.683	160.895	168.499	179.215	100.147	204.89	150.32	227.462	183.402	262.437	248.822	157.665	130.45
SNAP29_CAGGAGCTCGCCCGTCAGCG	SNAP29	138.454	98.9649	106.2	159.921	126.155	115.517	130.232	106.626	180.334	136.515	126.655	90.5861	134.21	104.666	145.515	112.906	123.524	114.899	230.792	146.552	216.161	200.294	172.75	144.057	201.039	132.614	121.617	51.7549	121.989	108.059
ZNF512_TGGAAAACCATATAGGTCGA	ZNF512	282.56	303.405	236.641	145.262	203.354	265.009	248.743	251.332	263.19	171.288	290.772	240.662	177.668	209.332	218.273	212.969	218.601	234.636	368.608	623.023	458.791	613.28	231.226	266.819	252.735	324.481	225.312	300.577	273.9	213.198
CCDC7_AGACAACATGACTTTCACGG	CCDC7	983.307	1043.04	862.297	796.941	866.138	829.002	746.229	783.19	784.697	842.274	859.828	863.948	825.71	829.743	701.233	688.136	759.114	798.245	818.323	885.683	817.221	742.041	870.892	891.901	897.209	794.274	642.651	863.909	919.52	836.244
Non-Targeting_CCTAAACTCAGACGCACTAC	Non-Targeting	370.153	328.147	407.485	406.467	440.601	351.646	444.091	383.344	380.164	408.258	585.111	612.47	448.644	603.725	486.305	514.764	532.278	593.846	600.06	519.657	554.74	566.545	474.504	481.025	396.335	483.195	565.84	554.375	697.408	475.072
ATP11C_TTTACTCCTAGGATGGGTAT	ATP11C	340.484	273.456	286.278	267.868	376.582	310.876	317.766	387.152	503.229	415.986	428.13	365.049	430.75	348.886	527.284	477.843	571.207	445.082	325.747	367.442	359.533	309.025	424.063	407.118	374.507	372.448	431.421	431.954	438.469	400.112
KLHL28_TTGTGGAGTATGCCTATACA	KLHL28	211.92	231.786	262.037	145.262	180.759	251.419	152.371	129.474	220.544	185.455	133.791	166.3	112.481	182.028	212.837	149.292	171.437	146.345	225.517	334.167	328.653	376.743	145.967	184.142	187.828	245.477	93.4532	138.345	153.062	164.523
GLUD2_GAAGACTTCAAATTGCAACA	GLUD2	511.433	501.335	528.691	383.811	529.097	460.368	423.254	422.694	492.263	552.501	596.707	459.691	568.794	511.194	601.714	494.966	593.666	575.704	588.19	527.445	621.463	670.507	475.397	443.445	479.048	465.56	550.478	670.823	624.905	574.37
NAPA_TTGACATCTACGAACAGGTG	NAPA	487.415	472.687	500.987	594.374	465.079	572.487	596.463	557.246	305.837	296.213	143.602	186.58	140.601	171.409	234.581	199.592	202.131	231.007	81.107	29.7352	23.7116	17.168	285.238	195.417	225.738	245.477	71.6901	77.6324	90.9162	134.344
SNN_TGGGCTGCTGGTGCTACCTG	SNN	257.129	313.823	243.567	190.573	227.832	231.033	290.417	198.019	173.023	203.485	239.039	182.524	256.916	191.129	258.833	242.934	232.825	212.865	265.081	300.184	256.416	303.302	195.515	196.669	246.991	219.378	209.95	228.916	237.073	297.894
C2orf73_TTTCTATAAAGGGTGACTGG	C2orf73	336.246	268.247	364.774	354.492	318.212	332.96	384.184	305.914	280.249	288.485	317.53	348.824	304.209	374.674	436.128	321.059	330.147	407.589	328.384	264.077	308.802	285.18	421.385	369.538	290.071	419.709	380.214	310.529	382.078	361.172
DHX9_TGGATGTGGGAAAACCACAC	DHX9	29.6688	45.5759	48.4826	39.9803	77.1993	73.0473	70.3253	71.0837	63.3606	54.091	32.1098	68.9536	15.3383	51.5745	23.4163	66.8873	40.4262	52.0069	27.0357	50.2666	19.8515	17.168	33.9251	37.5801	60.8862	55.0207	5.12072	5.97172	19.5643	51.5959
ARMC10_ATACATCAGTCAAGTATGTG	ARMC10	339.072	319.032	271.272	259.872	340.807	270.105	216.185	291.951	327.769	365.758	306.827	354.232	398.795	435.349	384.277	335.506	333.142	367.677	447.077	402.133	336.925	312.84	340.143	367.032	320.514	313.9	350.769	390.152	311.877	280.37
RPL35_TCTTCGCGGGAAGAAGAAGG	RPL35	307.99	169.282	279.352	327.839	395.411	436.585	362.045	396.038	230.291	208.637	235.472	154.132	198.119	191.129	198.62	233.838	240.311	203.19	137.157	96.9933	114.146	93.4704	184.356	175.374	147.62	126.971	113.936	117.444	186.436	125.583
MYO3A_TCCCACTGTGTGGTCACTAG	MYO3A	548.166	437.529	540.234	489.093	433.069	426.392	455.812	489.97	396.004	394.092	502.161	409.666	398.795	444.451	433.201	468.746	468.644	491.042	408.832	583.376	464.857	533.163	488.789	484.783	480.197	591.12	393.015	371.242	540.894	469.231
ROPN1L_CATCCTGAAGCAATTCACCA	ROPN1L	351.787	364.607	399.404	430.455	434.952	484.151	475.347	360.496	360.668	428.864	421.887	348.824	291.427	357.988	387.623	366.542	363.087	453.548	238.046	321.423	361.739	336.684	501.734	410.876	455.497	416.183	364.851	450.865	395.888	282.317
GPATCH8_ATGCTGAAGATGCTACCGAA	GPATCH8	240.176	264.34	296.667	234.551	274.905	332.96	190.139	241.177	299.744	303.94	247.067	417.778	232.63	376.191	212.001	305.006	245.552	342.278	254.531	382.309	142.269	330.962	316.932	364.527	272.265	403.485	211.23	488.686	264.693	341.701
KCNK9_CACGGCGTAGAACATGCAGA	KCNK9	437.967	442.738	400.558	501.087	380.348	419.597	476.649	500.125	393.567	463.637	429.022	474.563	515.11	505.127	441.564	501.387	521.797	459.596	526.866	530.277	401.442	395.819	410.225	414.634	391.165	479.668	462.145	443.898	367.117	475.072
DRGX_GGGGAGTTGATGTTTCTCAC	DRGX	300.926	360.701	360.156	325.173	448.132	390.718	427.161	412.54	394.785	452.046	358.559	362.345	375.788	394.393	346.644	388.481	354.103	345.906	468.838	312.927	286.193	287.088	410.225	390.833	412.992	388.672	412.218	461.813	351.006	471.178
CXorf21_TCCAATAGGATGAGTACCGC	CXorf21	156.821	152.354	155.837	202.567	163.813	142.697	130.232	104.087	116.973	141.667	128.439	150.076	126.541	188.095	136.734	195.311	148.229	163.277	137.816	113.277	114.698	136.39	151.324	154.078	147.62	129.793	209.95	173.18	113.933	160.629
THAP8_GGTGTATTCTTCTGTAGGGG	THAP8	264.193	235.693	175.461	189.24	239.129	207.25	192.743	181.517	179.116	148.106	159.657	186.58	242.856	141.071	145.515	180.863	170.688	118.527	265.741	201.774	222.227	137.344	208.014	219.217	210.804	164.357	249.635	145.312	216.358	242.404
S100G_TGATCCAGACCAGTTGTCAA	S100G	558.055	481.803	615.267	483.762	527.215	462.067	411.533	525.512	612.892	607.88	541.406	686.832	577.742	580.972	847.167	633.021	559.229	627.711	683.145	693.113	500.148	681.952	609.758	667.673	657.111	647.552	737.384	741.489	630.659	601.628
HACE1_TACCTGCAAGCAAAGTACAA	HACE1	353.199	378.931	419.028	375.815	320.095	404.308	334.696	323.685	377.727	422.425	407.616	321.784	407.742	406.528	344.135	377.779	375.814	411.217	495.874	489.922	452.725	566.545	397.28	375.801	379.103	357.635	435.261	371.242	345.252	304.708
NLRC5_GGGACAAACCGTTCTCACTG	NLRC5	353.199	451.853	332.452	409.132	303.148	390.718	386.789	370.651	242.476	378.637	328.233	420.482	387.291	497.542	376.751	368.683	302.448	403.961	270.357	482.134	371.113	443.508	261.134	316.925	394.611	326.597	454.464	301.572	463.788	453.655
RPS5_CCCGGCGCGCCCAATGCGTG	RPS5	370.153	437.529	377.472	421.126	487.673	441.681	509.207	340.186	261.972	249.849	240.823	243.366	185.337	109.217	202.383	230.627	278.492	210.446	165.511	107.613	106.426	147.836	222.298	251.787	227.462	267.344	69.1298	46.7785	214.056	156.735
SH3D21_TTTGTGGAATTGCTGGACAG	SH3D21	138.454	153.656	101.583	107.947	122.389	90.035	98.9763	170.093	182.771	137.803	110.6	68.9536	134.21	107.7	79.8662	74.3786	128.765	99.1759	58.6872	25.4873	51.2831	21.9369	174.089	115.246	114.88	95.2282	107.535	161.236	86.3129	119.742
FGF1_AGAAGTTTAATCTGCCTCCA	FGF1	385.694	494.824	328.989	297.187	318.212	356.743	255.255	283.066	392.348	421.137	388.885	486.731	484.434	514.228	456.199	334.971	366.83	362.839	412.129	485.674	476.437	335.73	355.767	382.064	404.95	340	362.291	334.416	416.604	296.92
PDS5A_TGTACTCACGATCGTATCTG	PDS5A	144.105	158.865	167.38	154.591	192.057	163.082	140.651	156.13	144.998	86.2881	117.736	167.652	149.548	188.095	127.953	155.178	89.0873	140.298	169.467	120.357	116.903	125.899	123.648	108.982	170.596	104.398	58.8883	148.298	174.927	225.854
MYH15_TACACACATAGATCATCCAC	MYH15	202.03	209.649	176.615	235.884	163.813	176.672	226.604	184.056	175.46	157.122	139.142	156.836	77.9696	97.0814	191.512	162.135	180.421	140.298	87.701	118.941	86.0233	46.7352	112.488	160.342	147.046	131.909	186.906	171.189	220.961	159.655
MRPS27_AAGTGCATAGCCATACAACT	MRPS27	209.094	250.017	252.802	179.911	327.626	287.093	273.487	219.598	188.863	149.394	202.47	147.371	267.142	121.352	218.691	153.573	217.852	123.365	140.454	128.852	107.529	138.298	216.049	111.488	261.925	104.398	60.1685	29.8586	224.413	183.02
SYCE2_CCATGTGAAATGCAAAGACC	SYCE2	486.003	343.773	386.706	423.791	472.61	477.355	381.58	463.314	349.702	426.289	434.374	494.844	393.682	540.015	390.132	439.315	421.48	452.339	381.137	364.61	362.29	409.171	498.609	444.698	580.716	473.319	418.619	331.43	399.341	401.085
PIBF1_GAAAGTGGATTATCTTACAA	PIBF1	240.176	167.98	182.387	77.2953	220.3	183.468	182.325	223.406	282.686	184.167	197.118	214.973	189.172	192.646	218.273	212.969	247.798	172.953	123.968	111.861	122.969	117.315	220.513	250.534	201.039	201.037	212.51	300.577	239.374	308.602
MYCBP_CGAAGCGTGAGCAGTTCCGG	MYCBP	42.3839	41.6694	46.1739	45.311	84.7309	67.951	76.8369	86.316	38.9911	60.5304	39.2453	41.913	23.0074	68.2604	62.7221	40.1324	51.6557	58.0542	42.8614	50.2666	15.4401	38.1512	58.0297	65.1388	82.1389	63.4855	19.2027	16.9199	34.5252	17.5231
PIGY_TGTGGAAGAAAACTTCCCAC	PIGY	59.3375	32.5542	60.0261	58.6378	101.677	96.8301	122.418	74.8918	91.3855	81.1365	74.9228	82.4739	66.4658	53.0914	56.0318	63.1416	56.8961	54.4258	127.925	168.499	158.812	212.693	66.9574	90.1922	71.2253	67.7178	94.7334	70.6654	73.6537	84.6952
BRI3BP_CTGGGACAGGTTGGAGACTG	BRI3BP	165.297	246.11	170.843	99.9508	131.804	178.371	123.72	119.319	153.528	173.864	103.465	137.907	89.4733	113.767	151.369	155.714	130.262	183.838	199.141	221.598	245.938	268.012	178.107	194.164	198.742	148.133	124.178	155.265	101.274	221.96
SOD1_GGAAAGTAATGGACCAGTGA	SOD1	170.949	131.519	118.898	129.27	176.993	125.709	114.604	109.164	207.14	127.5	148.062	140.611	117.593	125.902	120.008	89.3614	118.284	102.804	114.737	85.6656	154.952	58.1806	117.845	116.498	162.555	123.444	84.4919	50.7596	155.363	147
TP53BP2_TCTGGCTTAATGTCTGAAGG	TP53BP2	459.159	395.859	427.108	466.437	444.367	377.128	414.138	474.738	397.222	363.183	300.583	347.472	393.682	338.268	412.293	341.393	299.453	370.096	441.143	511.87	548.674	460.676	413.35	367.032	415.864	372.448	307.243	314.511	315.33	404.979
SCN4A_CGTGTCATTGCTGTACCACG	SCN4A	326.356	407.579	368.237	369.152	404.825	450.175	487.068	369.382	502.011	463.637	434.374	315.023	351.502	408.045	384.696	466.07	332.393	372.514	354.101	430.452	451.622	278.504	452.185	433.424	455.497	397.842	346.929	422.002	405.095	403.032
CLCN7_CGGGGTGAAGATCCCCCACG	CLCN7	169.536	171.886	109.663	138.598	109.209	159.685	104.186	115.511	135.25	176.44	155.197	143.315	144.435	159.274	162.659	173.372	165.448	122.156	120.671	144.428	165.429	180.264	158.912	127.772	160.257	151.66	204.829	231.902	126.592	130.45
ECSCR_TGGTCAGACTTAGACCGCCA	ECSCR	713.463	765.676	644.126	771.62	775.758	667.618	649.858	665.141	643.354	616.895	615.437	684.128	509.998	681.087	638.929	582.187	625.857	717.211	549.945	702.316	710.244	803.082	607.973	824.257	666.876	821.784	522.314	490.676	597.285	553.926
CRCT1_GGGGCCCTGGGACGACCCCT	CRCT1	553.817	628.948	534.463	555.727	566.756	582.679	528.742	516.626	521.506	534.471	568.165	580.022	520.223	624.962	601.714	608.942	603.398	697.86	579.618	838.249	665.026	691.49	626.721	551.175	623.222	571.369	681.056	666.842	667.486	682.429
KCND3_AGTCACGTAGTAGAAGACCA	KCND3	395.583	394.557	422.491	402.469	410.474	419.597	433.673	310.991	431.339	378.637	420.995	388.033	465.261	301.863	473.343	450.553	469.393	517.65	380.477	350.45	419.088	394.865	420.492	508.584	475.601	439.461	345.649	519.54	378.626	309.576
POLM_CTGCTGCAGGGCATCTACAT	POLM	226.048	253.923	237.796	285.193	216.535	256.515	283.906	288.143	201.048	252.425	323.774	289.335	279.923	276.075	312.774	362.796	271.005	299.947	377.18	492.046	313.213	351.945	308.897	319.431	302.133	312.49	305.963	286.643	223.263	304.708
PLA2G2F_GTAGCAACCGTAGCCCACGA	PLA2G2F	207.681	158.865	181.233	178.579	152.516	163.082	222.697	205.635	162.057	158.409	179.28	144.667	184.059	239.67	246.707	169.091	202.88	139.088	170.127	340.538	146.129	306.163	112.935	179.132	156.236	204.564	224.032	249.817	206	213.198
DPP10_ATGAGATGACATCAGATACG	DPP10	522.735	583.372	528.691	510.416	596.882	587.776	557.393	520.434	608.018	593.713	686.792	596.246	630.147	540.015	704.997	704.189	694.732	638.596	606.654	540.897	492.98	635.217	495.931	529.879	491.11	508.589	642.651	844.003	660.581	685.35
OR4A5_GAAATACATTGGGGAACCCA	OR4A5	529.799	606.811	624.502	466.437	450.015	530.017	593.858	507.741	539.783	475.228	400.48	363.697	343.833	291.244	347.48	370.288	387.043	397.913	450.374	439.656	441.145	383.419	370.051	417.139	321.663	331.535	281.64	273.704	472.995	375.774
EML2_AAAGTACACTATCTCCCCGG	EML2	579.247	524.774	425.954	339.833	540.395	455.271	476.649	402.385	488.608	399.243	304.151	329.896	371.953	398.944	366.715	362.261	374.317	445.082	480.707	587.624	358.43	725.826	516.018	484.783	616.903	526.929	427.58	400.105	319.933	300.814
UQCR10_TGACGCCCACGATGATGGTG	UQCR10	714.876	720.1	679.91	764.957	762.578	800.123	566.509	533.128	533.691	349.016	499.485	434.002	521.501	354.954	402.258	360.656	396.776	338.65	374.543	174.163	226.638	139.252	320.503	326.947	391.739	301.203	257.316	381.195	507.52	498.436
RBSN_GAGTGCGCACTTCATCCATG	RBSN	281.147	174.491	244.722	277.197	186.408	239.527	212.278	242.446	235.165	244.697	217.633	236.606	194.285	201.747	334.518	246.145	296.459	227.379	128.584	173.455	136.204	217.462	169.179	268.071	202.188	227.137	337.968	182.137	265.844	232.668
COG2_TTCCCAGGATTAAAAAGCGA	COG2	339.072	272.153	341.687	146.595	338.924	307.478	251.348	310.991	243.695	212.5	196.226	224.437	239.021	156.24	244.198	194.241	240.311	211.656	181.996	140.888	209.544	263.243	346.839	180.384	291.794	130.498	125.458	95.5475	276.201	346.569
CORO7_GGTTGAATCCAGTAGACACA	CORO7	313.641	414.09	392.478	313.179	402.943	487.548	418.045	417.617	511.759	431.44	419.211	420.482	557.291	445.968	458.29	374.569	448.431	412.427	460.925	543.021	472.025	555.1	454.417	362.022	356.127	433.112	565.84	579.257	464.939	430.291
CERK_ATGGAGGCTAAGGTGAACAG	CERK	586.311	705.776	632.582	738.303	578.053	647.233	666.788	925.358	765.201	951.744	728.713	688.184	663.38	709.908	760.61	835.288	742.644	741.401	871.735	1048.52	953.976	878.431	860.179	601.282	676.066	653.195	820.596	913.673	753.799	737.919
PALLD_TATGGGAAGGATGTTCACAG	PALLD	175.187	218.764	141.985	250.543	154.399	236.13	273.487	225.945	257.098	233.107	162.333	194.693	227.518	125.902	201.129	206.013	126.519	140.298	248.596	253.457	220.573	136.39	263.366	256.797	247.565	285.685	181.786	181.142	216.358	206.384
WFIKKN2_TCTTGGTCCCACATACGTTG	WFIKKN2	193.553	145.843	143.139	199.902	188.291	190.263	205.767	137.09	124.284	141.667	164.117	116.275	153.383	107.7	136.316	143.941	161.705	123.365	165.511	96.9933	147.232	74.3948	166.054	132.783	150.492	102.282	147.221	146.307	199.095	140.185
PCDHGB6_AAGCGATAGTCGTGTACCAG	PCDHGB6	672.492	699.265	759.56	595.707	572.404	682.907	562.602	651.178	806.629	780.456	643.979	663.848	550.9	479.34	589.588	569.879	640.83	570.866	646.218	819.841	758.218	822.158	711.087	843.047	689.277	639.792	705.38	716.606	677.844	598.708
CHN1_TACTGTGCCAACTTTATGTG	CHN1	569.358	558.631	618.73	679.666	579.936	613.257	638.137	701.952	656.757	642.653	701.063	688.184	741.35	761.482	618.858	704.724	757.617	642.225	793.925	637.89	606.575	561.776	720.908	666.42	686.405	760.415	629.849	653.903	662.883	625.966
PDE4A_CACAGTGCACCATGTTCCGG	PDE4A	233.112	205.743	187.004	207.898	244.778	237.828	195.348	200.558	221.762	200.909	214.065	279.871	158.495	276.075	254.652	194.241	200.634	223.751	152.323	134.516	129.586	99.1931	286.578	189.153	262.5	210.207	613.207	135.359	174.927	202.49
CLIC1_TGAGTGCCCCTATACCTGGG	CLIC1	459.159	463.572	451.35	430.455	450.015	424.694	377.673	319.877	358.231	374.773	492.35	454.283	392.404	473.272	347.062	357.445	300.202	364.048	393.006	431.868	463.202	528.394	503.073	554.933	502.024	519.17	442.943	374.228	449.978	580.211
CD40_TATCAGAAACCCCTGTAGCT	CD40	344.723	373.723	334.761	331.837	421.772	305.779	337.301	314.799	314.366	352.879	387.101	383.977	389.848	326.133	426.51	419.517	496.344	354.373	377.18	488.506	440.042	386.281	448.168	497.31	457.221	460.622	352.05	358.303	517.877	513.039
PSMB11_GCCATGATGTCTCAATACCG	PSMB11	179.425	170.584	211.246	333.169	197.705	249.72	160.185	191.672	227.854	121.061	168.576	164.948	186.616	222.984	183.567	153.573	143.738	194.723	224.858	281.776	345.196	330.008	270.954	280.598	206.783	210.913	153.622	201.048	172.626	200.543
HRNR_TCATCTAGGGGTGAACGACA	HRNR	463.398	609.415	512.53	510.416	500.854	567.391	540.463	582.633	472.767	473.94	523.568	517.828	455.035	421.697	427.765	562.923	472.388	493.461	441.143	373.814	278.473	357.667	502.627	491.047	529.595	450.041	491.589	541.436	571.967	538.35
GRK4_CTTTGTGACAAGCAACCGAT	GRK4	526.974	524.774	574.865	613.032	525.332	480.753	498.789	578.825	466.675	616.895	644.871	573.261	492.103	520.296	544.846	654.96	497.092	607.15	426.636	366.026	534.337	481.659	536.998	613.808	583.014	556.556	450.624	584.233	493.71	404.006
C22orf42_GGAATCTCACACTCATGGCA	C22orf42	613.154	777.395	668.367	880.9	672.198	676.112	681.113	747.649	584.867	685.153	561.921	631.399	599.471	732.661	626.385	683.32	621.366	634.968	597.422	683.909	634.698	708.658	721.8	700.242	774.288	677.178	650.332	603.144	684.749	756.416
RLN3_AGATGCTGATGAAGACAGTC	RLN3	534.038	453.155	497.524	477.099	466.961	555.499	497.486	481.085	623.858	587.274	458.456	425.89	593.08	688.671	468.325	435.57	509.819	512.812	362.014	387.265	295.016	370.066	503.519	557.438	492.259	478.963	798.833	633.002	601.889	684.376
PHOSPHO2_TAGATGACAATAGTGACACT	PHOSPHO2	175.187	217.462	148.911	161.254	216.535	154.588	139.348	242.446	160.838	168.712	198.01	191.989	288.871	198.714	208.237	208.688	187.907	125.784	110.121	137.348	95.3976	60.0881	209.353	211.701	209.081	133.319	202.269	165.218	208.302	157.708
PPM1B_TTACAAGTGTGTTGATGGCA	PPM1B	793.992	843.806	829.976	1031.49	903.796	924.133	918.136	888.547	1017.42	898.941	984.7	895.045	1083.9	1137.67	1083	1103.91	984.453	1055.86	844.699	1280.03	992.025	1343.88	901.692	1035.96	909.846	924.772	1220.01	1060.98	956.347	880.051
POLDIP3_CTCTCGCAAGCAGCAGACCA	POLDIP3	357.438	299.499	303.593	358.49	325.743	298.984	264.371	326.224	246.132	314.243	300.583	315.023	227.518	341.302	233.744	242.399	309.934	274.548	232.77	182.659	153.849	222.231	334.34	260.555	329.704	264.523	226.592	317.496	345.252	495.516
GULP1_AATTCTAGAACCCAAAACAA	GULP1	199.205	281.269	213.554	102.616	210.886	176.672	115.906	205.635	231.51	170	214.957	194.693	277.367	154.724	229.981	220.46	238.065	216.494	280.248	175.579	191.347	160.235	167.84	241.765	210.23	276.514	327.726	229.911	206	207.357
GNB4_GTCATCTAAAAAACGACAGC	GNB4	457.747	347.679	387.861	403.801	372.816	421.296	347.719	455.697	456.927	500.986	391.561	444.818	440.975	517.262	580.389	430.754	565.967	457.177	514.996	742.671	614.295	759.209	472.719	397.096	462.39	445.104	546.637	645.941	466.09	576.317
LAS1L_GTGACGACCATAAGTTGCAG	LAS1L	179.425	156.26	138.522	143.929	295.617	229.334	253.952	200.558	182.771	68.2577	52.6243	67.6016	88.1951	59.159	109.136	90.9667	129.514	48.3785	40.2238	5.66384	36.9459	19.0756	55.7978	41.3381	44.803	53.6099	0	0	121.989	46.7284
GADD45B_GCTCGTGGCGTGCGACAACG	GADD45B	600.439	494.824	484.826	690.327	551.692	570.788	550.881	526.781	459.364	609.168	429.022	465.099	547.065	615.86	644.783	624.994	610.136	603.522	474.113	392.221	417.985	500.734	534.766	632.598	539.934	543.859	769.389	662.861	621.453	658.092
FDX1_GCAGGCCGCTGGATCCAGCG	FDX1	0	0	1.15435	1.33268	0	0	0	0	266.846	180.303	242.607	264.998	140.601	289.727	125.444	131.634	161.705	165.696	134.519	231.51	235.461	160.235	174.536	154.078	200.465	198.921	143.38	209.01	243.978	214.172
XIAP_TATCAGACACCATATACCCG	XIAP	419.601	289.082	263.191	242.547	288.085	314.273	226.604	313.53	319.24	361.895	297.907	258.238	435.863	283.66	322.81	288.953	318.169	295.109	395.644	266.201	481.4	356.714	314.7	358.264	342.341	266.639	281.64	348.35	354.458	264.794
RBM12_AAATGATACTAAATCCAGAG	RBM12	388.519	329.449	419.028	273.199	355.87	349.947	293.022	345.264	454.49	324.546	399.588	452.931	320.826	386.809	312.356	323.734	322.661	353.163	420.701	511.87	434.528	416.802	368.712	352	434.819	366.805	295.722	401.101	345.252	386.483
AMPD2_GAGACCCGGACCTATGAACA	AMPD2	159.646	98.9649	102.737	114.61	126.155	140.998	115.906	111.703	109.663	115.909	136.467	121.683	85.6387	75.8449	97.0102	94.1772	116.038	114.899	76.4911	32.5671	35.2916	18.1218	130.344	111.488	99.3708	148.838	157.462	137.35	74.8045	101.245
PCDH19_TGGCGCTTTAGACTACGAAG	PCDH19	101.721	174.491	102.737	121.274	141.218	157.986	138.046	139.629	173.023	136.515	143.602	106.811	74.135	130.453	110.809	112.371	137	96.757	184.634	143.72	206.787	159.281	124.094	170.363	153.939	170	97.2937	155.265	142.704	144.079
MSX2_ATTCAGAAGATGGAGCGGCG	MSX2	680.969	725.308	662.595	642.351	610.062	730.473	539.16	690.528	576.338	728.941	673.413	608.414	579.02	609.793	666.109	637.302	714.945	656.738	697.652	674.705	623.118	846.003	703.499	740.328	622.647	670.83	695.138	770.352	788.324	687.297
GSTM3_TGTGAAATTCAAGCTAGACC	GSTM3	332.008	362.003	361.311	422.459	297.5	363.538	333.394	310.991	303.4	321.97	365.695	328.544	346.389	285.177	323.228	343.533	350.36	354.373	339.594	425.496	403.096	405.356	291.041	234.249	348.085	330.83	299.562	298.586	279.654	341.701
RPS29_CGTGTCTGTTCAAACCGGCA	RPS29	161.059	170.584	208.937	166.585	229.715	273.503	191.441	168.824	77.9823	63.1062	82.0583	67.6016	81.8041	39.4393	61.4677	77.5892	109.3	59.2637	69.2377	57.3464	85.4719	21.9369	52.6731	50.1068	78.6925	50.083	1.28018	6.96701	28.771	9.73508
ZBTB21_CTGATCATTAAGTTAAGGCG	ZBTB21	247.24	316.427	225.098	293.189	312.563	341.454	234.418	266.564	246.132	368.334	215.849	169.004	152.105	195.68	178.967	227.417	168.442	215.284	271.675	244.253	259.173	281.365	274.972	217.965	297.538	260.29	262.437	248.822	219.81	222.933
RAB3IP_CCGGTAGATGACACTTGGTG	RAB3IP	508.607	549.515	524.074	571.719	540.395	501.138	580.835	522.973	499.574	418.561	635.952	532.701	457.592	482.373	517.248	510.483	502.333	660.367	475.432	475.055	539.851	634.263	591.903	626.335	553.145	619.336	508.232	480.723	472.995	386.483
ATP7B_CTCACCAAGGGTCACAACGG	ATP7B	161.059	148.447	176.615	262.537	173.228	197.058	226.604	220.867	131.595	270.455	141.818	164.948	178.947	159.274	156.805	330.691	256.781	226.17	332.341	220.89	133.446	146.882	126.773	126.52	178.638	248.299	229.152	241.855	148.458	214.172
FYTTD1_TCGTCCACCTCTAAGTGACA	FYTTD1	512.846	544.307	638.354	614.364	636.423	547.005	714.974	679.103	588.522	691.592	819.691	608.414	600.749	538.499	587.079	679.574	622.863	627.711	816.345	720.016	1006.91	719.15	634.309	678.947	625.519	589.004	668.254	807.178	639.866	692.164
TMCO6_GCTCTGGTCAGCCTTCGTCG	TMCO6	226.048	144.541	208.937	271.866	241.012	263.31	268.278	220.867	188.863	211.213	221.201	270.406	198.119	224.501	179.803	181.933	193.147	239.474	139.794	115.401	188.59	127.806	216.942	240.513	220.569	225.021	193.307	262.756	219.81	242.404
IRF3_GAGGTGACAGCCTTCTACCG	IRF3	433.729	294.29	417.874	373.15	487.673	490.946	479.254	421.425	445.961	437.88	357.667	398.849	423.081	335.234	401.003	409.885	365.333	526.116	551.923	511.162	572.386	578.944	519.143	467.246	472.155	459.212	521.034	373.233	403.944	428.344
B3GALT6_TACCTGCCCTACGCGCTGGG	B3GALT6	351.787	417.996	354.385	551.729	306.914	361.839	296.929	262.756	299.744	448.183	309.503	329.896	343.833	336.751	258.415	323.734	316.672	379.771	238.046	279.652	180.318	342.407	302.201	354.506	291.22	342.116	409.658	541.436	378.626	347.542
TOR3A_GCTGGTCCTAAGAACAGTGA	TOR3A	234.524	231.786	240.104	150.593	256.076	159.685	144.558	195.48	155.965	149.394	167.684	181.172	182.781	175.96	199.456	195.846	193.147	164.487	249.256	217.35	255.313	266.105	243.278	214.207	156.811	200.332	145.941	139.34	177.229	132.397
RTL1_TTCCTTCGGGTTAAACACGT	RTL1	250.065	174.491	206.628	243.88	231.598	139.299	165.395	168.824	213.233	243.41	234.58	187.932	200.676	200.23	192.348	172.302	268.011	187.467	172.764	194.695	259.173	344.314	206.675	235.502	235.503	193.278	220.191	267.732	180.682	183.02
RRAS2_AGTTTACTTACTATCTAGCC	RRAS2	635.759	457.061	540.234	425.124	442.484	514.729	438.882	406.193	556.842	596.289	511.972	570.557	513.832	506.644	584.57	670.478	543.508	579.333	642.921	930.286	745.535	860.309	572.709	620.072	548.55	615.104	764.268	672.814	510.972	597.734
MAPKAP1_TGCTGGCAGTATACAAGCGA	MAPKAP1	370.153	362.003	412.102	254.541	389.762	456.97	446.696	360.496	525.162	397.955	469.159	388.033	400.073	306.413	466.652	362.796	512.065	371.305	317.834	261.953	355.122	209.832	412.904	276.84	490.536	266.639	354.61	173.18	470.693	311.523
KIAA1109_GCGGCATGTTCCATATTCGG	KIAA1109	264.193	300.801	311.674	318.51	306.914	305.779	341.208	359.227	238.821	282.046	309.503	316.375	452.479	477.823	298.557	374.569	360.841	316.879	354.761	381.601	428.462	344.314	279.882	414.634	273.413	450.041	345.649	264.746	356.76	291.079
AP1G1_ATAGCACGCAATTCGTACAG	AP1G1	310.816	214.858	270.117	170.583	350.221	275.201	339.906	333.84	249.787	206.061	281.852	256.886	259.472	247.254	351.244	269.689	292.716	318.089	302.667	172.039	275.716	168.819	258.455	194.164	270.541	246.888	501.831	251.808	214.056	168.417
ELANE_CCGGCCCCCCACAATCTCCG	ELANE	327.769	368.514	349.767	269.201	295.617	363.538	320.371	326.224	333.862	355.455	277.393	297.447	410.299	408.045	245.034	276.646	291.967	312.041	373.224	479.303	313.765	475.936	327.198	398.349	376.231	361.162	393.015	389.157	326.838	276.476
SEC11C_ATGGAGCCGGCCTTTCACAG	SEC11C	286.798	312.521	364.774	281.195	286.202	295.587	312.557	328.762	313.148	264.016	303.259	269.054	366.84	453.552	370.479	405.604	405.759	414.846	346.848	266.201	261.93	250.844	355.32	379.559	301.559	328.008	327.726	353.327	334.894	293.999
GPR160_TAAGATAGTTTCATTCATAT	GPR160	159.646	165.376	191.622	41.313	197.705	164.781	105.488	218.329	168.149	176.44	231.904	236.606	268.42	297.312	229.563	197.451	208.869	267.291	181.996	308.679	231.05	288.041	230.333	232.997	178.063	280.747	227.872	185.123	197.944	235.589
PTS_TGTGGTGACAGTACATGGAG	PTS	190.728	162.771	115.435	131.935	88.4967	127.408	104.186	126.935	118.192	115.909	74.0309	118.979	111.202	124.386	104.119	82.9402	110.049	131.831	131.881	104.781	103.669	112.546	116.952	85.1816	94.2012	116.39	79.3712	108.486	170.324	48.6754
SRGAP2B_GGCCAAGACATGCAGCACCA	SRGAP2B	375.804	368.514	452.504	503.752	380.348	470.56	384.184	445.543	332.643	350.304	321.99	371.809	412.855	414.113	328.664	395.437	339.131	374.933	400.26	449.567	298.876	441.6	341.036	459.73	478.473	314.606	400.697	304.558	386.682	296.92
GPLD1_GTGCCAGTCAAAGATCTACT	GPLD1	200.617	244.808	244.722	251.876	209.003	224.238	261.766	229.753	237.602	216.364	313.07	264.998	314.435	391.359	383.859	306.076	256.781	321.717	367.949	445.32	341.888	413.94	342.822	311.915	361.296	309.668	281.64	203.038	257.788	312.496
AKAP10_ACTGGCTACTGTAAGTGTAG	AKAP10	470.462	492.22	464.048	369.152	472.61	382.224	412.835	446.812	550.75	472.652	540.515	451.579	359.171	430.799	409.784	423.798	448.431	447.501	481.367	531.693	438.388	443.508	421.831	509.837	399.207	500.83	527.434	515.559	439.62	495.516
E2F7_GAACATTGGCTATGTCATAG	E2F7	678.143	712.287	597.952	595.707	664.667	704.991	668.09	594.057	590.959	719.926	500.377	561.093	640.373	753.898	668.618	748.067	700.721	678.509	549.285	540.897	527.168	500.734	678.055	744.086	632.986	634.149	563.279	505.606	618	658.092
NLRP5_CTGCGTATGAGGGTGAACGG	NLRP5	132.803	225.275	206.628	199.902	212.769	156.287	226.604	196.75	220.544	164.849	214.065	204.157	177.668	197.197	169.768	283.067	180.421	241.893	228.155	271.864	237.667	207.924	194.176	200.427	195.87	192.573	139.54	175.17	157.665	174.258
RPS17_AGCTCCGCAACAAGATAGCA	RPS17	288.211	167.98	232.024	210.563	254.193	195.359	289.115	267.833	131.595	104.318	69.5712	102.754	71.5786	51.5745	103.701	96.8527	104.809	58.0542	29.6733	13.4516	21.5058	26.7058	69.6357	105.224	74.6717	77.5933	16.6423	12.9387	54.0894	16.5496
TMPRSS13_GATGATGAGCGAAACCACCA	TMPRSS13	642.823	585.976	625.656	550.396	572.404	579.282	548.277	568.67	439.869	534.471	610.978	569.205	612.253	567.32	490.905	488.009	473.136	515.231	555.22	545.853	551.431	578.944	572.262	630.093	650.793	677.884	682.336	742.484	604.19	655.171
NDUFA3_GCCACGCCCTACAACTACCC	NDUFA3	235.937	315.125	283.969	282.528	237.247	292.189	253.952	253.87	241.258	239.546	216.741	170.356	260.751	232.085	226.218	257.917	290.47	286.643	372.565	269.74	446.108	300.441	183.91	251.787	244.693	171.411	122.897	133.368	232.469	191.781
CD200_TTGTAGTGAAGGGATACTAT	CD200	339.072	346.377	359.002	247.878	350.221	383.923	332.092	304.645	322.895	323.258	389.777	423.186	383.457	398.944	469.161	493.895	461.158	469.271	425.317	259.121	403.096	202.201	311.575	434.676	388.293	346.348	455.744	398.115	324.536	393.297
AGPAT3_CACTCACCCACATGTACTCG	AGPAT3	357.438	352.888	324.372	454.443	453.781	458.669	445.393	399.846	353.357	296.213	310.394	258.238	320.826	300.346	330.755	299.12	318.169	272.129	332.341	261.953	265.79	306.163	441.026	355.758	383.698	391.494	400.697	375.223	385.531	321.258
MRGPRX2_TTGATTTCATCACTGCAGCG	MRGPRX2	529.799	608.113	550.624	589.044	583.702	497.741	540.463	486.162	520.288	531.895	527.135	520.532	587.967	600.691	567.008	551.151	561.475	551.515	706.224	769.574	683.224	801.175	644.576	503.573	448.605	489.543	658.013	457.832	618	606.496
FBXO16_CTTTACAACCAAGCTTCCAA	FBXO16	566.532	567.746	567.939	459.774	553.575	518.126	510.509	609.289	566.59	546.062	542.298	569.205	552.178	624.962	587.079	606.801	542.01	556.353	735.238	737.007	679.364	629.495	624.935	612.556	666.876	775.933	582.482	527.502	658.28	544.191
SF3B3_TGAGCCGGATCTCAGTAACC	SF3B3	163.885	97.6627	175.461	122.606	158.164	224.238	141.953	135.821	103.57	131.364	52.6243	51.3772	56.2403	51.5745	59.7951	40.1324	59.8907	37.4933	21.7604	23.3633	0.551431	3.81512	72.7603	56.3701	58.0142	71.9502	35.8451	44.7879	28.771	15.5761
LONP2_GTACAATCTGGAAACGGCAT	LONP2	97.4831	100.267	86.576	102.616	107.326	147.793	141.953	217.059	169.368	142.955	146.278	158.188	93.3078	103.149	100.774	105.949	134.754	124.575	23.0792	96.2853	63.966	92.5166	162.037	121.509	129.814	146.017	190.747	210.005	170.324	136.291
KLHL22_CTTCGTATACTTGATTGGAG	KLHL22	114.437	160.167	114.28	63.9685	161.93	135.902	140.651	123.127	102.352	59.2425	66.0034	83.826	17.8947	48.5407	82.375	51.3694	48.6612	43.5407	71.8753	46.7267	39.7031	32.4285	107.132	66.3915	132.686	85.3527	34.5649	53.7455	63.2961	58.4105
BICD2_GACGTCGCCGGCGAGACACA	BICD2	180.838	177.095	222.789	201.234	152.516	152.89	210.976	158.669	157.183	170	181.955	224.437	162.33	138.038	185.239	204.943	186.41	209.237	187.931	189.031	247.041	187.895	203.104	135.288	170.022	146.722	222.751	192.09	203.698	176.205
RABL6_CGTGTACAAGAACTGCAACG	RABL6	291.036	261.736	375.163	271.866	252.31	195.359	216.185	297.028	226.636	285.91	313.07	210.917	230.074	263.94	297.303	300.19	248.546	240.683	523.569	485.674	594.443	343.361	303.986	328.2	260.202	294.855	290.601	388.162	278.503	403.032
FGF22_GGAACCCCGAGCGCGTCGCG	FGF22	175.187	92.454	210.091	174.581	190.174	125.709	203.162	116.78	208.359	162.273	107.033	86.53	184.059	180.511	147.606	123.608	116.038	156.021	85.7228	70.798	100.361	137.344	129.005	110.235	167.15	80.4149	158.742	181.142	146.156	152.841
CCDC68_AAATCACAAACTAGATGCAA	CCDC68	401.235	356.794	410.948	385.144	534.746	468.862	412.835	549.63	398.441	526.743	413.859	459.691	516.389	449.002	478.779	523.861	612.382	561.191	416.085	343.37	472.577	416.802	638.773	558.691	578.419	541.037	494.15	535.464	580.023	726.237
LMF2_CACAGCGATCTCAATTAGGA	LMF2	508.607	470.083	473.282	482.429	506.503	550.403	510.509	530.589	516.633	517.728	535.163	439.41	603.305	609.793	530.629	552.221	476.879	469.271	546.648	539.481	686.532	472.121	436.116	420.897	388.293	451.452	495.43	493.662	493.71	624.019
TMED4_GTCTGCACTCCAATTCTACC	TMED4	279.734	190.117	202.011	298.52	248.544	273.503	252.65	323.685	249.787	255.001	379.966	386.681	278.645	330.684	252.143	262.198	252.289	263.663	186.612	137.348	210.095	146.882	224.53	263.061	198.742	219.378	289.321	312.52	227.866	273.556
ADGRL1_AGCCGGCAAGAACTACAACA	ADGRL1	286.798	188.815	257.419	187.908	224.066	273.503	260.464	297.028	281.467	392.804	273.825	236.606	201.954	233.602	223.709	236.513	209.617	289.062	350.804	528.861	401.442	515.041	216.049	234.249	267.669	253.236	344.369	370.247	306.123	302.761
TP73_GGGCGGAACGGATTCCAGCA	TP73	402.647	563.839	477.9	477.099	385.996	416.2	454.51	484.893	367.979	431.44	483.43	532.701	457.592	573.387	588.333	523.861	512.814	533.373	372.565	367.442	403.096	222.231	439.687	457.225	372.21	493.776	509.512	517.549	460.335	575.343
BEAN1_GAATGTGGGGTAGAAGTAGC	BEAN1	508.607	440.133	354.385	401.136	357.753	416.2	407.626	488.701	436.213	540.91	366.587	458.339	421.802	503.61	501.777	472.492	492.601	530.954	300.03	443.196	305.493	360.529	357.999	464.741	435.394	356.929	426.3	600.158	583.475	622.072
C7orf72_GAGTAAAACACTGTGAGATG	C7orf72	500.13	546.911	380.935	499.754	453.781	448.476	479.254	559.784	514.196	431.44	421.887	540.813	384.735	509.677	464.562	561.853	475.382	514.022	344.21	441.072	407.508	515.995	372.729	496.057	466.411	521.992	400.697	566.318	384.38	590.919
LDB3_GACCCCGCTCTGGACACGAA	LDB3	504.369	513.055	507.913	498.421	596.882	565.692	639.439	674.026	599.489	589.85	593.139	559.741	434.584	547.6	563.245	544.195	482.868	545.468	595.444	791.522	564.114	738.225	472.719	536.143	530.744	510	800.113	670.823	543.196	563.661
ZSWIM7_AGCACTGAGAATGCAAATGC	ZSWIM7	765.737	500.033	659.132	746.299	723.037	647.233	666.788	703.221	856.586	669.698	765.283	819.331	835.936	849.462	671.127	864.183	707.458	670.042	760.295	756.831	725.132	673.368	624.489	672.684	757.056	697.635	786.031	890.782	764.157	843.058
NBPF14_TCTAGAAAATGACGAAGATG	NBPF14	307.99	395.859	348.613	323.841	346.455	332.96	371.161	286.874	321.677	305.228	301.475	282.575	292.705	191.129	300.23	240.259	315.923	276.967	286.182	276.82	317.073	326.193	457.542	319.431	402.653	363.983	230.433	228.916	315.33	234.615
TESPA1_GGACCAACAAGACTAGTTCA	TESPA1	370.153	380.233	487.135	374.482	448.132	424.694	483.161	439.196	603.144	499.698	469.159	482.675	400.073	465.687	537.738	490.685	506.076	578.123	437.846	524.613	433.425	446.369	496.824	569.965	518.107	480.373	523.594	606.13	522.481	653.224
SPTBN1_ACTGTGTGGAATACTCATCG	SPTBN1	680.969	744.841	699.534	786.28	606.297	601.366	622.509	665.141	615.329	717.35	759.039	758.49	553.456	850.979	724.649	791.945	782.322	717.211	559.836	639.306	428.462	682.906	625.382	620.072	604.841	838.714	888.445	759.404	540.894	680.482
CYP2C19_AGCAATCAATAAAGTCCCGA	CYP2C19	200.617	225.275	212.4	138.598	197.705	287.093	240.929	244.985	272.938	188.031	164.117	151.428	242.856	219.95	237.926	313.032	223.093	239.474	158.258	211.686	192.45	247.983	208.014	225.481	238.95	195.394	199.708	264.746	327.989	257.98
CDC42EP4_CGCATGCTTCAGCCCGTACG	CDC42EP4	272.67	350.284	383.243	325.173	291.851	346.55	351.626	346.533	288.778	358.031	388.885	351.528	295.262	294.278	375.496	370.823	370.573	338.65	350.145	524.613	266.893	481.659	274.079	264.313	342.916	317.427	309.804	371.242	384.38	351.436
LRRC37A3_GAAACAGGGAGCCTTTCCTG	LRRC37A3	210.507	214.858	148.911	207.898	180.759	180.07	196.65	187.864	154.746	127.5	92.7616	94.6422	66.4658	72.8111	86.5565	118.792	104.06	112.48	19.1228	13.4516	19.3001	1.90756	111.596	93.9502	93.6268	124.149	56.3279	44.7879	48.3352	36.9933
AKR7A3_CTGGCCCTCGCTGTACACGA	AKR7A3	615.98	679.732	589.871	868.906	578.053	548.704	643.346	582.633	565.371	578.259	667.17	685.48	641.651	712.942	595.442	677.969	619.868	641.015	725.347	482.134	892.768	536.978	723.139	687.716	718.572	684.938	760.427	577.266	664.034	670.747
FAM188A_CCATATACAGGATCTATCAA	FAM188A	357.438	371.118	360.156	255.874	427.42	397.513	308.65	436.657	392.348	441.743	339.828	374.513	324.66	365.572	399.749	386.341	437.202	372.514	362.673	385.141	282.884	386.281	418.26	380.812	415.29	422.531	364.851	386.171	326.838	349.489
ZNF771_AGTTGGAGCTCTGCGCGAAG	ZNF771	391.345	386.744	414.411	385.144	369.05	324.466	320.371	360.496	409.407	373.486	366.587	424.538	449.923	371.64	380.514	389.551	425.972	360.42	485.323	406.381	554.74	459.722	395.048	318.178	373.359	434.523	412.218	391.148	552.402	540.297
SPHK1_GTAGGCCAGTCGGCCGCGGT	SPHK1	128.565	95.0584	117.743	123.939	114.857	86.6375	106.79	130.743	80.4192	97.879	157.873	140.611	86.9169	153.207	90.3198	88.2912	86.8414	64.1015	102.867	90.6215	114.146	84.8864	65.1718	83.9289	83.8621	116.39	116.496	96.5428	136.95	103.192
DSPP_CCACATTAGCAAACGAAGAG	DSPP	118.675	100.267	146.602	183.91	146.867	100.228	165.395	161.208	164.494	194.47	90.9777	93.2902	88.1951	101.632	113.736	136.45	118.284	140.298	94.2951	116.817	149.438	166.911	75.885	101.466	72.9485	118.506	193.307	156.26	113.933	134.344
RAB8A_ACGGTTTCGGACGATCACAA	RAB8A	573.596	466.177	698.38	607.701	576.17	555.499	546.974	516.626	617.766	598.865	596.707	676.016	434.584	567.32	600.46	567.739	518.803	570.866	449.056	498.418	511.177	404.403	599.045	633.851	551.996	631.328	649.052	604.139	555.855	723.317
CASZ1_GAAGCCATCCAAGTACGACC	CASZ1	697.922	765.676	609.495	691.66	653.369	710.088	681.113	713.376	603.144	593.713	586.895	607.062	835.936	676.536	620.531	494.966	642.327	605.941	556.539	635.058	653.446	643.801	780.723	641.367	678.364	702.572	555.598	632.007	604.19	581.184
RND1_GGACGGACATTATCGTAGTA	RND1	217.571	242.204	241.259	161.254	246.661	224.238	244.836	224.675	219.325	285.91	241.715	256.886	291.427	277.592	213.673	245.075	249.295	220.122	170.127	162.127	249.247	203.155	268.276	326.947	287.199	279.336	280.36	242.85	252.034	255.059
TMEM41A_TCCAAATCCCCAGGTCGCTG	TMEM41A	483.177	592.487	507.913	441.116	574.287	479.054	445.393	472.199	512.977	643.941	364.803	351.528	405.186	480.856	556.972	629.275	570.458	517.65	603.357	518.949	534.337	550.331	626.275	581.239	594.502	514.232	326.446	283.657	494.861	647.383
GCSH_GGGACAAAATTGAACAAACA	GCSH	148.344	171.886	161.609	131.935	129.921	169.877	154.976	191.672	120.629	128.788	188.199	266.35	195.563	239.67	145.933	160.529	99.5682	164.487	87.0416	135.224	74.4432	144.021	144.628	157.836	152.79	160.124	202.269	131.378	118.536	170.364
RUNDC3B_TGAAGATGGAGCAATTGTCT	RUNDC3B	539.689	619.833	511.376	635.687	574.287	538.511	556.091	536.936	586.085	695.456	606.518	515.124	570.072	603.725	624.294	683.855	683.502	634.968	671.276	697.36	662.269	571.314	589.671	588.755	573.823	607.344	618.327	607.125	687.051	557.82
CDC14A_TGGGGTCCTATAATAGAGCC	CDC14A	129.977	130.217	162.763	97.2855	144.984	134.203	132.837	134.551	110.881	121.061	95.4374	98.6983	123.984	131.97	134.643	119.327	129.514	169.325	193.206	174.871	181.421	160.235	186.588	141.552	149.918	140.373	175.385	107.491	97.8213	167.443
TAS2R19_TAAACACAGTTGCATACCAA	TAS2R19	182.251	149.749	167.38	141.264	128.038	171.576	203.162	213.251	296.089	302.652	169.468	237.958	212.179	219.95	164.75	181.933	223.841	120.946	135.178	82.8337	167.084	89.6553	243.278	253.039	252.161	217.261	224.032	257.779	171.475	187.887
FERMT2_CTGGAGATTACTCTGGAAGG	FERMT2	406.886	291.686	365.928	301.185	352.104	426.392	406.324	371.92	461.801	588.562	386.209	435.354	506.163	453.552	403.094	345.673	454.42	350.744	319.153	314.343	304.39	210.785	311.575	444.698	369.912	368.921	300.842	462.808	322.235	472.151
CCNL2_CACAGAGACCGACCTCCGCG	CCNL2	271.257	229.182	233.178	278.53	284.319	312.574	378.975	337.648	318.021	267.879	313.07	243.366	239.021	207.815	217.855	224.206	205.874	238.264	215.626	207.438	223.881	137.344	188.82	211.701	231.482	228.548	227.872	326.454	321.084	295.946
ZNF280B_GAGTTATTAGGCACAACTTG	ZNF280B	180.838	171.886	203.165	109.28	195.823	169.877	164.092	157.4	183.989	117.197	109.708	110.867	67.744	62.1928	81.5387	73.8435	77.1092	56.8447	98.2515	31.1511	41.9088	38.1512	143.735	73.9075	94.2012	108.631	40.9658	38.8162	102.425	87.6157
RHCG_ACAAGACCGCTACATCGTCG	RHCG	655.538	701.869	769.95	1004.84	653.369	723.678	670.695	614.367	744.487	622.047	752.796	767.954	694.057	776.651	773.155	740.041	809.272	899.84	880.967	678.245	918.133	693.398	779.83	725.296	726.613	664.481	733.544	679.781	700.861	791.462
EIF1_ATAGCTTACCGAAAGAGTGG	EIF1	262.78	236.995	287.432	319.843	291.851	392.417	277.394	300.837	213.233	227.955	215.849	235.254	269.698	197.197	230.817	160.529	229.83	131.831	125.947	210.978	124.072	142.113	253.545	162.847	245.268	246.183	198.428	167.208	269.296	174.258
NDUFA8_ACATTGAGCTCCATAGTGAT	NDUFA8	265.606	298.197	227.406	262.537	325.743	246.322	316.464	257.679	349.702	275.607	257.77	229.845	268.42	191.129	335.772	277.181	241.06	286.643	300.03	298.06	319.83	256.567	261.58	210.449	205.06	211.618	200.988	254.793	314.179	257.98
Non-Targeting_GGAATTACGACTAACCGATT	Non-Targeting	423.839	533.889	371.7	381.146	395.411	455.271	303.441	354.149	434.995	417.274	406.724	413.722	416.69	430.799	449.927	448.412	436.453	475.319	401.578	359.654	433.425	406.31	425.402	452.214	386.57	422.531	453.184	547.408	415.453	446.84
FAM20A_CACAGTTGTGAAACCCAGTG	FAM20A	131.39	169.282	173.152	182.577	222.183	142.697	170.604	242.446	186.426	173.864	173.928	189.284	193.007	215.399	209.91	192.635	171.437	191.095	222.22	220.182	296.67	265.151	161.59	196.669	169.447	189.751	130.578	104.505	166.872	189.834
ATP2B4_TGTGCGTAATGAAGTGCCCG	ATP2B4	115.849	122.404	136.213	206.565	129.921	144.396	128.93	151.053	101.133	149.394	134.683	123.035	131.654	119.835	139.661	122.537	148.229	154.811	244.64	235.049	160.467	158.327	152.216	171.616	137.855	181.286	94.7334	73.6512	241.676	182.046
DOCK11_AGCATTTCACGGACAGATGG	DOCK11	601.852	582.07	527.537	595.707	770.11	754.256	623.811	718.453	647.009	669.698	676.981	754.434	508.719	611.31	587.079	642.118	537.519	607.15	602.697	411.336	568.526	488.335	620.918	732.812	749.015	719.502	506.952	502.62	583.475	482.86
MAGIX_GCACCTCCCCAATTGATCCA	MAGIX	631.521	549.515	565.63	502.419	691.028	633.643	647.253	519.165	486.171	645.229	445.969	494.844	594.358	671.985	577.043	558.107	527.786	501.927	389.709	469.391	406.405	526.486	584.315	611.303	633.561	557.967	720.742	559.351	491.408	551.006
ESX1_TCACGGTCTTGGTCGTCCGA	ESX1	234.524	346.377	221.635	246.545	273.022	259.912	177.116	300.837	224.199	238.258	241.715	283.927	244.134	174.443	255.488	235.978	295.71	270.92	173.424	235.049	130.689	120.176	189.713	194.164	211.378	241.95	262.437	277.685	272.749	302.761
GFM1_GTGACACCATCTATAACACA	GFM1	437.967	412.788	554.087	265.203	608.18	599.667	518.323	396.038	436.213	367.046	432.59	404.258	474.208	285.177	442.818	332.831	306.94	332.602	164.852	130.976	128.484	118.269	418.707	432.171	395.186	286.39	108.815	87.5852	479.9	285.238
MYPN_TCTGCACTCACTGACCATTG	MYPN	357.438	363.305	362.465	465.105	344.572	372.032	272.185	238.638	311.929	264.016	249.743	277.167	343.833	338.268	251.307	298.05	268.011	307.204	273.654	307.971	280.679	303.302	204.443	357.011	300.41	282.158	317.485	222.944	301.52	306.655
TMEM170A_AGAGGGCCAGTAATCCAGCA	TMEM170A	731.829	743.539	675.293	775.618	623.243	725.377	655.067	656.255	707.933	632.35	624.357	690.888	816.763	646.198	803.679	837.428	760.611	777.684	848.656	1101.62	918.685	997.653	736.531	989.609	790.946	735.726	892.286	818.126	1067.98	830.402
ENSA_CATGAAGAGACTCCAGAAAG	ENSA	159.646	240.901	182.387	122.606	186.408	127.408	171.906	180.248	99.9148	118.485	119.52	131.147	115.037	203.264	158.896	134.31	90.5846	100.385	171.446	181.243	172.047	183.126	120.523	132.783	155.662	157.303	125.458	124.411	107.028	172.311
POLE2_TCAGGGTGAGAACCTATCAC	POLE2	148.344	106.778	137.367	233.219	229.715	278.599	186.232	142.167	99.9148	118.485	100.789	164.948	112.481	130.453	117.918	87.7561	165.448	62.8921	118.034	114.693	39.7031	118.269	95.5258	172.868	116.028	145.311	47.3667	55.7361	64.447	131.424
ZDHHC2_AGGATCTTCCCATCTATACC	ZDHHC2	542.514	579.465	591.026	633.022	500.854	631.944	545.672	544.552	618.984	613.032	614.545	684.128	754.132	705.357	670.29	596.634	759.863	613.198	596.763	626.562	671.092	651.431	552.175	658.904	561.761	691.286	779.63	934.574	571.967	640.568
FABP12_TTTGAGGAAATCACGCCAGG	FABP12	535.45	523.472	549.469	550.396	521.566	574.186	575.625	542.013	612.892	619.471	631.492	544.869	554.734	577.938	601.296	661.381	660.294	679.718	479.388	476.471	430.668	507.411	530.302	458.477	496.854	531.162	633.689	594.186	515.576	437.105
C14orf37_ACTGTCTCTGATAAGCTCGA	C14orf37	202.03	226.577	230.869	165.252	184.525	205.552	234.418	173.901	176.679	255.001	197.118	242.014	287.593	292.761	223.709	186.214	246.3	243.102	162.214	287.44	223.33	258.474	266.937	256.797	223.441	217.967	189.467	187.114	239.374	259.927
C19orf45_GGGACTACACGAGACAAGAT	C19orf45	114.437	128.915	115.435	107.947	144.984	144.396	113.302	159.938	151.091	162.273	115.952	155.484	144.435	139.555	112.064	117.186	127.268	135.46	86.3822	118.233	167.084	179.311	143.289	129.025	124.07	146.017	125.458	198.062	105.877	116.821
PVRL1_CAATTGGATAGAGGGTACCC	PVRL1	152.582	261.736	242.413	207.898	190.174	186.865	196.65	236.1	224.199	148.106	208.714	243.366	163.608	219.95	206.565	189.96	232.076	195.933	137.157	213.102	129.035	253.705	182.124	253.039	259.053	217.261	270.118	202.043	211.754	245.324
GOLIM4_AGCCGTACCTTGTAACTGGG	GOLIM4	306.577	421.903	423.645	446.447	493.322	504.536	471.44	500.125	426.466	464.925	380.858	340.712	465.261	382.258	380.932	349.954	368.328	361.629	382.456	378.769	403.096	358.621	635.202	592.513	738.676	483.195	331.567	346.36	375.173	365.066
BEGAIN_GCCACCCGCCACCACCTACG	BEGAIN	560.881	437.529	503.295	570.386	525.332	543.608	523.533	486.162	728.647	713.486	872.315	719.281	810.372	705.357	851.766	735.225	715.693	766.799	904.705	917.542	1001.95	947.103	728.05	670.178	774.863	741.369	791.152	762.39	836.66	815.8
ALKBH4_CTGATCTGCGAGCGGCAGCG	ALKBH4	514.258	423.205	355.539	431.788	442.484	438.284	403.719	365.573	458.146	386.364	448.645	428.594	409.021	521.813	390.968	456.974	517.305	436.616	331.022	539.481	400.891	524.579	421.385	492.299	430.798	405.602	490.309	541.436	474.145	431.264
HERPUD1_TAATCGGGGACAGTATCCTG	HERPUD1	322.118	408.881	342.841	301.185	340.807	331.261	382.882	347.803	347.265	426.289	362.127	323.136	277.367	414.113	321.555	357.445	324.158	299.947	402.897	484.258	395.928	419.663	357.552	398.349	355.552	325.892	362.291	341.383	309.576	349.489
COX18_TTCGTGCAAATCAGTTGGGG	COX18	430.903	395.859	353.23	390.475	331.392	348.249	355.533	342.725	275.375	382.501	453.105	348.824	438.419	518.779	294.376	241.329	322.661	273.339	384.434	307.263	384.899	337.638	382.55	385.822	437.691	336.473	230.433	270.718	362.514	377.721
KRTAP8-1_CAGCCAACGCTATATCCCAG	KRTAP8-1	124.326	102.871	147.756	182.577	94.1454	130.806	143.255	149.784	120.629	124.924	95.4374	91.9382	102.255	204.781	92.4106	107.02	85.3442	125.784	139.794	82.8337	104.221	112.546	87.9373	97.7083	105.689	124.149	152.341	117.444	148.458	67.1721
ST7L_GACTGCCTGAACATCTGGAT	ST7L	259.955	238.297	274.735	245.213	242.895	227.636	274.79	225.945	280.249	330.986	247.067	266.35	371.953	345.853	348.735	302.865	340.628	256.406	316.515	148.676	254.21	255.613	303.986	258.05	329.704	251.12	248.355	248.822	202.548	144.079
AMT_AGAGGGGGTATACCTGCATG	AMT	604.678	649.783	609.495	650.347	576.17	563.993	571.718	704.491	639.698	602.728	542.298	638.159	576.463	706.874	544.846	575.23	595.912	544.258	617.204	716.476	540.954	653.339	626.275	625.082	591.055	589.709	678.496	859.928	1374.1	637.648
ARHGAP42_GTTTCTGTTTACTTAAGACA	ARHGAP42	365.915	304.708	319.754	198.569	273.022	297.285	210.976	285.604	416.718	417.274	327.341	373.161	356.615	307.93	354.171	327.48	397.524	384.609	367.289	433.992	435.079	468.306	261.58	304.399	269.393	287.095	460.865	373.233	370.57	349.489
FAM131B_GCCCTGCCACTCAATCATGT	FAM131B	515.671	510.45	552.932	539.734	483.908	416.2	507.905	511.549	587.304	642.653	503.053	589.486	676.162	580.972	587.497	528.142	641.579	520.069	523.569	653.466	647.932	711.52	392.37	453.467	469.283	505.768	723.302	554.375	562.76	482.86
COQ9_TGTCTCAGGTATACAGACCA	COQ9	388.519	507.846	511.376	605.036	470.727	468.862	307.348	288.143	438.65	477.804	404.94	459.691	379.622	371.64	382.605	432.894	425.972	439.035	491.917	580.544	531.58	525.533	350.857	355.758	436.542	375.27	352.05	331.43	339.497	379.668
NDST1_CGTGACGCGACCTAGCGAGG	NDST1	491.654	539.098	519.456	498.421	408.591	426.392	402.417	425.233	350.92	454.622	535.163	429.946	452.479	482.373	362.116	341.393	371.322	374.933	327.066	336.291	252.004	360.529	470.487	488.541	358.999	454.274	451.904	310.529	318.782	310.549
INIP_TAGTGTCAATACCTAGCTCC	INIP	135.629	100.267	114.28	79.9607	150.633	149.492	148.464	129.474	62.1421	108.182	156.089	131.147	146.992	74.328	104.955	138.055	151.973	118.527	152.982	85.6656	116.352	108.731	141.057	119.004	129.814	105.809	136.979	102.515	145.006	160.629
FOXK1_CTAACTTGGACCCAAACTCA	FOXK1	221.809	290.384	251.648	198.569	237.247	220.841	278.696	208.174	236.384	202.197	228.336	223.085	282.48	166.859	152.206	153.038	177.426	191.095	185.293	162.127	304.942	199.34	287.47	211.701	184.382	198.921	241.954	161.236	226.715	154.788
SGSM3_GTTCACCCATAACCACGATG	SGSM3	493.066	446.644	629.119	515.746	433.069	487.548	503.998	545.822	427.684	526.743	494.134	408.314	492.103	524.846	424.42	507.808	420.732	488.623	443.78	402.133	398.685	353.852	516.911	563.701	510.065	500.124	451.904	422.002	408.548	366.039
SEH1L_TTAGCAACCTGTTCCGCAGA	SEH1L	248.652	191.419	268.963	161.254	295.617	205.552	222.697	142.167	280.249	140.379	131.115	110.867	141.879	56.1252	119.59	120.932	144.486	82.2435	105.505	99.8252	103.669	75.3486	200.872	97.7083	145.323	100.871	26.8838	51.7549	128.894	91.5098
ZNF274_GGACAAGGCACAATCCCTTG	ZNF274	182.251	182.304	265.5	233.219	239.129	353.345	227.906	191.672	213.233	209.925	262.23	233.902	253.081	257.873	250.052	225.276	270.257	206.818	225.517	171.331	269.65	174.542	149.092	177.879	143.025	225.726	226.592	141.331	194.492	151.867
TYRO3_AGAAAGGCCCGAGCGCATCG	TYRO3	172.361	231.786	213.554	182.577	261.724	232.732	274.79	264.025	255.879	216.364	228.336	200.101	212.179	233.602	296.885	268.084	232.825	262.453	346.188	421.956	308.25	394.865	297.737	253.039	259.628	210.913	309.804	263.751	229.017	224.88
NFIL3_GGAATTAGAGAGCTACACAA	NFIL3	172.361	117.195	146.602	127.937	150.633	159.685	182.325	156.13	151.091	128.788	148.954	133.851	164.886	124.386	182.312	175.512	248.546	206.818	302.008	155.756	270.201	118.269	148.199	137.794	163.703	178.465	106.255	182.137	197.944	191.781
ATPAF1_GTAGCGGTCGTAGAAAGGGT	ATPAF1	91.8319	158.865	191.622	51.9744	129.921	171.576	166.697	119.319	136.469	97.879	124.871	98.6983	109.924	91.0138	138.407	84.5455	118.284	93.1286	215.626	222.306	163.775	139.252	116.952	101.466	102.817	110.747	156.182	143.321	112.782	67.1721
EIF4E2_GGTCCCCAGGACGTACCATG	EIF4E2	669.666	563.839	578.328	712.983	625.126	528.319	653.765	709.568	603.144	698.032	453.105	528.644	486.99	476.306	613.84	595.564	545.005	463.224	590.169	497.71	455.482	571.314	509.322	577.481	420.459	547.386	586.323	291.619	494.861	335.86
LETM1_GTCACGGAAGACCGCCTGAG	LETM1	73.4655	48.1803	77.3413	15.9921	62.136	67.951	70.3253	46.966	59.7052	82.4244	28.542	89.2341	24.2856	27.3041	22.1618	63.1416	11.2295	61.6826	21.7604	4.24788	3.30859	6.67646	65.6182	27.5587	49.9726	44.4398	12.8018	9.95287	11.5084	101.245
ATG14_TGCGCCAAATGCGTTCAGAG	ATG14	108.785	277.362	177.769	385.144	212.769	270.105	144.558	200.558	187.645	475.228	188.199	233.902	258.194	348.886	234.581	306.611	206.623	356.791	122.65	184.783	67.8261	276.596	112.935	306.904	88.4573	304.025	106.255	307.544	80.5587	404.979
XRCC2_TGTATACTTCCCAAATCAGA	XRCC2	320.705	234.39	327.835	215.894	365.284	273.503	282.603	298.298	314.366	345.152	278.285	321.784	223.683	324.616	273.05	243.47	267.262	290.271	255.19	193.987	388.208	150.697	291.488	241.765	300.41	311.784	110.096	128.392	310.726	268.688
ARHGAP8_CGTGAACTTTGACGACTACG	ARHGAP8	120.088	154.958	159.3	185.242	188.291	132.504	145.86	154.861	151.091	162.273	180.172	129.795	288.871	204.781	183.567	157.319	169.94	129.412	188.59	131.684	168.738	209.832	135.7	207.943	154.513	165.768	179.225	179.152	115.084	189.834
FADS1_AGTTCATATACTTCTTCACA	FADS1	309.403	276.06	282.815	185.242	278.671	281.996	277.394	310.991	371.634	296.213	392.453	354.232	283.758	347.369	449.09	363.867	399.77	359.21	489.279	497.002	505.663	474.982	314.253	270.577	280.306	235.602	385.334	352.331	342.95	330.993
C14orf79_GGGTCCCTCGAGGAGTTCAA	C14orf79	303.752	334.658	330.143	250.543	327.626	360.14	402.417	314.799	430.121	440.455	493.242	365.049	336.164	405.012	480.451	371.893	399.77	356.791	458.287	496.294	357.328	370.066	328.984	328.2	335.448	299.792	416.059	356.313	417.754	434.185
FPGT-TNNI3K_TGGAGCTGATATGAATCTAG	FPGT-TNNI3K	282.56	265.643	212.4	221.224	207.12	191.961	278.696	238.638	166.931	227.955	249.743	251.478	195.563	144.105	203.638	257.382	216.355	198.352	234.089	167.083	297.773	138.298	318.271	308.157	329.704	299.087	166.423	289.628	215.207	158.682
WNT11_GACAGGCCTTCATGACCTCG	WNT11	183.664	248.714	215.863	222.557	218.417	202.154	199.255	159.938	112.1	162.273	135.575	235.254	272.254	191.129	176.458	159.994	168.442	139.088	227.495	155.756	270.201	163.096	179.446	126.52	182.084	171.411	171.544	121.425	181.832	189.834
VIM_ACAGCATGTCCAAATCGATG	VIM	169.536	135.426	188.159	206.565	242.895	219.142	225.301	198.019	227.854	212.5	267.581	251.478	245.412	265.457	256.743	277.716	239.563	320.508	247.937	210.27	312.11	202.201	267.829	222.975	220.569	298.382	203.549	230.907	212.905	223.907
AMY1B_GACTAGATGCAACAATGTTG	AMY1B	306.577	231.786	326.68	241.215	367.167	428.091	298.231	225.945	282.686	158.409	296.123	224.437	250.525	215.399	288.104	237.048	294.213	243.102	187.931	174.163	282.333	210.785	215.156	249.281	214.825	177.759	165.143	230.907	271.598	218.066
CLPB_TGTGACTACTGGGAGTCTCG	CLPB	108.785	76.828	92.3478	95.9528	118.623	112.119	93.767	83.7773	134.032	55.3789	49.0566	77.0658	155.939	91.0138	84.8839	95.7825	73.366	91.9192	69.2377	58.7624	80.509	55.3192	55.7978	68.8968	45.3774	69.834	38.4054	73.6512	96.6704	81.7747
TMED4_GCTGTCCCGGCAGTACGGCT	TMED4	351.787	260.434	362.465	445.114	397.294	404.308	321.673	281.796	255.879	315.531	419.211	371.809	288.871	342.819	276.395	264.874	302.448	215.284	362.014	291.688	399.236	338.592	239.261	243.018	284.327	260.29	247.075	284.652	326.838	436.132
KANK4_TGTCCATGGACTCTTGACCA	KANK4	204.856	192.721	227.406	231.886	207.12	258.214	281.301	151.053	231.51	235.682	264.906	279.871	269.698	194.163	264.269	206.548	199.885	228.588	234.749	220.89	265.239	157.374	184.356	170.363	169.447	246.888	248.355	230.907	217.508	257.98
CHRM4_GATGAGAAGGTTCATGACGG	CHRM4	392.758	358.097	368.237	378.48	423.655	343.152	414.138	417.617	408.188	346.44	280.069	347.472	318.269	379.224	219.109	267.549	254.535	303.575	302.008	280.36	427.911	229.861	329.43	349.495	321.088	365.394	218.911	230.907	255.486	290.105
PLEKHG1_TTCAAGAGATAGGACCCCAG	PLEKHG1	421.014	433.622	389.015	450.445	412.357	351.646	295.627	337.648	372.853	406.971	451.321	456.987	481.877	400.461	346.226	392.227	368.328	413.636	403.557	366.734	540.403	459.722	395.941	412.128	360.722	506.473	439.102	490.676	268.145	338.781
CCER1_CGGTGCGGTCTATTGTACGC	CCER1	103.134	91.1519	138.522	131.935	97.9113	93.4326	108.093	105.356	127.94	137.803	136.467	116.275	117.593	98.5983	127.117	135.38	142.24	148.764	79.1288	64.4262	87.1262	41.9663	63.3863	97.7083	112.582	127.676	125.458	141.331	120.838	99.2978
HIST1H3B_CAGCTTCCGAATCAGCAACT	HIST1H3B	199.205	222.671	223.943	170.583	220.3	169.877	285.208	264.025	202.267	197.046	216.741	300.151	184.059	229.051	197.366	223.671	208.869	268.501	318.493	464.435	378.282	339.546	272.293	288.114	274.562	155.187	317.485	371.242	164.57	175.231
FOXO6_CGGCGCTGGGGCCATCGCCG	FOXO6	422.427	399.766	457.121	338.5	369.05	399.212	358.138	366.843	388.693	387.652	425.454	477.267	470.374	426.248	403.094	369.753	345.869	407.589	433.889	292.396	422.396	434.924	371.837	313.167	391.739	371.743	369.972	347.355	347.553	326.125
MICU2_GCAACATGAAATCCAGAATG	MICU2	567.945	795.626	601.415	557.059	677.847	584.378	570.416	674.026	661.631	607.88	550.326	596.246	554.734	482.373	689.943	641.583	659.546	641.015	652.153	453.815	655.652	600.881	601.277	777.908	657.111	749.129	812.915	804.192	738.838	679.509
TEX19_AGCATGCGGTATGAGGAAGA	TEX19	221.809	252.621	272.426	349.162	293.734	222.539	290.417	298.298	258.316	238.258	280.069	239.31	285.036	289.727	240.435	308.216	276.994	251.568	201.778	241.421	223.881	333.823	343.714	278.093	273.413	345.643	455.744	394.134	257.788	276.476
SELENBP1_CATCTCCTCTCGCATCTATG	SELENBP1	250.065	147.145	205.474	245.213	273.022	203.853	223.999	138.359	229.073	190.606	255.094	247.422	182.781	226.018	241.271	216.715	238.814	239.474	339.594	296.644	453.828	315.701	283.899	179.132	284.901	231.369	174.105	283.657	176.078	198.596
GLYATL3_TCTGACTCAGGTTTACGGAG	GLYATL3	326.356	500.033	419.028	299.852	282.436	319.37	304.743	313.53	475.204	376.061	354.099	239.31	258.194	227.535	287.267	254.172	343.623	264.872	330.363	367.442	357.879	302.348	239.707	276.84	204.486	332.241	366.132	267.732	303.821	245.324
BMP3_TATCACTCAACTCTTGAGGA	BMP3	528.386	632.854	683.374	593.042	482.025	387.32	533.951	507.741	510.54	643.941	524.46	550.277	525.336	643.164	715.868	669.943	750.879	730.515	497.192	575.588	532.131	480.705	683.858	602.534	621.498	691.286	761.707	791.253	780.268	635.701
ZBTB45_CAGCTGTCGCACTGTCTGCG	ZBTB45	84.7679	92.454	110.817	103.949	52.7215	56.0595	97.674	77.4305	101.133	95.3032	87.4099	152.78	120.15	115.284	112.482	123.608	79.3551	76.1961	73.1941	65.1342	60.106	41.9663	101.329	92.6976	79.2669	47.9668	101.134	148.298	102.425	64.2515
TUBB_GCTGACCACACCAACCTACG	TUBB	31.0816	76.828	106.2	87.9567	112.975	122.312	89.8601	44.4273	21.9325	21.894	30.3259	35.1528	38.3457	15.169	16.3077	24.0794	10.4809	16.9325	21.101	4.95586	13.7858	1.90756	35.2642	12.5267	24.1247	26.805	3.84054	7.96229	13.8101	0
IGF2BP1_TTACCCTTTACAACCCTGAG	IGF2BP1	395.583	481.803	364.774	459.774	425.537	356.743	363.347	472.199	322.895	631.062	357.667	355.584	426.915	286.694	429.856	489.615	455.169	338.65	439.824	844.62	567.974	975.717	346.393	428.413	279.157	450.747	485.188	512.573	544.347	501.357
FAM127B_GGTATCTCCGTCAAACGTCT	FAM127B	255.716	230.484	195.085	189.24	257.959	224.238	197.953	232.291	281.467	255.001	205.146	258.238	311.878	165.342	261.342	219.925	245.552	238.264	136.497	179.119	213.404	165.004	244.171	250.534	218.271	183.402	227.872	246.831	272.749	278.423
OR2S2_TGATCACGGAGTACCTAAGG	OR2S2	264.193	337.262	322.063	285.193	318.212	334.658	260.464	229.753	231.51	242.122	278.285	297.447	246.691	282.143	224.963	328.55	218.601	279.386	229.473	187.615	184.178	264.197	272.74	305.651	284.327	299.792	439.102	310.529	280.805	238.51
METRNL_GGCTGACGCACGAGGCACAC	METRNL	210.507	136.728	234.332	302.518	165.696	208.949	229.208	214.521	180.334	227.955	190.875	167.652	189.172	238.153	250.888	176.582	215.606	168.115	135.838	234.341	142.269	145.928	180.338	185.395	180.361	170	179.225	205.029	208.302	167.443
SLCO4A1_CCGAGAAGCATGGCGCCCGG	SLCO4A1	535.45	346.377	419.028	435.786	463.196	553.8	531.347	503.933	422.81	506.137	386.209	463.747	462.705	445.968	442.818	376.709	463.404	397.913	484.664	446.028	349.056	461.629	440.579	387.075	412.992	373.153	389.175	308.539	344.101	311.523
ENSA_CCCTGCGGAGGAGACCGGCG	ENSA	50.8607	119.8	85.4217	83.9587	90.3796	107.023	108.093	91.3934	53.6128	59.2425	22.2985	73.0097	102.255	89.4969	43.4873	62.6065	29.9453	39.9123	32.3109	14.8676	22.0573	32.4285	94.1867	88.9396	79.2669	52.9046	90.8928	40.8068	63.2961	33.0993
UPF2_GGAATTGATATATTCACACC	UPF2	334.833	358.097	327.835	223.89	295.617	248.021	270.883	239.908	331.425	288.485	260.446	270.406	310.6	188.095	305.248	248.821	291.218	250.359	216.285	94.8693	171.495	102.054	310.236	276.84	241.821	235.602	153.622	133.368	295.765	242.404
ZEB2_TGGAGTGTATGAACTACTGT	ZEB2	170.949	203.138	120.052	167.917	222.183	147.793	160.185	186.595	121.847	85.0002	234.58	151.428	163.608	122.869	202.801	125.213	190.153	125.784	114.077	121.065	70.0318	75.3486	214.71	140.299	162.555	130.498	92.173	175.17	174.927	163.549
IL26_CAAGAAAATACGCTTTGTGG	IL26	248.652	201.836	255.111	218.559	231.598	215.744	156.278	224.675	303.4	279.47	197.118	279.871	200.676	226.018	257.997	275.575	325.655	380.981	337.616	380.893	342.439	444.461	276.757	380.812	257.33	232.78	186.906	221.949	256.637	210.278
IFI35_GATTCTGTCATACCATCACC	IFI35	320.705	350.284	328.989	266.536	370.933	406.007	462.324	293.22	397.222	354.167	392.453	346.12	374.509	288.21	361.697	355.305	393.032	396.704	464.881	651.342	472.025	625.679	367.819	358.264	358.999	439.461	290.601	311.525	349.855	384.536
RBAK_AGGGAACCCTCACTGTACAT	RBAK	361.676	316.427	368.237	405.134	323.86	307.478	424.556	432.849	275.375	369.622	267.581	327.192	361.728	382.258	331.591	315.173	280.737	292.69	408.832	377.353	410.816	350.037	288.363	365.78	319.94	300.498	465.986	390.152	317.631	281.344
NPM1_TTCAACCTTAAGACCACTGG	NPM1	135.629	96.3605	130.441	211.896	158.164	178.371	207.069	168.824	199.83	170	138.25	169.004	172.556	191.129	125.444	216.18	182.666	175.372	136.497	26.1953	45.7688	58.1806	149.092	169.11	187.254	206.68	115.216	147.302	165.721	114.874
SSPN_CTCCATGTCGTCGGGCCCAG	SSPN	149.757	226.577	167.38	266.536	154.399	137.601	192.743	229.753	168.149	185.455	198.902	221.733	146.992	216.916	166.005	164.81	188.656	180.21	215.626	172.039	177.561	206.97	151.324	174.121	233.78	209.502	158.742	162.232	154.212	240.457
ZNF8_GTCACGGTAGAGGATCCTCT	ZNF8	145.518	121.102	178.924	131.935	156.281	113.818	91.1624	134.551	106.007	130.076	64.2195	158.188	76.6914	145.622	104.955	133.775	151.224	107.642	89.0198	138.764	178.112	159.281	122.755	141.552	167.724	132.614	96.0135	130.383	100.123	153.814
CCBL2_AATACTCCACATAACCCACT	CCBL2	190.728	154.958	189.313	183.91	173.228	144.396	178.418	211.982	197.393	140.379	296.123	228.493	249.247	195.68	275.141	237.584	271.754	229.798	209.691	135.932	193.552	152.605	163.376	219.217	168.873	191.162	273.959	388.162	201.397	172.311
NDUFA6_TGGCGGTAGAAGTAGCTTGG	NDUFA6	370.153	382.838	349.767	306.516	382.231	378.827	457.114	437.927	399.659	341.289	458.456	331.248	264.585	209.332	355.425	290.558	288.224	312.041	236.727	325.671	262.481	249.89	301.308	249.281	337.172	201.037	391.735	281.666	360.212	257.98
HLA-DMA_GCAGCATCATTCCGTCCCTG	HLA-DMA	250.065	306.01	279.352	374.482	190.174	214.046	204.464	231.022	191.3	203.485	211.389	274.462	200.676	226.018	182.312	222.066	197.639	228.588	104.846	81.4177	147.232	123.991	180.338	152.826	175.766	230.664	245.795	267.732	230.168	196.649
ZMAT4_AAGGCAAAATCCACGCCAAG	ZMAT4	185.077	158.865	200.856	245.213	207.12	205.552	174.511	262.756	208.359	243.41	339.828	239.31	210.901	288.21	268.032	241.864	205.874	232.217	214.966	273.28	268.547	198.386	281.221	290.619	302.133	301.203	221.471	294.605	278.503	247.271
PLN_TGCTTGTTGAGGCATTTCAA	PLN	645.649	782.604	692.608	595.707	749.398	747.461	668.09	707.029	631.169	690.304	813.448	699	943.304	658.333	876.437	833.683	759.863	902.259	766.23	850.992	686.532	687.675	700.374	801.709	697.893	785.809	818.035	911.683	677.844	731.105
POLR3G_ACATCTTCAGTATTAGTGAG	POLR3G	291.036	289.082	310.519	205.232	276.788	382.224	266.976	280.527	224.199	226.667	422.779	385.329	421.802	385.292	399.749	418.982	434.207	422.102	429.273	477.179	454.38	374.835	364.694	308.157	287.773	296.266	358.451	428.969	353.307	354.357
CACNB3_CCTGGCTCTCTACTTCACGC	CACNB3	67.8143	109.382	83.113	105.282	128.038	107.023	112	99.0095	75.5453	73.4092	67.7873	100.05	95.8642	94.0476	76.9391	123.608	94.3278	89.5002	42.8614	84.2496	53.4889	126.853	83.9199	135.288	84.4365	122.739	67.8496	74.6465	97.8213	89.5628
PRPS1_GCTTGGCTGAGATTGGCGCC	PRPS1	169.536	149.749	199.702	269.201	209.003	137.601	179.72	227.214	213.233	150.682	152.521	174.412	270.976	162.308	190.257	223.136	230.579	235.845	180.677	240.713	126.278	188.848	173.643	132.783	151.067	162.946	93.4532	62.7031	162.268	193.728
SPINK4_ACAGCCCATCTGTGAACACA	SPINK4	346.136	287.779	312.828	219.892	321.977	366.935	244.836	228.483	300.963	350.304	199.794	273.11	185.337	174.443	243.78	192.1	251.541	203.19	198.481	174.871	249.798	264.197	266.49	211.701	170.022	213.029	207.389	195.076	294.615	349.489
PCDHA13_AACGGATTGGTAAAATTCCG	PCDHA13	189.315	181.002	222.789	73.2973	158.164	208.949	197.953	205.635	232.728	265.304	297.907	197.397	167.443	119.835	123.772	137.52	166.197	172.953	287.501	390.097	337.476	251.798	154.895	246.776	188.977	263.817	199.708	166.213	161.117	176.205
CDH5_GCAGATCTCCGCAATAGACA	CDH5	363.089	371.118	474.437	410.465	455.664	445.079	502.696	376.998	445.961	486.819	452.213	481.323	366.84	403.495	474.597	408.28	411.748	410.008	559.836	539.481	570.732	504.549	468.702	526.121	418.736	546.68	483.908	461.813	409.698	370.907
NDUFB1_ATCCAATGACAAATCCCATA	NDUFB1	388.519	322.938	421.337	255.874	329.509	319.37	358.138	406.193	346.046	334.849	306.827	354.232	411.577	356.471	389.295	326.945	361.59	338.65	232.77	160.004	307.699	112.546	340.143	326.947	361.296	282.158	316.205	302.567	380.928	333.913
XAGE2_AGAAACCACCCACTAAAAGT	XAGE2	221.809	161.469	214.709	131.935	180.759	166.48	165.395	168.824	165.712	149.394	185.523	193.341	121.428	224.501	126.281	149.292	157.213	120.946	133.2	185.491	210.095	186.941	194.176	221.723	195.87	195.394	207.389	206.024	223.263	149.92
ROBO1_TCCTGGAATCCGATACAGTG	ROBO1	423.839	519.566	452.504	589.044	459.43	472.259	467.533	423.964	500.792	436.592	453.105	455.635	499.772	558.218	365.461	418.982	538.267	453.548	385.093	269.74	454.931	323.331	490.574	478.52	448.605	481.079	372.533	434.94	528.235	494.542
DNASE1L1_CTTCTCTACGGCCTTAGGAG	DNASE1L1	176.6	233.088	253.956	245.213	265.49	259.912	238.325	252.601	155.965	240.834	137.358	194.693	171.277	188.095	229.981	194.776	237.317	245.521	183.315	225.138	199.618	283.273	130.344	177.879	136.707	175.643	133.139	143.321	256.637	208.331
TGDS_GCTGCTTTAGATGATGCATA	TGDS	436.555	407.579	324.372	382.478	342.689	343.152	256.557	470.93	291.215	356.743	366.587	333.952	391.126	335.234	399.331	391.157	434.207	393.075	485.323	399.301	405.302	433.016	317.378	399.602	336.023	418.299	421.179	450.865	415.453	431.264
SLCO1B1_ATGTGGATATATGTGTTCAT	SLCO1B1	826.487	795.626	813.815	611.699	694.793	740.665	661.579	755.265	815.158	905.381	771.526	757.138	690.222	788.787	980.138	902.71	932.797	911.935	817.004	726.388	907.105	815.482	803.042	761.623	755.333	787.22	800.113	861.918	795.229	798.277
SARAF_TATGTACTAAGAGGTTCTTG	SARAF	282.56	348.981	316.291	226.555	259.841	338.056	203.162	318.607	375.29	377.349	302.367	329.896	355.337	297.312	360.861	331.226	344.371	302.366	337.616	387.973	421.294	456.86	362.909	418.392	327.407	421.12	382.774	340.388	376.324	365.066
GLYATL2_GAGCAAACTTTGCAGATCCA	GLYATL2	477.526	524.774	444.424	341.165	434.952	402.609	377.673	397.307	434.995	431.44	419.211	463.747	393.682	392.876	402.258	476.237	456.666	435.407	387.731	290.98	464.857	189.802	480.307	501.068	445.158	435.934	430.141	441.907	403.944	376.748
LMAN2_CCCCAATGATGAGACCACTG	LMAN2	170.949	214.858	174.306	199.902	210.886	163.082	187.534	232.291	193.737	284.622	177.496	214.973	223.683	236.636	162.659	198.521	212.612	191.095	203.097	145.844	190.244	247.029	189.266	130.278	172.894	182.697	195.868	161.236	207.151	146.026
PVR_ATTGGTGCCCTCAAGCCAGG	PVR	508.607	734.424	591.026	814.266	659.018	625.149	578.23	549.63	553.187	614.319	701.955	709.817	475.486	615.86	525.193	585.397	576.448	544.258	833.49	818.425	682.672	794.498	566.013	563.701	508.342	574.896	617.047	594.186	616.849	443.92
ZNF275_TCCTGAATTCAGACAGCACG	ZNF275	399.822	410.183	412.102	487.76	404.825	399.212	505.3	658.794	337.517	336.137	399.588	369.105	499.772	459.62	503.449	505.133	566.715	537.001	553.901	574.172	529.926	667.646	436.116	508.584	504.896	490.249	344.369	503.615	454.581	372.854
C10orf2_AAATCCGCCAGTATTTGCGG	C10orf2	404.06	317.729	440.961	250.543	549.809	455.271	433.673	376.998	536.128	257.576	405.832	287.983	366.84	226.018	441.982	241.864	301.699	208.028	213.648	26.1953	147.232	37.1974	381.657	165.352	396.909	124.855	87.0523	93.557	437.319	216.119
KLRC4_TCCAGAGAAGCTCACTGCTG	KLRC4	324.944	483.105	421.337	537.069	357.753	429.79	382.882	418.886	383.819	354.167	436.158	331.248	331.051	376.191	451.599	451.088	412.497	389.447	461.584	547.977	429.014	455.907	315.592	316.925	334.874	323.776	421.179	350.341	405.095	467.284
ACRBP_GACTCTACTTCTCGTACCCG	ACRBP	220.396	174.491	193.93	186.575	188.291	220.841	242.232	255.14	158.401	144.243	196.226	210.917	205.788	216.916	167.259	161.6	173.683	162.068	239.364	227.97	208.993	228.907	200.426	167.858	157.385	176.349	192.027	199.057	177.229	194.702
ZSCAN5B_CTGTGAACCAGATGCATCCG	ZSCAN5B	488.828	380.233	402.867	449.112	402.943	453.573	329.487	397.307	392.348	385.077	434.374	398.849	976.537	529.397	460.798	429.149	434.207	413.636	307.283	407.797	350.159	452.092	428.081	457.225	396.335	419.004	464.706	431.954	445.374	524.721
GIPR_CCAGCAGACGTACATATCGA	GIPR	131.39	225.275	174.306	223.89	203.354	144.396	167.999	187.864	165.712	217.652	154.305	175.764	166.165	175.96	166.005	242.399	200.634	253.987	127.265	150.092	138.961	165.958	194.176	217.965	189.551	199.627	215.07	174.175	162.268	184.967
TSSK3_CCAGCTGGGCAAGACCATTG	TSSK3	364.502	256.527	431.726	331.837	459.43	450.175	364.65	364.304	255.879	358.031	328.233	386.681	273.533	250.288	372.987	323.734	282.235	319.298	493.236	408.505	524.411	431.108	300.862	339.474	324.535	273.693	271.398	254.793	477.598	312.496
OR56A1_ATAAACGTGCAGGACTCCAT	OR56A1	315.054	290.384	300.13	265.203	254.193	261.611	255.255	243.716	437.432	396.667	272.041	214.973	316.991	291.244	298.557	305.006	281.486	291.48	262.444	398.593	220.573	330.008	254.438	291.872	286.625	394.315	340.528	278.68	352.157	319.311
INSM2_GAAGTTGAGCTTTGCCGATG	INSM2	447.857	518.263	480.208	422.459	500.854	411.103	438.882	408.731	461.801	404.395	380.858	427.242	407.742	420.181	403.512	461.79	431.961	499.508	552.582	624.439	417.985	610.419	368.712	344.484	486.515	340	340.528	559.351	369.419	454.628
PGBD1_TTCTGCTACCAGGAGGCTCA	PGBD1	521.322	490.918	393.632	519.744	414.24	439.982	450.603	453.159	375.29	436.592	443.293	485.379	416.69	482.373	398.494	434.5	464.153	431.778	434.549	593.287	445.005	382.466	369.605	435.929	395.76	363.983	512.072	452.855	492.559	413.741
Non-Targeting_GTCCTCATCCGGTCAGGCTG	Non-Targeting	1260.22	1506.61	1395.61	1547.24	1378.29	1316.55	1448.18	1299.82	1144.15	1352.28	1527.89	1521.04	1394.5	1380.38	1576.42	1344.7	1328.82	1292.92	1614.89	1871.19	1621.76	1683.42	1357.9	1419.28	1368.22	1336.72	1929.23	2018.44	1459.26	1466.1
UGT2B11_TTGTGTAGCCAGGAGTAAAG	UGT2B11	322.118	239.599	330.143	166.585	346.455	389.019	401.115	462.044	319.24	279.47	245.283	281.223	193.007	235.119	237.508	163.74	177.426	243.102	171.446	105.489	118.558	88.7015	295.059	321.936	253.309	301.909	75.5307	122.42	134.648	178.152
MAD2L2_CAAGACCTCAACTTTGGCCA	MAD2L2	483.177	347.679	510.221	421.126	434.952	462.067	453.207	416.348	358.231	365.758	319.314	413.722	314.435	318.548	326.573	290.023	294.961	320.508	372.565	371.69	333.065	196.479	329.877	355.758	327.981	438.755	298.282	282.661	356.76	355.33
NAF1_CCCTCAAACGACTGTAGCGG	NAF1	347.548	455.759	450.195	254.541	348.338	365.236	393.301	411.27	442.306	345.152	456.672	363.697	443.532	382.258	394.313	336.042	422.978	483.785	444.44	436.824	518.346	450.184	408.44	393.338	452.626	386.556	500.551	513.568	431.564	514.986
MAGEA1_CCATCAACTTCACTCGACAG	MAGEA1	207.681	171.886	143.139	139.931	176.993	171.576	182.325	222.137	209.577	226.667	178.388	252.83	158.495	253.322	186.494	189.425	173.683	203.19	221.561	225.846	301.633	194.571	195.069	229.239	179.787	165.768	227.872	245.836	165.721	154.788
RBM28_AAAAAGCAGTGATCATTCTG	RBM28	488.828	510.45	521.765	398.471	431.186	402.609	447.998	412.54	464.238	499.698	318.422	340.712	463.983	282.143	299.394	313.032	315.175	267.291	249.915	185.491	261.93	172.634	320.056	377.054	423.331	363.278	304.683	277.685	379.777	247.271
FBXL20_ACATGTCTCTAAAAGCTCTG	FBXL20	456.334	1045.64	757.252	574.384	615.711	596.27	573.021	642.292	681.126	703.183	712.659	686.832	549.621	605.242	641.438	648.539	652.808	793.407	511.699	628.686	599.406	662.877	519.143	764.129	667.45	666.597	700.259	653.903	576.57	684.376
Non-Targeting_GAGAGTGCGCCTTGATAGTA	Non-Targeting	617.393	717.495	592.18	683.664	506.503	499.44	591.253	554.707	577.556	570.531	709.091	682.776	577.742	684.121	699.979	658.706	679.759	677.299	608.632	633.642	720.169	659.062	532.088	576.228	619.201	537.51	805.234	784.286	639.866	625.966
DPPA4_CGGTGAATCAGATTAACAGG	DPPA4	227.46	309.916	240.104	233.219	276.788	227.636	282.603	307.183	297.307	312.955	321.99	270.406	200.676	289.727	286.013	314.638	321.912	266.082	226.176	160.711	159.364	107.777	224.53	300.641	261.925	273.693	272.678	219.958	266.995	264.794
SCGB1D4_CTTATTCTTAAGTGACGCTG	SCGB1D4	248.652	238.297	267.809	326.506	308.797	302.382	285.208	283.066	261.972	264.016	228.336	239.31	306.765	330.684	257.161	287.883	279.989	260.034	338.275	272.572	399.236	317.609	336.572	268.071	301.559	302.614	279.079	355.317	277.352	264.794
RPL22L1_ATGGCAAAACTGGAAATCTC	RPL22L1	535.45	518.263	610.65	501.087	546.044	604.764	639.439	635.946	742.05	770.153	634.168	753.082	641.651	634.063	746.811	687.601	859.431	641.015	707.543	570.632	592.237	717.242	705.284	647.63	591.63	664.481	792.432	730.54	533.989	744.734
ROS1_TACACCCCAGTCTACCGCAG	ROS1	292.449	246.11	292.05	309.181	344.572	366.935	316.464	331.301	297.307	209.925	322.882	358.288	287.593	400.461	262.178	314.103	336.885	298.737	341.572	417	373.871	420.617	226.316	283.103	247.565	227.137	299.562	224.935	304.972	259.927
OR5A1_GGGCATCTATCTTACCACCC	OR5A1	316.467	231.786	330.143	299.852	295.617	341.454	308.65	336.378	260.753	227.955	265.798	331.248	440.975	420.181	300.648	318.918	378.06	284.224	267.719	373.814	262.481	254.659	350.41	264.313	333.725	306.846	401.977	482.714	408.548	345.595
ZNF157_AGCCACATCCTCGAATGACA	ZNF157	248.652	251.319	227.406	254.541	239.129	324.466	246.138	349.072	246.132	289.773	181.063	228.493	242.856	341.302	271.796	286.813	249.295	228.588	346.848	424.788	401.994	358.621	281.667	256.797	260.202	215.851	281.64	191.095	209.453	281.344
ZNF488_CCGCTGCCCCCGAAGACACG	ZNF488	285.385	393.255	320.909	490.425	352.104	304.081	398.51	366.843	352.139	360.607	312.178	369.105	368.119	423.214	334.1	379.92	366.082	319.298	403.557	641.43	431.771	550.331	317.378	315.673	307.303	287.095	259.877	215.977	330.291	310.549
CDHR4_GTGCAGCTGAAGTTCACATG	CDHR4	413.95	490.918	421.337	466.437	504.62	443.38	546.974	450.62	493.482	538.334	431.698	382.625	485.712	538.499	518.085	502.457	518.054	572.076	392.347	305.139	275.716	302.348	439.687	482.278	456.646	445.104	528.715	511.577	496.011	472.151
MBOAT1_TGACACTCATGAAATTGAGA	MBOAT1	268.432	243.506	279.352	227.888	337.041	324.466	285.208	255.14	286.341	330.986	318.422	250.126	403.908	326.133	290.612	306.076	336.885	302.366	302.008	177.703	261.93	220.323	283.453	352	303.856	328.008	367.412	334.416	353.307	370.907
MAP4K5_ATTTGTATGGAATACTGTGG	MAP4K5	291.036	285.175	399.404	283.86	380.348	404.308	428.463	548.36	375.29	484.243	449.537	412.37	347.668	433.833	470.834	420.587	511.316	349.535	464.881	609.571	567.974	603.742	405.762	489.794	356.701	475.436	720.742	464.799	435.017	322.231
SMTNL2_GCAGCCGCCAGCCATAACTC	SMTNL2	221.809	321.636	293.204	305.183	257.959	241.226	266.976	243.716	277.812	284.622	170.36	214.973	250.525	154.724	228.308	240.259	225.339	220.122	222.879	236.465	206.787	227.953	190.159	221.723	207.932	238.423	259.877	326.454	224.413	211.251
AADACL3_ACTTATGCTTAGGTAACTTG	AADACL3	381.455	391.953	382.089	301.185	299.383	387.32	367.254	333.84	402.096	533.183	430.806	392.089	472.93	351.92	407.276	412.025	419.983	351.954	332.341	436.824	299.427	366.251	324.52	290.619	358.424	334.357	391.735	405.082	363.665	377.721
DDX41_GTTACCCTTCTCAAAGCGCG	DDX41	567.945	540.4	519.456	571.719	493.322	545.306	518.323	479.815	565.371	508.713	340.72	454.283	338.72	499.059	424.42	445.737	431.213	488.623	258.487	221.598	170.944	309.025	398.173	393.338	424.48	363.278	209.95	139.34	356.76	440.026
DAPK1_ACAACAACATGGATTGACGT	DAPK1	456.334	554.724	489.443	555.727	404.825	536.813	402.417	492.509	430.121	441.743	368.37	465.099	463.983	445.968	528.956	574.695	499.338	504.346	693.036	850.284	740.021	772.561	466.023	429.666	521.553	463.444	459.585	583.238	629.509	516.933
MGAT4B_GCCCAGAATGGATCTCCGTG	MGAT4B	272.67	169.282	185.85	233.219	154.399	113.818	135.441	139.629	119.41	126.212	159.657	169.004	232.63	160.791	182.312	203.337	173.683	153.602	239.364	237.881	200.17	215.554	146.86	172.868	191.849	172.822	76.8108	109.482	155.363	104.165
FGA_GGTTGATATGAAACGACTGG	FGA	312.228	390.651	375.163	255.874	327.626	390.718	283.906	289.412	510.54	464.925	371.046	333.952	304.209	386.809	348.735	338.182	329.399	430.569	423.339	396.469	415.228	437.785	270.954	266.819	311.324	284.979	346.929	300.577	344.101	432.238
HERPUD1_CCGGTTACACACCCTATGGG	HERPUD1	243.001	175.793	210.091	149.26	207.12	205.552	178.418	192.942	240.039	163.561	222.093	174.412	135.488	188.095	235.417	215.644	204.377	204.399	183.315	248.501	313.765	249.89	127.219	230.491	229.185	212.324	270.118	183.133	239.374	166.47
INTU_GCTCGACTCAGAAACCTCAA	INTU	91.8319	162.771	143.139	99.9508	178.876	132.504	171.906	172.632	159.62	154.546	181.063	159.54	232.63	215.399	140.916	111.3	193.896	193.514	228.814	280.36	216.161	206.016	191.944	192.911	191.849	124.855	171.544	165.218	200.246	179.126
MTNR1B_AAGGTGCAGGAATAGATGCG	MTNR1B	178.013	204.441	211.246	246.545	163.813	144.396	178.418	215.79	170.586	118.485	143.602	159.54	190.45	203.264	180.222	222.066	185.661	189.886	198.481	224.43	251.453	344.314	226.316	176.626	173.468	246.888	161.303	170.194	248.581	214.172
MRPL22_GGCAGTGAGAGACCATAACG	MRPL22	105.96	111.987	88.8847	65.3012	158.164	110.42	119.813	123.127	115.755	92.7275	82.9502	100.05	99.6988	112.25	117.499	119.862	125.022	114.899	85.0634	113.277	114.146	81.0713	104.453	81.4235	104.54	94.5228	29.4442	110.477	93.2179	111.953
GREB1L_GTCGCGGAGTGACGCCATGG	GREB1L	532.625	481.803	566.784	542.4	508.385	530.017	565.207	529.32	386.256	409.546	511.081	493.492	446.088	433.833	456.617	423.263	488.857	518.859	489.939	585.5	606.023	666.692	493.699	479.773	504.321	442.987	273.959	409.063	424.659	444.893
POC5_TCACAGTCATCTCATCCTAA	POC5	310.816	381.536	302.439	314.512	269.256	326.165	290.417	277.988	363.105	361.895	338.936	416.426	355.337	265.457	262.597	316.778	292.716	289.062	320.471	495.586	451.071	411.079	348.178	364.527	361.871	384.44	485.188	447.879	304.972	300.814
PAQR3_GACAACCCGTACATCACCGA	PAQR3	264.193	342.471	346.304	285.193	331.392	353.345	345.115	332.57	241.258	275.607	263.122	287.983	249.247	379.224	248.38	324.804	274	303.575	416.745	435.408	575.694	409.171	348.178	382.064	321.088	359.046	276.519	429.964	242.827	302.761
ZNF217_TGGGTGGTACTGCCATCCGG	ZNF217	94.6575	123.706	122.361	138.598	103.56	169.877	122.418	154.861	68.2345	94.0153	118.628	104.106	134.21	133.487	98.2646	136.985	101.814	74.9867	52.0931	26.1953	38.0488	36.2436	119.184	175.374	131.537	191.867	71.6901	102.515	127.743	39.9138
ZNF608_CCAAGCGGGATAAGGATGCG	ZNF608	170.949	233.088	203.165	135.933	144.984	154.588	145.86	199.288	222.981	142.955	156.981	214.973	208.345	259.389	240.435	187.819	256.781	197.142	193.865	229.386	200.721	182.172	219.174	121.509	184.956	173.527	222.751	297.591	186.436	244.351
ZSCAN22_CAGCCTCAGAGTGAGCAATG	ZSCAN22	166.71	165.376	163.917	159.921	188.291	157.986	140.651	144.706	152.309	164.849	259.554	210.917	163.608	177.477	139.243	190.495	144.486	168.115	189.909	133.808	233.807	135.437	170.072	205.438	184.956	272.988	256.036	173.18	222.112	109.033
SRGAP2B_TCGATTTGTACAAGTCAGCG	SRGAP2B	473.287	459.666	551.778	461.106	446.249	516.427	471.44	448.081	478.86	467.501	432.59	469.155	530.449	442.934	485.051	483.193	563.721	633.758	360.036	349.742	301.082	515.995	623.596	677.694	578.419	615.809	555.598	356.313	437.319	399.138
HEXIM1_GGGTGCCCGAGGAGGACAGT	HEXIM1	87.5935	27.3456	62.3347	50.6418	96.0284	91.7338	98.9763	67.2757	28.0249	34.7728	133.791	73.0097	126.541	81.9124	67.3217	47.6237	53.9016	35.0744	133.2	128.144	127.932	98.2393	125.433	28.8114	93.0525	35.9751	58.8883	51.7549	82.8604	88.5892
ZNF99_CCCTACAAATATGAAGAATG	ZNF99	243.001	324.24	320.909	165.252	363.401	261.611	197.953	241.177	176.679	133.94	141.818	170.356	138.044	107.7	89.4835	136.985	95.825	106.433	32.3109	72.214	34.7402	66.7646	149.984	142.804	171.745	160.124	47.3667	22.8916	42.581	92.4833
FAM78B_CAGATGGGGTGAGCTACCCT	FAM78B	436.555	433.622	374.008	409.132	433.069	372.032	421.952	563.592	445.961	432.728	473.619	419.13	313.156	276.075	389.295	388.481	363.836	350.744	270.357	310.803	313.765	405.356	410.672	358.264	399.781	442.987	345.649	439.917	283.106	359.225
PCDHB11_GAGTAGCGAGTAGTTGACCT	PCDHB11	302.339	205.743	280.506	202.567	180.759	200.455	181.022	114.242	235.165	261.44	242.607	179.82	235.187	298.829	303.993	245.61	300.951	255.197	242.662	399.301	363.393	386.281	174.536	217.965	200.465	253.942	209.95	281.666	378.626	264.794
NKX3-2_AACAAGAAAGAGGAGCGCGG	NKX3-2	158.233	177.095	140.83	122.606	176.993	156.287	160.185	185.325	119.41	166.137	172.144	181.172	112.481	138.038	194.439	231.697	184.912	228.588	168.808	106.905	129.035	80.1175	154.002	139.046	154.513	183.402	185.626	105.5	220.961	202.49
ACOT9_AAGAGGAGCTCTTTAGACAA	ACOT9	565.119	666.711	705.306	525.075	596.882	613.257	559.998	647.37	703.059	771.441	751.904	724.689	599.471	675.019	675.308	586.467	568.213	603.522	689.08	670.457	722.375	563.684	746.798	673.936	662.855	754.066	765.548	777.319	669.788	744.734
ACVR1C_ATTGTCCTTTGAACCAACAG	ACVR1C	261.368	359.399	234.332	238.549	254.193	241.226	230.511	228.483	179.116	226.667	270.257	232.549	268.42	174.443	283.922	211.899	282.235	269.71	259.806	350.45	229.395	292.81	275.418	303.146	259.628	241.95	311.084	280.671	246.279	300.814
SPINK6_TTACTTTGGTAGGTTGACTG	SPINK6	599.026	556.026	473.282	590.376	578.053	552.102	579.532	564.862	594.615	576.971	601.166	494.844	612.253	505.127	637.675	506.203	603.398	580.542	439.824	323.547	405.854	481.659	572.709	546.164	472.729	524.813	705.38	577.266	561.609	548.085
ARHGEF35_CCTGGGAAGCGAAGAAGAGG	ARHGEF35	340.484	296.895	297.822	371.817	327.626	343.152	388.091	371.92	168.149	157.122	209.605	256.886	256.916	226.018	135.898	128.424	133.257	141.507	119.353	72.922	125.726	114.454	208.014	216.712	238.375	200.332	194.587	141.331	124.291	173.284
CSN1S1_TACTAGGAATGAGTCTACTC	CSN1S1	203.443	154.958	183.541	222.557	195.823	191.961	204.464	220.867	232.728	186.743	206.038	201.453	260.751	247.254	263.015	303.936	340.628	212.865	160.895	150.8	172.047	205.063	200.872	172.868	195.87	138.963	250.915	260.765	136.95	156.735
HIST1H2BG_TAGCACCTTGTACACATACA	HIST1H2BG	512.846	462.27	657.978	559.725	497.088	428.091	531.347	489.97	547.094	540.91	523.568	632.751	476.765	567.32	519.339	573.09	571.956	633.758	578.299	825.505	735.61	927.074	457.988	549.922	596.225	589.709	496.71	615.087	532.838	614.284
INPP5J_GGTCCCCGAACCAGAACACG	INPP5J	387.107	367.212	405.176	367.819	465.079	355.044	352.929	361.765	304.618	328.41	446.861	377.217	412.855	570.353	387.623	372.963	384.049	410.008	363.992	313.635	425.705	319.516	383.442	427.16	352.106	278.631	445.503	487.69	346.402	370.907
SLC22A1_GTATGACTGGCAGTTCAACC	SLC22A1	122.913	139.332	263.191	227.888	146.867	168.179	144.558	203.096	209.577	142.955	273.825	254.182	107.368	145.622	158.896	187.284	169.191	237.055	215.626	276.82	289.502	401.541	149.984	169.11	172.894	217.261	175.385	104.505	247.43	243.377
ACER3_TAAGCCATGGATAAACCCTG	ACER3	200.617	114.591	223.943	253.209	229.715	244.623	238.325	225.945	187.645	235.682	225.66	221.733	150.826	203.264	222.873	248.821	220.098	210.446	271.675	250.625	282.333	314.747	202.658	180.384	178.063	187.635	239.394	210.005	256.637	176.205
SFXN1_TCTGTTGGTGTAATTGACGA	SFXN1	248.652	356.794	285.124	202.567	318.212	278.599	329.487	236.1	258.316	265.304	213.173	229.845	322.104	216.916	271.796	227.952	297.956	257.616	276.291	157.88	281.23	159.281	249.081	236.755	164.278	191.162	195.868	212.991	333.743	232.668
VGLL1_ATAGCATGTCTCCAAATCAG	VGLL1	582.073	572.955	684.528	609.034	587.468	552.102	623.811	635.946	620.203	553.789	506.621	551.629	641.651	555.184	484.215	517.975	497.092	524.907	578.959	543.021	506.214	495.965	648.594	612.556	649.644	540.332	682.336	584.233	557.006	601.628
CMPK2_GAGGCACCACGCCCGCACTT	CMPK2	203.443	187.512	158.146	155.923	160.047	169.877	264.371	242.446	281.467	258.864	265.798	301.503	249.247	342.819	217.855	264.874	202.88	260.034	263.763	286.732	240.976	334.777	189.266	195.417	202.762	237.012	181.786	193.086	223.263	215.145
PDIA2_ACGCTGAGGGCATTGCCGAG	PDIA2	483.177	483.105	490.598	649.014	438.718	489.247	588.649	548.36	506.885	551.213	543.19	494.844	549.621	605.242	593.769	627.135	702.218	609.569	600.06	634.35	617.603	613.28	617.793	682.705	564.633	584.772	572.241	533.474	424.659	519.853
ALG12_ACCTGATGTTCTACTGCACG	ALG12	372.979	233.088	332.452	375.815	291.851	285.394	309.952	346.533	252.224	363.183	214.065	378.569	239.021	435.349	330.755	454.298	312.18	489.832	291.458	235.757	169.289	289.949	362.463	345.737	333.151	263.817	323.886	450.865	279.654	372.854
CFL1_TTGCATCATAGAGGGCATAG	CFL1	452.095	454.457	436.343	433.12	461.313	463.765	405.022	538.205	360.668	466.213	220.309	308.263	241.578	244.22	239.598	250.426	224.59	238.264	105.505	126.728	137.306	108.731	254.438	304.399	232.057	267.344	99.8541	79.6229	180.682	224.88
PTGIR_GCGCGCATAGGCCACGAACA	PTGIR	296.688	256.527	280.506	233.219	259.841	324.466	257.859	274.18	330.206	314.243	225.66	246.07	308.044	335.234	185.239	239.189	220.098	197.142	307.943	326.379	233.807	298.533	333.448	329.452	348.085	271.577	297.002	221.949	307.274	313.47
IL21_CAAATACAGGAAACAATGAA	IL21	415.363	371.118	352.076	191.906	378.465	404.308	335.999	482.354	372.853	498.41	471.835	497.548	462.705	414.113	490.905	455.368	550.994	505.555	547.967	712.936	549.777	656.2	481.2	503.573	565.207	505.062	449.343	609.115	425.81	464.363
ARMC5_CTTCCGTACAGCAATCGGCT	ARMC5	145.518	195.325	273.58	187.908	225.949	224.238	194.046	200.558	222.981	213.788	321.99	239.31	255.638	233.602	251.725	169.091	212.612	134.25	287.501	92.7454	354.019	85.8402	213.371	154.078	166.001	134.025	102.414	156.26	247.43	191.781
TBRG4_CATGACGGTCACTAATGTGT	TBRG4	518.497	583.372	584.1	595.707	647.721	580.981	405.022	538.205	434.995	406.971	512.864	601.654	437.141	627.995	401.84	461.79	387.043	483.785	438.505	378.769	433.425	487.381	524.946	460.983	499.152	555.145	518.473	483.709	515.576	591.893
CHURC1_ACATCGCGACGCAGTCAACA	CHURC1	428.078	425.809	470.974	386.477	382.231	387.32	397.208	429.041	411.844	457.198	488.782	474.563	541.952	590.073	508.885	515.299	445.437	494.67	607.973	460.895	585.069	439.692	486.11	519.858	464.688	442.282	459.585	579.257	458.034	409.847
LSM6_TTTGCTTTAAGAAGTCACTA	LSM6	175.187	190.117	175.461	167.917	150.633	154.588	112	134.551	159.62	181.591	154.305	223.085	109.924	84.9462	125.444	150.363	149.727	116.108	81.107	80.7097	63.966	62.9495	95.5258	92.6976	95.35	148.133	49.927	55.7361	89.7654	81.7747
NUP107_CGGCAGCTGACTTCTTACGT	NUP107	96.0703	72.9215	109.663	74.6299	201.471	200.455	109.395	152.322	49.9574	82.4244	69.5712	55.4333	69.0222	59.159	49.3414	80.2647	76.3606	77.4056	49.4555	75.0459	75.5461	64.857	104.9	67.6442	100.52	76.1826	39.6856	8.95758	46.0335	15.5761
SUPT20HL2_CATGCAGACTTTAGCCCCTG	SUPT20HL2	220.396	253.923	251.648	218.559	267.373	249.72	328.185	293.22	271.719	291.061	366.587	310.967	290.149	348.886	318.21	256.312	285.978	305.994	271.675	286.732	289.502	370.066	258.902	244.271	265.372	304.73	427.58	310.529	209.453	365.066
MYPOP_GGAGAAAGCGTCCTCCGCGG	MYPOP	370.153	390.651	368.237	375.815	436.835	424.694	451.905	422.694	337.517	309.092	384.425	360.992	405.186	286.694	282.668	330.155	321.164	318.089	325.087	374.522	342.99	331.915	333.001	333.21	233.78	380.913	395.576	350.341	250.883	352.41
ATP5O_CTGATCAGATTGGTAGTGAG	ATP5O	494.479	416.694	505.604	529.073	440.601	436.585	449.3	449.351	502.011	564.092	600.274	493.492	533.005	508.161	627.639	615.898	614.628	533.373	1020.1	859.488	987.062	809.759	477.183	533.637	553.72	565.021	631.129	680.776	446.525	485.781
RAB3D_GTCCGCGTATCGGAACAGGA	RAB3D	185.077	181.002	185.85	230.553	182.642	173.275	174.511	246.254	207.14	220.228	220.309	247.422	205.788	224.501	136.316	164.275	166.945	142.717	122.65	158.588	105.323	131.622	83.0271	135.288	117.752	175.643	172.824	193.086	179.531	144.079
NUDT3_ACCCGCACCTACGACGGCGA	NUDT3	559.468	518.263	458.276	638.353	419.889	550.403	539.16	418.886	466.675	418.561	493.242	452.931	292.705	439.9	507.631	558.107	502.333	441.454	565.771	482.134	544.263	472.121	439.24	362.022	481.345	373.859	698.979	578.262	653.676	551.979
ANKLE2_GAAGCGTATCCGTTACGTGG	ANKLE2	89.0063	132.821	125.824	105.282	129.921	124.011	175.813	119.319	60.9236	57.9547	49.0566	41.913	39.6239	59.159	61.8858	52.9747	68.8742	39.9123	52.7525	12.7436	2.75716	2.86134	76.7778	41.3381	72.3741	41.6183	10.2414	1.99057	23.0168	33.0993
NUPR1_AGGGCTGGGGCGGTTGGTGT	NUPR1	187.902	184.908	176.615	197.236	263.607	217.443	169.302	106.626	199.83	175.152	162.333	193.341	245.412	229.051	225.8	211.364	174.432	165.696	211.01	231.51	299.979	214.6	202.211	206.691	232.631	177.054	209.95	224.935	193.341	202.49
ANKRD54_AGGACGTGCAAGTAGCGCAG	ANKRD54	146.931	214.858	176.615	191.906	192.057	200.455	274.79	189.133	146.217	180.303	149.846	187.932	153.383	113.767	221.618	184.609	276.994	164.487	305.965	275.404	262.481	305.209	191.944	241.765	128.665	161.535	211.23	260.765	231.319	215.145
DNAAF2_AGGACTTGAGCAGGCACGCG	DNAAF2	104.547	111.987	151.219	166.585	114.857	67.951	98.9763	101.548	135.25	139.091	127.547	125.739	139.323	172.926	193.602	110.765	130.262	110.061	151.663	157.172	157.158	244.168	100.882	96.4556	104.54	105.104	130.578	124.411	140.402	158.682
SAMD12_GCAGGGTGATCAATACCCCG	SAMD12	172.361	162.771	190.467	165.252	195.823	224.238	248.743	208.174	160.838	191.894	256.878	235.254	218.57	248.771	240.017	206.548	239.563	143.926	230.792	336.999	360.085	241.306	195.515	189.153	155.087	223.61	273.959	211.996	196.793	229.748
USP7_GGCAACCTTTCAGTTCACTG	USP7	370.153	453.155	552.932	554.394	482.025	434.886	533.951	415.078	392.348	287.198	424.563	388.033	508.719	364.055	554.882	620.714	543.508	283.014	544.01	373.814	486.914	303.302	336.126	360.769	310.175	458.506	654.172	299.581	451.129	431.264
KPNA5_TACCTCTGGAATGGGTACAG	KPNA5	261.368	432.32	364.774	353.16	355.87	339.755	371.161	319.877	326.551	338.713	371.938	263.646	406.464	467.204	386.786	321.059	377.311	333.812	360.695	395.761	360.636	421.571	336.126	418.392	350.957	384.44	393.015	371.242	371.721	275.503
TRPT1_TGCTGAAGATGTGCAGCGCG	TRPT1	189.315	166.678	158.146	233.219	144.984	134.203	134.139	115.511	132.814	99.1669	173.928	150.076	207.067	128.936	158.478	145.012	175.18	189.886	149.685	80.0018	83.8176	30.5209	90.1692	96.4556	123.496	140.373	136.979	200.053	87.4637	116.821
C11orf73_GCAAACAGCTGCACAGCAAG	C11orf73	276.908	265.643	307.056	238.549	203.354	215.744	328.185	239.908	187.645	257.576	315.746	236.606	198.119	210.849	247.543	276.646	206.623	235.845	152.323	424.788	170.944	471.167	228.994	238.007	176.915	213.029	252.196	297.591	299.218	224.88
KDM8_AGACCTGAAGTTGGACCTCG	KDM8	476.113	421.903	460.585	581.047	448.132	368.634	582.137	476.007	567.808	488.107	536.947	471.859	504.885	489.958	559.063	535.633	582.437	628.921	568.408	373.106	673.849	455.907	495.484	328.2	498.003	495.892	332.847	422.997	494.861	539.324
LOXHD1_ATAATCGAGAAGTTTAGGGT	LOXHD1	283.972	306.01	271.272	263.87	308.797	251.419	372.464	357.957	292.433	309.092	325.557	287.983	328.495	203.264	357.516	317.313	281.486	370.096	358.058	333.459	323.69	304.256	370.944	343.232	352.68	308.963	362.291	401.101	334.894	314.443
PCDHB16_AGGCCAGGATCATTTCCCAG	PCDHB16	193.553	167.98	160.454	166.585	220.3	203.853	208.371	180.248	170.586	209.925	218.525	197.397	162.33	131.97	121.263	225.276	193.147	223.751	154.301	143.012	124.624	92.5166	259.348	194.164	153.364	284.274	101.134	137.35	187.587	194.702
SLC35F2_CATGACAGAGCCATCAACAC	SLC35F2	418.188	359.399	340.532	381.146	321.977	339.755	351.626	271.641	237.602	405.683	361.235	375.865	374.509	423.214	558.645	547.405	533.027	484.995	563.133	447.443	460.997	403.449	262.919	380.812	313.621	333.651	271.398	402.096	390.134	377.721
GRAP2_GCTTCCGGTTCATCGAAGGT	GRAP2	238.763	210.951	217.017	229.221	372.816	355.044	311.254	234.83	222.981	264.016	260.446	285.279	301.653	354.954	281.831	258.987	234.322	284.224	259.147	222.306	208.993	255.613	313.807	236.755	244.119	279.336	318.765	352.331	302.671	335.86
Non-Targeting_ATAGCCGCCGCTCATTACTT	Non-Targeting	620.218	669.315	805.734	667.672	771.993	654.028	652.462	690.528	587.304	480.38	46.3808	43.265	31.9547	65.2266	4.18147	5.35098	7.48633	14.5136	4.61584	3.5399	5.51431	3.81512	5.35659	2.50534	5.74398	3.52697	51.2072	67.6795	364.816	348.516
HAS3_GTGCATTGCCGCATACCAGG	HAS3	929.621	1069.08	924.632	868.906	826.597	861.278	864.74	808.577	777.386	960.759	1002.54	847.724	994.431	946.544	1019.03	1040.23	920.819	1026.83	757.658	848.16	661.166	932.796	811.523	918.207	884.573	954.398	1058.71	1012.21	1001.23	908.283
LOC100130451_CTGTCCATCATACCCCAGAA	LOC100130451	601.852	505.242	524.074	535.736	465.079	460.368	522.23	658.794	572.682	544.774	569.057	651.679	631.426	805.472	841.731	656.565	687.994	584.17	860.525	980.553	794.061	908.952	503.966	556.185	635.858	573.485	779.63	576.271	654.827	667.827
Non-Targeting_GTGATAATGATGTATTCTCG	Non-Targeting	502.956	455.759	472.128	349.162	478.259	482.452	455.812	542.013	488.608	516.44	510.189	623.287	426.915	662.884	610.495	626.065	631.098	535.792	771.505	715.768	752.153	661.923	582.083	536.143	631.838	550.207	469.826	515.559	588.078	551.979
GRIA3_TACCTCTATGACACAGAACG	GRIA3	326.356	251.319	447.887	442.449	310.68	402.609	298.231	360.496	337.517	278.182	301.475	289.335	337.442	339.785	427.765	345.673	390.786	358.001	319.153	344.786	238.218	232.722	354.874	324.442	313.047	320.954	440.382	347.355	498.313	469.231
DENND2D_TTTGTACTCCAACCATGAAG	DENND2D	291.036	265.643	319.754	235.884	267.373	281.996	229.208	251.332	251.005	206.061	197.118	213.621	350.224	253.322	246.707	151.968	229.83	187.467	156.279	154.34	138.961	237.491	281.221	295.63	279.157	281.452	181.786	164.222	235.922	132.397
WIPI1_AACGTGTATCACTTCAAGAA	WIPI1	291.036	244.808	212.4	177.246	156.281	229.334	195.348	177.709	252.224	270.455	249.743	250.126	125.263	198.714	227.89	229.557	276.994	221.332	213.648	234.341	165.981	186.941	267.829	270.577	244.119	239.129	222.751	339.393	195.643	243.377
GCK_AGGTATGAGAAGCTCATAGG	GCK	337.659	316.427	356.693	319.843	374.699	395.814	381.58	317.338	378.945	345.152	390.669	365.049	311.878	345.853	314.029	403.999	339.879	401.542	312.559	265.493	323.69	269.92	404.869	486.036	335.448	419.004	334.127	292.614	410.849	392.324
PRM2_CCTGAGCGAACGCTCGCACG	PRM2	456.334	457.061	468.665	491.758	451.898	404.308	524.835	423.964	519.069	453.334	478.079	456.987	543.23	447.485	440.309	444.131	440.945	455.967	511.04	475.055	750.498	544.608	451.293	430.918	541.657	482.49	505.671	378.209	443.073	553.926
NPY1R_TGATAATCAACCCTCGAGGG	NPY1R	124.326	101.569	129.287	101.284	62.136	71.3485	98.9763	130.743	121.847	97.879	137.358	85.178	104.812	91.0138	92.8287	110.765	77.1092	101.595	51.4337	142.304	19.3001	91.5628	72.7603	101.466	143.599	132.614	172.824	203.038	66.7486	74.9601
SLCO1B3_TCAATGTATGAAATCCCCAA	SLCO1B3	100.309	147.145	108.509	102.616	182.642	154.588	136.744	186.595	141.343	158.409	156.981	121.683	175.112	121.352	133.389	146.617	165.448	160.859	174.083	158.588	185.281	180.264	126.773	129.025	152.215	187.635	231.713	134.364	193.341	129.477
Non-Targeting_TATACTGCGGATCAATCTGA	Non-Targeting	529.799	628.948	382.089	490.425	457.547	373.73	431.068	450.62	571.464	726.365	477.187	516.476	524.058	637.097	560.736	592.889	553.24	476.528	643.581	921.79	800.678	806.898	561.995	548.669	546.252	654.606	623.448	633.002	446.525	580.211
ANKRD20A3_TGAGGTGCTCTCACTATACA	ANKRD20A3	416.775	467.479	385.552	337.167	468.844	456.97	376.37	416.348	328.988	387.652	325.557	385.329	270.976	283.66	409.366	371.893	357.098	321.717	489.939	716.476	553.637	683.86	357.106	303.146	357.85	301.203	176.665	195.076	384.38	336.834
PRRC2C_CATCATTCGAGGATCCATGT	PRRC2C	306.577	158.865	173.152	221.224	265.49	183.468	173.209	163.746	165.712	164.849	135.575	151.428	69.0222	91.0138	236.253	191.565	241.809	197.142	87.701	73.6299	59.0032	65.8108	213.371	120.256	257.905	104.398	133.139	152.279	170.324	113.9
TMEM87B_CTAACCAGAGCCCGAGCTCA	TMEM87B	221.809	188.815	215.863	214.561	289.968	295.587	235.72	229.753	242.476	208.637	231.012	250.126	334.886	332.2	287.685	243.47	247.049	227.379	288.161	193.987	308.25	290.903	260.687	244.271	261.351	274.398	337.968	211.996	346.402	217.092
FGF12_TGGTACCATTGATGGGACCA	FGF12	238.763	273.456	247.03	202.567	210.886	200.455	246.138	222.137	303.4	248.561	233.688	243.366	256.916	268.491	290.612	245.075	325.655	260.034	249.915	239.297	245.938	204.109	362.909	301.893	195.87	223.61	390.455	328.445	268.145	243.377
TAGAP_CGCTTGAAAGTAGCTTCCGG	TAGAP	104.547	96.3605	124.669	114.61	105.443	59.4571	121.116	78.6998	101.133	113.334	88.3019	108.163	129.097	151.69	82.375	111.3	89.0873	101.595	85.7228	20.5314	109.183	63.9032	128.112	65.1388	74.0973	97.3444	72.9703	78.6277	27.6201	110.006
TCP10L_CAAAGAGGGCACCCACCCAG	TCP10L	234.524	231.786	173.152	129.27	235.364	202.154	191.441	200.558	325.332	302.652	197.118	258.238	237.743	235.119	218.273	156.784	203.628	222.541	163.533	193.279	176.458	175.495	249.974	281.851	296.964	239.129	195.868	265.742	234.771	202.49
TEX37_GGTATATGTCTAAATCCACA	TEX37	300.926	324.24	316.291	291.856	297.5	263.31	321.673	382.075	338.735	392.804	280.961	308.263	352.78	291.244	333.263	341.928	274.748	295.109	305.965	346.202	253.658	366.251	366.034	281.851	276.285	348.465	290.601	274.699	359.062	302.761
PDE8B_CGGGGCATTTACCTTCACGC	PDE8B	446.444	498.731	515.993	411.797	493.322	366.935	391.998	441.735	534.91	570.531	469.159	474.563	553.456	459.62	557.39	499.782	565.218	595.056	555.22	523.905	457.688	568.453	482.093	478.52	489.961	498.714	544.077	690.729	562.76	507.198
SPATA5_TTAGCTGTAAGGATAACTCC	SPATA5	365.915	210.951	282.815	241.215	393.528	329.562	347.719	237.369	311.929	168.712	237.256	219.029	157.217	226.018	300.648	227.952	234.322	163.277	212.329	310.095	125.726	181.218	150.877	194.164	198.742	198.216	285.48	243.845	254.335	230.721
LY6G6D_TTGGTGAATCAAGGTCACTG	LY6G6D	223.222	255.225	252.802	342.498	271.139	214.046	380.277	582.633	253.442	168.712	235.472	223.085	164.886	256.356	148.442	249.891	208.12	179	133.859	152.216	189.692	221.277	191.052	196.669	174.043	217.967	199.708	154.269	151.911	286.211
HHEX_AATATCTCTCTCCGCCCGAG	HHEX	356.025	351.586	367.082	318.51	453.781	446.778	447.998	441.735	399.659	369.622	440.617	287.983	455.035	222.984	395.567	287.348	522.546	245.521	478.07	437.532	497.943	360.529	330.323	355.758	328.556	294.855	322.606	411.053	490.257	351.436
LMO3_ATTAGCTTTAGTGTACAGGG	LMO3	443.619	433.622	548.315	438.451	453.781	402.609	626.416	443.004	589.741	576.971	491.458	521.884	467.817	391.359	474.179	447.877	455.169	396.704	340.913	326.379	300.53	227	551.729	462.235	478.473	519.17	579.922	487.69	681.296	639.595
KLHL33_GACAACCATCCCGAGCAGTG	KLHL33	218.984	263.038	206.628	226.555	254.193	224.238	205.767	215.79	220.544	203.485	108.816	146.019	155.939	154.724	171.859	192.635	190.901	216.494	281.566	210.27	160.467	185.987	214.264	176.626	240.098	217.261	170.264	191.095	153.062	202.49
IL12B_TGAGGACCACCATTTCTCCA	IL12B	459.159	376.327	386.706	453.11	502.737	373.73	329.487	299.567	532.473	432.728	495.026	466.451	290.149	409.562	406.439	361.726	411	383.4	400.919	408.505	376.076	476.89	487.003	559.943	479.048	445.104	413.498	328.445	341.799	384.536
METTL23_GATGTGTTCTTTGAACCAGA	METTL23	305.164	270.851	277.043	197.236	248.544	242.925	341.208	215.79	232.728	276.894	355.883	344.768	299.096	313.998	329.918	302.865	337.634	252.778	240.683	316.467	283.987	345.268	262.473	207.943	241.821	222.905	322.606	244.841	327.989	313.47
FARP1_ACCTCAGCAAGACGCACTAG	FARP1	200.617	341.168	333.606	370.484	286.202	304.081	346.417	272.911	285.123	296.213	272.933	270.406	263.307	257.873	353.335	305.006	342.125	274.548	305.965	318.591	301.082	316.655	322.734	232.997	290.071	347.054	444.223	445.888	342.95	195.675
LRRC16B_GAGTTGGGGGATGTATCTCG	LRRC16B	185.077	210.951	190.467	203.9	156.281	215.744	203.162	189.133	179.116	112.046	184.631	239.31	186.616	153.207	216.182	185.144	187.907	209.237	168.808	195.403	168.738	214.6	164.269	221.723	157.959	188.34	158.742	211.996	134.648	221.96
FREM1_GTGATGTTGAGATCATACAC	FREM1	132.803	87.2454	114.28	86.624	90.3796	79.8424	123.72	135.821	109.663	159.697	143.602	106.811	61.3531	104.666	119.172	113.976	123.524	136.669	123.968	89.9135	167.635	118.269	148.199	199.175	130.388	122.739	140.82	177.161	120.838	121.689
OR1J4_TGAGCATGAGAGCTTGAGTA	OR1J4	187.902	201.836	221.635	134.6	165.696	140.998	225.301	205.635	177.897	166.137	187.307	177.116	182.781	210.849	180.64	168.021	140.743	197.142	172.105	218.058	179.215	164.05	276.311	165.352	219.994	232.78	147.221	149.293	210.603	220.986
MEGF11_TGCCCTGGCTACTATGAGAG	MEGF11	226.048	191.419	275.889	277.197	169.462	217.443	235.72	199.288	198.611	261.44	204.254	220.381	145.714	200.23	226.636	168.556	226.087	182.629	249.915	269.032	289.502	202.201	240.6	230.491	219.994	276.514	149.781	188.109	193.341	222.933
MAK_TGATCGATTATATCCGGCAG	MAK	356.025	464.874	364.774	367.819	401.06	450.175	326.882	412.54	318.021	332.273	270.257	333.952	223.683	320.065	330.755	330.155	323.41	395.494	280.248	266.201	222.227	392.003	283.453	304.399	268.244	340.705	302.123	235.883	261.24	273.556
NXF1_ATCATGAGCAAACGATACGA	NXF1	421.014	338.564	340.532	275.864	374.699	353.345	325.58	313.53	157.183	142.955	130.223	129.795	111.202	209.332	112.9	117.186	114.541	137.879	46.1584	22.6554	19.8515	7.63024	139.271	217.965	182.084	158.714	46.0865	30.8539	79.4079	44.7814
VGLL1_TGCTGGAGGAGACTTAGGAG	VGLL1	161.059	91.1519	116.589	158.589	124.272	142.697	134.139	166.285	99.9148	124.924	140.034	113.571	102.255	189.612	125.026	115.581	104.06	124.575	71.2159	142.304	85.4719	61.9957	133.468	67.6442	95.9244	105.104	189.467	103.51	128.894	123.636
OR6C6_AGGTAAAACTCAGTAACTCC	OR6C6	161.059	110.684	122.361	195.904	156.281	129.107	164.092	134.551	187.645	177.728	143.602	143.315	259.472	195.68	132.135	126.818	118.284	182.629	133.859	56.6384	120.212	65.8108	144.182	139.046	157.959	150.954	218.911	202.043	102.425	112.927
RNPEP_GCTGCCAAGGAGGAGTACAA	RNPEP	316.467	201.836	202.011	251.876	197.705	237.828	266.976	271.641	226.636	173.864	213.173	259.59	217.292	185.061	188.584	232.233	257.53	275.757	223.539	226.554	218.918	252.752	323.627	296.883	252.161	260.29	232.993	382.19	266.995	202.49
GCM2_ACTCTCGGAATTGGTCAAAG	GCM2	223.222	204.441	197.393	218.559	169.462	169.877	197.953	137.09	157.183	222.803	179.28	212.269	222.405	289.727	154.296	153.038	134.754	176.582	134.519	186.199	141.166	176.449	137.486	215.459	210.804	220.788	204.829	249.817	220.961	243.377
KLHDC3_GGCGGGCGGAATGACACCGA	KLHDC3	152.582	162.771	120.052	109.28	169.462	157.986	140.651	109.164	104.789	121.061	92.7616	87.8821	126.541	72.8111	102.028	86.6859	119.033	114.899	172.105	167.791	169.841	202.201	128.112	60.1282	70.6509	112.863	161.303	144.317	127.743	110.006
CYB5R4_TGTCCTAGGGCTAAGCCATG	CYB5R4	307.99	364.607	376.317	414.463	318.212	368.634	270.883	295.759	321.677	401.819	407.616	325.84	369.397	341.302	324.482	307.681	360.093	304.785	316.515	384.433	321.485	248.936	315.592	265.566	335.448	308.963	418.619	361.289	388.983	282.317
NATD1_GGCGATGCCACGCCCACGGT	NATD1	117.262	102.871	123.515	149.26	54.6044	195.359	88.5578	112.972	63.3606	94.0153	77.5986	87.8821	129.097	107.7	59.7951	72.2382	83.0983	84.6624	60.006	125.312	146.129	132.575	52.6731	71.4022	89.6061	79.7095	147.221	86.5899	63.2961	137.265
STRADB_GTGTCCTACAGGATTTACAT	STRADB	498.718	583.372	473.282	414.463	480.142	463.765	440.184	592.788	367.979	359.319	534.271	552.981	636.538	450.518	518.085	461.79	522.546	492.251	555.22	709.396	631.389	750.625	460.667	483.531	394.037	423.942	615.767	505.606	525.933	623.045
GAL3ST1_AAGAACACGATGTTGCGCCG	GAL3ST1	289.624	298.197	241.259	354.492	248.544	248.021	355.533	332.57	269.283	222.803	302.367	278.519	201.954	282.143	259.251	341.393	231.328	308.413	239.364	277.528	297.773	261.336	216.942	184.142	205.06	213.734	222.751	231.902	264.693	376.748
OR5AK2_ACATGATTACAGTATAGTGA	OR5AK2	658.364	842.504	592.18	481.097	619.477	699.895	582.137	698.144	729.865	725.077	710.875	704.409	713.23	659.85	786.535	718.637	853.442	771.637	814.367	749.043	768.144	638.079	701.267	744.086	761.652	755.477	805.234	977.372	728.481	739.866
ZNF479_GGTGAATATGAGGTGCACAA	ZNF479	235.937	231.786	195.085	210.563	154.399	152.89	191.441	198.019	143.78	141.667	171.252	113.571	221.127	270.008	248.38	200.662	327.901	224.96	253.871	119.649	203.478	164.05	177.66	186.648	239.524	263.817	259.877	353.327	191.039	274.529
HOXB3_TGCGTGGCGGCCTGAAATGG	HOXB3	378.63	376.327	399.404	471.768	295.617	334.658	467.533	347.803	254.661	320.682	390.669	388.033	231.352	330.684	359.607	311.962	306.94	304.785	427.295	329.919	368.908	330.962	352.642	303.146	372.784	351.286	322.606	291.619	256.637	299.841
DHTKD1_TCATGCCAACAAACCGCAGG	DHTKD1	214.745	130.217	244.722	210.563	259.841	214.046	207.069	181.517	313.148	239.546	246.175	237.958	168.721	174.443	240.853	212.969	256.033	229.798	297.392	244.961	299.427	331.915	203.55	274.335	276.86	238.423	166.423	250.812	200.246	313.47
FBRSL1_TCAGGCAAGAGCTGAACACG	FBRSL1	196.379	184.908	148.911	221.224	118.623	151.191	214.883	187.864	109.663	185.455	213.173	206.861	155.939	182.028	127.535	150.363	112.295	113.689	113.418	65.8422	71.1347	74.3948	142.842	155.331	143.025	141.784	65.2892	126.401	135.799	130.45
ANKRD22_GTACGAATGCTACTTGATGC	ANKRD22	166.71	154.958	202.011	249.211	233.481	151.191	244.836	206.904	157.183	154.546	201.578	167.652	185.337	162.308	153.46	181.933	198.388	172.953	177.38	128.852	137.858	142.113	200.872	176.626	222.866	181.992	171.544	173.18	184.134	207.357
MRPS18B_GGCGAGAACCATATCGCTCC	MRPS18B	142.693	200.534	211.246	290.524	186.408	176.672	230.511	128.205	174.242	140.379	241.715	175.764	144.435	89.4969	122.517	110.23	139.246	119.737	116.715	123.897	122.969	136.39	111.149	95.2029	162.555	122.033	96.0135	36.8256	166.872	99.2978
P2RY1_ACTTCGCAGGTACTCGTCTG	P2RY1	214.745	238.297	236.641	266.536	165.696	212.347	199.255	194.211	169.368	172.576	249.743	219.029	210.901	172.926	217.437	233.838	187.158	197.142	266.4	215.226	193.001	273.735	171.857	227.986	240.673	210.913	316.205	250.812	194.492	183.02
IZUMO4_CTGGAGCGACGACACGATGA	IZUMO4	638.585	635.459	570.248	518.412	834.129	657.426	764.462	590.249	628.732	537.047	574.408	494.844	692.779	597.657	641.438	644.793	575.699	689.394	653.472	789.398	633.043	782.099	584.761	622.577	599.671	707.51	428.861	539.445	563.911	800.224
FAM180B_GAACTAGCGTCCACACACCC	FAM180B	511.433	406.277	459.43	431.788	461.313	490.946	545.672	465.852	465.457	399.243	455.78	432.65	483.156	577.938	414.802	465	384.797	388.237	484.004	329.211	410.265	399.634	514.233	403.36	601.395	485.311	506.952	347.355	586.928	364.092
CD1E_TCTTAAATATGGCATATCAA	CD1E	292.449	300.801	227.406	122.606	316.329	314.273	225.301	343.994	299.744	296.213	191.767	191.989	291.427	185.061	295.212	210.294	323.41	241.893	230.133	225.846	208.441	360.529	345.946	285.609	370.487	392.904	280.36	305.553	273.9	265.768
CHRNB1_TGGAGGCTGGATTAGCCGAG	CHRNB1	120.088	105.476	176.615	141.264	82.848	117.215	122.418	121.858	108.444	123.637	154.305	227.141	153.383	128.936	146.77	166.415	199.885	170.534	262.444	172.747	207.338	200.294	107.578	91.4449	49.9726	73.361	116.496	91.5664	138.101	115.847
EGFL8_TAGGACTCGTTGTAGTGGAG	EGFL8	450.683	325.542	430.571	518.412	353.987	338.056	458.417	477.276	335.08	315.531	327.341	312.319	334.886	341.302	370.897	409.35	422.229	366.467	366.63	404.965	450.52	388.188	383.442	393.338	376.231	397.842	437.822	414.039	397.039	348.516
KLRB1_ACCCAGTAACAACCAAGACA	KLRB1	224.635	329.449	280.506	274.532	263.607	302.382	306.045	317.338	289.997	307.804	207.822	289.335	365.562	306.413	402.676	339.787	425.224	412.427	378.499	355.406	367.805	242.26	303.986	309.409	363.594	345.643	421.179	401.101	321.084	389.403
TBC1D3_AGAAACTAACAAGAAAGAAG	TBC1D3	315.054	320.334	340.532	177.246	370.933	312.574	255.255	316.069	339.954	349.016	319.314	247.422	332.329	335.234	275.141	294.304	311.431	289.062	286.842	157.172	290.604	153.559	324.966	340.726	387.144	267.344	288.041	263.751	362.514	339.754
CTSK_CAATATGTGCAGAAGAACCG	CTSK	471.875	432.32	400.558	513.081	519.683	492.644	527.44	705.76	562.934	533.183	553.002	500.252	536.84	505.127	518.921	469.281	441.694	480.157	622.48	686.741	627.529	606.604	653.057	573.723	527.872	526.224	482.628	427.973	537.442	497.463
ELL_AGAACGTCCGCGCCTCTGCG	ELL	275.496	247.412	294.359	198.569	333.275	387.32	338.603	232.291	270.501	142.955	206.038	225.789	250.525	128.936	175.622	179.793	217.852	140.298	94.9545	116.109	144.475	123.038	159.805	115.246	145.897	134.73	168.984	63.6984	232.469	271.609
TTC39B_TGCCACCCAAAAACCAAGCA	TTC39B	190.728	290.384	210.091	166.585	271.139	217.443	171.906	204.366	171.805	189.319	262.23	223.085	296.54	288.21	236.671	271.295	248.546	210.446	283.545	513.994	270.753	422.524	219.174	239.26	249.863	266.639	293.161	332.426	186.436	255.059
SLC10A3_GCCATGAGGAAAGCGTACAA	SLC10A3	315.054	210.951	288.587	295.854	267.373	283.695	274.79	266.564	281.467	368.334	333.585	333.952	255.638	429.282	325.737	322.664	348.114	309.622	423.339	392.929	361.188	479.751	302.201	404.612	249.863	284.979	446.783	341.383	245.129	330.993
ZNF117_CTTATGTCTAATAAGGTGTG	ZNF117	220.396	244.808	247.03	197.236	192.057	186.865	222.697	290.682	294.87	222.803	239.039	269.054	305.487	239.67	250.47	275.04	259.776	266.082	257.168	353.99	200.17	320.47	165.161	271.829	222.866	255.353	364.851	280.671	235.922	196.649
ACTL6A_TGTTCCGAGGGAGAATATGG	ACTL6A	332.008	459.666	361.311	450.445	348.338	355.044	329.487	313.53	175.46	189.319	218.525	310.967	232.63	241.187	232.908	234.373	192.399	261.244	209.691	228.678	90.9862	207.924	161.59	245.523	121.198	201.037	62.7289	130.383	151.911	233.642
POPDC3_AACACTGTTATGCCATGCAG	POPDC3	388.519	462.27	421.337	430.455	457.547	465.464	450.603	375.728	377.727	449.471	409.4	378.569	414.133	430.799	429.019	418.982	474.633	405.17	678.529	652.05	526.617	504.549	368.265	442.192	398.632	413.361	320.045	362.284	383.229	350.463
LAMP5_ACTCATAGGACTTCCCAGCG	LAMP5	250.065	290.384	304.748	234.551	325.743	249.72	170.604	192.942	319.24	373.486	378.182	373.161	322.104	436.866	337.863	253.636	303.945	275.757	420.701	347.618	270.201	335.73	352.196	349.495	249.289	335.768	313.644	256.784	243.978	366.039
GTDC1_CTCGGCCTTAAAGGAAATGG	GTDC1	81.9423	84.641	80.8043	106.614	103.56	95.1313	58.6044	50.7741	87.73	109.47	72.247	86.53	129.097	56.1252	86.1384	124.143	104.06	58.0542	150.345	124.605	95.3976	125.899	63.8327	76.4129	78.1181	52.1992	129.298	125.406	132.346	72.0396
STX1B_TGAAGTGGTCCCGATCCACG	STX1B	139.867	52.0868	155.837	159.921	131.804	134.203	135.441	134.551	164.494	106.894	144.494	118.979	152.105	81.9124	172.695	94.7123	120.53	133.041	126.606	65.1342	116.903	39.105	143.289	105.224	126.942	123.444	134.419	113.463	149.609	183.993
FLG_ATCTACTGATTGCTCGTGGT	FLG	432.316	334.658	449.041	514.414	489.556	366.935	352.929	349.072	347.265	403.107	361.235	420.482	499.772	521.813	422.329	429.684	453.672	360.42	304.646	275.404	392.619	378.651	375.854	268.071	385.995	419.709	371.252	443.898	370.57	441.973
PFKFB3_AGATGGTACGCGGCTGCACG	PFKFB3	182.251	143.239	233.178	182.577	209.003	183.468	166.697	208.174	220.544	153.258	225.66	216.325	322.104	201.747	229.145	222.066	231.328	204.399	338.935	255.581	408.611	196.479	236.583	241.765	257.905	189.751	277.799	280.671	254.335	268.688
MCF2_GTATCAGTTCATTTAGTACG	MCF2	413.95	391.953	383.243	289.191	352.104	375.429	295.627	229.753	402.096	502.274	443.293	379.921	465.261	408.045	381.769	390.622	462.655	445.082	375.202	440.364	500.7	301.394	445.043	355.758	414.715	311.784	463.425	544.422	363.665	335.86
RBMY1E_GCCACCCTCTTGTTCCTCCA	RBMY1E	302.339	210.951	232.024	341.165	303.148	297.285	247.441	213.251	411.844	336.137	356.775	354.232	359.171	371.64	378.842	372.428	401.267	405.17	383.774	407.089	426.808	305.209	324.52	241.765	405.525	349.17	400.697	344.369	470.693	350.463
TLR6_TATTAACTGATATGTTCACT	TLR6	576.422	498.731	506.758	302.518	562.99	453.573	363.347	437.927	476.423	618.183	563.705	689.536	498.494	570.353	707.087	641.047	640.081	621.664	724.688	718.6	737.264	725.826	470.933	528.627	515.235	503.651	677.216	630.016	516.726	425.423
TMEM37_GATTCAAAGAAGGACCGGCG	TMEM37	339.072	328.147	400.558	262.537	267.373	356.743	278.696	393.499	320.458	320.682	374.614	363.697	363.006	335.234	361.279	296.444	338.382	379.771	451.034	543.021	494.083	555.1	399.066	395.844	360.147	383.734	358.451	300.577	394.738	373.827
PCM1_TTACTAAAGCTAGTTCCATG	PCM1	442.206	356.794	345.15	515.746	414.24	445.079	425.859	417.617	352.139	355.455	356.775	371.809	296.54	298.829	234.999	279.321	363.836	302.366	313.218	354.698	318.727	368.159	447.275	419.644	404.95	302.614	293.161	319.487	330.291	375.774
CACNA1E_GTCCACGTGAGTATTGAAGT	CACNA1E	521.322	632.854	532.154	451.778	521.566	470.56	592.556	610.558	491.045	482.956	631.492	615.174	531.727	687.154	619.694	645.863	643.076	608.36	429.933	400.009	462.651	456.86	522.267	538.648	535.913	525.519	501.831	583.238	552.402	546.138
RFX4_AGAACTATGAGATTGCAGAG	RFX4	155.408	227.88	187.004	155.923	212.769	174.974	144.558	205.635	183.989	251.137	224.768	258.238	177.668	166.859	122.517	219.39	169.191	214.075	379.159	268.324	298.876	177.403	178.999	259.303	154.513	177.054	198.428	198.062	164.57	258.953
KIAA1462_ACTGTCCCCTTGCCACACAG	KIAA1462	194.966	248.714	210.091	187.908	201.471	210.648	233.115	217.059	168.149	227.955	294.34	259.59	325.938	294.278	200.293	252.031	233.574	201.98	196.503	201.774	155.504	190.756	269.615	264.313	318.216	316.017	226.592	196.071	231.319	221.96
POTED_ATGTACTTGATAGATATGGA	POTED	204.856	404.975	313.982	237.217	370.933	248.021	260.464	309.722	387.474	413.41	292.556	365.049	273.533	345.853	331.173	278.251	355.601	435.407	257.168	203.19	250.901	155.466	367.373	301.893	309.6	281.452	353.33	348.35	375.173	282.317
TLE1_AGACCCCCTCGTTAACCAAG	TLE1	669.666	703.171	671.83	710.317	570.521	647.233	630.323	623.252	528.817	643.941	639.52	684.128	736.237	681.087	819.569	646.933	734.409	682.137	569.068	419.832	490.774	499.781	646.808	666.42	692.724	650.373	713.061	763.385	718.123	593.84
HIGD1B_ACACAGTCTTCGTCGTCAGG	HIGD1B	291.036	259.132	273.58	390.475	241.012	292.189	268.278	270.372	382.6	280.758	335.369	346.12	386.013	313.998	395.149	397.043	373.568	364.048	305.305	181.243	270.201	151.651	300.862	370.79	315.919	351.992	401.977	292.614	370.57	238.51
PDE2A_GCCGCGGTAGAAAAGCGGAT	PDE2A	98.8959	114.591	106.2	115.943	116.74	105.324	84.6508	93.9321	81.6377	54.091	126.655	78.4178	80.5259	83.4293	71.5032	93.6422	64.3824	54.4258	127.265	45.3107	129.586	43.8739	75.885	86.4342	168.299	119.917	117.777	98.5334	62.1453	123.636
HBEGF_TGGTCCGTGGATACAGTGGG	HBEGF	453.508	394.557	458.276	514.414	355.87	389.019	347.719	359.227	275.375	386.364	283.636	436.706	476.765	357.988	434.037	370.288	372.071	335.021	484.664	501.25	373.871	463.537	387.906	432.171	420.459	517.054	412.218	477.738	382.078	385.509
METTL4_TAATTGTGATAGATCCACCA	METTL4	291.036	220.067	230.869	198.569	192.057	263.31	199.255	206.904	182.771	333.561	302.367	279.871	255.638	245.737	205.729	254.172	250.043	284.224	353.442	323.547	259.173	439.692	319.61	310.662	278.583	225.726	238.114	178.156	275.05	330.993
PLOD3_CCACGTTCCGGATACGCACA	PLOD3	737.481	721.402	671.83	730.307	698.559	669.317	683.718	705.76	783.478	788.183	885.695	699	696.613	802.439	687.852	847.595	800.289	757.124	814.367	955.773	909.862	1099.71	663.771	771.645	760.503	744.191	786.031	898.744	768.76	662.959
MGAT4B_TCATGAGGAAGCAGTAATCG	MGAT4B	145.518	160.167	146.602	271.866	180.759	157.986	209.674	224.675	119.41	159.697	158.765	167.652	158.495	256.356	152.206	133.239	154.218	148.764	222.22	233.633	215.058	303.302	106.239	204.185	118.9	145.311	177.945	164.222	143.855	198.596
B4GALT6_CTCTTTATGGTACAAGCTCG	B4GALT6	165.297	234.39	184.696	207.898	178.876	232.732	234.418	211.982	174.242	240.834	225.66	227.141	228.796	121.352	168.095	208.153	260.524	235.845	255.85	276.82	191.347	309.978	137.486	164.1	189.551	184.813	235.553	374.228	207.151	231.695
HOXB4_TCGCCCGGGTACTACGCCGG	HOXB4	74.8783	75.5258	95.8108	111.945	135.569	118.914	143.255	149.784	81.6377	110.758	86.518	82.4739	111.202	112.25	125.862	166.951	128.016	165.696	114.077	7.78778	49.0774	21.9369	130.79	82.6762	90.1805	117.801	104.975	135.359	100.123	150.894
PEG3_CATTCATAGAGCATCCCTCG	PEG3	243.001	152.354	260.882	210.563	271.139	234.431	287.813	257.679	240.039	244.697	214.065	275.814	269.698	329.167	318.628	235.978	273.251	270.92	307.943	424.788	309.904	539.839	267.829	294.377	268.818	257.469	295.722	285.647	199.095	241.43
BPNT1_TAATAGCACTGTACTGCGAT	BPNT1	461.985	500.033	484.826	590.376	504.62	450.175	505.3	510.28	353.357	431.44	479.863	562.445	426.915	505.127	433.619	506.738	422.229	468.062	471.475	711.52	494.083	559.869	395.048	367.032	377.379	346.348	327.726	285.647	383.229	380.642
ITPA_TGATAAGTGCCGGAGTACCA	ITPA	443.619	596.394	498.678	501.087	587.468	528.319	593.858	656.255	720.117	587.274	577.976	616.527	545.787	626.479	562.408	583.257	594.415	530.954	509.721	482.134	572.386	506.457	498.163	459.73	500.875	569.253	554.318	540.441	509.821	666.853
STX7_GATGTTAGAAGAGATCCTCT	STX7	371.566	476.594	408.639	347.829	327.626	422.995	419.347	398.577	430.121	368.334	469.159	475.915	407.742	555.184	492.996	467.141	482.12	494.67	472.135	556.472	404.199	716.288	538.337	543.659	512.363	447.925	431.421	513.568	436.168	412.767
OR5M1_GTGTGATTAGGTAGATCGCA	OR5M1	274.083	257.83	251.648	218.559	209.003	219.142	238.325	223.406	176.679	191.894	233.688	236.606	256.916	273.041	277.232	217.25	274	285.433	331.681	303.723	389.862	305.209	315.146	241.765	268.818	275.104	235.553	276.69	262.391	216.119
C7orf25_AGGAGAAAAGCAAACCCTTG	C7orf25	580.66	854.223	663.75	637.02	604.414	669.317	674.602	613.097	698.185	721.214	602.95	762.546	708.117	841.878	579.97	623.924	571.956	607.15	617.864	562.844	528.823	579.898	735.192	806.719	605.99	677.884	755.307	788.267	621.453	815.8
SNX31_TCTGGCAATGACCACAGCTA	SNX31	138.454	128.915	160.454	142.597	124.272	205.552	151.069	82.5079	146.217	153.258	114.168	136.555	230.074	206.298	148.442	139.661	144.486	126.994	281.566	206.022	288.399	144.975	158.466	224.228	145.897	145.311	208.669	155.265	111.631	198.596
ANXA10_ATGGATGCCCAAATGCTAGG	ANXA10	298.1	216.16	207.782	334.502	222.183	190.263	246.138	266.564	188.863	249.849	278.285	283.927	227.518	169.892	220.782	241.864	204.377	239.474	223.539	235.757	244.836	264.197	257.116	324.442	226.313	265.934	291.881	269.723	378.626	236.562
ZFP64_ACAGGCAGGACTCACCCGTG	ZFP64	789.754	799.532	856.526	958.195	711.74	701.594	677.206	767.958	827.343	1125.61	959.725	1019.43	743.906	963.23	879.364	1065.92	873.655	971.198	795.244	1304.81	766.49	1388.7	837.86	896.912	770.842	915.602	802.673	878.838	866.581	813.853
HNF1A_AGCAGCACAACATCCCACAG	HNF1A	744.545	751.352	795.345	856.912	815.3	762.75	739.718	812.385	727.428	770.153	823.259	816.627	757.966	867.665	735.521	798.366	747.884	865.975	973.943	1047.1	957.836	1090.17	697.696	799.203	842.642	775.933	798.833	1029.13	906.861	808.985
ALDH1A3_GAATGGCACGAATCCAAGAG	ALDH1A3	269.844	341.168	281.661	307.849	327.626	280.298	286.51	250.062	308.274	294.925	313.962	305.559	272.254	356.471	305.248	256.312	289.721	244.311	371.905	368.15	367.805	359.575	318.717	335.716	329.13	278.631	422.46	380.2	295.765	314.443
ATP1A4_AAGGAAATCCTGACTCGAGG	ATP1A4	521.322	529.983	510.221	517.079	536.629	523.222	498.789	465.852	452.053	390.228	643.087	557.037	484.434	488.441	499.268	577.371	612.382	494.67	582.256	385.141	474.231	506.457	630.292	479.773	614.606	539.626	549.197	465.794	547.799	527.641
OTOS_GTGTCTTTCAGACCCTTACG	OTOS	233.112	269.549	211.246	183.91	237.247	244.623	229.208	244.985	242.476	269.167	227.444	219.029	246.691	259.389	302.739	244.54	247.798	273.339	193.206	271.864	176.458	270.873	249.974	245.523	233.78	202.448	368.692	272.709	235.922	239.483
TMEM51_ACAAACTACTCAGAAGCAAG	TMEM51	300.926	214.858	279.352	159.921	224.066	253.117	268.278	211.982	254.661	249.849	264.906	233.902	249.247	239.67	275.141	240.259	346.617	247.94	203.757	247.793	251.453	200.294	201.765	243.018	227.462	216.556	254.756	294.605	304.972	258.953
GDF1_CGGTTGCAGGGTGACCCCTG	GDF1	289.624	221.369	222.789	183.91	259.841	205.552	298.231	253.87	254.661	233.107	250.635	235.254	221.127	253.322	252.979	314.103	238.814	246.73	181.337	115.401	177.009	150.697	246.849	268.071	315.919	249.004	235.553	280.671	255.486	358.251
ARL2_GATGTTGAAGCCCAGCGTTG	ARL2	98.8959	92.454	156.991	167.917	171.345	149.492	138.046	220.867	80.4192	56.6668	31.2178	60.8414	42.1802	68.2604	26.3433	55.1151	34.4371	35.0744	44.1802	12.7436	12.1315	2.86134	58.4761	63.8862	71.7997	87.4689	6.4009	17.9152	24.1676	21.4172
SHC3_TTGAAGTTCTGCGCTCAATG	SHC3	600.439	657.596	704.152	696.99	610.062	665.919	735.811	646.1	777.386	786.896	814.34	688.184	777.139	773.618	817.896	751.278	774.835	849.043	973.284	1136.31	942.948	1202.72	635.202	875.616	668.025	700.456	666.974	754.427	853.922	802.171
TNNT1_AGCGTGGTAAGCGGCAGACG	TNNT1	292.449	313.823	370.545	370.484	348.338	300.683	282.603	244.985	403.315	318.107	257.77	348.824	291.427	351.92	264.269	253.101	298.705	278.176	290.798	332.043	401.442	446.369	284.792	310.662	324.535	282.863	396.856	291.619	313.028	303.735
TESC_TGCCAATCTTACCGAATGGT	TESC	156.821	171.886	98.1195	151.925	163.813	132.504	233.115	151.053	137.687	204.773	164.117	128.443	199.398	125.902	209.492	148.222	151.224	164.487	126.606	184.075	183.075	112.546	216.942	156.584	124.07	171.411	193.307	115.453	146.156	145.053
TFR2_GAGCAGCTAAATCCGCTGTG	TFR2	141.28	184.908	210.091	194.571	190.174	185.166	256.557	209.443	226.636	185.455	160.549	250.126	184.059	260.906	221.618	213.504	243.306	220.122	405.535	492.754	390.965	522.671	222.745	214.207	243.545	261.701	106.255	199.057	280.805	217.092
OR1N1_ATGACTGTGGAGTAGCAGAG	OR1N1	267.019	199.232	242.413	202.567	182.642	234.431	248.743	258.948	282.686	328.41	282.744	255.534	288.871	338.268	225.8	272.365	213.36	262.453	221.561	373.106	317.625	389.142	354.428	255.545	324.535	261.701	176.665	217.968	271.598	314.443
PDCD5_CGAGCTGCAGGCCAAACACG	PDCD5	505.782	593.789	602.569	631.689	547.927	621.751	591.253	550.899	344.828	415.986	602.058	596.246	573.907	497.542	470.834	621.784	495.595	512.812	611.929	538.773	425.705	464.491	544.587	501.068	511.214	662.365	439.102	382.19	446.525	644.462
DOK1_TCGAAAGAGAACATGACCTA	DOK1	196.379	276.06	245.876	171.915	212.769	208.949	239.627	266.564	153.528	206.061	218.525	269.054	227.518	244.22	191.93	170.161	208.869	162.068	295.414	276.82	318.727	295.672	161.144	220.47	225.738	241.245	240.674	251.808	218.659	183.993
POMT1_TGTGGCGACTCACCTACCCG	POMT1	132.803	105.476	136.213	145.262	144.984	142.697	93.767	156.13	103.57	108.182	122.196	105.458	126.541	116.801	131.716	100.063	126.519	124.575	100.889	87.0816	67.8261	123.991	102.668	124.014	136.132	121.328	119.057	74.6465	98.9721	77.8807
SRP19_TCCAGCTCAAACAGGAAGAT	SRP19	113.024	93.7562	116.589	66.6339	188.291	129.107	141.953	156.13	99.9148	105.606	86.518	55.4333	54.9621	68.2604	160.15	137.52	160.207	177.791	139.794	75.0459	115.801	88.7015	66.511	87.6869	99.9452	59.9585	79.3712	50.7596	178.38	127.53
PROP1_AGATCAAGGTTCTCCCCGCA	PROP1	875.935	949.281	824.204	956.863	971.581	766.147	1040.55	929.166	794.444	829.396	957.05	801.755	920.296	952.611	885.636	860.973	862.425	783.732	900.09	905.507	898.833	888.923	947.223	993.367	899.507	970.622	939.653	787.272	932.179	820.667
CLECL1_GGAAGTCCACCACCCACTTG	CLECL1	445.031	339.866	442.115	411.797	442.484	472.259	359.44	383.344	337.517	309.092	322.882	360.992	544.509	465.687	478.361	473.562	443.191	411.217	417.404	305.847	379.385	296.625	381.211	393.338	349.234	461.328	460.865	482.714	356.76	477.019
YIF1A_CCGCTTGTGTCATCGAAGAG	YIF1A	368.74	324.24	266.654	207.898	289.968	292.189	279.999	239.908	271.719	283.334	330.909	304.207	374.509	277.592	285.177	299.12	299.453	264.872	220.242	336.291	272.959	339.546	328.091	283.103	355.552	288.506	279.079	248.822	278.503	365.066
FA2H_TATGGAACCACGGTTCAAAG	FA2H	357.438	296.895	309.365	406.467	436.835	400.911	372.464	427.772	386.256	421.137	348.748	264.998	511.276	371.64	453.272	368.683	379.557	458.386	428.614	398.593	410.816	402.495	386.567	429.666	424.48	524.813	408.378	447.879	374.022	401.085
METTL15_TTGAGATCTGTGTAACTCCT	METTL15	199.205	191.419	221.635	239.882	169.462	178.371	269.58	288.143	188.863	181.591	201.578	151.428	232.63	171.409	214.928	186.214	176.677	192.305	165.511	213.102	109.183	162.143	150.877	179.132	198.167	189.046	226.592	192.09	256.637	211.251
OTUD6B_AAAGGATTGTGCTCTGACTG	OTUD6B	473.287	552.12	500.987	626.359	468.844	538.511	427.161	470.93	443.524	625.91	483.43	580.022	364.284	550.634	374.242	493.36	406.508	537.001	652.812	853.116	669.989	826.927	383.442	488.541	374.507	574.896	390.455	582.243	476.447	389.403
AAED1_GTCATCCTACCATCATATTG	AAED1	281.147	326.845	342.841	239.882	321.977	271.804	225.301	337.648	315.584	363.183	290.772	317.727	277.367	266.974	279.322	290.558	336.136	287.852	196.503	141.596	267.444	184.079	274.972	232.997	261.351	274.398	327.726	331.43	352.157	302.761
ZFP37_AAGGGGAAAAGACCCAGTCA	ZFP37	418.188	399.766	554.087	521.077	425.537	390.718	428.463	413.809	431.339	409.546	497.701	534.053	416.69	394.393	412.293	443.061	461.907	362.839	593.466	778.778	701.972	652.385	496.824	427.16	530.169	393.61	480.068	492.667	301.52	451.708
CORO1A_GTGCCTTTAGACTGGACGTG	CORO1A	211.92	143.239	219.326	257.207	188.291	220.841	252.65	208.174	271.719	203.485	216.741	185.228	207.067	285.177	445.745	267.014	307.688	256.406	181.996	150.8	176.458	147.836	289.256	226.733	235.503	215.851	254.756	180.147	262.391	171.337
NRSN1_CTGCCAGAACAGTCAATCCG	NRSN1	464.811	548.213	462.893	566.388	610.062	496.042	520.928	529.32	458.146	504.849	536.947	566.501	610.975	529.397	513.067	467.141	517.305	460.805	578.959	512.578	463.754	571.314	562.442	578.734	534.764	537.51	508.232	551.389	451.129	458.522
ENTPD4_GGATAAAAACCGAAAGCCAG	ENTPD4	240.176	171.886	249.339	131.935	222.183	202.154	197.953	209.443	253.442	260.152	182.847	194.693	249.247	219.95	267.614	219.39	264.267	220.122	230.792	346.91	207.89	301.394	240.6	210.449	216.548	225.021	194.587	227.921	195.643	327.099
PITPNM1_TTGACCGAGTGATAAAGCCG	PITPNM1	176.6	243.506	173.152	193.238	180.759	140.998	152.371	222.137	207.14	149.394	180.172	124.387	111.202	83.4293	162.241	179.793	131.759	162.068	209.691	139.472	307.147	175.495	166.501	126.52	129.24	148.838	171.544	145.312	108.179	259.927
CHRDL2_CGGTGGGACAGGTCACACGC	CHRDL2	279.734	320.334	371.7	290.524	357.753	395.814	389.394	432.849	238.821	316.819	354.991	342.064	365.562	373.157	328.664	389.551	317.42	355.582	212.329	421.956	325.345	483.566	414.689	377.054	401.504	363.278	437.822	445.888	310.726	331.966
SCUBE1_CTCTACGGGACAACCCACTG	SCUBE1	388.519	464.874	449.041	539.734	448.132	482.452	455.812	431.58	450.835	449.471	423.671	589.486	472.93	453.552	413.13	344.068	429.715	424.521	391.028	544.437	414.676	343.361	487.003	488.541	553.145	466.265	524.874	394.134	399.341	312.496
PCDHB8_GTCCTATGAAGTCAATATCG	PCDHB8	302.339	394.557	431.726	406.467	414.24	428.091	464.928	511.549	473.986	459.774	394.237	431.298	478.043	458.103	357.516	409.35	419.983	516.441	439.824	420.54	364.496	429.201	373.176	350.748	414.141	401.369	377.653	405.082	462.637	436.132
IL3_TTGTCTGGGTCATGGGAGCT	IL3	1165.56	1095.12	914.243	1154.1	911.328	978.494	945.484	977.401	985.745	1116.59	1203.22	1229	1086.46	1286.33	1123.14	1168.65	1353.53	1162.29	1272.65	1149.76	1240.72	944.242	1195.86	1220.1	1007.49	1162.49	1248.18	1018.18	1179.61	1055.28
JRK_GGCCCTGATGTCGTAGAGGG	JRK	375.804	317.729	352.076	447.78	357.753	326.165	424.556	331.301	274.156	427.577	355.883	308.263	525.336	397.427	357.098	403.464	410.251	419.684	399.6	344.786	365.599	444.461	364.248	329.452	451.477	312.49	317.485	326.454	372.872	455.602
Non-Targeting_TCGGAAGCAAACTTCTGGAG	Non-Targeting	425.252	566.444	582.945	501.087	587.468	635.341	503.998	470.93	578.775	629.774	619.005	505.66	681.275	665.918	681.58	635.161	692.486	580.542	864.482	1037.9	1003.61	1182.69	752.154	661.41	678.364	669.419	702.819	635.988	688.201	713.582
TRAM1_CGTAATTCAAGAGTATATGT	TRAM1	285.385	380.233	292.05	167.917	355.87	288.792	196.65	275.449	297.307	311.667	278.285	273.11	374.509	367.089	300.648	263.268	282.235	304.785	356.079	227.262	299.979	235.584	321.842	301.893	243.545	237.718	504.391	411.053	338.347	316.39
ZNF714_CTTTGTCACATTCTTCACAT	ZNF714	247.24	181.002	218.172	191.906	165.696	208.949	231.813	211.982	174.242	221.516	154.305	118.979	84.3605	101.632	122.935	105.414	125.77	82.2435	65.9406	70.798	53.4889	82.9788	185.249	86.4342	159.683	137.552	52.4874	27.868	128.894	56.4635
NANS_TATGTGACGTTCCAACACCT	NANS	501.543	414.09	525.228	487.76	333.275	504.536	434.975	510.28	432.558	548.637	430.806	474.563	481.877	365.572	590.842	414.701	435.704	481.366	240.024	235.757	277.921	231.768	514.233	412.128	410.694	454.979	489.029	382.19	360.212	409.847
PLA2G4D_TAGCGCCCACAGGTCCACAA	PLA2G4D	276.908	300.801	371.7	367.819	239.129	298.984	274.79	274.18	327.769	245.985	342.504	355.584	346.389	383.775	272.632	356.91	375.065	345.906	524.228	432.576	567.974	379.604	298.63	275.587	305.005	409.129	427.58	422.997	356.76	309.576
FAM149B1_ATAACTCACACCATATCCCC	FAM149B1	299.513	421.903	413.256	373.15	463.196	317.671	369.859	412.54	313.148	392.804	452.213	370.457	360.449	321.582	344.135	353.7	340.628	385.819	400.919	329.919	282.884	305.209	284.346	255.545	343.49	291.328	350.769	338.397	382.078	362.145
ASPA_ATTTGCCATATGAAGTGAGA	ASPA	907.016	815.158	916.552	863.575	788.939	835.797	879.066	878.392	887.048	1035.46	973.996	970.759	893.454	910.138	1135.69	944.448	1017.39	942.171	1053.07	923.206	1076.39	1108.29	890.979	784.171	853.555	806.265	1125.28	921.636	1105.96	1011.48
UPF2_GGACTAATTATCTCACTAGG	UPF2	493.066	441.435	476.745	357.158	457.547	487.548	334.696	363.035	516.633	311.667	404.048	356.936	375.788	222.984	337.863	333.901	345.869	299.947	193.206	100.533	169.841	224.138	403.976	279.345	338.895	338.589	165.143	128.392	329.14	284.264
PEPD_GTGTCATCGATGTTGACACT	PEPD	196.379	210.951	251.648	161.254	207.12	207.25	145.86	159.938	194.956	226.667	217.633	204.157	265.863	250.288	221.2	217.785	219.35	181.419	240.024	298.768	269.099	192.663	195.515	212.954	245.842	155.187	259.877	243.845	226.715	194.702
CCDC146_CACGATCACAATGATCGAAG	CCDC146	279.734	287.779	279.352	285.193	320.095	324.466	312.557	288.143	232.728	255.001	346.072	359.64	327.216	389.843	247.543	358.516	361.59	333.812	336.297	397.177	222.227	317.609	315.592	407.118	342.916	313.9	285.48	263.751	306.123	284.264
SLC35A1_ATAAAGTTATTGCTAAGTGT	SLC35A1	576.422	523.472	413.256	319.843	478.259	414.501	394.603	562.323	504.448	410.834	386.209	421.834	433.306	483.89	306.92	544.195	376.562	445.082	307.943	206.022	94.2948	235.584	418.26	304.399	385.995	429.585	485.188	449.87	468.391	450.734
HCAR3_TCGTGATGGACTACTATGTG	HCAR3	251.478	264.34	240.104	322.508	220.3	276.9	210.976	196.75	271.719	224.091	242.607	231.197	208.345	189.612	212.419	371.358	294.961	284.224	340.913	323.547	328.102	249.89	237.029	305.651	322.812	356.224	224.032	239.864	260.089	282.317
PCTP_CTCCACTAGGAGCTGCCAGT	PCTP	553.817	682.337	637.2	625.026	621.36	597.968	612.09	608.02	554.405	749.547	693.036	657.087	655.711	571.87	681.162	774.822	690.988	789.779	721.39	933.826	969.417	785.914	742.78	721.538	748.44	731.494	728.423	726.559	788.324	727.211
PHF21A_ACAGCAAATCCGGTCTACAG	PHF21A	194.966	188.815	185.85	126.604	274.905	249.72	218.79	161.208	204.703	168.712	230.12	198.749	139.323	135.004	167.259	142.336	188.656	198.352	302.008	359.654	319.279	250.844	218.281	131.53	183.807	150.249	163.863	196.071	239.374	177.178
NBPF11_TGAGTATTCAATGTTACCTG	NBPF11	139.867	125.008	141.985	137.266	165.696	193.66	200.557	163.746	127.94	88.8638	108.816	125.739	121.428	97.0814	77.3573	81.3349	71.8688	70.1488	23.0792	36.815	33.6373	11.4454	151.77	72.6549	116.603	85.3527	48.6469	69.6701	64.447	89.5628
ARG1_ACTCCACTGACAACCACAAG	ARG1	216.158	203.138	143.139	139.931	161.93	161.384	170.604	130.743	190.082	179.016	235.472	223.085	148.27	157.757	177.294	209.758	177.426	181.419	197.822	179.827	229.395	253.705	161.144	171.616	156.811	225.726	125.458	89.5758	212.905	263.821
ABCG1_ATGAAAGGGCTCGCTCAAGG	ABCG1	213.332	273.456	158.146	178.579	201.471	220.841	182.325	133.282	244.913	224.091	222.093	166.3	224.961	326.133	200.711	232.233	202.131	198.352	147.707	143.72	153.849	228.907	213.817	146.562	210.23	239.129	157.462	137.35	202.548	210.278
IVL_ACAGCACTGGGAACAGCATG	IVL	350.374	425.809	347.458	315.845	321.977	365.236	395.905	402.385	388.693	258.864	342.504	348.824	286.314	397.427	339.536	318.918	342.125	320.508	262.444	317.883	290.053	375.789	325.413	269.324	321.088	338.589	369.972	304.558	475.296	307.629
TCEAL5_GAAAGAAACCTAGAAAGTGA	TCEAL5	370.153	661.502	376.317	290.524	344.572	338.056	330.789	427.772	331.425	334.849	267.581	310.967	300.374	317.032	367.97	258.452	364.584	355.582	494.555	406.381	401.994	535.07	360.677	310.662	300.41	378.797	369.972	339.393	390.134	463.39
APH1A_GCGTTATCATCCTGGTCGCA	APH1A	151.169	192.721	109.663	211.896	150.633	130.806	149.767	185.325	90.167	139.091	132.007	164.948	176.39	209.332	193.184	187.819	180.421	148.764	145.729	83.5417	161.569	105.87	172.304	113.993	208.506	140.373	227.872	293.61	120.838	118.768
CD200R1_ACCGTGGCCATCACTCATGA	CD200R1	895.714	872.454	865.76	999.508	866.138	713.485	704.555	741.302	679.908	878.335	936.535	800.403	876.838	951.095	830.023	813.349	837.72	833.32	876.351	698.776	869.056	931.843	894.997	934.492	801.285	804.149	970.377	876.848	818.246	707.74
C19orf24_GCACGCACACGCGTCCGCCG	C19orf24	52.2735	29.9499	83.113	81.2933	69.6676	44.1681	18.2325	48.2354	47.5204	61.8183	74.0309	47.3211	66.4658	57.6421	33.8699	50.8343	42.6721	50.7974	90.9981	106.197	95.3976	69.6259	48.2093	32.5694	48.8238	50.083	38.4054	0	56.3911	48.6754
NELFA_TGAGCTTCACTGCCGACGAG	NELFA	293.862	188.815	322.063	297.187	474.493	353.345	406.324	276.719	319.24	150.682	269.365	159.54	279.923	144.105	273.887	180.863	288.224	130.622	183.315	45.3107	137.858	31.4747	184.802	122.762	202.188	127.676	160.023	59.7172	314.179	220.986
GAA_GAGGCCTGTGATATACTGCG	GAA	113.024	85.9432	130.441	121.274	163.813	166.48	197.953	116.78	216.888	279.47	158.765	196.045	126.541	138.038	112.064	133.239	133.257	125.784	160.236	219.474	130.689	203.155	180.338	204.185	202.188	147.427	135.699	182.137	166.872	114.874
LCOR_AAGCTTACAGGATGGAACCA	LCOR	621.631	950.584	681.065	751.63	732.452	774.641	688.927	774.305	872.427	743.108	934.751	813.923	649.32	728.111	833.368	868.999	797.294	865.975	929.103	1041.44	902.693	995.746	782.955	920.712	825.41	919.128	960.135	993.296	737.687	877.131
MFF_TCTTCAGGTAACATATGGGG	MFF	183.664	154.958	148.911	131.935	146.867	161.384	147.162	177.709	82.8562	136.515	199.794	162.244	217.292	142.588	123.772	98.9931	167.694	105.223	189.909	154.34	169.841	119.222	142.396	78.9182	148.195	106.515	175.385	84.5994	134.648	139.212
PATZ1_CGCCTACACTTCCCGCATCG	PATZ1	235.937	203.138	242.413	238.549	205.237	193.66	164.092	187.864	201.048	176.44	231.904	214.973	244.134	221.467	214.091	206.548	202.88	212.865	162.873	286.732	177.561	239.399	204.89	268.071	190.7	215.851	285.48	249.817	191.039	214.172
CD151_AGGTAAACAGCAGGTACTTG	CD151	639.997	575.559	504.45	625.026	681.613	660.823	744.927	713.376	763.983	761.138	709.983	731.449	862.778	670.469	727.158	646.933	705.961	736.563	650.834	587.624	564.114	625.679	662.431	598.776	676.641	602.407	874.363	824.097	825.151	934.568
HDGFRP2_TGTCTTTACATTTGTCGTAG	HDGFRP2	425.252	566.444	348.613	365.154	376.582	334.658	453.207	341.456	417.936	432.728	326.449	347.472	444.81	455.069	486.724	451.623	481.371	492.251	452.353	616.651	416.882	598.974	516.911	502.321	526.148	482.49	355.89	539.445	384.38	372.854
TMEM194B_CTGGCATACAATATAAACTG	TMEM194B	285.385	389.349	390.169	174.581	378.465	319.37	306.045	345.264	414.281	382.501	346.072	429.946	379.622	423.214	398.913	415.236	441.694	362.839	380.477	393.637	321.485	393.911	370.944	316.925	462.965	382.324	396.856	387.167	351.006	433.211
GP1BB_CCAGCTCGGTTGTGTCGACA	GP1BB	49.4479	69.015	99.2739	71.9646	111.092	103.625	59.9067	66.0063	21.9325	30.9092	41.9211	28.3927	58.7967	45.5069	21.7437	6.42118	29.9453	33.865	6.59406	14.1596	36.9459	21.9369	29.0149	28.8114	21.8271	24.6888	25.6036	10.9482	34.5252	28.2317
CD244_ATTTCATCACATATTGAAGT	CD244	524.148	473.99	503.295	366.486	514.034	484.151	351.626	401.115	410.625	526.743	453.997	398.849	507.441	647.715	707.087	636.232	616.125	604.731	714.137	666.917	678.261	577.99	514.233	454.719	392.888	453.568	690.017	598.167	539.743	650.303
BAIAP3_CGAGATTGAGGATGTGAGCA	BAIAP3	536.863	548.213	627.965	507.75	555.458	572.487	589.951	562.323	715.244	726.365	629.708	619.231	685.109	805.472	676.144	676.899	706.71	637.387	668.638	668.333	746.087	700.074	828.486	746.591	674.917	636.971	870.523	955.475	594.983	689.244
SPIN4_GCGCTAAAACTCTCTTATCG	SPIN4	254.304	273.456	252.802	197.236	188.291	151.191	157.581	223.406	289.997	269.167	189.983	200.101	214.736	222.984	229.981	205.478	230.579	234.636	321.131	359.654	247.593	279.457	260.687	224.228	221.718	256.058	266.278	173.18	295.765	325.152
PATE3_TCCAGGACTCACCCACAATG	PATE3	275.496	277.362	304.748	357.158	291.851	344.851	367.254	293.22	405.751	274.319	369.262	346.12	365.562	301.863	367.97	286.277	373.568	355.582	418.723	575.588	400.339	682.906	233.012	263.061	396.335	313.195	311.084	423.992	330.291	268.688
TNR_GAGACTCTGGCAGAGTACAT	TNR	358.851	359.399	432.88	273.199	278.671	259.912	356.836	293.22	303.4	305.228	275.609	323.136	406.464	395.91	378.842	431.824	386.295	361.629	319.153	346.91	240.976	361.482	369.605	379.559	373.359	375.975	273.959	187.114	261.24	332.94
RGS10_GGCCTCATCACAGGTCAACG	RGS10	353.199	309.916	268.963	377.148	246.661	276.9	252.65	290.682	281.467	314.243	324.665	273.11	363.006	376.191	344.135	306.611	354.852	264.872	462.244	456.647	426.257	522.671	310.236	286.861	306.728	407.718	349.489	342.379	284.257	324.178
COL1A2_TACTTACAGGAGGTCCAACG	COL1A2	329.182	220.067	286.278	390.475	306.914	305.779	359.44	336.378	303.4	324.546	447.753	301.503	297.818	368.606	330.336	338.717	336.885	269.71	323.768	410.628	363.945	285.18	256.223	336.968	418.162	394.315	209.95	390.152	291.162	331.966
KCNN1_GCACCTCTCGCAGACGCGCA	KCNN1	553.817	695.358	546.006	711.65	723.037	660.823	587.346	582.633	687.219	604.016	600.274	497.548	586.689	603.725	523.939	559.177	523.295	455.967	590.828	700.192	688.738	698.167	646.362	698.99	552.571	654.606	664.414	684.757	612.246	558.794
LXN_TCAAAGACTTAAGTCCATGA	LXN	312.228	368.514	304.748	387.809	402.943	321.068	369.859	465.852	376.508	391.516	356.775	381.273	375.788	467.204	546.101	466.07	494.847	445.082	373.224	383.017	387.656	475.936	312.021	417.139	295.24	426.763	304.683	318.492	374.022	330.019
GPRC5C_AGGTCATCATCAATACAGAG	GPRC5C	357.438	393.255	363.619	345.164	325.743	329.562	349.022	326.224	309.492	413.41	262.23	254.182	343.833	307.93	296.048	364.402	330.896	296.318	301.349	209.562	334.167	268.012	355.32	329.452	394.611	410.539	491.589	395.129	415.453	349.489
METTL20_AAGCCGCAACTGGATTTCAG	METTL20	902.778	592.487	817.278	699.656	922.625	755.954	895.996	657.525	918.729	861.593	758.147	594.894	736.237	732.661	585.406	675.829	683.502	655.529	741.173	736.299	778.07	821.204	729.389	648.883	631.838	691.286	1029.27	946.518	721.576	785.621
RCAN3_CAGTGCTACACAGATCTGAC	RCAN3	233.112	188.815	233.178	377.148	186.408	212.347	286.51	237.369	231.51	282.046	229.228	317.727	305.487	300.346	201.547	325.875	236.568	291.48	289.479	284.608	259.724	311.886	261.58	264.313	276.285	262.407	335.407	270.718	169.173	278.423
SMTNL2_GTCCTGTGAGCCTCTCCTTG	SMTNL2	950.813	852.921	1036.6	935.54	922.625	902.049	1005.39	736.224	755.453	880.911	681.441	708.465	659.546	773.618	826.677	829.402	817.507	778.894	834.149	826.921	870.159	739.179	772.688	799.203	771.416	889.502	739.944	676.795	706.615	1063.07
FAM155A_AACCGAGGCAAAGACGACCG	FAM155A	66.4015	82.0367	53.1	54.6398	124.272	125.709	65.116	45.6967	74.3268	33.4849	49.0566	54.0813	66.4658	53.0914	32.1973	36.9218	39.6776	45.9596	65.2812	75.7539	54.5917	38.1512	42.4063	40.0854	49.9726	62.7801	19.2027	46.7785	37.9777	57.437
RPS19BP1_AAACTGCGGAACTCGGCCAA	RPS19BP1	367.327	291.686	350.922	271.866	380.348	343.152	487.068	1095.45	315.584	204.773	291.664	254.182	331.051	313.998	303.157	239.189	244.054	238.264	207.713	125.312	178.112	106.823	303.094	271.829	264.797	275.104	142.1	136.354	279.654	230.721
MYL4_CTGGGCAAGCCCAAGCCTGA	MYL4	175.187	188.815	243.567	258.539	227.832	231.033	265.673	195.48	207.14	195.758	253.31	260.942	216.014	182.028	274.723	217.785	228.333	241.893	379.818	328.503	399.236	283.273	205.782	235.502	198.742	223.61	297.002	191.095	177.229	238.51
CT47A7_AGATATCGGGCCCGCGACGG	CT47A7	117.262	171.886	175.461	114.61	167.579	249.72	161.488	189.133	191.3	150.682	129.331	156.836	134.21	142.588	160.569	154.108	172.186	165.696	98.9109	199.65	142.821	198.386	101.775	122.762	164.278	169.295	175.385	211.001	151.911	220.986
IPO11_CTTCAATGAACCAATAAACC	IPO11	228.873	235.693	243.567	162.587	195.823	219.142	238.325	190.403	233.947	195.758	213.173	143.315	132.932	124.386	209.074	154.108	173.683	133.041	147.048	63.0102	132.344	68.6721	123.648	82.6762	146.471	113.568	79.3712	53.7455	199.095	174.258
TBPL1_CAGACTACGGGCTAAGCGTC	TBPL1	401.235	451.853	487.135	621.028	378.465	355.044	394.603	389.691	452.053	547.35	462.024	444.818	481.877	573.387	542.755	451.088	447.683	477.738	388.39	250.625	406.405	231.768	376.3	459.73	486.515	420.415	396.856	414.039	429.263	487.728
GPR137C_TCCGCCGCCTTCTCGCTCAG	GPR137C	224.635	279.966	331.298	378.48	235.364	173.275	244.836	256.409	279.03	303.94	268.473	283.927	384.735	350.403	306.502	329.62	313.677	303.575	283.545	294.52	289.502	327.146	249.528	320.684	286.625	328.714	276.519	325.459	283.106	247.271
CDC14B_TCAGAGTGCCCGTGCGACCA	CDC14B	172.361	100.267	146.602	234.551	229.715	161.384	110.697	124.397	137.687	108.182	221.201	160.892	166.165	203.264	155.969	178.188	181.169	112.48	176.061	163.543	141.166	74.3948	195.515	239.26	120.049	167.884	162.583	166.213	130.045	83.7217
WRN_TAGCATGAGTCTATCAGATG	WRN	322.118	341.168	308.211	431.788	274.905	319.37	293.022	346.533	396.004	323.258	358.559	388.033	273.533	394.393	326.155	371.893	372.819	424.521	481.367	486.382	324.242	525.533	283.006	355.758	316.493	320.954	450.624	394.134	284.257	330.993
KRTAP19-4_TACTATGGCAGCTATTACAG	KRTAP19-4	505.782	369.816	458.276	409.132	444.367	479.054	563.905	534.397	543.439	457.198	452.213	474.563	455.035	553.667	479.615	495.501	506.825	487.413	330.363	345.494	391.516	276.596	596.813	548.669	565.782	574.191	522.314	539.445	529.386	462.416
PPIB_GGGGCCCAAAGTCACCGTCA	PPIB	426.665	460.968	424.8	470.435	465.079	509.632	410.231	483.623	380.164	459.774	502.161	420.482	456.314	524.846	446.581	546.335	486.612	440.244	538.076	533.817	516.14	506.457	514.679	414.634	487.089	453.568	458.305	524.516	501.766	490.648
ATP9B_CTCCAGGCTCTCGACTACCG	ATP9B	275.496	324.24	308.211	383.811	306.914	349.947	233.115	255.14	331.425	443.031	278.285	354.232	337.442	400.461	423.165	344.068	384.049	491.042	282.885	264.077	227.19	208.878	370.051	415.886	389.442	321.66	358.451	374.228	447.676	367.013
NT5M_AGTACTTGAACATCTTGATG	NT5M	916.906	760.467	956.954	731.64	796.47	810.315	708.462	707.029	851.713	687.729	693.036	659.792	810.372	596.141	771.482	740.576	800.289	709.955	750.404	669.749	575.694	589.436	722.247	702.748	660.558	662.365	711.78	729.545	784.872	819.694
KRTAP12-4_CCATTGGGCAGCCCGAAGAG	KRTAP12-4	644.236	558.631	519.456	562.39	508.385	523.222	447.998	506.472	428.902	491.971	426.346	532.701	552.178	471.755	523.102	583.257	611.633	514.022	462.244	724.972	409.162	658.108	514.233	418.392	439.414	488.838	641.371	452.855	499.464	484.807
CDK11B_ACATCACCGAACGATGAGAG	CDK11B	145.518	87.2454	151.219	89.2894	118.623	122.312	122.418	91.3934	194.956	127.5	124.871	89.2341	84.3605	145.622	91.1561	93.1071	53.9016	72.5678	49.4555	80.0018	47.9745	40.0587	112.935	108.982	132.686	96.639	71.6901	69.6701	70.2011	117.794
BRK1_GCAGACTTTCTCAACTCGTT	BRK1	339.072	269.549	232.024	210.563	235.364	263.31	234.418	210.712	212.014	191.894	247.067	183.876	296.54	289.727	252.143	241.329	235.071	280.595	281.566	307.263	333.616	297.579	372.729	288.114	268.818	343.527	282.92	188.109	250.883	240.457
LIPH_AGGAGCGTTACCATCAGTGT	LIPH	416.775	432.32	395.941	449.112	482.025	453.573	388.091	361.765	445.961	386.364	329.125	281.223	352.78	329.167	444.073	329.62	401.267	400.332	416.085	473.639	382.693	511.226	425.849	368.285	348.085	359.046	354.61	305.553	454.581	569.502
RNPEPL1_GAAAGTCATCAAAGCGCTGT	RNPEPL1	299.513	377.629	333.606	233.219	393.528	298.984	441.486	388.422	314.366	265.304	305.935	325.84	273.533	318.548	349.571	354.77	384.797	325.345	323.768	537.357	375.525	465.444	366.48	305.651	385.995	340	322.606	205.029	280.805	357.278
NLGN3_AGTGATGTGACAACGTGAGG	NLGN3	510.02	515.659	592.18	555.727	608.18	536.813	644.648	595.326	555.624	504.849	444.185	446.17	598.193	553.667	370.897	498.176	456.666	558.772	514.996	672.581	650.689	582.759	411.565	487.289	501.449	441.577	624.728	483.709	487.956	605.522
PCBP2_CAAGATCAAGGAAATACGAG	PCBP2	245.827	240.901	222.789	181.244	284.319	248.021	269.58	215.79	242.476	130.076	100.789	194.693	122.706	182.028	153.878	169.091	113.044	198.352	170.786	36.815	223.33	18.1218	78.5633	192.911	121.198	177.054	89.6126	49.7643	109.33	144.079
VDAC1_GCAACACTCACCATAGCCCT	VDAC1	611.742	675.826	640.663	694.325	651.486	625.149	606.881	467.122	590.959	476.516	528.919	557.037	486.99	398.944	452.854	368.683	445.437	382.19	489.279	356.114	690.944	284.226	407.994	534.89	548.55	483.9	322.606	186.119	424.659	508.171
NEUROD2_ACGGCGAAGACGACGAGCCG	NEUROD2	528.386	669.315	572.556	764.957	562.99	552.102	600.369	561.054	578.775	556.365	496.81	494.844	584.133	556.701	513.485	538.844	533.027	587.799	710.84	819.841	751.601	679.091	496.377	588.755	545.104	512.821	838.518	774.333	636.414	682.429
Non-Targeting_CCCTTCTGGCGGGCCAAACA	Non-Targeting	477.526	440.133	449.041	453.11	459.43	504.536	377.673	418.886	539.783	350.304	596.707	527.292	586.689	638.614	542.337	632.486	586.928	562.4	574.343	836.125	774.21	789.73	635.649	546.164	565.782	558.672	569.68	799.215	532.838	552.953
RANGAP1_GCCATTGCAGATGCCATCCG	RANGAP1	300.926	307.312	317.445	247.878	310.68	363.538	299.534	178.979	162.057	118.485	162.333	156.836	177.668	119.835	98.6828	140.731	117.535	93.1286	61.9842	33.983	54.0403	40.0587	148.199	149.068	132.112	200.332	33.2847	77.6324	97.8213	152.841
SIX5_GCAGGTGGCGTGCGTCTGCG	SIX5	235.937	123.706	141.985	231.886	178.876	193.66	178.418	170.093	188.863	167.425	208.714	163.596	117.593	141.071	179.385	185.144	188.656	158.44	151.004	114.693	234.358	180.264	198.64	177.879	163.129	177.759	199.708	134.364	256.637	188.861
RHBDD1_AGTGTTACCAGCAAAAAGAC	RHBDD1	481.764	470.083	452.504	477.099	444.367	412.802	537.858	554.707	498.355	519.016	583.328	554.333	554.734	458.103	582.897	597.704	497.092	497.089	419.382	400.009	356.225	432.062	457.096	354.506	489.387	557.261	585.043	603.144	545.497	616.231
RPS6_TACTTTCTATGAGAAGCGTA	RPS6	111.611	67.7128	176.615	119.941	163.813	149.492	109.395	112.972	80.4192	29.6213	41.0292	54.0813	31.9547	48.5407	31.7792	22.4741	20.2131	26.6082	13.8475	3.5399	0	0	12.4987	22.5481	37.3359	23.278	3.84054	0	13.8101	10.7086
IP6K2_AATAGCATATCCATTGAAAG	IP6K2	531.212	589.883	511.376	485.095	562.99	592.872	424.556	614.367	548.313	757.274	542.298	558.389	559.847	538.499	522.684	543.66	634.092	564.819	358.058	531.693	417.434	446.369	491.021	648.883	585.886	461.328	597.844	613.097	644.47	667.827
BAZ2B_GCTGGGGGAGCAAATAGTGG	BAZ2B	365.915	306.01	294.359	297.187	218.417	338.056	337.301	352.88	275.375	251.137	339.828	339.36	309.322	315.515	243.362	262.733	271.005	278.176	292.776	266.909	337.476	241.306	319.163	422.15	398.632	332.241	300.842	438.921	340.648	354.357
BIRC8_GGACGTTAAGAAAATAATGG	BIRC8	285.385	188.815	221.635	105.282	237.247	215.744	154.976	227.214	173.023	146.818	148.062	162.244	214.736	300.346	157.642	161.064	157.213	137.879	140.454	206.022	242.078	238.445	167.84	215.459	260.202	191.162	107.535	102.515	127.743	138.238
ENOPH1_CCAGCACACATTATCTACCA	ENOPH1	332.008	283.873	353.23	371.817	335.158	326.165	342.51	264.025	330.206	337.425	504.837	371.809	329.773	327.65	380.096	389.016	315.923	380.981	390.369	508.33	379.936	524.579	359.784	379.559	420.459	457.801	544.077	443.898	349.855	317.364
CCDC23_ATCTGTCAGCAGAGTTGAGA	CCDC23	395.583	492.22	371.7	321.175	338.924	366.935	382.882	394.769	403.315	409.546	356.775	394.793	348.946	321.582	366.297	433.429	396.776	412.427	278.929	187.615	284.539	204.109	333.448	350.748	329.13	351.992	320.045	273.704	385.531	292.052
BEND5_TGTCAAAATCCAGCCGCGAG	BEND5	428.078	338.564	367.082	395.805	380.348	336.357	359.44	291.951	339.954	329.698	454.888	394.793	347.668	367.089	463.307	354.77	376.562	384.609	317.834	322.131	257.518	350.991	291.041	301.893	234.929	299.792	403.257	293.61	386.682	358.251
HSFY2_TTTAAATATGCCTCTAACAA	HSFY2	129.977	190.117	159.3	74.6299	124.272	108.722	91.1624	111.703	107.226	140.379	162.333	143.315	219.849	218.433	137.989	127.353	169.191	151.183	93.6357	132.392	174.252	101.101	174.982	145.31	100.52	134.025	99.8541	170.194	166.872	260.9
TSPYL6_AGATATGTTTGATGGCCGCT	TSPYL6	610.329	842.504	621.039	747.632	674.081	676.112	677.206	670.218	827.343	801.062	716.226	704.409	677.44	624.962	748.902	720.777	796.546	858.718	890.858	967.809	798.473	823.112	657.521	611.303	564.059	678.589	920.45	862.914	772.213	849.873
RSPH4A_GGTGATCTCAAGCATGCTGG	RSPH4A	142.693	160.167	177.769	179.911	186.408	178.371	217.487	210.712	132.814	118.485	207.822	206.861	224.961	148.656	245.453	203.872	187.158	170.534	261.784	213.102	174.252	168.819	208.907	214.207	224.015	178.465	188.187	149.293	150.76	178.152
DNAH14_GAATGACACGTCATCTAAGG	DNAH14	244.414	170.584	193.93	183.91	201.471	149.492	214.883	168.824	219.325	171.288	171.252	173.06	214.736	191.129	197.784	167.486	163.202	177.791	191.228	158.588	122.969	203.155	238.368	215.459	229.759	246.888	113.936	146.307	136.95	147
GDI2_TAAGATGCTGCTTTATACAG	GDI2	141.28	192.721	219.326	134.6	280.553	214.046	204.464	199.288	276.593	215.076	161.441	140.611	227.518	133.487	268.869	163.205	229.83	255.197	159.576	305.847	76.649	307.117	323.181	298.135	318.791	249.71	23.0433	341.383	56.3911	504.277
LIPJ_CAAATGGAAGTCAATAGTCA	LIPJ	429.491	510.45	476.745	409.132	478.259	494.343	488.37	434.118	465.457	609.168	478.079	539.461	447.366	535.465	546.937	528.677	627.355	534.582	559.177	627.27	569.077	639.986	470.041	549.922	484.792	479.668	628.569	552.384	477.598	444.893
SHFM1_GGTAGACTTAGGTCTGTTAG	SHFM1	306.577	298.197	315.137	227.888	239.129	271.804	252.65	331.301	244.913	226.667	206.93	239.31	158.495	160.791	200.711	230.627	169.94	182.629	193.206	190.447	206.235	215.554	266.937	202.933	246.991	245.477	96.0135	149.293	199.095	307.629
ITGA8_GTTAACATCTGATACGACAA	ITGA8	460.572	514.357	485.98	445.114	649.604	472.259	388.091	440.465	376.508	457.198	524.46	534.053	484.434	456.586	528.538	585.397	540.513	558.772	793.925	831.169	859.682	947.103	442.811	647.63	516.958	533.983	541.516	479.728	489.106	496.489
IL13_ACCATGCTGCCATTGCAGAG	IL13	654.125	674.524	692.608	867.573	645.838	822.207	754.043	778.113	852.931	850.002	858.044	794.995	855.109	835.81	871.419	818.7	838.469	884.117	1012.19	862.32	925.853	763.977	864.196	794.193	813.922	826.722	1045.91	822.107	768.76	697.032
SLC22A5_GGTCGCTATCAGGAACACGG	SLC22A5	391.345	428.414	443.269	537.069	429.303	467.163	416.742	398.577	515.414	490.683	481.647	555.685	476.765	455.069	468.325	488.009	531.53	530.954	548.626	584.792	548.674	554.146	482.093	513.595	472.729	524.813	567.12	475.747	508.671	460.469
ANKRD45_GAAAAAAGACAAAATACCTC	ANKRD45	299.513	283.873	288.587	277.197	335.158	421.296	268.278	293.22	313.148	324.546	321.99	290.687	375.788	356.471	495.505	307.146	355.601	337.44	283.545	267.617	218.367	285.18	433.884	349.495	343.49	381.618	247.075	264.746	304.972	309.576
FOXRED1_CAGGGGAGGAGCATCGACTA	FOXRED1	137.041	233.088	165.072	274.532	165.696	181.769	199.255	214.521	146.217	249.849	151.629	200.101	230.074	185.061	288.104	186.749	226.836	187.467	151.004	134.516	193.001	105.87	176.767	182.89	206.209	199.627	149.781	204.034	172.626	218.066
CECR2_AGGTGGTCAGACATCCACCT	CECR2	395.583	468.781	414.411	535.736	389.762	402.609	412.835	416.348	377.727	472.652	527.135	401.553	440.975	449.002	471.252	401.859	562.223	511.603	412.129	396.469	476.437	524.579	465.577	536.143	449.754	503.651	572.241	591.2	437.319	542.244
HCAR2_CAATAGTGATGCCCCACAGA	HCAR2	299.513	233.088	253.956	183.91	220.3	214.046	255.255	248.793	197.393	216.364	240.823	282.575	207.067	221.467	340.79	324.804	369.825	402.751	245.299	288.856	223.881	294.718	250.867	273.082	245.842	227.842	264.997	211.996	164.57	207.357
MAP1B_CATCCGACACTTAGACCGAG	MAP1B	484.59	149.749	304.748	290.524	220.3	285.394	239.627	250.062	311.929	239.546	192.659	166.3	221.127	168.376	259.251	247.75	323.41	187.467	265.081	231.51	247.041	139.252	191.944	241.765	207.358	216.556	185.626	258.775	293.464	288.158
GRIN2C_CTGCGCCAGAAGGTGCGCGA	GRIN2C	72.0527	139.332	69.2608	53.3071	82.848	84.9387	118.511	135.821	112.1	131.364	129.331	121.683	103.533	80.3956	94.9195	113.441	93.5791	85.8718	170.127	256.289	157.709	123.991	122.309	92.6976	82.7133	90.9958	143.38	48.769	65.5978	126.556
TUBB1_TGTGGTGGAGCCCTACAACG	TUBB1	377.217	373.723	434.035	418.461	352.104	363.538	405.022	341.456	554.405	417.274	477.187	381.273	439.697	512.711	434.037	383.665	430.464	465.643	497.192	430.452	473.68	441.6	407.101	455.972	406.674	406.307	431.421	422.997	387.833	454.628
LMBR1_TCACTGTGAACATACGAGAA	LMBR1	262.78	183.606	204.319	118.608	210.886	207.25	195.348	219.598	231.51	198.334	195.334	187.932	177.668	274.558	166.841	154.643	208.12	191.095	139.135	201.774	207.89	230.815	206.229	245.523	230.908	146.017	183.066	216.973	178.38	267.715
MPZL2_AAACTGCAGTTCGACGACAA	MPZL2	224.635	238.297	286.278	211.896	237.247	237.828	203.162	294.49	241.258	264.016	276.501	309.615	279.923	283.66	276.395	348.884	281.486	293.899	317.834	293.812	292.81	285.18	273.186	279.345	289.497	281.452	487.749	463.804	392.436	272.582
FAM8A1_CCGCAGAGCTTCCCTTCGGG	FAM8A1	114.437	136.728	95.8108	115.943	160.047	137.601	161.488	90.124	116.973	144.243	144.494	117.627	120.15	100.115	137.57	130.029	145.235	135.46	152.323	169.915	131.792	202.201	141.057	150.32	147.62	167.178	103.695	92.5617	158.816	111.953
PRKACB_TGTGAAAACATTTCACCCCC	PRKACB	339.072	347.679	355.539	459.774	416.123	407.706	338.603	345.264	303.4	387.652	365.695	351.528	430.75	409.562	400.585	393.297	408.005	432.988	393.666	287.44	354.019	292.81	297.291	268.071	351.531	373.153	353.33	278.68	254.335	299.841
LIPE_AAAGTGATGTCAGGATACAG	LIPE	676.73	661.502	750.326	621.028	623.243	614.956	584.742	536.936	700.622	672.274	625.249	634.103	668.493	605.242	690.361	788.199	661.043	706.326	534.119	696.652	472.025	727.734	693.678	740.328	747.292	673.651	780.91	584.233	635.263	594.814
ELMOD1_GCTGCAGGTATTTCGCGGAA	ELMOD1	176.6	173.189	197.393	162.587	169.462	202.154	141.953	236.1	158.401	225.379	141.818	154.132	155.939	265.457	193.602	207.083	168.442	211.656	222.22	346.202	236.013	214.6	189.266	135.288	197.018	219.378	174.105	199.057	191.039	194.702
EXOSC3_ACGCACAGTACTAGGTCAGG	EXOSC3	165.297	140.634	159.3	135.933	167.579	110.42	152.371	97.7401	159.62	88.8638	73.1389	78.4178	131.654	89.4969	28.434	59.931	53.153	56.8447	32.9703	26.9032	0.551431	17.168	83.0271	56.3701	98.222	76.1826	25.6036	10.9482	127.743	19.4702
ANGPT1_TTGCAATATGGATGTCAATG	ANGPT1	337.659	204.441	361.311	229.221	363.401	288.792	281.301	317.338	242.476	303.94	290.772	279.871	272.254	271.525	371.733	292.164	314.426	335.021	291.458	242.837	211.75	213.647	256.67	278.093	223.441	266.639	366.132	303.562	220.961	357.278
WFS1_CACGTCCGAGAACGAACGGG	WFS1	180.838	253.923	166.226	282.528	160.047	146.095	144.558	112.972	116.973	115.909	109.708	174.412	135.488	157.757	189.003	210.294	166.945	198.352	177.38	230.802	189.692	267.058	144.628	142.804	121.772	192.573	181.786	194.081	181.832	159.655
ARSK_TTACGGATAAGATTAACCAT	ARSK	310.816	225.275	265.5	235.884	263.607	265.009	255.255	308.453	240.039	306.516	262.23	269.054	306.765	250.288	304.411	256.847	270.257	204.399	285.523	192.571	288.399	175.495	295.505	274.335	240.098	218.672	277.799	258.775	255.486	274.529
WWTR1_AGGCTTACCGAGATTTGGCT	WWTR1	199.205	285.175	252.802	462.439	256.076	225.937	274.79	275.449	283.904	275.607	260.446	202.805	232.63	226.018	203.638	204.407	206.623	217.703	174.083	175.579	220.021	195.525	245.51	279.345	232.631	250.415	145.941	155.265	170.324	247.271
KCNN2_AGATAGAGTCTTAAGAACAT	KCNN2	144.105	204.441	173.152	114.61	128.038	157.986	148.464	161.208	212.014	245.985	227.444	164.948	198.119	174.443	211.164	167.486	216.355	182.629	187.271	109.737	179.767	123.038	245.51	305.651	216.548	233.485	151.061	178.156	206	168.417
CEP72_CCTCATTGCAGAGTGCGAGT	CEP72	480.351	462.27	439.806	527.74	353.987	380.525	444.091	434.118	408.188	333.561	432.59	416.426	448.644	367.089	431.528	488.009	386.295	468.062	371.905	363.902	489.12	403.449	444.597	387.075	426.778	400.664	439.102	458.827	471.844	569.502
KHDC3L_GTCTTCAATAGAAGTCCGGG	KHDC3L	97.4831	188.815	118.898	87.9567	133.687	135.902	93.767	81.2385	121.847	99.1669	148.062	183.876	94.586	95.5645	102.446	91.5018	142.24	137.879	133.2	51.6826	81.6119	103.008	133.915	154.078	149.343	216.556	70.4099	84.5994	92.0671	102.218
C19orf48_CTATTGTGACCAGGCCTATG	C19orf48	194.966	165.376	223.943	190.573	165.696	214.046	164.092	223.406	155.965	208.637	210.497	164.948	175.112	283.66	151.788	183.539	196.891	226.17	193.206	269.74	257.518	281.365	192.391	192.911	145.897	187.635	222.751	257.779	142.704	241.43
FAHD2A_TCATCGTCTTCGGGAGTGTG	FAHD2A	214.745	147.145	256.265	222.557	197.705	154.588	158.883	178.979	176.679	279.47	237.256	244.718	274.811	222.984	242.525	217.25	206.623	255.197	209.691	256.289	176.458	206.97	191.944	210.449	233.206	242.656	271.398	263.751	178.38	229.748
KLF16_CGCGCGCACATCCAGGCCGG	KLF16	38.1455	39.0651	40.4022	89.2894	80.9651	66.2522	63.8137	69.8144	70.6714	83.7123	23.1904	63.5455	21.7292	53.0914	56.868	39.5973	54.6502	60.4731	54.7307	77.8778	36.3945	30.5209	59.3689	37.5801	72.3741	60.6639	80.6514	65.6889	26.4693	37.9668
ZNF335_ACACGGTACCTGATCCTACA	ZNF335	634.346	687.545	682.219	651.679	623.243	613.257	602.974	803.5	623.858	627.198	701.063	713.873	596.914	687.154	565.753	611.082	603.398	599.893	491.917	419.832	443.902	396.772	595.921	576.228	503.173	688.465	393.015	511.577	536.291	561.714
ADPRHL1_TGCGGCGAACGACACAAACA	ADPRHL1	156.821	156.26	207.782	251.876	205.237	251.419	188.836	272.911	201.048	220.228	195.334	240.662	222.405	204.781	217.018	214.039	205.874	200.771	215.626	220.182	186.384	297.579	208.014	324.442	270.541	288.506	284.2	347.355	174.927	293.999
DNAJC28_ATTTGTTTGTTCTATCACAT	DNAJC28	203.443	200.534	244.722	242.547	259.841	183.468	188.836	158.669	220.544	280.758	221.201	224.437	207.067	263.94	261.342	275.04	261.273	258.825	253.871	304.431	239.321	293.764	194.623	270.577	287.199	246.888	209.95	206.024	295.765	263.821
IWS1_CATATGGCTGTCTGAATGGA	IWS1	218.984	105.476	181.233	158.589	220.3	173.275	223.999	159.938	221.762	163.561	112.384	148.723	172.556	259.389	119.172	200.127	129.514	224.96	172.764	187.615	189.692	135.437	199.979	161.594	233.206	198.216	151.061	121.425	204.849	255.059
ITGB7_CCGGGTATCCCTCAGCACGA	ITGB7	103.134	223.973	181.233	183.91	169.462	193.66	157.581	158.669	110.881	195.758	90.0858	221.733	125.263	125.902	127.117	142.336	150.475	170.534	114.077	208.146	87.1262	238.445	157.127	156.584	183.233	209.502	147.221	188.109	140.402	166.47
MEF2D_GGTGAGCGAATGAGTAGACT	MEF2D	286.798	265.643	212.4	282.528	235.364	236.13	279.999	260.217	349.702	292.349	298.799	294.743	263.307	230.568	291.867	310.892	357.098	309.622	350.145	230.802	290.053	259.428	266.044	243.018	263.649	251.826	373.813	293.61	316.481	381.615
EDC3_CCGAGCCCATTGTCTATCGA	EDC3	768.562	528.681	645.28	654.345	585.585	558.897	582.137	628.329	534.91	638.789	653.791	559.741	525.336	430.799	472.507	596.634	539.764	576.914	485.982	582.668	537.094	541.747	594.135	597.524	617.478	560.083	686.177	657.885	611.095	419.582
SLC26A4_GTTGTGAAGCCACCAACCAA	SLC26A4	166.71	134.123	206.628	110.612	143.101	139.299	125.023	218.329	138.906	123.637	192.659	124.387	141.879	128.936	184.821	166.415	203.628	191.095	123.968	75.0459	74.4432	74.3948	210.246	164.1	217.122	189.751	116.496	205.029	128.894	184.967
CARD18_CTCTAATAGGCAATCCAGCA	CARD18	156.821	141.936	160.454	169.25	139.335	154.588	108.093	137.09	166.931	170	248.851	228.493	287.593	186.578	194.857	170.161	214.858	235.845	249.256	372.398	248.144	306.163	179.892	169.11	222.866	153.071	270.118	191.095	163.419	189.834
FGF2_TTCACGGATGGGTGTCTCCG	FGF2	180.838	235.693	204.319	179.911	246.661	132.504	230.511	215.79	147.435	199.622	172.144	202.805	186.616	201.747	194.02	149.827	178.175	188.676	152.982	145.136	128.484	208.878	183.463	204.185	210.804	217.967	218.911	167.208	165.721	158.682
OR14J1_ACTTCTCCATACCTCTCTGT	OR14J1	302.339	322.938	278.198	219.892	289.968	270.105	309.952	262.756	237.602	242.122	204.254	219.029	236.465	213.883	196.529	207.083	165.448	175.372	97.5921	99.1172	163.224	127.806	254.438	289.367	246.417	258.174	195.868	196.071	227.866	165.496
YWHAE_AATTTGCCACAGGAAACGAC	YWHAE	354.612	312.521	330.143	405.134	318.212	312.574	268.278	382.075	363.105	385.077	365.695	302.855	346.389	307.93	406.439	339.787	392.284	358.001	581.596	511.162	706.384	688.629	377.193	372.043	339.469	368.216	477.507	346.36	378.626	360.198
RSC1A1_TCAATCAGAAACCATAGCTG	RSC1A1	295.275	261.736	202.011	198.569	207.12	224.238	175.813	217.059	171.805	208.637	221.201	221.733	194.285	160.791	167.259	147.152	152.721	157.23	174.083	186.199	168.738	216.508	249.528	235.502	230.908	222.905	158.742	253.798	189.888	238.51
TLX2_GCCGGCGGGACCGTAGCCCG	TLX2	128.565	238.297	200.856	155.923	175.111	146.095	152.371	170.093	169.368	159.697	149.846	229.845	148.27	178.994	232.908	196.381	183.415	182.629	127.265	146.552	188.038	158.327	259.348	200.427	246.417	217.261	215.07	253.798	204.849	199.569
MYBL2_CAAGGGGCCATGGACCAAAG	MYBL2	56.5119	57.2955	58.8717	70.6319	88.4967	73.0473	88.5578	69.8144	71.8899	74.6971	27.6501	104.106	17.8947	84.9462	24.2525	61.5363	62.1366	54.4258	81.107	44.6028	24.263	26.7058	69.6357	31.3167	21.8271	72.6556	35.8451	12.9387	42.581	31.1523
FAIM_ACTTGGGTATTACACATGGA	FAIM	353.199	247.412	367.082	306.516	273.022	246.322	287.813	243.716	271.719	208.637	286.312	289.335	287.593	312.481	349.989	340.857	351.109	366.467	406.854	238.589	306.596	275.642	293.273	263.061	310.749	283.568	391.735	403.091	377.475	284.264
BRD7_CCTGTGGATCCCATTGTAGG	BRD7	207.681	174.491	158.146	119.941	252.31	225.937	153.674	194.211	190.082	220.228	170.36	220.381	146.992	175.96	115.827	265.944	181.169	172.953	245.299	209.562	172.598	183.126	188.373	141.552	153.939	176.349	151.061	114.458	169.173	133.371
CAPN13_GGTGGCGAGGACGCACAAAG	CAPN13	213.332	343.773	275.889	327.839	207.12	281.996	244.836	330.032	257.098	300.076	211.389	302.855	256.916	221.467	272.632	260.593	278.492	303.575	255.85	192.571	218.918	261.336	278.543	289.367	311.898	201.743	294.442	307.544	241.676	269.662
FMNL1_GGTAGTTCATGATGGCGCGT	FMNL1	114.437	87.2454	129.287	93.2874	111.092	166.48	128.93	142.167	180.334	104.318	90.0858	83.826	93.3078	128.936	118.336	118.792	160.956	162.068	115.396	91.3294	128.484	149.743	72.7603	119.004	107.987	125.56	67.8496	108.486	155.363	120.715
SPG11_TTTAAATGTAGGCAACACCC	SPG11	340.484	365.91	308.211	282.528	289.968	327.863	255.255	162.477	309.492	354.167	360.343	339.36	264.585	291.244	289.776	308.216	294.213	279.386	423.339	533.109	384.348	557.007	317.378	352	270.541	355.519	416.059	388.162	360.212	405.953
COX16_TAGAGTCGGAATATGAGGTA	COX16	166.71	247.412	176.615	125.272	182.642	173.275	184.929	225.945	224.199	94.0153	166.792	143.315	223.683	203.264	142.17	133.239	156.464	123.365	112.758	4.24788	153.849	3.81512	169.625	121.509	203.911	98.0498	44.8063	50.7596	242.827	224.88
GDPD1_GAATCTAAAGAGAGCAACTG	GDPD1	131.39	174.491	133.904	95.9528	160.047	115.517	117.209	129.474	81.6377	133.94	136.467	169.004	163.608	83.4293	153.042	123.608	139.994	125.784	217.604	119.649	235.461	189.802	92.8475	58.8755	73.5229	83.2365	176.665	150.288	154.212	163.549
MUC7_AATGTCTGCACAAACGCTGT	MUC7	440.793	535.192	473.282	489.093	457.547	480.753	485.765	443.004	476.423	561.516	539.623	565.149	426.915	512.711	528.12	519.045	465.65	539.42	592.147	596.827	638.558	631.402	510.215	538.648	447.456	603.112	581.202	527.502	345.252	472.151
SPINT3_GTCAAACCTACATGACGCGA	SPINT3	220.396	264.34	190.467	247.878	188.291	208.949	222.697	236.1	218.107	234.394	248.851	269.054	319.547	292.761	383.023	341.393	247.798	298.737	323.109	404.965	245.387	324.285	303.986	249.281	287.199	242.656	316.205	333.421	298.067	257.98
SHCBP1L_ATACAGGATGGAACAATACC	SHCBP1L	210.507	175.793	167.38	243.88	148.75	190.263	218.79	211.982	218.107	139.091	175.712	189.284	172.556	163.825	142.588	192.635	135.503	191.095	290.139	179.827	180.87	182.172	150.431	125.267	165.427	165.062	145.941	213.987	149.609	117.794
RANBP17_ATTCATGCTAAAAAACCACA	RANBP17	274.083	315.125	234.332	245.213	237.247	220.841	184.929	300.837	371.634	346.44	243.499	246.07	260.751	300.346	376.751	295.374	273.251	297.528	314.537	223.014	317.625	242.26	214.71	184.142	188.977	181.286	368.692	262.756	210.603	310.549
NRCAM_CAGCGGGACCTACACGTGTG	NRCAM	707.812	787.812	735.319	1018.17	728.686	842.592	833.485	864.429	698.185	772.729	795.609	813.923	938.191	828.226	677.817	825.656	676.016	722.049	953.501	898.427	903.245	985.254	756.172	734.065	809.901	738.548	826.997	845.994	712.369	724.29
ZNF578_AATTCCTGAACCCTGCGCAG	ZNF578	518.497	355.492	479.054	325.173	418.006	475.657	393.301	429.041	357.013	352.879	440.617	397.497	434.584	411.079	315.701	302.865	305.442	336.231	226.176	239.297	244.836	303.302	361.123	399.602	401.504	399.958	375.093	357.308	448.827	408.873
SIMC1_GCTCTCCATAGCCGTAGAGG	SIMC1	186.489	295.592	289.741	317.177	282.436	268.406	333.394	360.496	253.442	264.016	268.473	282.575	305.487	212.366	298.975	348.349	298.705	299.947	226.836	214.518	323.69	204.109	294.612	216.712	259.053	284.979	234.273	284.652	182.983	299.841
KLHDC9_AGAGCCCAGCAGCGATACGG	KLHDC9	433.729	421.903	410.948	515.746	434.952	458.669	412.835	517.896	427.684	490.683	430.806	428.594	503.607	461.137	439.055	489.615	473.885	420.893	494.555	555.764	421.845	537.932	512.001	387.075	467.56	387.967	329.006	333.421	548.95	443.92
FAM156A_GAGGAGACACCGCGATCACA	FAM156A	594.788	578.163	558.704	708.985	589.35	545.306	519.626	528.051	461.801	645.229	495.026	584.078	494.659	388.326	526.029	550.616	562.223	529.745	568.408	496.294	596.097	360.529	461.559	567.459	509.491	555.851	477.507	462.808	491.408	421.529
RD3_GCTGGCTGGCCAGCACACCC	RD3	135.629	161.469	154.683	73.2973	116.74	147.793	130.232	119.319	75.5453	92.7275	130.223	112.219	185.337	168.376	145.933	120.397	122.027	104.014	139.135	230.094	184.73	249.89	129.451	139.046	128.091	137.552	172.824	149.293	80.5587	184.967
HIST1H2BA_CATCTACAAAGTGCTAAAGC	HIST1H2BA	152.582	208.347	163.917	203.9	173.228	197.058	145.86	286.874	216.888	179.016	209.605	187.932	300.374	277.592	210.328	198.521	180.421	245.521	287.501	441.78	259.173	419.663	207.568	245.523	243.545	263.112	166.423	200.053	242.827	245.324
KRTAP1-3_TGCTCCACCAGTGGGACATG	KRTAP1-3	196.379	194.023	181.233	151.925	195.823	174.974	179.72	163.746	181.552	117.197	198.902	159.54	195.563	183.545	150.115	188.89	208.869	203.19	214.966	162.127	191.347	262.289	128.558	201.68	207.358	154.481	329.006	283.657	218.659	184.967
MYL3_AAGATCACCTACGGGCAGTG	MYL3	768.562	951.886	872.686	996.843	820.948	900.35	923.345	822.54	967.467	1009.7	866.072	943.718	856.387	1102.78	792.389	850.806	901.354	899.84	1142.75	892.055	1107.27	907.044	856.608	845.552	891.465	832.365	1036.95	1060.98	866.581	1167.24
ART3_AATACCTGAAATGTACGGAC	ART3	387.107	294.29	319.754	387.809	318.212	370.333	416.742	318.607	364.323	319.395	262.23	374.513	371.953	386.809	375.915	371.893	381.803	345.906	418.064	546.561	564.114	487.381	421.385	400.854	333.725	413.361	325.166	321.478	353.307	367.013
SARS2_CTGTACGAGTATGCGCGCGA	SARS2	439.38	451.853	518.302	684.996	491.439	567.391	481.858	413.809	534.91	309.092	476.295	382.625	393.682	236.636	360.025	290.558	298.705	318.089	203.757	152.924	199.067	253.705	401.298	259.303	477.325	288.506	117.777	87.5852	408.548	318.337
ZNF616_GGATTACCTGATGTACAGTG	ZNF616	461.985	543.005	408.639	557.059	453.781	472.259	515.719	594.057	428.902	497.122	386.209	379.921	374.509	577.938	466.234	497.106	553.24	544.258	716.775	841.788	867.953	951.872	482.539	552.427	420.459	462.033	526.154	450.865	464.939	387.456
ARL6IP5_GGAAGAAATCGTCCCAGGCG	ARL6IP5	426.665	535.192	461.739	342.498	401.06	400.911	403.719	402.385	406.97	364.47	440.617	434.002	456.314	426.248	407.276	422.192	428.218	383.4	431.252	403.549	388.208	476.89	411.118	378.306	368.189	414.772	316.205	315.506	467.24	453.655
GDPD1_CTGGATGTCTCATTTCAAAG	GDPD1	240.176	200.534	244.722	178.579	224.066	178.371	203.162	185.325	263.19	216.364	148.062	170.356	207.067	148.656	167.259	194.776	104.809	200.771	211.01	212.394	292.259	199.34	234.797	216.712	179.787	129.087	225.312	160.241	163.419	180.099
OPA3_CCCCGCAGTGTATCACTGGG	OPA3	185.077	256.527	221.635	281.195	267.373	276.9	266.976	189.133	269.283	190.606	248.851	212.269	274.811	222.984	221.2	171.231	238.065	193.514	272.335	172.747	296.119	179.311	191.052	220.47	188.977	231.369	212.51	176.166	210.603	179.126
SUMO2_ATATTAATTTGAAGGTGGCG	SUMO2	66.4015	13.0217	40.4022	17.3248	48.9556	42.4694	37.7673	45.6967	30.4618	30.9092	20.5146	21.6325	12.7819	12.1352	22.58	37.992	56.1475	39.9123	25.0574	2.83192	0	4.7689	23.6583	17.5374	41.3566	49.3776	5.12072	9.95287	17.2626	22.3907
EFHC2_AGGAAATTTCCACCTTACAA	EFHC2	497.305	518.263	460.585	350.494	434.952	477.355	425.859	420.156	531.254	504.849	552.11	623.287	508.719	538.499	550.7	513.159	564.469	527.326	450.374	484.966	475.885	458.768	538.337	582.492	573.249	518.465	544.077	464.799	455.732	555.873
ADIPOQ_TGGATTCCCGGAAAGCCTCG	ADIPOQ	144.105	162.771	169.689	198.569	156.281	190.263	106.79	171.363	143.78	151.97	184.631	223.085	171.277	203.264	130.044	170.696	152.721	149.973	187.271	174.871	149.438	167.865	126.326	230.491	229.759	172.116	156.182	206.024	161.117	176.205
OR52J3_GAGCCTGACAAAAGGGTAGG	OR52J3	454.921	458.364	354.385	507.75	401.06	356.743	351.626	370.651	480.078	435.304	465.592	488.083	604.584	462.654	544.846	524.931	477.628	517.65	381.137	567.8	519.448	500.734	457.988	528.627	461.241	531.162	495.43	499.634	502.916	492.595
PLEKHG1_GCTGTCACAGCACACGAAGT	PLEKHG1	353.199	337.262	386.706	338.5	337.041	344.851	319.068	350.341	355.794	315.531	378.182	343.416	377.066	256.356	329.082	403.464	386.295	335.021	234.749	309.387	225.535	365.298	376.747	340.726	368.189	370.332	286.76	296.595	349.855	394.271
USP42_AAATATCTGACAAACAAGAG	USP42	478.939	597.696	512.53	326.506	399.177	458.669	411.533	468.391	436.213	511.289	523.568	497.548	426.915	423.214	526.448	436.64	476.879	367.677	495.874	467.975	619.809	577.037	569.584	578.734	484.792	565.726	674.655	644.946	414.302	565.608
PARP15_CAGAGCCGGACGAGATCGGG	PARP15	138.454	139.332	140.83	197.236	129.921	154.588	134.139	152.322	134.032	126.212	132.899	167.652	112.481	107.7	137.989	135.38	145.983	113.689	56.7089	84.2496	61.2089	63.9032	151.324	98.9609	132.112	134.025	85.7721	169.199	119.687	70.0926
NPTXR_GGATGGTGTCCTGGTCGGCG	NPTXR	255.716	194.023	202.011	215.894	303.148	210.648	255.255	316.069	198.611	166.137	199.794	236.606	227.518	254.839	285.595	234.373	244.054	258.825	360.695	562.136	456.034	620.911	221.852	238.007	247.565	222.199	190.747	160.241	250.883	321.258
ZNF251_TCCAGCTGGGAGATCAACTC	ZNF251	135.629	127.613	136.213	154.591	192.057	188.564	123.72	95.2014	103.57	99.1669	169.468	189.284	112.481	168.376	145.515	145.012	154.967	171.744	222.22	169.207	313.213	197.432	171.857	211.701	149.918	160.124	117.777	169.199	165.721	89.5628
TEX37_CCTGTGATGGGAAGAAGCCG	TEX37	474.7	509.148	423.645	365.154	538.512	484.151	453.207	512.818	427.684	410.834	346.072	484.027	247.969	341.302	371.315	325.34	418.486	339.859	243.321	210.978	187.487	193.617	426.295	458.477	418.162	309.668	311.084	324.463	306.123	414.714
SLC20A1_ATGAGGATGGTACCCCACAG	SLC20A1	767.149	856.827	839.21	811.601	643.955	740.665	795.717	747.649	647.009	761.138	604.734	567.853	460.148	734.178	558.227	620.714	622.863	656.738	507.083	685.325	660.063	743.948	786.972	603.787	780.032	735.021	743.785	618.073	638.715	660.039
EFHC2_AGGGTGTCGAGGGATTCGTA	EFHC2	464.811	459.666	559.858	597.04	557.341	480.753	738.415	582.633	442.306	658.107	633.276	616.527	663.38	579.455	691.198	653.355	572.704	638.596	586.212	557.18	591.135	670.507	512.447	564.954	520.979	610.871	651.612	824.097	599.587	562.688
GNL3_ACTTCGCAGAGCAAGCGCAG	GNL3	214.745	192.721	243.567	210.563	331.392	224.238	282.603	194.211	186.426	105.606	106.141	109.515	163.608	133.487	134.225	66.3522	116.038	74.9867	56.7089	55.9304	25.9173	52.4579	123.202	131.53	113.731	94.5228	20.4829	36.8256	132.346	89.5628
TFCP2L1_GTCAGTCTTCTGTTTCCGAT	TFCP2L1	536.863	440.133	621.039	555.727	546.044	453.573	509.207	489.97	466.675	490.683	670.737	639.511	603.305	538.499	590.424	561.318	616.874	465.643	763.592	599.659	714.104	571.314	608.866	590.008	478.473	495.187	465.986	583.238	630.659	595.787
DMGDH_CCTGGTTTGTAGAACCAGTG	DMGDH	217.571	174.491	187.004	214.561	201.471	217.443	169.302	222.137	164.494	222.803	214.957	220.381	253.081	262.423	176.458	208.688	256.781	233.426	147.048	286.732	179.767	285.18	269.615	230.491	194.721	191.867	266.278	266.737	211.754	233.642
ERVFRD-1_CTTTGCTAGATAAATCCAGC	ERVFRD-1	203.443	204.441	232.024	146.595	148.75	173.275	162.79	190.403	213.233	195.758	242.607	223.085	241.578	233.602	190.257	183.004	239.563	195.933	287.501	180.535	261.93	230.815	183.91	214.207	172.319	175.643	298.282	209.01	232.469	239.483
ZNF749_GCTGGAGAAAGGCCTTATGA	ZNF749	283.972	395.859	372.854	267.868	295.617	329.562	324.278	355.419	348.483	403.107	370.154	331.248	465.261	353.437	268.451	334.436	293.464	387.028	292.776	363.194	352.916	412.033	357.106	330.705	387.144	340.705	332.847	422.997	353.307	308.602
HSD17B14_GATTGTGTTGTCAACAACGC	HSD17B14	428.078	358.097	479.054	534.404	427.42	385.622	451.905	430.31	399.659	381.213	336.261	388.033	442.254	412.596	262.597	398.648	299.453	291.48	414.107	364.61	419.088	362.436	384.335	399.602	349.234	366.805	221.471	243.845	384.38	269.662
TNFAIP8_CAGGCACAAAAGAAGATCTT	TNFAIP8	138.454	113.289	150.065	123.939	126.155	146.095	114.604	100.279	177.897	181.591	123.979	109.515	154.661	178.994	165.586	153.573	177.426	129.412	187.931	233.633	224.984	186.941	117.845	96.4556	109.71	134.025	239.394	251.808	134.648	149.92
KDM3A_TGCATTTGAAACATCCGATG	KDM3A	285.385	322.938	438.652	387.809	323.86	441.681	380.277	375.728	322.895	419.849	377.29	331.248	392.404	467.204	356.68	345.138	354.852	337.44	414.767	336.291	272.959	272.781	419.599	363.274	398.058	362.573	403.257	365.27	394.738	281.344
STMN4_TTGTAGGACGACTTATTCAG	STMN4	617.393	490.918	633.737	577.049	619.477	631.944	618.602	649.908	590.959	495.834	625.249	565.149	469.095	535.465	710.432	620.179	839.218	711.164	499.83	461.603	575.143	501.688	772.242	670.178	547.401	699.046	714.341	667.837	630.659	676.588
ATP2B2_GCAGGAACAGAAATTTACCG	ATP2B2	169.536	158.865	135.059	98.6181	112.975	115.517	112	86.316	106.007	92.7275	162.333	105.458	98.4206	142.588	81.9569	115.581	128.765	118.527	87.701	87.7895	136.755	139.252	89.7229	92.6976	133.26	139.668	161.303	136.354	156.514	153.814
RRAGB_CTATTACCAATCATGCCTGG	RRAGB	254.304	255.225	206.628	263.87	229.715	152.89	320.371	307.183	196.174	198.334	217.633	283.927	270.976	218.433	253.397	248.285	293.464	296.318	238.705	142.304	277.921	218.416	217.835	279.345	240.673	279.336	258.596	160.241	189.888	257.98
[truncated: 75,981 more rows]
